# Supplementary material for: Transcriptomic Characterization of a Chicken Embryo Model Infected With Duck Hepatitis A Virus Type 1
Source: Front Immunol. 2018 Aug 24;9:1845. doi: 10.3389/fimmu.2018.01845 (PMC6117380; doi:10.3389/fimmu.2018.01845)
Supplement: Supplementary file 1 [file data_sheet_1.xlsx]

## Sheet: (CH vs CH60 group)(p<0.01,FC>4)
Dbxref	id	baseMean	baseMean_control_Sample_CH	baseMean_case_Sample_CH60	foldChange	log2FoldChange	pval	padj	up_down
CGNC:54342,GeneID:554219	IFNB	42.3847	0	84.7694	Inf	Inf	4.7e-11	1.08e-09	Up
CGNC:8294,GeneID:395337	IL6	6.54227	0	13.0845	Inf	Inf	8.81e-05	0.000729575	Up
CGNC:63371,GeneID:100859780	LOC100859780	5.36767	0	10.7353	Inf	Inf	0.000496338	0.00334061	Up
GeneID:107055791	LOC107055791	13.3945	0	26.7891	Inf	Inf	0.00166218	0.00950714	Up
GeneID:107057320	LOC107057320	3.52503	0	7.05005	Inf	Inf	0.00759256	0.0342092	Up
CGNC:52209,GeneID:424523	LOC424523	16.2752	0	32.5504	Inf	Inf	7.91e-05	0.000664483	Up
CGNC:50889,GeneID:418983	MMP7	3.69343	0	7.38686	Inf	Inf	0.00591769	0.0278403	Up
CGNC:49451,GeneID:395740	PAX9	4.54257	0	9.08515	Inf	Inf	0.00169567	0.00965277	Up
CGNC:50830,GeneID:418700	LOC418700	3515.34	39.1944	6991.49	178.38	7.47881	4.1e-108	2.66e-105	Up
CGNC:588,GeneID:428264	IL10	60.2013	0.67862	119.724	176.423	7.46289	1.07e-32	9.73e-31	Up
CGNC:71627,GeneID:101752219	LOC101752219	20009	281.974	39735.9	140.921	7.13874	0	0	Up
CGNC:2247,GeneID:427807	ANKFN1	116.949	1.65426	232.244	140.392	7.13331	3.65e-36	3.96e-34	Up
CGNC:55010,GeneID:769132	SLCO4C1	230.075	3.44572	456.705	132.543	7.05031	5.37e-42	7.29e-40	Up
CGNC:6021,GeneID:417700	SLC26A3	19.1082	0.297016	37.9193	127.668	6.99625	0.00382335	0.0192042	Up
CGNC:65812,GeneID:100857191	LOC100857191	2326.26	39.0882	4613.44	118.026	6.88297	3.12e-32	2.75e-30	Up
CGNC:69724,GeneID:101750271	LOC101750271	746.727	12.5975	1480.86	117.551	6.87715	9.26e-30	7.18e-28	Up
CGNC:51884,GeneID:423079	HPS5	57537.6	1042.14	114033	109.422	6.77375	1.82e-87	7.67e-85	Up
CGNC:505,GeneID:428263	AVPR1B	17.9454	0.33931	35.5515	104.776	6.71116	9.97e-11	2.2e-09	Up
CGNC:4367,GeneID:427406	CCL19	1481	30.0198	2931.98	97.6682	6.60982	2.2e-96	1.12e-93	Up
CGNC:49723,GeneID:396260	AVD	1443.36	31.3241	2855.4	91.1568	6.51028	1.1e-116	8.84e-114	Up
CGNC:51224,GeneID:420300	LOC420300	26.9831	0.594032	53.3721	89.8472	6.4894	6.06e-06	6.63e-05	Up
CGNC:56676,GeneID:771308	LOC771308	41.4163	0.933342	81.8992	87.7484	6.4553	2.37e-08	3.86e-07	Up
CGNC:65604,GeneID:100857411	PLACL2	1468.89	36.9446	2900.83	78.5185	6.29496	8.93e-191	1.88e-187	Up
CGNC:5819,GeneID:424930	B3GNT7	1708.88	43.2238	3374.53	78.071	6.28672	5.43e-94	2.54e-91	Up
GeneID:395551	CCL4	433.06	11.1863	854.933	76.4267	6.256	1.08e-26	7.38e-25	Up
CGNC:50458,GeneID:417192	LOC417192	150.989	4.28415	297.693	69.4871	6.11867	1.45e-39	1.77e-37	Up
CGNC:49485,GeneID:395799	TPH1	458.744	13.0325	904.455	69.3999	6.11686	8.87e-12	2.22e-10	Up
CGNC:49259,GeneID:395313	MX1	6064.2	173.467	11954.9	68.9178	6.1068	7.53e-177	1.41e-173	Up
CGNC:2831,GeneID:771952	P2RX7	265.589	7.88948	523.288	66.3274	6.05153	5.69e-45	8.33e-43	Up
CGNC:12592,GeneID:101750396	IL18RAP	9.90616	0.297016	19.5153	65.7046	6.03792	5.38e-06	5.94e-05	Up
CGNC:64842,GeneID:100858236	MADCAM1	1841.87	55.8822	3627.86	64.9197	6.02059	7.56e-128	7.07e-125	Up
CGNC:12732,GeneID:418837	EPSTI1	2500.95	76.0234	4925.87	64.7941	6.01779	2.3e-206	5.53e-203	Up
CGNC:49883,GeneID:407087	KK34	11.3877	0.349834	22.4257	64.1037	6.00233	6.94e-07	9.12e-06	Up
CGNC:50049,GeneID:415686	MLKL	221.382	6.83998	435.924	63.7318	5.99394	3.64e-73	1.02e-70	Up
CGNC:49835,GeneID:396495	IL8L2	98.256	3.06431	193.448	63.1292	5.98024	8.06e-18	3.23e-16	Up
CGNC:70199,GeneID:101750757	LOC101750757	10.5738	0.33931	20.8082	61.3251	5.93841	2.15e-06	2.58e-05	Up
CGNC:1577,GeneID:424349	ATP6V1G3	143.411	5.00506	281.816	56.3063	5.81522	2.44e-39	2.93e-37	Up
CGNC:66178,GeneID:373903	DIO2	536.355	20.0842	1052.63	52.4108	5.71179	1.4e-81	5.01e-79	Up
CGNC:52759,GeneID:426356	S100A9	401.527	15.2064	787.847	51.8104	5.69517	3.32e-87	1.36e-84	Up
CGNC:9068,GeneID:771693	TNIP3	41.4356	1.56967	81.3016	51.7954	5.69475	0.000174401	0.0013438	Up
CGNC:49866,GeneID:403120	IFI6	24642.2	956.63	48327.8	50.5188	5.65875	3.87e-244	3.26e-240	Up
CGNC:12103,GeneID:428382	KCNK9	8.6109	0.33931	16.8825	49.7554	5.63678	3.26e-05	0.000301533	Up
CGNC:2475,GeneID:424402	SELE	110.229	4.38022	216.077	49.3302	5.6244	1.92e-19	8.62e-18	Up
CGNC:51528,GeneID:421702	VNN1	20531.6	827.625	40235.7	48.6158	5.60335	1.21e-47	1.94e-45	Up
CGNC:3925,GeneID:428842	OLFML1	216.824	8.8123	424.835	48.2093	5.59124	7.7e-13	2.13e-11	Up
CGNC:51737,GeneID:422427	DDX60	6393.75	269.567	12517.9	46.4372	5.53721	9.75e-243	5.47e-239	Up
GeneID:107055111	LOC107055111	8.1115	0.349834	15.8732	45.3734	5.50378	6.45e-05	0.000555005	Up
CGNC:57466,GeneID:772339	SERPINA3	20712.1	907.596	40516.5	44.6416	5.48032	4.37e-39	5.19e-37	Up
CGNC:50642,GeneID:417973	LOC417973	1145.91	50.4054	2241.41	44.4677	5.47469	1.05e-172	1.61e-169	Up
CGNC:12587,GeneID:418715	IL1R2	137.644	6.25742	269.03	42.9938	5.42606	7.08e-14	2.17e-12	Up
CGNC:51132,GeneID:419941	AGPAT1	13.6523	0.67862	26.6259	39.2354	5.29408	1.94e-07	2.78e-06	Up
CGNC:7942,GeneID:771940	CP	14711.1	731.307	28691	39.2325	5.29398	1.47e-206	4.11e-203	Up
CGNC:5424,GeneID:424902	ATP13A5	13.4018	0.67862	26.125	38.4972	5.26668	0.00130117	0.00771763	Up
CGNC:27378,GeneID:431636	SLC46A2	233.595	11.9832	455.206	37.987	5.24743	2.7e-07	3.79e-06	Up
CGNC:53425,GeneID:428660	GVIN1	500.166	27.0397	973.293	35.9949	5.16972	1.49e-41	2.01e-39	Up
CGNC:50416,GeneID:417039	IL4I1	139.193	7.6782	270.708	35.2567	5.13983	4.54e-51	8.12e-49	Up
CGNC:12414,GeneID:422000	C3H8ORF80	1655.01	94.4889	3215.54	34.0309	5.08877	5.05e-109	3.4e-106	Up
CGNC:8301,GeneID:395210	SPP1	10015.2	573.604	19456.7	33.9201	5.08407	2.35e-40	2.97e-38	Up
GeneID:107056699	LOC107056699	29.5155	1.69635	57.3346	33.7988	5.0789	0.000375976	0.00261845	Up
CGNC:51761,GeneID:422511	LOC422511	44.0377	2.59812	85.4773	32.8997	5.04	1.2e-19	5.44e-18	Up
CGNC:69630,GeneID:101750175	LOC101750175	317.589	19.4899	615.688	31.5901	4.9814	1.06e-65	2.51e-63	Up
CGNC:12277,GeneID:428650	RSAD2	12329	762.081	23896	31.3562	4.97068	8.2e-219	3.45e-215	Up
CGNC:13903,GeneID:420894	SERPINB1	113.112	7.00876	219.216	31.2774	4.96705	1.13e-42	1.56e-40	Up
CGNC:66742,GeneID:101747236	TLDC2	4.70698	0.297016	9.11695	30.6952	4.93994	0.00605435	0.0283646	Up
CGNC:52052,GeneID:423790	IFIT5	21347.5	1392.37	41302.6	29.6635	4.89062	4.25e-216	1.43e-212	Up
CGNC:50888,GeneID:418982	MMP1	24.5524	1.62249	47.4822	29.2651	4.87111	1.71e-11	4.12e-10	Up
CGNC:53614,GeneID:429283	DLX1	9.43455	0.636326	18.2328	28.6532	4.84062	4.62e-05	0.000413011	Up
CGNC:49439,GeneID:395715	SERPINB10	37.3055	2.55583	72.0552	28.1925	4.81724	0.0001856	0.00141816	Up
CGNC:8909,GeneID:417938	STRA8	14.1406	0.975636	27.3056	27.9875	4.80671	4.37e-07	5.97e-06	Up
CGNC:51266,GeneID:420486	LOC420486	23.853	1.68583	46.0203	27.2983	4.77074	1.87e-10	3.97e-09	Up
CGNC:10069,GeneID:426055	CAPSL	432.684	30.7861	834.581	27.109	4.7607	4.99e-09	8.98e-08	Up
CGNC:966,GeneID:404671	IL12B	309.431	22.076	596.787	27.0333	4.75667	0.00877131	0.03851	Up
CGNC:55760,GeneID:770082	HSPA12B	331.619	24.1695	639.069	26.4412	4.72471	1.32e-83	4.93e-81	Up
CGNC:49963,GeneID:415343	RGPD1	40.8402	3.00077	78.6797	26.2198	4.71259	1.86e-17	7.22e-16	Up
CGNC:64701,GeneID:100858381	LOC100858381	808.061	59.7777	1556.34	26.0356	4.70241	1.61e-83	5.9e-81	Up
CGNC:50142,GeneID:416036	NTN4L	209.214	15.8735	402.554	25.3602	4.66449	1.33e-62	2.99e-60	Up
CGNC:50371,GeneID:416898	FOXN4	4.41593	0.33931	8.49254	25.0289	4.64552	0.00916643	0.0398498	Up
CGNC:382,GeneID:421177	ELF3	661.797	52.2154	1271.38	24.3487	4.60577	3.91e-43	5.48e-41	Up
CGNC:51178,GeneID:420090	ACSBG2	2618.81	209.237	5028.39	24.0321	4.58689	1.73e-05	0.00016963	Up
CGNC:66067,GeneID:100857521	SLC6A14	1407.46	113.692	2701.22	23.7592	4.57042	6.46e-73	1.78e-70	Up
CGNC:49524,GeneID:395872	IL8L1	28.9456	2.35392	55.5373	23.5935	4.56032	8.24e-05	0.000687747	Up
CGNC:51321,GeneID:420706	TGM4	557.916	46.3187	1069.51	23.0903	4.52921	3.4e-105	2.04e-102	Up
CGNC:50672,GeneID:418095	DRAM1	378.351	31.4437	725.258	23.0653	4.52765	4.21e-81	1.48e-78	Up
CGNC:66472,GeneID:424409	RGS16	27.0347	2.27986	51.7895	22.7161	4.50564	0.000953627	0.0059387	Up
GeneID:107056042	LOC107056042	42.5031	3.60553	81.4006	22.5766	4.49676	1.2e-13	3.57e-12	Up
CGNC:51287,GeneID:420559	SAMD9L	353.09	30.3503	675.83	22.2676	4.47687	3.87e-28	2.81e-26	Up
GeneID:107049127	LOC107049127	200.799	17.3264	384.271	22.1783	4.47108	2.06e-34	2.05e-32	Up
CGNC:50578,GeneID:417723	CCDC146	10.3858	0.943866	19.8277	21.0069	4.39279	4.51e-05	0.000404669	Up
CGNC:51886,GeneID:423091	TRPM5	44.2203	4.02923	84.4113	20.9497	4.38886	1.81e-17	7.05e-16	Up
CGNC:51796,GeneID:422654	LOC422654	7.05152	0.64685	13.4562	20.8027	4.3787	0.00093548	0.00583868	Up
GeneID:107049309	LOC107049309	574.743	53.0572	1096.43	20.665	4.36912	3.23e-97	1.75e-94	Up
CGNC:16000,GeneID:428455	MYRIP	212.322	19.9031	404.741	20.3356	4.34593	5.69e-05	0.000498191	Up
CGNC:5410,GeneID:416630	SOCS1	977.666	92.1164	1863.22	20.2268	4.33819	3.91e-124	3.46e-121	Up
CGNC:49867,GeneID:403121	IFI27L2	1525.46	145.128	2905.79	20.0223	4.32354	3.39e-97	1.78e-94	Up
CGNC:49779,GeneID:396379	HMGCS1	2252.81	215.341	4290.29	19.9232	4.31638	2.8e-24	1.68e-22	Up
CGNC:1542,GeneID:414830	B2M	3128.18	309.848	5946.51	19.1917	4.26241	1.68e-153	2.36e-150	Up
CGNC:53176,GeneID:427727	TAP1	508.307	50.6701	965.945	19.0634	4.25273	2.61e-92	1.15e-89	Up
CGNC:49545,GeneID:395908	OASL	21031.6	2101.34	39961.9	19.0173	4.24924	1.22e-174	2.06e-171	Up
CGNC:9517,GeneID:424320	NR4A2	12.2744	1.23036	23.3184	18.9525	4.24432	3.1e-05	0.000288478	Up
CGNC:51978,GeneID:423478	LOC423478	226.564	22.7263	430.401	18.9385	4.24325	3.58e-27	2.47e-25	Up
CGNC:69568,GeneID:101750112	LOC101750112	135.072	13.6162	256.528	18.8399	4.23572	1.17e-36	1.3e-34	Up
CGNC:51253,GeneID:420413	GIMAP5	109.188	11.0499	207.325	18.7627	4.2298	1.81e-10	3.85e-09	Up
CGNC:65882,GeneID:100857114	C15ORF43	3258.47	334.051	6182.88	18.5088	4.21014	3.39e-42	4.65e-40	Up
CGNC:3912,GeneID:424467	VCAM1	2006.17	206.327	3806.01	18.4464	4.20527	1.07e-141	1.29e-138	Up
CGNC:63374,GeneID:100859777	LOC100859777	354.794	36.6667	672.921	18.3524	4.1979	5.55e-77	1.76e-74	Up
CGNC:53274,GeneID:428123	MADPRT	12.0105	1.28318	22.7379	17.72	4.14731	6.63e-05	0.000567822	Up
CGNC:52009,GeneID:423630	LL	25.1722	2.73553	47.6089	17.4039	4.12134	1.1e-07	1.64e-06	Up
CGNC:14539,GeneID:419181	TP53TG5	15.5909	1.69655	29.4852	17.3795	4.11931	8.76e-07	1.13e-05	Up
CGNC:65597,GeneID:100857422	POU3F4	5.72067	0.636326	10.805	16.9803	4.08579	0.00490578	0.0237228	Up
CGNC:349,GeneID:420057	SLC1A6	182.769	20.4983	345.039	16.8326	4.07319	5.81e-12	1.48e-10	Up
CGNC:6790,GeneID:423225	SPTBN5	1271.24	142.888	2399.59	16.7936	4.06984	7.81e-64	1.83e-61	Up
CGNC:49786,GeneID:396393	LCN8	212.56	23.94	401.18	16.7577	4.06676	1.08e-28	7.95e-27	Up
CGNC:6835,GeneID:772063	STEAP4	1244.86	140.436	2349.29	16.7286	4.06424	0.000874499	0.0054927	Up
CGNC:1014,GeneID:415303	STOML1	438.754	50.4232	827.086	16.4029	4.03588	9.29e-81	3.19e-78	Up
CGNC:49622,GeneID:396037	NKX2-6	5.52405	0.636326	10.4118	16.3623	4.03231	0.00611345	0.0285855	Up
CGNC:49613,GeneID:396025	XDH	4124.19	476.361	7772.02	16.3154	4.02816	2.01e-27	1.41e-25	Up
GeneID:107055350	LOC107055350	11.438	1.32547	21.5506	16.2588	4.02315	3.81e-05	0.000347208	Up
CGNC:64120,GeneID:100858999	LOC100858999	8.59566	0.996684	16.1946	16.2485	4.02224	0.000412775	0.00284066	Up
CGNC:1048,GeneID:768823	NEU2	99.6093	11.6217	187.597	16.142	4.01274	7.08e-06	7.67e-05	Up
CGNC:11009,GeneID:431585	C6	345.232	41.2094	649.256	15.755	3.97774	9.09e-07	1.17e-05	Up
CGNC:50115,GeneID:415922	LOC415922	2082.82	249.263	3916.37	15.7118	3.97378	1.72e-131	1.93e-128	Up
CGNC:71567,GeneID:101752158	LOC101752158	32.8275	4.00914	61.646	15.3764	3.94264	1.02e-11	2.53e-10	Up
CGNC:52896,GeneID:426826	DMBT1L	4531.24	557.215	8505.26	15.2639	3.93205	3.07e-145	3.98e-142	Up
CGNC:55756,GeneID:770077	PMAIP1	73.5287	9.11984	137.937	15.125	3.91886	3.09e-23	1.72e-21	Up
CGNC:49168,GeneID:395096	TNFRSF6B	24.7305	3.07484	46.3862	15.0857	3.91511	1.67e-09	3.19e-08	Up
CGNC:52118,GeneID:424044	STAT1	19386.2	2433.74	36338.8	14.9312	3.90026	7.51e-84	2.87e-81	Up
CGNC:13599,GeneID:422810	SOD3	271.933	34.2094	509.657	14.8981	3.89706	1.6e-05	0.000158576	Up
CGNC:53487,GeneID:428832	CYP1C1	46.8304	5.99102	87.6698	14.6335	3.87121	5.77e-16	2.1e-14	Up
CGNC:13959,GeneID:420045	KRT20	273.352	35.4256	511.279	14.4325	3.85125	7.59e-05	0.000641961	Up
CGNC:2646,GeneID:420033	KLHL10	136.351	17.6891	255.013	14.4164	3.84964	2.52e-30	2.06e-28	Up
CGNC:11177,GeneID:427224	CD274	553.361	72.5637	1034.16	14.2517	3.83307	3.5e-74	9.99e-72	Up
CGNC:4754,GeneID:396471	LECT2	103.539	13.6174	193.461	14.2069	3.82852	0.0016668	0.00952707	Up
CGNC:4020,GeneID:415996	CACNA2D3	42.1899	5.61994	78.7599	14.0144	3.80883	0.000986502	0.00609387	Up
CGNC:50067,GeneID:415756	LOC415756	533.118	71.7267	994.51	13.8653	3.7934	1.26e-23	7.29e-22	Up
CGNC:10460,GeneID:768536	TAAR1	1494.18	201.042	2787.32	13.8644	3.79331	3.7e-109	2.71e-106	Up
CGNC:10067,GeneID:426054	IL7R	119.65	16.1504	223.149	13.8169	3.78836	1.35e-05	0.000136043	Up
CGNC:53134,GeneID:427569	AC108938.5	23.6161	3.20268	44.0294	13.7477	3.78112	1.23e-08	2.07e-07	Up
CGNC:65329,GeneID:100857706	LOC100857706	108.012	14.7187	201.305	13.6768	3.77366	5.1e-30	4.02e-28	Up
CGNC:51563,GeneID:421921	CMPK2	6737.56	920.524	12554.6	13.6385	3.76962	1.42e-95	7.01e-93	Up
CGNC:1436,GeneID:419618	ZC3H12A	2336.58	319.775	4353.39	13.6139	3.76701	1.38e-23	7.95e-22	Up
CGNC:1291,GeneID:428184	SCNN1D	11.886	1.63301	22.139	13.5572	3.76099	5.71e-05	0.000499637	Up
CGNC:4755,GeneID:418247	PFKFB3	588.56	82.1916	1094.93	13.3217	3.7357	7.61e-09	1.34e-07	Up
CGNC:308,GeneID:419813	ETV7	187.935	26.2562	349.615	13.3155	3.73503	2.59e-44	3.72e-42	Up
GeneID:107052152	LOC107052152	74.7557	10.4773	139.034	13.2701	3.7301	3.28e-22	1.74e-20	Up
CGNC:55442,GeneID:769673	ERNI	26.9526	3.81796	50.0872	13.1189	3.71357	0.00018504	0.00141516	Up
CGNC:49507,GeneID:395840	AvBD2	25.321	3.60553	47.0366	13.0457	3.7055	0.00057245	0.0037997	Up
CGNC:70252,GeneID:101750812	LOC101750812	20.6991	2.94796	38.4503	13.043	3.70521	1.3e-06	1.62e-05	Up
CGNC:66277,GeneID:417379	CCDC57	36.9929	5.26991	68.7159	13.0393	3.70479	2.43e-12	6.38e-11	Up
CGNC:12320,GeneID:421945	LPIN1	1188.56	169.744	2207.37	13.0041	3.7009	1.84e-104	1.07e-101	Up
CGNC:557,GeneID:768990	TMEM173	204.647	29.2784	380.015	12.9794	3.69815	4.59e-46	7.09e-44	Up
CGNC:51250,GeneID:420407	CATH2	30.8687	4.45428	57.2832	12.8603	3.68485	1.99e-10	4.22e-09	Up
CGNC:49925,GeneID:414832	CYP3A7	2810.8	405.715	5215.89	12.8561	3.68438	0.001706	0.00970172	Up
CGNC:65027,GeneID:100858043	B3GNT4	117.662	17.0516	218.272	12.8007	3.67815	4.35e-31	3.64e-29	Up
CGNC:11684,GeneID:422884	TNIP2	944.963	138.613	1751.31	12.6346	3.6593	1.25e-21	6.26e-20	Up
CGNC:119,GeneID:429929	GADD45B	110.267	16.2568	204.277	12.5656	3.65141	5.3e-26	3.51e-24	Up
GeneID:107055430	LOC107055430	12.0307	1.7821	22.2793	12.5018	3.64406	0.000112916	0.000907696	Up
CGNC:52274,GeneID:424883	PLSCR1	2417.41	358.856	4475.97	12.4729	3.64072	2.57e-109	1.97e-106	Up
CGNC:52015,GeneID:423644	PCDH15	42.8265	6.3621	79.2909	12.463	3.63958	0.000403888	0.00278861	Up
GeneID:107055361	LOC107055361	6440.56	961.068	11920.1	12.4029	3.63261	2.07e-129	2.05e-126	Up
CGNC:1983,GeneID:396061	FASN	6417.95	958.91	11877	12.3859	3.63063	1.35e-129	1.42e-126	Up
CGNC:49163,GeneID:395072	CHIA	66.0119	9.88304	122.141	12.3586	3.62745	3.89e-06	4.42e-05	Up
CGNC:57974,GeneID:776459	PRKCQ	693.665	103.962	1283.37	12.3446	3.62581	8.27e-85	3.24e-82	Up
CGNC:49958,GeneID:415327	PATL2	399.542	59.9595	739.125	12.3271	3.62376	1.87e-07	2.7e-06	Up
GeneID:107056139	LOC107056139	255.523	38.5127	472.534	12.2696	3.61701	1.07e-17	4.28e-16	Up
CGNC:11719,GeneID:422902	SLBP	1439.13	217.426	2660.83	12.2378	3.61328	3.18e-105	1.98e-102	Up
CGNC:63949,GeneID:100859179	GNGT2	9.09522	1.38881	16.8016	12.0978	3.59668	0.000585215	0.00386917	Up
CGNC:64738,GeneID:100858343	CATH3	8.30207	1.27265	15.3315	12.0469	3.59059	0.00399541	0.0199211	Up
CGNC:15517,GeneID:419076	HPX	9424.53	1454.81	17394.2	11.9564	3.57971	3.52e-67	8.47e-65	Up
CGNC:839,GeneID:419125	SAMHD1	2610.78	403.952	4817.61	11.9262	3.57606	9.34e-76	2.86e-73	Up
CGNC:49435,GeneID:395708	LYG2	1315.89	204.549	2427.24	11.8663	3.5688	1.31e-101	7.37e-99	Up
CGNC:8422,GeneID:424185	IFIH1	3043.36	474.858	5611.86	11.818	3.56291	3.47e-33	3.28e-31	Up
CGNC:1162,GeneID:416159	ATP10B	38.7191	6.06509	71.3731	11.7679	3.55678	3.48e-10	7.26e-09	Up
CGNC:55895,GeneID:770263	SLC10A4	26.5353	4.15707	48.9136	11.7664	3.5566	7.67e-09	1.35e-07	Up
CGNC:65465,GeneID:100857563	LOC100857563	646.822	101.815	1191.83	11.7058	3.54916	3.86e-62	8.34e-60	Up
CGNC:66076,GeneID:100858173	ALPK1	79.3499	12.5018	146.198	11.6941	3.54771	3.95e-08	6.21e-07	Up
CGNC:7696,GeneID:771694	BEST4	20.2075	3.19215	37.2229	11.6607	3.54359	4.49e-07	6.11e-06	Up
CGNC:52441,GeneID:425389	BF2	3181.13	508.611	5853.65	11.5091	3.5247	7.79e-73	2.12e-70	Up
CGNC:56156,GeneID:770612	LOC770612	8021.71	1284.75	14758.7	11.4876	3.52201	4.83e-120	4.07e-117	Up
CGNC:66203,GeneID:395394	FGF19	2368.9	380.087	4357.72	11.4651	3.51917	1.29e-32	1.17e-30	Up
CGNC:66285,GeneID:417536	LOC417536	119.404	19.3338	219.475	11.3519	3.50486	4.13e-06	4.67e-05	Up
CGNC:3609,GeneID:416507	RASD1	964.166	156.251	1772.08	11.3413	3.50351	4.71e-13	1.33e-11	Up
CGNC:67816,GeneID:101748329	LOC101748329	60.1581	9.75481	110.561	11.334	3.50259	1.95e-17	7.54e-16	Up
CGNC:50175,GeneID:416147	LOC416147	2250.14	364.87	4135.42	11.3339	3.50258	3.77e-80	1.27e-77	Up
CGNC:50688,GeneID:418167	USP18	5156.67	848.087	9465.25	11.1607	3.48036	4.7e-68	1.15e-65	Up
CGNC:51328,GeneID:420728	TRANK1	7598.59	1264.03	13933.1	11.0228	3.46242	2.89e-68	7.14e-66	Up
GeneID:107049264	LOC107049264	36.8169	6.13896	67.4949	10.9945	3.45871	1.99e-06	2.39e-05	Up
CGNC:51805,GeneID:422692	TIFA	76.2279	12.7887	139.667	10.9211	3.44905	3.67e-07	5.06e-06	Up
CGNC:51661,GeneID:422224	LOC422224	355.171	59.8693	650.474	10.8649	3.4416	3.45e-35	3.59e-33	Up
CGNC:51030,GeneID:419563	LOC419563	2791.63	471.122	5112.14	10.851	3.43975	4.05e-109	2.84e-106	Up
GeneID:107050017	LOC107050017	31.2195	5.3124	57.1267	10.7534	3.42673	7.95e-10	1.59e-08	Up
CGNC:8414,GeneID:428906	BDKRB2	27.9488	4.80507	51.0926	10.6331	3.41048	1.05e-06	1.33e-05	Up
CGNC:2612,GeneID:419669	RNF19B	446.109	76.8055	815.412	10.6166	3.40825	5.23e-45	7.72e-43	Up
CGNC:66094,GeneID:100859603	TRPM6	36.7284	6.3621	67.0946	10.546	3.39862	5.21e-06	5.8e-05	Up
CGNC:5558,GeneID:420479	MAP3K8	383.781	67.1667	700.396	10.4277	3.38235	2.79e-55	5.22e-53	Up
CGNC:12363,GeneID:421981	FNDC4	91.4685	16.0228	166.914	10.4173	3.38091	1.14e-12	3.07e-11	Up
CGNC:320,GeneID:415855	SPIRE2	144.103	25.5357	262.671	10.2864	3.36267	3.79e-23	2.1e-21	Up
CGNC:51618,GeneID:422080	RNF213	7697.04	1368.76	14025.3	10.2467	3.35709	1.22e-75	3.6e-73	Up
CGNC:8390,GeneID:420628	SNX10	1182.2	213.917	2150.48	10.0529	3.32953	5.87e-87	2.35e-84	Up
CGNC:2901,GeneID:419185	RBPJL	22.3219	4.04091	40.6028	10.0479	3.32883	0.00319735	0.0165616	Up
CGNC:50277,GeneID:416523	GRAP	81.3241	14.7281	147.92	10.0434	3.32817	1.11e-20	5.35e-19	Up
CGNC:50536,GeneID:417534	CCLI10	1356.22	248.005	2464.43	9.93704	3.31282	1.32e-18	5.59e-17	Up
CGNC:56499,GeneID:771089	LOC771089	118.991	21.7696	216.212	9.93185	3.31206	2.67e-27	1.86e-25	Up
CGNC:54365,GeneID:693260	BF1	3560.76	654.292	6467.23	9.88432	3.30514	3.82e-33	3.57e-31	Up
CGNC:51929,GeneID:423233	CAPN3	10.8767	2.02514	19.7283	9.74169	3.28417	0.0014288	0.00835104	Up
CGNC:51271,GeneID:420503	ARMC3	6.66061	1.24088	12.0803	9.73529	3.28322	0.00827291	0.0367532	Up
CGNC:50493,GeneID:417345	LOC417345	253.793	47.3292	460.257	9.72458	3.28164	1.04e-09	2.03e-08	Up
CGNC:6303,GeneID:417030	SDSL	50.243	9.38508	91.1008	9.70698	3.27902	9.21e-11	2.05e-09	Up
CGNC:9977,GeneID:418198	C3AR1	82.9492	15.6517	150.247	9.59941	3.26295	1.2e-05	0.000123049	Up
CGNC:10830,GeneID:418294	C1S	8966.78	1708.05	16225.5	9.49946	3.24785	1.36e-26	9.21e-25	Up
CGNC:49887,GeneID:407777	AvBD7	21.1016	4.03038	38.1727	9.47124	3.24355	3.36e-06	3.87e-05	Up
CGNC:49473,GeneID:395779	COCH	4231.31	808.979	7653.65	9.46088	3.24197	1.02e-27	7.25e-26	Up
CGNC:4174,GeneID:428150	OGFR	1812.4	347.455	3277.35	9.43246	3.23763	4.29e-93	1.95e-90	Up
CGNC:49284,GeneID:395366	GBP	157.94	30.4355	285.445	9.37867	3.22938	3.49e-08	5.52e-07	Up
CGNC:56244,GeneID:770734	PRODH	1308.14	254.421	2361.86	9.28328	3.21464	2.08e-62	4.62e-60	Up
CGNC:210,GeneID:428201	STC1	16.8017	3.28727	30.3162	9.2223	3.20513	1.63e-05	0.000160653	Up
CGNC:7631,GeneID:421416	FOSL2	55.6774	10.923	100.432	9.19454	3.20078	2.92e-14	9.38e-13	Up
CGNC:6282,GeneID:414795	VSIG1	11.0817	2.17422	19.9892	9.19371	3.20065	0.00858416	0.0378463	Up
CGNC:49552,GeneID:395921	CNP	1339.03	264.101	2413.97	9.14032	3.19224	0.000122901	0.000981381	Up
CGNC:51762,GeneID:422513	LOC422513	4072.78	805.882	7339.67	9.10763	3.18708	1.7e-71	4.47e-69	Up
CGNC:51590,GeneID:422002	LOC422002	93.4616	18.4938	168.429	9.10735	3.18703	0.00136887	0.00807128	Up
CGNC:9480,GeneID:424314	NMI	3290.52	654.912	5926.12	9.04873	3.17772	2.27e-58	4.66e-56	Up
CGNC:49136,GeneID:378903	CREM	1000.42	200.822	1800.02	8.96325	3.16402	6.8e-22	3.51e-20	Up
CGNC:9157,GeneID:424269	PARP9	2524.52	506.789	4542.26	8.96282	3.16395	1.55e-94	7.45e-92	Up
CGNC:57828,GeneID:776306	TARP	19.3678	3.89182	34.8438	8.95307	3.16238	4.71e-06	5.29e-05	Up
GeneID:107051573	PLA2G3	61.4142	12.3863	110.442	8.91651	3.15648	3.4e-15	1.17e-13	Up
CGNC:50637,GeneID:417960	GPRC5A	424.523	85.6519	763.394	8.91276	3.15587	1.03e-46	1.64e-44	Up
CGNC:53260,GeneID:428084	GJA3	137.525	27.7614	247.288	8.90762	3.15504	0.000254244	0.0018656	Up
CGNC:272,GeneID:404303	KCNA3	19.3109	3.90235	34.7195	8.8971	3.15333	0.00227243	0.0124315	Up
GeneID:107055200	LOC107055200	17.1543	3.47865	30.83	8.86264	3.14774	2.08e-05	0.000202045	Up
CGNC:13949,GeneID:770203	WDR86	627.599	127.528	1127.67	8.84253	3.14446	5.25e-28	3.79e-26	Up
CGNC:66377,GeneID:420552	LOC420552	99.8269	20.3069	179.347	8.83182	3.14271	4.15e-22	2.19e-20	Up
CGNC:63304,GeneID:100859853	LOC100859853	287.245	58.5544	515.936	8.81124	3.13935	1.62e-18	6.8e-17	Up
CGNC:65761,GeneID:100857244	TOPAZ1	262.716	54.7406	470.692	8.59858	3.1041	1.09e-24	6.77e-23	Up
CGNC:63861,GeneID:100859272	LOC100859272	15.5487	3.2555	27.842	8.5523	3.09631	5.46e-05	0.000479235	Up
CGNC:3053,GeneID:417435	SLC16A6	715.303	150.067	1280.54	8.5331	3.09307	6.64e-05	0.00056892	Up
CGNC:4105,GeneID:424827	VAMP2	136.161	28.6513	243.671	8.50473	3.08827	4.8e-22	2.51e-20	Up
CGNC:56668,GeneID:771297	SCN4A	9.27261	1.95127	16.5939	8.50417	3.08817	0.00224231	0.0123108	Up
CGNC:53177,GeneID:427728	TAP2	1162.27	245.187	2079.36	8.4807	3.08418	2.88e-77	9.31e-75	Up
GeneID:107057583	LOC107057583	32.2301	6.82925	57.6309	8.43883	3.07704	1.44e-05	0.000143382	Up
CGNC:50447,GeneID:417131	LOC417131	92.1905	19.5741	164.807	8.41964	3.07376	6.39e-05	0.000550738	Up
CGNC:4149,GeneID:416546	NOXO1	24.828	5.28083	44.3752	8.40307	3.07092	8.69e-05	0.000721566	Up
CGNC:69325,GeneID:101749866	LRTM2	8.95475	1.9195	15.99	8.33028	3.05837	0.00637609	0.029559	Up
CGNC:10375,GeneID:770428	IL22RA2	16.4912	3.55251	29.4299	8.28425	3.05037	4.46e-05	0.000399758	Up
CGNC:66032,GeneID:100857413	NLRC5	172.932	37.3057	308.558	8.27106	3.04807	9.31e-29	6.91e-27	Up
CGNC:12701,GeneID:418812	IRG1	140.786	30.5004	251.071	8.23173	3.0412	1.47e-10	3.17e-09	Up
CGNC:66244,GeneID:415651	CX3CL1	33.5963	7.30597	59.8867	8.19696	3.03509	0.000126132	0.00100265	Up
CGNC:66284,GeneID:417535	CCLI7	23.4316	5.10017	41.763	8.18854	3.03361	7.73e-07	1.01e-05	Up
CGNC:49706,GeneID:396216	CSF3	200.387	43.8372	356.938	8.14234	3.02544	1.45e-13	4.27e-12	Up
CGNC:3147,GeneID:422996	ANO9	19.5201	4.27323	34.7669	8.13598	3.02432	0.000261474	0.00190817	Up
CGNC:10177,GeneID:420996	NR4A3	32.2128	7.06293	57.3626	8.12164	3.02177	1.61e-08	2.69e-07	Up
CGNC:66595,GeneID:548626	PTX3	130.107	28.6631	231.551	8.07837	3.01406	3.23e-18	1.33e-16	Up
CGNC:10690,GeneID:427944	CD86	14.4371	3.19215	25.6821	8.04539	3.00816	0.000169622	0.00131275	Up
CGNC:66302,GeneID:417940	TMEM140	147.382	32.7799	261.985	7.99225	2.9986	3.45e-27	2.39e-25	Up
CGNC:52639,GeneID:425998	MRGPRH	11.0025	2.47124	19.5338	7.90447	2.98267	0.00132497	0.00783945	Up
CGNC:4808,GeneID:374270	IL16	36.8113	8.27204	65.3506	7.90018	2.98188	3.13e-09	5.74e-08	Up
CGNC:2883,GeneID:419184	SDC4	1095.85	246.438	1945.25	7.89348	2.98066	5.9e-72	1.58e-69	Up
CGNC:11430,GeneID:418404	NFKBIZ	1219.46	275.968	2162.95	7.83769	2.97043	2.34e-74	6.78e-72	Up
GeneID:107053353	LOC107053353	5166.29	1175.34	9157.25	7.79115	2.96184	4.32e-91	1.86e-88	Up
CGNC:58018,GeneID:776507	LOC776507	18.2188	4.18884	32.2488	7.69875	2.94462	2.79e-05	0.000263105	Up
CGNC:64999,GeneID:100858073	UBE2L6	346.62	79.7673	613.472	7.69078	2.94313	3.98e-35	4.08e-33	Up
CGNC:1927,GeneID:419896	SCUBE3	233.203	53.7213	412.686	7.68197	2.94148	5.33e-36	5.75e-34	Up
CGNC:49525,GeneID:395873	K123	159.989	36.8611	283.117	7.68064	2.94123	1.29e-08	2.18e-07	Up
CGNC:9152,GeneID:424266	PARP14	2130.71	491.574	3769.85	7.66892	2.93902	5.91e-77	1.84e-74	Up
CGNC:17006,GeneID:419771	IL10RA	13.6865	3.2132	24.1597	7.5189	2.91052	0.00033381	0.00236491	Up
CGNC:49217,GeneID:395220	ORM1	55833.6	13162.9	98504.3	7.48347	2.90371	1.2e-56	2.3e-54	Up
GeneID:107055390	LOC107055390	52.945	12.4913	93.3987	7.4771	2.90248	3.97e-12	1.03e-10	Up
CGNC:12145,GeneID:420324	LRRC6	24.7975	5.87467	43.7203	7.44217	2.89572	1.3e-06	1.62e-05	Up
CGNC:11872,GeneID:374246	NBN	1132.47	270.704	1994.24	7.36686	2.88105	1.47e-24	8.93e-23	Up
CGNC:9179,GeneID:770943	SCTR	94.5536	22.6836	166.424	7.33673	2.87514	1.91e-18	8.02e-17	Up
CGNC:53281,GeneID:428140	MATN4	23.3812	5.60962	41.1528	7.33612	2.87502	0.000252263	0.00185349	Up
CGNC:5223,GeneID:422268	POF1B	4712.34	1135.6	8289.08	7.29932	2.86776	2.93e-15	1.02e-13	Up
CGNC:49293,GeneID:395387	MMP9	16.2743	3.92359	28.6251	7.29563	2.86703	9.94e-05	0.00081264	Up
CGNC:49770,GeneID:396364	CHRM3	21.6799	5.22897	38.1309	7.29224	2.86636	0.000662104	0.00432487	Up
CGNC:12568,GeneID:418698	MITD1	467.354	112.766	821.942	7.2889	2.8657	3.91e-50	6.78e-48	Up
GeneID:101752029	THBD	1176.22	284.128	2068.31	7.2795	2.86384	5.72e-58	1.16e-55	Up
CGNC:49508,GeneID:395841	AvBD1	30.5295	7.39171	53.6672	7.26046	2.86006	1.31e-07	1.92e-06	Up
CGNC:56580,GeneID:771186	TEX12	10.7153	2.59812	18.8326	7.24853	2.85769	0.001806	0.0101707	Up
CGNC:66365,GeneID:420189	LY96	98.9213	23.9984	173.844	7.244	2.85679	1.2e-06	1.5e-05	Up
CGNC:66079,GeneID:100858653	DHX58	343.608	83.4264	603.79	7.2374	2.85547	1.92e-29	1.47e-27	Up
CGNC:49142,GeneID:378914	CDKN1A	110.338	27.0091	193.666	7.17041	2.84205	1.44e-20	6.92e-19	Up
CGNC:14178,GeneID:772372	BDKRB1	16.7821	4.11477	29.4494	7.15699	2.83935	0.000111582	0.000897831	Up
CGNC:51365,GeneID:420896	SERPINB2	69.1507	16.9659	121.335	7.15174	2.83829	0.00219545	0.0121009	Up
CGNC:10123,GeneID:422720	TLR3	1511.73	375.006	2648.44	7.0624	2.82016	4.75e-71	1.23e-68	Up
CGNC:11893,GeneID:373960	SMYD1	189.246	46.9543	331.537	7.06085	2.81984	7.35e-30	5.76e-28	Up
GeneID:107049603	LOC107049603	13.2817	3.30851	23.2549	7.02882	2.81328	0.000522101	0.00349305	Up
CGNC:66669,GeneID:771679	CCLI8	9.04809	2.25881	15.8374	7.01138	2.8097	0.0050615	0.0243499	Up
CGNC:3115,GeneID:422992	IFITM5	85.6332	21.3886	149.878	7.00738	2.80888	7.26e-17	2.77e-15	Up
GeneID:107050978	LOC107050978	96.2493	24.0602	168.438	7.00071	2.8075	2.01e-18	8.4e-17	Up
CGNC:52216,GeneID:424548	PTGFR	116.696	29.1724	204.219	7.00043	2.80744	1.84e-16	6.96e-15	Up
CGNC:11174,GeneID:427223	RLN1	9.99984	2.50301	17.4967	6.99025	2.80534	0.00349176	0.0178004	Up
CGNC:53224,GeneID:427913	SLC41A2	234.531	58.7616	410.301	6.98247	2.80374	3.59e-33	3.37e-31	Up
CGNC:22035,GeneID:420838	CD83	148.51	37.2523	259.769	6.97323	2.80183	1.86e-06	2.25e-05	Up
CGNC:56142,GeneID:770592	MT3	1238.7	310.904	2166.5	6.96839	2.80082	2.06e-18	8.6e-17	Up
CGNC:52766,GeneID:426373	MEF2B	12.1593	3.05475	21.2639	6.96095	2.79928	0.00139488	0.0082036	Up
CGNC:57368,GeneID:772212	SELPLG	12.9512	3.2555	22.647	6.95654	2.79837	0.000716281	0.00463381	Up
CGNC:3933,GeneID:424469	LRRC39	515.823	129.796	901.85	6.94823	2.79665	2.94e-50	5.21e-48	Up
CGNC:5911,GeneID:425791	EHF	241.927	60.9205	422.934	6.94239	2.79543	3.27e-34	3.23e-32	Up
CGNC:5957,GeneID:395312	IL18	951.672	240.359	1662.99	6.91877	2.79051	2.43e-30	2e-28	Up
CGNC:53547,GeneID:429057	CFHR2	15058.7	3805.82	26311.5	6.91349	2.78941	5.29e-28	3.81e-26	Up
CGNC:50008,GeneID:415531	SLC51B	2147.63	543.164	3752.09	6.90783	2.78823	6.01e-50	1.03e-47	Up
CGNC:49337,GeneID:395472	TCIRG1	2020.54	515.377	3525.69	6.84099	2.77421	1.24e-27	8.78e-26	Up
CGNC:62566,GeneID:101749217	P2RX2	448.797	114.522	783.073	6.83775	2.77352	4.19e-22	2.21e-20	Up
CGNC:51108,GeneID:419851	LOC419851	212.88	54.3598	371.4	6.83225	2.77236	2.2e-14	7.13e-13	Up
CGNC:3698,GeneID:373928	PPARG	131.988	34.2728	229.703	6.70221	2.74464	2.93e-22	1.56e-20	Up
CGNC:50117,GeneID:415932	SEMA3DL	53.3736	13.8707	92.8766	6.69586	2.74327	4.01e-11	9.34e-10	Up
CGNC:4924,GeneID:395342	CRTAM	8.75105	2.27986	15.2222	6.67683	2.73916	0.00690454	0.0316515	Up
CGNC:10835,GeneID:396212	MT4	19916.1	5194.99	34637.2	6.66742	2.73713	2.26e-15	7.92e-14	Up
CGNC:13750,GeneID:418867	PHF11	799.749	209.015	1390.48	6.65256	2.73391	5.11e-57	1e-54	Up
CGNC:3824,GeneID:424805	SERPINE2	2286.97	599.92	3974.02	6.62425	2.72776	0.000231047	0.00171558	Up
GeneID:107055625	LOC107055625	15.9006	4.17831	27.6229	6.61103	2.72487	0.00024373	0.0017955	Up
CGNC:1956,GeneID:426846	LIPG	136.628	35.9289	237.326	6.60544	2.72365	1.19e-21	6.02e-20	Up
CGNC:49947,GeneID:415302	PML	930.309	245.021	1615.6	6.5937	2.72109	1.2e-59	2.53e-57	Up
CGNC:64661,GeneID:100858424	IL34	106.305	28.0362	184.574	6.58343	2.71884	7.3e-19	3.15e-17	Up
CGNC:2041,GeneID:420011	IFI35	3279.16	865.696	5692.62	6.57577	2.71716	1.2e-75	3.6e-73	Up
CGNC:49936,GeneID:414877	AvBD13	499.422	132.141	866.702	6.55892	2.71346	1.11e-09	2.16e-08	Up
CGNC:49283,GeneID:395364	PIT54	243734	64723.9	422745	6.53152	2.70742	3.46e-30	2.8e-28	Up
CGNC:4895,GeneID:769528	GRAMD1B	796.202	211.551	1380.85	6.52727	2.70648	1.04e-56	2e-54	Up
CGNC:65165,GeneID:100857899	TTC25	14.6196	3.89182	25.3474	6.51299	2.70332	0.00046822	0.00317037	Up
CGNC:50031,GeneID:415634	GPR114	17.3227	4.61274	30.0327	6.51083	2.70284	0.000122284	0.000978334	Up
CGNC:49912,GeneID:414337	CATH1	29.8187	7.95397	51.6834	6.49781	2.69995	7.04e-07	9.25e-06	Up
CGNC:6614,GeneID:417747	ZNF800	816.757	217.924	1415.59	6.4958	2.69951	3.5e-20	1.64e-18	Up
CGNC:50953,GeneID:419265	HELZ2	6438	1718.65	11157.4	6.49193	2.69865	5e-30	3.97e-28	Up
CGNC:9694,GeneID:418100	PARP12	1747.36	470.447	3024.27	6.42849	2.68448	3e-52	5.43e-50	Up
CGNC:65064,GeneID:100858003	TTC31	1186.02	319.622	2052.41	6.42137	2.68288	3.52e-62	7.7e-60	Up
CGNC:52077,GeneID:423899	NRAP	9.93605	2.68251	17.1896	6.40801	2.67988	0.00395665	0.019775	Up
CGNC:8731,GeneID:420667	CMTM6	125.377	33.8584	216.896	6.40597	2.67942	8.17e-21	3.99e-19	Up
CGNC:50789,GeneID:418554	LOC418554	62.1406	16.7965	107.485	6.39923	2.6779	8.26e-07	1.07e-05	Up
CGNC:8290,GeneID:428753	PRKG2	92.8237	25.0905	160.557	6.3991	2.67787	2.96e-08	4.74e-07	Up
GeneID:107049468	LOC107049468	83.7561	22.8308	144.681	6.33713	2.66383	1.53e-07	2.23e-06	Up
CGNC:51439,GeneID:421219	TLR15	23.9496	6.54276	41.3565	6.32095	2.66014	8.48e-06	9.01e-05	Up
CGNC:9502,GeneID:771315	CSF2RB	142.091	39.0677	245.115	6.2741	2.64941	5.03e-22	2.62e-20	Up
CGNC:2156,GeneID:425954	SLC2A6	107.06	29.4581	184.662	6.26862	2.64815	6.72e-08	1.02e-06	Up
CGNC:4487,GeneID:417678	SLC13A5	451.786	124.403	779.17	6.2633	2.64692	7.3e-43	1.02e-40	Up
CGNC:52892,GeneID:426820	LOC426820	7178.4	1978.47	12378.3	6.25654	2.64536	2.25e-40	2.87e-38	Up
CGNC:70209,GeneID:101750767	LOC101750767	656.485	181.832	1131.14	6.2208	2.6371	1.7e-48	2.81e-46	Up
CGNC:4877,GeneID:424862	SLCO2A1	1922.87	538.52	3307.22	6.14131	2.61855	3.96e-34	3.89e-32	Up
CGNC:50822,GeneID:418667	LOC418667	12.9773	3.64762	22.307	6.11548	2.61247	0.001415	0.00829544	Up
CGNC:51239,GeneID:420368	LOC420368	116.788	32.8629	200.714	6.10761	2.61061	7.19e-19	3.11e-17	Up
CGNC:52992,GeneID:427122	ERAP1	3308.97	935.3	5682.64	6.07574	2.60306	1.13e-70	2.89e-68	Up
CGNC:61457,GeneID:100359387	CARNS1	18.4404	5.21729	31.6634	6.06894	2.60144	0.000127586	0.00101209	Up
CGNC:3057,GeneID:423695	SRGN	9.22827	2.61917	15.8374	6.04672	2.59615	0.0075045	0.0339032	Up
CGNC:10985,GeneID:421057	SMCHD1	2885.18	819.337	4951.03	6.04272	2.5952	8.46e-58	1.68e-55	Up
CGNC:2335,GeneID:419914	TSPO2	1627.11	462.453	2791.77	6.03687	2.5938	4.32e-18	1.76e-16	Up
GeneID:107051505	LOC107051505	18.572	5.28063	31.8633	6.034	2.59311	0.000122852	0.000981381	Up
CGNC:9464,GeneID:427908	C1QTNF6	805.551	229.139	1381.96	6.03112	2.59243	9.83e-49	1.64e-46	Up
CGNC:10374,GeneID:396409	PTPN2	2817.85	801.69	4834.02	6.02978	2.59211	4.84e-31	4.03e-29	Up
CGNC:64025,GeneID:100859097	LOC100859097	76.0017	21.8978	130.106	5.94149	2.57082	1.85e-13	5.37e-12	Up
CGNC:51182,GeneID:420107	LOC420107	20.1665	5.81132	34.5217	5.94042	2.57057	8.19e-05	0.000683683	Up
CGNC:71182,GeneID:101751764	LOC101751764	120.898	34.8746	206.922	5.93331	2.56884	2.32e-19	1.03e-17	Up
GeneID:107057238	LOC107057238	21.8552	6.30929	37.401	5.92794	2.56753	3.22e-05	0.000298795	Up
CGNC:494,GeneID:425657	CTSS	939.31	271.31	1607.31	5.92426	2.56664	5.73e-34	5.54e-32	Up
CGNC:65057,GeneID:100858010	A2ML4	53748.8	15538.6	91959	5.9181	2.56514	1.67e-19	7.55e-18	Up
CGNC:66881,GeneID:101747378	LOC101747378	6113.35	1777.57	10449.1	5.87832	2.5554	3.81e-29	2.88e-27	Up
CGNC:3849,GeneID:424807	AP1S3	715.374	209.227	1221.52	5.83826	2.54554	3.01e-24	1.8e-22	Up
CGNC:49227,GeneID:395243	IRF9	313.988	91.868	536.108	5.83563	2.54489	1.06e-33	1.01e-31	Up
CGNC:12743,GeneID:418845	SLC25A30	619.989	182.349	1057.63	5.80002	2.53606	4.52e-39	5.32e-37	Up
CGNC:9356,GeneID:693250	H1F0	1743.32	513.042	2973.61	5.79603	2.53507	8.68e-36	9.25e-34	Up
CGNC:56231,GeneID:770718	LOC770718	233.282	68.7817	397.782	5.78325	2.53188	2.66e-13	7.72e-12	Up
CGNC:11994,GeneID:427984	KCNJ15	70.2675	20.965	119.57	5.7033	2.5118	3.9e-12	1.01e-10	Up
CGNC:52063,GeneID:423849	LOC423849	130.077	38.8535	221.301	5.69578	2.50989	1.78e-17	6.95e-16	Up
CGNC:3566,GeneID:416884	TRAFD1	1953.53	583.627	3323.44	5.69446	2.50956	1.82e-61	3.88e-59	Up
CGNC:11860,GeneID:420215	RIPK2	428.109	128.201	728.018	5.67874	2.50557	1.67e-06	2.04e-05	Up
CGNC:2536,GeneID:395977	GFI1B	136.885	41.0817	232.689	5.66405	2.50183	1.07e-19	4.86e-18	Up
CGNC:49004,GeneID:374012	BIRC2	7271.67	2190.48	12352.9	5.63933	2.49552	1.01e-32	9.28e-31	Up
CGNC:66362,GeneID:420067	PRAM1	18.8573	5.72674	31.9879	5.58572	2.48174	0.000228839	0.00170444	Up
CGNC:50302,GeneID:416633	LOC416633	22.0858	6.75519	37.4164	5.53891	2.4696	6.67e-05	0.000571158	Up
CGNC:53016,GeneID:427201	LOC427201	408.184	125.047	691.322	5.52852	2.46689	1.75e-25	1.13e-23	Up
CGNC:4190,GeneID:396242	COL9A3	30.3941	9.32058	51.4676	5.52193	2.46517	2.22e-06	2.66e-05	Up
CGNC:7714,GeneID:421434	CMTR1	3697.11	1135.39	6258.82	5.51247	2.4627	1.92e-46	2.99e-44	Up
CGNC:50823,GeneID:418668	LOC418668	2144.54	658.974	3630.1	5.50871	2.46172	3.66e-50	6.42e-48	Up
CGNC:71609,GeneID:101752200	LOC101752200	18.4256	5.68444	31.1668	5.48282	2.45492	0.000310011	0.00221872	Up
CGNC:66265,GeneID:416699	LRGUK	10.1769	3.14986	17.204	5.46182	2.44938	0.00843525	0.0373561	Up
CGNC:50457,GeneID:417185	ASS1	424.151	132.198	716.104	5.41692	2.43747	1.99e-36	2.2e-34	Up
CGNC:8018,GeneID:395147	EIF2AK2	1753.17	548.194	2958.14	5.39615	2.43193	2e-44	2.9e-42	Up
CGNC:5120,GeneID:396384	IRF1	1419.18	444.617	2393.75	5.38384	2.42864	1.19e-16	4.51e-15	Up
CGNC:52008,GeneID:423629	LOC423629	3621.91	1139.78	6104.04	5.35546	2.42101	2.55e-26	1.71e-24	Up
CGNC:63764,GeneID:100859374	LOC100859374	21.4326	6.77528	36.0899	5.3267	2.41324	7.91e-05	0.000664483	Up
CGNC:2580,GeneID:419932	BTG2	4243.52	1342.26	7144.79	5.32296	2.41223	2.29e-37	2.59e-35	Up
CGNC:49845,GeneID:396512	FOS	208.418	66.0188	350.816	5.31388	2.40977	3.99e-07	5.48e-06	Up
CGNC:64350,GeneID:100858751	LOC100858751	407.27	129.024	685.516	5.31309	2.40955	9.98e-11	2.2e-09	Up
CGNC:4100,GeneID:424826	PIK3CB	1030.52	328.023	1733.02	5.28323	2.40142	3.06e-41	4.05e-39	Up
CGNC:9884,GeneID:373965	CALD1	5528.12	1762.5	9293.73	5.27305	2.39864	8.12e-63	1.85e-60	Up
CGNC:49404,GeneID:395615	SHH	106.681	34.0678	179.293	5.26285	2.39584	1.47e-05	0.00014634	Up
CGNC:9120,GeneID:421600	PRRG4	64.379	20.6361	108.122	5.23946	2.38942	1.09e-10	2.41e-09	Up
CGNC:1113,GeneID:419873	PPM1J	259.591	83.3913	435.79	5.22584	2.38566	1.2e-27	8.5e-26	Up
CGNC:52081,GeneID:423919	LOC423919	593.726	192.383	995.069	5.17233	2.37081	6.78e-40	8.45e-38	Up
CGNC:10414,GeneID:378783	KIT	76.1174	24.7068	127.528	5.16165	2.36783	4.94e-12	1.26e-10	Up
CGNC:66162,GeneID:100859797	ACKR4	267.821	86.9772	448.665	5.15842	2.36693	1.28e-05	0.000130221	Up
CGNC:3608,GeneID:419218	ZNFX1	6346.69	2062.74	10630.6	5.15366	2.3656	2.14e-17	8.24e-16	Up
CGNC:49401,GeneID:395612	GSTA4	341.953	111.715	572.191	5.12188	2.35667	2.37e-23	1.32e-21	Up
CGNC:53449,GeneID:428744	ARHGEF38	37.7517	12.3539	63.1496	5.11172	2.35381	5.95e-07	7.95e-06	Up
CGNC:66403,GeneID:421369	ATF3	258.885	84.8829	432.888	5.09982	2.35045	1.13e-08	1.92e-07	Up
CGNC:14468,GeneID:770108	STARD5	320.93	105.499	536.362	5.08405	2.34598	2.98e-30	2.42e-28	Up
CGNC:57485,GeneID:772360	LOC772360	113.494	37.3361	189.652	5.0796	2.34471	0.00010248	0.000833352	Up
CGNC:5136,GeneID:424524	ODF2L	16.6326	5.47201	27.7931	5.07914	2.34458	0.000971042	0.00602046	Up
CGNC:49781,GeneID:396382	ISL2	26.4343	8.73899	44.1296	5.04974	2.33621	0.00054579	0.00363421	Up
CGNC:3259,GeneID:395090	TNFRSF8	36.0992	11.9514	60.247	5.04098	2.33371	1.48e-06	1.82e-05	Up
CGNC:49153,GeneID:386574	NFKB2	600.655	199.008	1002.3	5.03648	2.33242	1.4e-39	1.72e-37	Up
CGNC:5421,GeneID:417247	TNFSF15	27.0749	9.00348	45.1463	5.01432	2.32605	2.83e-05	0.00026676	Up
CGNC:11850,GeneID:418496	EVA1C	41.7857	13.946	69.6254	4.99252	2.31977	3.43e-07	4.74e-06	Up
CGNC:4801,GeneID:423789	LIPA	1430.29	477.454	2383.13	4.99132	2.31942	4.86e-49	8.18e-47	Up
CGNC:66306,GeneID:418108	ZC3HAV1L	375.337	125.428	625.247	4.98492	2.31757	9.02e-32	7.87e-30	Up
CGNC:51575,GeneID:421954	NT5C1B	468.503	156.571	780.435	4.98456	2.31747	9.7e-35	9.72e-33	Up
CGNC:69112,GeneID:101749651	LOC101749651	347.634	116.335	578.933	4.97645	2.31512	2.04e-14	6.64e-13	Up
CGNC:49371,GeneID:395550	LY6E	25217.6	8441.64	41993.6	4.97458	2.31457	2.81e-63	6.47e-61	Up
CGNC:51112,GeneID:419872	MOV10	3706.65	1243	6170.3	4.96403	2.31151	6.12e-58	1.23e-55	Up
CGNC:71259,GeneID:101751844	LOC101751844	26.6636	8.9497	44.3774	4.95854	2.30991	2.66e-05	0.000252729	Up
CGNC:10056,GeneID:430480	IKBKE	405.65	136.356	674.944	4.94988	2.30739	1.61e-08	2.69e-07	Up
CGNC:5405,GeneID:416069	FAM3D	43.2425	14.6326	71.8523	4.91043	2.29585	0.00305207	0.0159452	Up
CGNC:6397,GeneID:416693	NET1	1419.41	484.291	2354.52	4.86179	2.28149	2.55e-20	1.2e-18	Up
CGNC:65132,GeneID:100857932	LOC100857932	305.325	104.322	506.329	4.85352	2.27903	9.51e-13	2.59e-11	Up
CGNC:64882,GeneID:100858196	LOC100858196	19.7813	6.76571	32.7969	4.84751	2.27725	0.000436179	0.002981	Up
CGNC:9875,GeneID:420935	ADCY2	64.301	22.0689	106.533	4.82729	2.27121	0.000148466	0.00116077	Up
CGNC:70068,GeneID:101750621	LOC101750621	55.7565	19.2467	92.2664	4.79388	2.2612	1.8e-07	2.6e-06	Up
CGNC:66220,GeneID:396093	NFKBIA	1789.42	618.416	2960.42	4.7871	2.25915	4.7e-23	2.57e-21	Up
CGNC:1424,GeneID:769024	GPR17	33.001	11.4535	54.5486	4.76262	2.25176	0.00098076	0.00606507	Up
CGNC:66201,GeneID:395299	SOCS3	767.616	266.929	1268.3	4.75147	2.24837	3.69e-07	5.08e-06	Up
CGNC:889,GeneID:419401	TMEM52	17.0127	5.91696	28.1084	4.75047	2.24807	0.00113515	0.00685364	Up
CGNC:1331,GeneID:419424	TNFRSF18	84.5931	29.4895	139.697	4.73717	2.24402	0.00181072	0.0101905	Up
CGNC:2160,GeneID:417561	SERPINF1	1978.37	690.138	3266.6	4.73326	2.24283	6.19e-13	1.73e-11	Up
CGNC:50430,GeneID:427746	YF5	96.0768	33.5294	158.624	4.73089	2.24211	4.13e-13	1.17e-11	Up
CGNC:51335,GeneID:420747	RP9	579.125	202.873	955.377	4.70923	2.23549	1.2e-25	7.83e-24	Up
CGNC:7902,GeneID:101749627	P2RY14	30.5726	10.7538	50.3915	4.68592	2.22833	2.17e-05	0.000209571	Up
CGNC:6419,GeneID:423885	SORCS1	75.194	26.5536	123.834	4.66356	2.22143	0.000132461	0.00104879	Up
CGNC:57042,GeneID:771782	RAB7B	122.431	43.2619	201.601	4.66002	2.22034	1.14e-10	2.5e-09	Up
CGNC:49879,GeneID:404754	UMOD	14.8472	5.25002	24.4443	4.65604	2.2191	0.00344378	0.0176252	Up
CGNC:10946,GeneID:418310	STYK1	218.428	77.2931	359.563	4.65194	2.21783	2.46e-20	1.16e-18	Up
CGNC:7889,GeneID:771938	ESRRB	11.8101	4.18884	19.4314	4.63886	2.21377	0.00799424	0.0356942	Up
CGNC:9155,GeneID:424267	DTX3L	1715.6	609.453	2821.75	4.62997	2.211	8.96e-30	6.99e-28	Up
CGNC:8425,GeneID:424700	PDE4B	797.405	283.534	1311.28	4.62477	2.20938	6.46e-34	6.21e-32	Up
CGNC:6070,GeneID:417048	TAPBP	1430.25	511.005	2349.5	4.59781	2.20095	1.82e-46	2.86e-44	Up
CGNC:6509,GeneID:423890	DUSP5	211.071	75.5508	346.591	4.58752	2.19772	5.43e-14	1.7e-12	Up
CGNC:49309,GeneID:395417	SIK1	581.819	208.299	955.339	4.58639	2.19736	4.21e-09	7.63e-08	Up
CGNC:63875,GeneID:100859257	P2RY11	38.0234	13.6996	62.3472	4.55101	2.18619	1.93e-06	2.33e-05	Up
CGNC:51276,GeneID:420526	FAM188A	1159.69	418.842	1900.54	4.5376	2.18193	9.96e-44	1.42e-41	Up
CGNC:8763,GeneID:417926	APAF1	1369.89	495.093	2244.68	4.53386	2.18074	4.71e-45	7.02e-43	Up
CGNC:9534,GeneID:418060	ISX	42.7922	15.4817	70.1027	4.52809	2.1789	6.5e-07	8.58e-06	Up
CGNC:49280,GeneID:395354	CBX4	483.616	174.967	792.265	4.52808	2.1789	1.37e-31	1.18e-29	Up
CGNC:8663,GeneID:422624	SARAF	1907.39	697.113	3117.66	4.47225	2.161	9.37e-33	8.66e-31	Up
CGNC:2234,GeneID:417398	TMEM100	206.875	75.6406	338.11	4.46995	2.16026	5.5e-14	1.71e-12	Up
CGNC:11038,GeneID:395278	GJA1	1255.35	459.095	2051.6	4.4688	2.15989	1.29e-11	3.17e-10	Up
CGNC:1563,GeneID:386580	PTPRC	202.629	74.6316	330.626	4.43011	2.14734	4.18e-20	1.94e-18	Up
CGNC:9191,GeneID:395488	MARCO	719.906	265.764	1174.05	4.41763	2.14327	1.56e-21	7.77e-20	Up
CGNC:51635,GeneID:422150	LOC422150	12.1152	4.48585	19.7446	4.40152	2.138	0.00930477	0.0403782	Up
CGNC:4214,GeneID:395105	CRHR2	948.194	351.489	1544.9	4.39529	2.13596	3.47e-40	4.36e-38	Up
CGNC:879,GeneID:419400	C21H1ORF222	148.048	54.9295	241.167	4.39049	2.13438	1.52e-15	5.4e-14	Up
CGNC:6492,GeneID:423888	MXI1	896.11	332.519	1459.7	4.38982	2.13416	3.28e-39	3.92e-37	Up
CGNC:49707,GeneID:396221	LDHA	28614	10628.2	46599.8	4.38453	2.13242	7.83e-56	1.48e-53	Up
CGNC:55722,GeneID:770026	LOC770026	68.8917	25.7037	112.08	4.36045	2.12448	1.77e-09	3.37e-08	Up
CGNC:50728,GeneID:418295	C1R	7340.63	2746.84	11934.4	4.34479	2.11929	2.85e-36	3.12e-34	Up
CGNC:5325,GeneID:416065	PXK	1037.06	388.201	1685.93	4.34292	2.11867	2.14e-40	2.75e-38	Up
CGNC:1052,GeneID:419993	CALCOCO2	2969.9	1114.17	4825.62	4.33114	2.11475	2.54e-48	4.15e-46	Up
CGNC:51029,GeneID:419558	SERINC2	156.211	58.8554	253.567	4.30831	2.10712	2.73e-16	1.01e-14	Up
CGNC:66469,GeneID:424312	RND3	1237.24	466.836	2007.65	4.30054	2.10452	2.72e-06	3.2e-05	Up
CGNC:49433,GeneID:395695	AKAP9	2902.86	1097.18	4708.53	4.2915	2.10148	8.82e-48	1.43e-45	Up
CGNC:67729,GeneID:101748239	LOC101748239	80.1085	30.2851	129.932	4.2903	2.10108	0.000330775	0.00234835	Up
CGNC:10784,GeneID:422828	BST1	1023.97	388.566	1659.38	4.27051	2.09441	1.18e-12	3.18e-11	Up
CGNC:64367,GeneID:100858732	STAT2	929.667	353.129	1506.21	4.26531	2.09265	8.45e-23	4.59e-21	Up
CGNC:16367,GeneID:415454	HDC	24.3156	9.2779	39.3532	4.24161	2.08461	0.000236879	0.00175347	Up
CGNC:10370,GeneID:421684	TNFAIP3	232.22	88.6667	375.774	4.23805	2.0834	7.65e-08	1.15e-06	Up
CGNC:49637,GeneID:396069	GLRX	201.728	77.0411	326.415	4.23689	2.08301	1.34e-11	3.29e-10	Up
CGNC:11770,GeneID:421817	PNRC1	6769.06	2586.51	10951.6	4.23412	2.08206	3.49e-38	4.03e-36	Up
CGNC:52679,GeneID:426106	LOC426106	41.8194	16.0136	67.6252	4.22299	2.07826	3.27e-06	3.78e-05	Up
CGNC:5004,GeneID:418647	TMEM243	66.4811	25.503	107.459	4.2136	2.07505	6.65e-09	1.18e-07	Up
CGNC:8237,GeneID:424668	C8H1ORF168	1837.87	705.793	2969.94	4.20795	2.07312	1.95e-11	4.64e-10	Up
CGNC:50204,GeneID:416235	SPINK5	125697	48284.4	203110	4.20654	2.07263	3.51e-53	6.42e-51	Up
CGNC:11391,GeneID:427279	LNPEP	1140.45	438.263	1842.63	4.2044	2.0719	1.91e-39	2.32e-37	Up
CGNC:63993,GeneID:100859134	LOC100859134	69.1706	26.5844	111.757	4.20385	2.07171	2.95e-08	4.73e-07	Up
CGNC:12403,GeneID:418624	PIGA	487.598	187.443	787.753	4.20262	2.07129	1.97e-26	1.33e-24	Up
CGNC:8526,GeneID:423457	SLC25A47	258.993	99.5949	418.39	4.20092	2.07071	8.89e-22	4.54e-20	Up
CGNC:65111,GeneID:100857954	MPEG1	575.573	222.182	928.964	4.18109	2.06388	1.54e-31	1.33e-29	Up
CGNC:49018,GeneID:374044	HK2	642.074	248.285	1035.86	4.17208	2.06077	5.82e-33	5.41e-31	Up
CGNC:49047,GeneID:374111	CELF2	134.532	52.0725	216.992	4.16712	2.05905	7.02e-14	2.16e-12	Up
CGNC:66141,GeneID:100858838	PIM1	357.219	138.397	576.041	4.16223	2.05736	1.79e-25	1.16e-23	Up
CGNC:53738,GeneID:429681	GIMAP1	243.475	94.4281	392.521	4.15682	2.05548	5.91e-21	2.9e-19	Up
CGNC:541,GeneID:419844	RASSF5	128.839	49.9784	207.7	4.1558	2.05513	2.95e-06	3.44e-05	Up
CGNC:50861,GeneID:418825	PCDH17	57.238	22.3345	92.1414	4.12551	2.04457	1.43e-07	2.08e-06	Up
CGNC:52020,GeneID:423668	RSFR	69.0608	26.9766	111.145	4.12006	2.04267	5.76e-09	1.03e-07	Up
CGNC:12313,GeneID:421939	ATP6V1C2	41.481	16.2457	66.7162	4.1067	2.03798	4.44e-06	5.01e-05	Up
CGNC:4745,GeneID:416585	IL4R	485.622	190.395	780.85	4.10122	2.03605	4.03e-21	1.99e-19	Up
CGNC:50634,GeneID:417956	HIST1H2B7	14.0413	5.52483	22.5578	4.08299	2.02962	0.00712773	0.0324712	Up
CGNC:8761,GeneID:422641	NAAA	93.8645	36.9985	150.73	4.07396	2.02643	6.64e-11	1.5e-09	Up
CGNC:66335,GeneID:419112	LOC419112	34.4138	13.5837	55.244	4.06694	2.02394	2.34e-05	0.000224603	Up
CGNC:12645,GeneID:374229	TNFSF13B	48.4417	19.2034	77.6799	4.0451	2.01618	1.54e-06	1.88e-05	Up
CGNC:10731,GeneID:426340	TAPBPL	206.904	82.1945	331.614	4.03451	2.01239	3.25e-18	1.34e-16	Up
CGNC:49465,GeneID:395764	CASP1	625.19	248.661	1001.72	4.02845	2.01023	1.93e-31	1.65e-29	Up
CGNC:66235,GeneID:415336	LOC415336	1007.14	400.59	1613.68	4.02827	2.01016	1.16e-29	8.95e-28	Up
CGNC:49917,GeneID:414343	AvBD9	14493.7	5771.27	23216.1	4.0227	2.00816	1.23e-13	3.65e-12	Up
GeneID:107050538	LOC107050538	27.528	10.9653	44.0908	4.02095	2.00754	0.000203263	0.00153473	Up
CGNC:801,GeneID:395925	KCNJ5	90.6646	36.1383	145.191	4.01765	2.00635	1.28e-08	2.16e-07	Up
CGNC:20,GeneID:429301	WFIKKN1	89.195	142.763	35.627	0.249554	-2.00258	0.000960748	0.00596983	Down
CGNC:69967,GeneID:101750517	LOC101750517	17.9192	28.7043	7.13411	0.248538	-2.00846	0.00252532	0.0135637	Down
CGNC:52940,GeneID:426940	BG1	14.27	22.8616	5.67835	0.24838	-2.00938	0.00796982	0.035604	Down
CGNC:10848,GeneID:396045	GLI1	134.537	215.586	53.4876	0.248103	-2.01099	8.24e-14	2.5e-12	Down
CGNC:14669,GeneID:769963	PAFAH2	220.791	353.826	87.7548	0.248017	-2.01149	1.34e-09	2.59e-08	Down
CGNC:8327,GeneID:417877	PPFIA2	20.3707	32.6524	8.08909	0.247734	-2.01314	0.00102553	0.00628921	Down
CGNC:7757,GeneID:427868	TRHDE	805.448	1291.39	319.503	0.24741	-2.01502	5.31e-34	5.17e-32	Down
CGNC:135,GeneID:396353	NREP	2107.58	3382.46	832.698	0.246181	-2.02221	2.9e-12	7.57e-11	Down
CGNC:12069,GeneID:418528	TMPRSS2	370.448	594.584	146.311	0.246074	-2.02284	2.07e-25	1.33e-23	Down
CGNC:5931,GeneID:424048	DNAH7	20.2426	32.4914	7.99385	0.24603	-2.0231	0.00124275	0.00740242	Down
CGNC:5947,GeneID:416101	CNTN3	14.64	23.5094	5.77056	0.245458	-2.02645	0.00567768	0.0268991	Down
CGNC:51296,GeneID:420599	HDAC9	478.681	768.689	188.674	0.245448	-2.02651	2.71e-28	1.97e-26	Down
CGNC:52422,GeneID:425328	PPP1R3C	154.571	248.721	60.4198	0.242922	-2.04144	1.81e-15	6.4e-14	Down
CGNC:64405,GeneID:100858693	LOC100858693	830.282	1336.04	324.521	0.242897	-2.04158	2.32e-35	2.44e-33	Down
CGNC:51706,GeneID:422323	LOC422323	13.8341	22.2919	5.37638	0.241181	-2.05181	0.00598753	0.028106	Down
CGNC:49068,GeneID:374169	CACNA1B	44.2287	71.281	17.1763	0.240966	-2.0531	1.7e-06	2.07e-05	Down
CGNC:2485,GeneID:416826	CDK2AP1	106.623	171.924	41.3209	0.240343	-2.05683	7.42e-06	7.98e-05	Down
CGNC:1143,GeneID:426922	RNF122	20.9076	33.7126	8.10252	0.240341	-2.05685	0.000711284	0.00460856	Down
CGNC:10472,GeneID:421709	LAMA2	48.224	77.7851	18.6629	0.239929	-2.05932	3.44e-05	0.000316605	Down
CGNC:52114,GeneID:424025	TRPM8	188.373	303.851	72.8957	0.239906	-2.05946	4.55e-18	1.85e-16	Down
CGNC:51277,GeneID:420534	ABCB1LA	271.659	438.321	104.996	0.239542	-2.06165	4.91e-09	8.83e-08	Down
CGNC:66182,GeneID:374039	OGN	109.186	176.446	41.9258	0.237612	-2.07332	0.000755366	0.00485421	Down
CGNC:8991,GeneID:423516	SYT16	100.424	162.311	38.5366	0.237425	-2.07446	4.34e-12	1.12e-10	Down
CGNC:65289,GeneID:100857767	FOXO6	20.1226	32.5236	7.7216	0.237415	-2.07451	0.000949636	0.00592045	Down
CGNC:69305,GeneID:101749846	LOC101749846	653.358	1056.37	250.347	0.236988	-2.07711	2.98e-23	1.66e-21	Down
CGNC:52552,GeneID:425719	TM6SF2	357.988	578.834	137.142	0.236928	-2.07748	5.81e-26	3.82e-24	Down
CGNC:57022,GeneID:771752	C8ORF48	29.9351	48.408	11.4622	0.236783	-2.07836	5.94e-05	0.000516002	Down
GeneID:107054804	TUSC5	92.0455	149.053	35.0376	0.235068	-2.08885	2.23e-10	4.69e-09	Down
CGNC:12322,GeneID:421946	FAM84A	985.151	1596.28	374.017	0.234305	-2.09354	7.91e-17	3.01e-15	Down
CGNC:3030,GeneID:396080	SPP2	30289.1	49121.8	11456.5	0.233226	-2.1002	2.22e-24	1.34e-22	Down
CGNC:5255,GeneID:416966	C12ORF43	1410.63	2288.04	533.216	0.233045	-2.10132	2.42e-32	2.15e-30	Down
CGNC:1764,GeneID:419438	SLC2A5	705.224	1145.04	265.407	0.231788	-2.10912	1.92e-08	3.16e-07	Down
CGNC:5551,GeneID:415530	RASL12	50.0619	81.3015	18.8223	0.231513	-2.11083	2.32e-07	3.29e-06	Down
CGNC:50208,GeneID:416249	HAVCR1	80.4084	130.601	30.216	0.231361	-2.11178	4.74e-06	5.32e-05	Down
CGNC:10951,GeneID:418311	HAO2	463.561	753.214	173.909	0.230889	-2.11473	9.65e-20	4.4e-18	Down
CGNC:8353,GeneID:417881	SLC6A15	23.5399	38.2524	8.82728	0.230764	-2.11551	0.00129764	0.00769936	Down
CGNC:9279,GeneID:771364	CBY1	26.9826	43.8584	10.1068	0.230441	-2.11753	0.000105114	0.000851595	Down
CGNC:4177,GeneID:423756	PITX3	116.901	190.061	43.7413	0.230144	-2.11939	1.93e-06	2.33e-05	Down
CGNC:6527,GeneID:424956	AHSG	13713	22295.7	5130.27	0.230102	-2.11965	3.79e-41	4.98e-39	Down
CGNC:49616,GeneID:396030	BMPR1B	67.9339	110.521	25.3464	0.229335	-2.12447	3.24e-09	5.94e-08	Down
CGNC:7655,GeneID:374011	MAB21L2	219.875	357.798	81.9511	0.229043	-2.12631	0.00097689	0.00604781	Down
CGNC:52775,GeneID:426399	TP53I11	310.227	505.161	115.293	0.22823	-2.13144	2.65e-25	1.69e-23	Down
CGNC:15708,GeneID:418705	AFF3	16.485	26.9036	6.0663	0.225482	-2.14891	0.0019562	0.0108999	Down
CGNC:12525,GeneID:422057	RCAN2	145.408	237.338	53.4779	0.225323	-2.14993	3.52e-16	1.3e-14	Down
CGNC:12356,GeneID:395254	FKBP1B	58.3524	95.2507	21.4542	0.225239	-2.15047	1.86e-06	2.25e-05	Down
CGNC:4968,GeneID:769750	LRRC75B	25.6637	41.9075	9.41988	0.224778	-2.15343	0.000124399	0.000991014	Down
GeneID:107055351	REEP6	47.3493	77.3715	17.327	0.223946	-2.15878	0.00047857	0.00323266	Down
CGNC:49474,GeneID:395780	APOA4	745.241	1217.78	272.698	0.22393	-2.15888	0.00370742	0.0187072	Down
CGNC:10233,GeneID:428609	NOX3	116.241	190.055	42.4279	0.22324	-2.16333	3.65e-14	1.16e-12	Down
GeneID:107049078	LOC107049078	194.092	317.365	70.8193	0.223148	-2.16393	9.58e-20	4.38e-18	Down
CGNC:8217,GeneID:421508	RYR2	27.9349	45.6943	10.1755	0.222686	-2.16692	0.00921136	0.0400245	Down
CGNC:29,GeneID:425224	PLCE1	66.7903	109.453	24.1281	0.220443	-2.18152	5.55e-05	0.000486484	Down
CGNC:7048,GeneID:422403	LRAT	76.7436	125.774	27.7132	0.220342	-2.18219	1.29e-10	2.81e-09	Down
CGNC:63978,GeneID:100859150	PCSK4	13.941	22.8507	5.03141	0.220187	-2.1832	0.00462879	0.0226435	Down
CGNC:14529,GeneID:770004	CA9	993.391	1628.51	358.276	0.220003	-2.18441	2.55e-38	2.97e-36	Down
CGNC:5981,GeneID:428543	EFEMP1	214.327	351.882	76.7708	0.218172	-2.19646	0.00531089	0.02539	Down
CGNC:66418,GeneID:421922	RNF144A	615.32	1010.26	220.378	0.21814	-2.19668	1.11e-08	1.9e-07	Down
CGNC:1212,GeneID:431331	LZTS1	13.1568	21.6109	4.70275	0.21761	-2.20018	0.0052609	0.0251653	Down
GeneID:107054997	TRNP1	51.3843	84.5206	18.2481	0.215902	-2.21155	6.21e-08	9.49e-07	Down
CGNC:2916,GeneID:416256	FAXDC2	290.818	478.496	103.139	0.215548	-2.21392	2.8e-05	0.000264384	Down
GeneID:107052766	MATN2	91.3168	150.302	32.3319	0.215113	-2.21683	3.37e-06	3.88e-05	Down
CGNC:66171,GeneID:431181	KCNB2	1293.38	2130.78	455.977	0.213995	-2.22435	1.79e-17	6.98e-16	Down
CGNC:292,GeneID:419539	LRRTM4	14.3966	23.7536	5.03956	0.21216	-2.23677	0.00289624	0.0152733	Down
GeneID:107055016	LOC107055016	100.959	167.189	34.7283	0.207718	-2.2673	1.34e-13	3.95e-12	Down
CGNC:69007,GeneID:101749540	LOC101749540	88.5818	146.85	30.3131	0.206422	-2.27633	1.05e-12	2.85e-11	Down
CGNC:54312,GeneID:431663	NPR3	91.3007	151.367	31.2346	0.20635	-2.27683	0.00120583	0.00720034	Down
CGNC:11198,GeneID:770953	DDO	48.1026	79.7508	16.4544	0.206323	-2.27702	4.7e-05	0.000418983	Down
CGNC:7201,GeneID:428987	PPAPDC1A	104.916	174.013	35.8177	0.205833	-2.28046	5.89e-05	0.00051217	Down
CGNC:70489,GeneID:101751055	LOC101751055	867.808	1441.04	294.575	0.204418	-2.29041	1.4e-43	1.98e-41	Down
GeneID:107052062	LOC107052062	31.9689	53.1277	10.8101	0.203474	-2.29708	5.34e-06	5.91e-05	Down
CGNC:11054,GeneID:396378	PLN	41.4107	68.8921	13.9293	0.20219	-2.30621	3.37e-07	4.67e-06	Down
CGNC:61487,GeneID:100499455	CNP1	70.6726	117.756	23.5897	0.200327	-2.31957	7.29e-11	1.65e-09	Down
CGNC:3583,GeneID:428837	PAK6	78.0477	130.135	25.9599	0.199483	-2.32566	5.02e-12	1.28e-10	Down
CGNC:1616,GeneID:423618	OGDHL	21.5577	36.011	7.10438	0.197284	-2.34166	0.00014661	0.00114785	Down
CGNC:11347,GeneID:421113	SNTG1	15.5665	26.0463	5.0867	0.195295	-2.35627	0.00233999	0.012739	Down
CGNC:1803,GeneID:395535	OLFM1	270.029	451.834	88.2236	0.195256	-2.35656	6.3e-28	4.52e-26	Down
CGNC:6807,GeneID:396403	PTPRZ1	24.8307	41.5508	8.11067	0.195199	-2.35698	0.00587369	0.0276642	Down
CGNC:66651,GeneID:770737	GAMT	4385.73	7339.89	1431.57	0.19504	-2.35816	5.12e-19	2.23e-17	Down
CGNC:10449,GeneID:421696	SLC2A12	27.8807	46.6915	9.06981	0.194249	-2.36402	1.35e-05	0.000136091	Down
CGNC:51922,GeneID:423216	LTK	15.5996	26.1299	5.06929	0.194003	-2.36585	0.00102757	0.00629565	Down
CGNC:546,GeneID:395562	WNT11	30.1855	50.5845	9.78642	0.193467	-2.36984	5.16e-06	5.74e-05	Down
CGNC:5174,GeneID:396127	MFI2	3691.91	6193.37	1190.45	0.192213	-2.37922	2.08e-23	1.18e-21	Down
CGNC:11550,GeneID:418460	PDZK1	50.1803	84.2418	16.1189	0.191341	-2.38578	4.95e-06	5.54e-05	Down
CGNC:50593,GeneID:417761	CPED1	502.413	844.714	160.112	0.189546	-2.39938	1.2e-06	1.5e-05	Down
CGNC:50055,GeneID:415713	LOC415713	15.9537	26.8278	5.07951	0.189337	-2.40097	0.00084986	0.00537202	Down
CGNC:6714,GeneID:416728	HAO1	1720.98	2894.74	547.23	0.189043	-2.40321	6.02e-14	1.87e-12	Down
CGNC:51910,GeneID:423158	PAMR1	26.5175	44.6141	8.42079	0.188747	-2.40547	1.42e-05	0.000141701	Down
CGNC:8199,GeneID:429108	ACOT11	174.903	294.361	55.4439	0.188353	-2.40849	6.76e-22	3.5e-20	Down
CGNC:49560,GeneID:395933	LOC395933	76731.7	129668	23795	0.183506	-2.4461	1.87e-70	4.71e-68	Down
GeneID:101750262	TTC16	9.76944	16.5098	3.02908	0.183471	-2.44637	0.00930009	0.0403683	Down
CGNC:57798,GeneID:776274	CASP14	21.7905	36.836	6.74504	0.18311	-2.44922	0.00100346	0.00617821	Down
CGNC:65239,GeneID:100857820	LOC100857820	818.211	1383.59	252.836	0.18274	-2.45214	1.35e-26	9.17e-25	Down
CGNC:5502,GeneID:427678	GRIN2A	18.5953	31.4938	5.69673	0.180884	-2.46686	0.00024905	0.00183148	Down
CGNC:66505,GeneID:426557	RGS8	119.041	201.739	36.3427	0.180147	-2.47275	2.43e-07	3.43e-06	Down
CGNC:8738,GeneID:422638	SCARB2	1219.57	2068.88	370.258	0.178966	-2.48224	8.6e-55	1.59e-52	Down
CGNC:12133,GeneID:771199	GPR34	40.9471	69.4648	12.4295	0.178932	-2.48252	7e-08	1.06e-06	Down
CGNC:3344,GeneID:396213	TNR	17.7349	30.0935	5.37638	0.178656	-2.48475	0.000335809	0.00237461	Down
CGNC:11196,GeneID:421757	SLC22A16	208.752	354.411	63.0926	0.178021	-2.48988	5.39e-26	3.56e-24	Down
CGNC:1494,GeneID:415906	PFKFB4	358.286	608.564	108.008	0.177481	-2.49427	4.36e-09	7.87e-08	Down
CGNC:8306,GeneID:429027	B3GALT1	15.6872	26.6594	4.71505	0.176862	-2.4993	0.000617085	0.0040544	Down
CGNC:50509,GeneID:417445	MAP2K6	635.009	1081.13	188.886	0.174711	-2.51695	1.11e-45	1.69e-43	Down
CGNC:13766,GeneID:770097	GABRG3	12.6369	21.5476	3.72619	0.172928	-2.53175	0.00196169	0.0109233	Down
CGNC:7801,GeneID:426899	FAIM2	23.8488	40.6701	7.02752	0.172793	-2.53288	0.000438785	0.00299516	Down
CGNC:50508,GeneID:417443	ABCA9	128.471	219.217	37.7246	0.172088	-2.53878	2.18e-19	9.69e-18	Down
CGNC:50402,GeneID:417001	RTN4R	10.6091	18.1666	3.05161	0.167979	-2.57364	0.00369009	0.01865	Down
CGNC:5922,GeneID:395868	TLX1	29.2998	50.2289	8.37061	0.166649	-2.58511	1.05e-05	0.000108693	Down
CGNC:8988,GeneID:423514	KCNH5	17.6996	30.3524	5.04675	0.166272	-2.58838	0.00540502	0.0257888	Down
CGNC:9828,GeneID:418147	SLC6A12	652.228	1119.43	185.027	0.165287	-2.59696	3.9e-49	6.63e-47	Down
GeneID:107055574	LOC107055574	43.9093	75.4093	12.4094	0.16456	-2.60331	0.00785264	0.0351458	Down
CGNC:1753,GeneID:426894	AQP3	342.614	588.862	96.3664	0.163649	-2.61133	4.18e-32	3.67e-30	Down
CGNC:12012,GeneID:420266	DPYS	7220.15	12418.6	2021.74	0.1628	-2.61883	3.63e-15	1.25e-13	Down
CGNC:6455,GeneID:396138	GRIA3	133.529	229.687	37.3705	0.162702	-2.6197	3.23e-13	9.33e-12	Down
CGNC:7997,GeneID:395865	LEF1	179.473	308.946	50.0007	0.161843	-2.62733	1.4e-12	3.75e-11	Down
CGNC:6504,GeneID:416709	PEX6	1171.67	2018.24	325.094	0.161078	-2.63417	2.16e-32	1.93e-30	Down
CGNC:3584,GeneID:415958	ATP2B2	1086.71	1872.16	301.262	0.160916	-2.63562	1.06e-23	6.2e-22	Down
CGNC:64180,GeneID:100858936	PAQR9	166.762	287.609	45.9142	0.159641	-2.6471	1.37e-24	8.4e-23	Down
GeneID:107055428	LOC107055428	10.9848	18.96	3.00958	0.158733	-2.65532	0.00296095	0.0155561	Down
GeneID:107052770	LOC107052770	68.3585	118.042	18.6749	0.158205	-2.66013	1.2e-06	1.5e-05	Down
CGNC:49109,GeneID:374266	XIRP1	9.85074	17.0194	2.68204	0.157587	-2.66578	0.00488377	0.0236503	Down
CGNC:6059,GeneID:422341	CAPN6	68.5966	118.572	18.6209	0.157042	-2.67077	0.00868097	0.0382031	Down
CGNC:57795,GeneID:776271	LOC776271	21.0278	36.3639	5.69161	0.156518	-2.6756	0.000208213	0.00156676	Down
CGNC:49222,GeneID:395229	TCF7	94.3435	163.381	25.3063	0.154892	-2.69067	2.58e-16	9.64e-15	Down
CGNC:4531,GeneID:395201	SH3GL3	19.2074	33.2985	5.11643	0.153654	-2.70225	4.62e-05	0.000412867	Down
CGNC:66436,GeneID:422531	DKK2	28.7091	50.0785	7.33972	0.146564	-2.7704	0.00437469	0.0215445	Down
CGNC:11824,GeneID:421839	PRSS35	525.589	917.453	133.726	0.145758	-2.77835	0.000450724	0.00306671	Down
CGNC:2088,GeneID:416208	STC2	356.554	623.385	89.7225	0.143928	-2.79658	3.37e-16	1.25e-14	Down
CGNC:49398,GeneID:395606	CHRNA4	11.9897	20.9974	2.98193	0.142014	-2.81589	0.00310939	0.0162044	Down
CGNC:8786,GeneID:421576	PACRG	39.6404	69.4646	9.81614	0.141311	-2.82305	1.03e-06	1.31e-05	Down
CGNC:12128,GeneID:418559	EFHC2	27.6198	48.4916	6.74807	0.13916	-2.84519	5.25e-07	7.03e-06	Down
GeneID:107057210	LOC107057210	15.2906	26.8581	3.72315	0.138623	-2.85076	0.00417298	0.0206599	Down
CGNC:50969,GeneID:419316	APCDD1L	142.967	251.969	33.9658	0.134801	-2.89109	7.01e-09	1.24e-07	Down
CGNC:11955,GeneID:427979	KCNE2	11.4364	20.1681	2.70457	0.134101	-2.89861	0.00116084	0.00697375	Down
CGNC:4528,GeneID:427504	BNC1	31.1288	54.9077	7.34995	0.13386	-2.9012	1.2e-05	0.000123049	Down
CGNC:8162,GeneID:423412	TC2N	38.439	67.8584	9.01963	0.132918	-2.91139	0.000132447	0.00104879	Down
CGNC:16458,GeneID:423892	RBM20	8.62819	15.2387	2.01768	0.132405	-2.91697	0.00463413	0.0226565	Down
CGNC:6755,GeneID:424117	PPP1R1C	10.3531	18.3241	2.38214	0.130001	-2.94341	0.00167529	0.0095626	Down
CGNC:66956,GeneID:101747455	LOC101747455	162.339	287.437	37.2403	0.12956	-2.94831	5.66e-25	3.54e-23	Down
CGNC:8800,GeneID:424231	CNTNAP5	15.0504	26.6899	3.41095	0.1278	-2.96805	0.000126158	0.00100265	Down
CGNC:1375,GeneID:419613	RSPO1	25.2855	44.8773	5.69369	0.126872	-2.97855	6.22e-07	8.27e-06	Down
CGNC:2821,GeneID:417180	LAMC3	21.1146	37.4751	4.75405	0.126859	-2.9787	0.00616171	0.0287614	Down
CGNC:3834,GeneID:768548	FAM222A	58.443	103.733	13.1533	0.1268	-2.97938	7.46e-08	1.12e-06	Down
CGNC:4655,GeneID:419273	C20ORF96	7.50681	13.3307	1.68294	0.126246	-2.98569	0.00691621	0.0316791	Down
CGNC:12660,GeneID:418770	NALCN	133.958	237.951	29.9651	0.12593	-2.98931	2.27e-25	1.45e-23	Down
CGNC:6750,GeneID:422379	IL1RAPL2	9.10007	16.1722	2.02791	0.125394	-2.99546	0.00724321	0.0329527	Down
CGNC:49277,GeneID:395350	MYH7	95.8665	171.015	20.7181	0.121148	-3.04516	6.02e-05	0.000522042	Down
CGNC:8016,GeneID:421466	CYP1B1	531.015	947.378	114.651	0.12102	-3.04669	2.23e-58	4.64e-56	Down
CGNC:703,GeneID:419385	MEGF6	23.5425	42.0505	5.03445	0.119724	-3.06222	0.00275448	0.014645	Down
CGNC:52261,GeneID:424802	NYAP2	36.3152	64.8843	7.74621	0.119385	-3.06631	1.56e-09	2.98e-08	Down
CGNC:49240,GeneID:395279	MYH7B	15.7718	28.2301	3.31363	0.11738	-3.09075	4.88e-05	0.000433223	Down
GeneID:107057172	LOC107057172	194.756	349.346	40.1669	0.114978	-3.12058	4.08e-13	1.16e-11	Down
CGNC:51996,GeneID:423563	MDGA2	24.5088	43.9759	5.04164	0.114646	-3.12475	3.56e-07	4.91e-06	Down
GeneID:107049864	LOC107049864	15.0347	27.0301	3.0393	0.112441	-3.15276	5.88e-05	0.000511567	Down
CGNC:11247,GeneID:770757	DRD3	27.0623	48.6837	5.44094	0.111761	-3.16151	6.56e-08	1e-06	Down
CGNC:49331,GeneID:395458	SLC6A2	45.0844	81.1308	9.03801	0.1114	-3.16617	8.09e-12	2.03e-10	Down
CGNC:8714,GeneID:396315	IGFBP2	360.638	649.792	71.4827	0.110009	-3.18431	4.78e-08	7.45e-07	Down
CGNC:2021,GeneID:419903	PACSIN1	39.0569	70.3942	7.71952	0.109661	-3.18887	1.03e-09	2.02e-08	Down
CGNC:64759,GeneID:100858320	LOC100858320	8.62789	15.5554	1.70036	0.10931	-3.1935	0.00261465	0.0139809	Down
CGNC:3505,GeneID:415774	SLC7A10	41.7576	75.4138	8.1014	0.107426	-3.21859	2.24e-11	5.31e-10	Down
CGNC:6319,GeneID:416112	GRM7	17.4381	31.4949	3.38123	0.107358	-3.2195	1.05e-05	0.000108567	Down
CGNC:70630,GeneID:101751203	LOC101751203	27.7057	50.0525	5.35896	0.107067	-3.22342	3.21e-08	5.1e-07	Down
CGNC:49568,GeneID:395947	SCN5A	10.6635	19.3093	2.01768	0.104493	-3.25852	0.0060984	0.0285297	Down
CGNC:51174,GeneID:420075	RP11-330H6.5	32.4553	58.8001	6.11041	0.103918	-3.26648	0.00193209	0.0107799	Down
CGNC:56429,GeneID:770996	LOC770996	52.5374	95.2832	9.79153	0.102762	-3.28261	0.00215886	0.0119187	Down
CGNC:9331,GeneID:420761	AMPH	79.1581	143.945	14.3714	0.0998396	-3.32424	0.00109391	0.00664758	Down
CGNC:8191,GeneID:421507	GREM2	7.65423	13.9551	1.35332	0.0969767	-3.36622	0.00318803	0.0165418	Down
CGNC:9423,GeneID:424301	LRP1B	7.65927	13.9775	1.34102	0.095941	-3.38171	0.00287514	0.0151906	Down
CGNC:16366,GeneID:395504	GATM	16343.5	29835.9	2851.17	0.0955618	-3.38742	4.55e-22	2.38e-20	Down
CGNC:8634,GeneID:424719	C8H1ORF173	179.918	328.747	31.0882	0.0945658	-3.40254	9.52e-38	1.09e-35	Down
CGNC:17418,GeneID:425711	C8ORF22	3316.15	6060.88	571.419	0.0942799	-3.40691	3.12e-15	1.08e-13	Down
CGNC:11653,GeneID:427326	EDIL3	39.445	72.1696	6.72043	0.0931199	-3.42477	0.000900547	0.00563947	Down
CGNC:49603,GeneID:396013	MYBPC3	68.3619	125.167	11.5572	0.0923346	-3.43699	7.46e-10	1.5e-08	Down
CGNC:49636,GeneID:396067	MYL3	71.8027	131.628	11.977	0.0909907	-3.45814	9.64e-05	0.000791933	Down
CGNC:64319,GeneID:100858782	PROCA1	20.4558	37.5181	3.39353	0.0904506	-3.46673	2.5e-06	2.95e-05	Down
CGNC:49209,GeneID:395198	CASQ2	8.1313	14.9216	1.34102	0.089871	-3.476	0.00169522	0.00965277	Down
CGNC:56865,GeneID:771551	SUB1L1	20.7254	38.0449	3.40584	0.0895215	-3.48162	0.00169479	0.00965277	Down
CGNC:12611,GeneID:428015	EDAR	10.7994	19.8933	1.70548	0.085731	-3.54404	0.000234879	0.00174173	Down
GeneID:107049247	INHBE	36.4541	67.4345	5.4737	0.0811705	-3.6229	0.000111319	0.000896571	Down
GeneID:107052832	LOC107052832	6.87156	12.7368	1.00628	0.0790057	-3.6619	0.0031116	0.0162109	Down
CGNC:65279,GeneID:100857777	LOC100857777	14.0764	26.1598	1.99307	0.0761883	-3.71429	0.00304932	0.0159358	Down
CGNC:3876,GeneID:423743	SYNPO2L	11.7949	21.9315	1.65833	0.0756143	-3.7252	0.000122588	0.000980294	Down
CGNC:66339,GeneID:419335	LOC419335	19.1168	35.5464	2.68715	0.0755956	-3.72555	3.33e-07	4.62e-06	Down
CGNC:50329,GeneID:416696	LOC416696	72.7839	135.337	10.2308	0.0755948	-3.72557	7.63e-09	1.34e-07	Down
CGNC:4670,GeneID:423076	KCNC1	26.3915	49.1071	3.67601	0.0748571	-3.73972	2.45e-09	4.57e-08	Down
CGNC:3654,GeneID:415960	SLC6A1	9.83313	18.3129	1.35332	0.0738998	-3.75829	0.000290212	0.00209482	Down
CGNC:65135,GeneID:100857929	CRABP2	24.6286	45.9088	3.34847	0.0729374	-3.7772	0.000147622	0.00115471	Down
CGNC:49619,GeneID:396034	MYOM2	19.999	37.3262	2.67181	0.0715801	-3.8043	1.47e-07	2.14e-06	Down
CGNC:10586,GeneID:422770	GABRA4	25.7181	48.0478	3.38842	0.0705219	-3.82579	1.79e-09	3.39e-08	Down
CGNC:1253,GeneID:417505	HSD3B7	182.524	341.644	23.4045	0.0685055	-3.86764	3.94e-45	5.92e-43	Down
CGNC:51894,GeneID:423119	LOC423119	15.9269	29.8485	2.00537	0.0671851	-3.89572	1.21e-05	0.000123561	Down
CGNC:12684,GeneID:418794	GPC6	26.8995	50.4444	3.35454	0.0664998	-3.91051	0.000443121	0.00301864	Down
CGNC:184,GeneID:421161	TNNI1	21.9333	41.1897	2.67692	0.0649901	-3.94364	8.64e-07	1.12e-05	Down
CGNC:49466,GeneID:395765	NPPB	35.8159	67.3467	4.28508	0.0636271	-3.97421	1.09e-08	1.86e-07	Down
CGNC:59,GeneID:419515	GKN2	39.377	74.122	4.63212	0.0624932	-4.00016	9.04e-13	2.48e-11	Down
CGNC:17016,GeneID:426785	INDOL1	578.172	1088.91	67.4301	0.0619242	-4.01335	1.99e-19	8.91e-18	Down
CGNC:757,GeneID:770671	MMEL1	26.2473	49.5126	2.98193	0.0602257	-4.05348	3.48e-10	7.26e-09	Down
CGNC:5286,GeneID:423824	KNDC1	12.3037	23.2889	1.31849	0.0566142	-4.14269	0.000342762	0.0024131	Down
CGNC:49031,GeneID:374069	MYH1B	6.33165	12.0041	0.659243	0.0549183	-4.18657	0.00246631	0.0133147	Down
CGNC:11572,GeneID:420166	TRIM55	9.76583	18.5254	1.00628	0.0543192	-4.2024	0.000111399	0.000896787	Down
CGNC:55902,GeneID:770271	LOC770271	13.3697	25.4055	1.33383	0.0525014	-4.2515	5.58e-06	6.14e-05	Down
CGNC:12129,GeneID:418560	NDP	13.7773	26.1911	1.36355	0.0520615	-4.26364	3.26e-06	3.77e-05	Down
CGNC:51999,GeneID:423605	LOC423605	10.6428	20.2968	0.988864	0.0487203	-4.35933	0.0085789	0.0378417	Down
CGNC:51789,GeneID:422618	TECRL	21.5345	41.0811	1.98796	0.048391	-4.36912	1.25e-07	1.84e-06	Down
CGNC:3666,GeneID:769706	GLRA4	7.58728	14.4979	0.676661	0.0466731	-4.42127	0.00477461	0.0231951	Down
CGNC:1179,GeneID:414890	GABRB2	23.127	44.2086	2.04532	0.0462653	-4.43393	5.12e-10	1.05e-08	Down
CGNC:841,GeneID:415645	CETP	31.4703	60.2258	2.71479	0.0450769	-4.47147	3.53e-05	0.000324653	Down
CGNC:51944,GeneID:423298	ACTC1	67.1493	128.678	5.62098	0.0436827	-4.51679	3.15e-10	6.58e-09	Down
CGNC:50311,GeneID:416655	LOC416655	60.3923	115.743	5.04164	0.043559	-4.52089	2.73e-05	0.000258669	Down
CGNC:66514,GeneID:426992	ACSM5	407.455	781.437	33.4728	0.042835	-4.54507	9.88e-11	2.19e-09	Down
CGNC:176,GeneID:396433	TNNT2	28.1854	54.0635	2.30735	0.0426785	-4.55035	3.18e-08	5.07e-07	Down
CGNC:7964,GeneID:424618	CYP4B1	530.708	1018.2	43.2189	0.0424465	-4.55821	4.08e-12	1.05e-10	Down
GeneID:107050488	LOC107050488	8.83599	16.9779	0.69408	0.0408813	-4.61241	0.00323438	0.0167058	Down
GeneID:107057393	LOC107057393	21.5485	41.4489	1.64811	0.0397623	-4.65245	1.08e-09	2.11e-08	Down
CGNC:8193,GeneID:775973	FMN2	4.6004	8.86607	0.334735	0.0377546	-4.7272	0.00682481	0.0313628	Down
CGNC:14421,GeneID:770587	FMO4	186.777	361.652	11.9014	0.0329085	-4.9254	2.16e-45	3.27e-43	Down
CGNC:50364,GeneID:416874	MYL2	60.6514	117.991	3.31155	0.0280661	-5.15503	3.69e-06	4.22e-05	Down
CGNC:50479,GeneID:417306	MYH1D	49.5267	96.4163	2.63697	0.0273498	-5.19232	3.76e-16	1.38e-14	Down
CGNC:8541,GeneID:424198	OBSL1	6.45343	12.5772	0.329621	0.0262078	-5.25386	0.000618149	0.00405981	Down
CGNC:54562,GeneID:768566	MYH1F	7.12659	13.9236	0.329621	0.0236737	-5.40057	0.000255419	0.00187222	Down
CGNC:11920,GeneID:771502	LRRTM1	25.6241	50.2193	1.02881	0.0204864	-5.60919	3.45e-13	9.92e-12	Down
CGNC:68449,GeneID:101748971	PIGY	178.905	355.092	2.71687	0.00765117	-7.0301	8.76e-78	2.89e-75	Down
CGNC:52956,GeneID:426991	ACSM4	5.20609	10.4122	0	0	#NAME?	0.000762448	0.00489485	Down
CGNC:8462,GeneID:427871	ALX1	3.69576	7.39152	0	0	#NAME?	0.00602432	0.028255	Down
CGNC:9585,GeneID:427474	HSD17B3	3.41453	6.82906	0	0	#NAME?	0.00937949	0.0406711	Down
CGNC:68171,GeneID:101748689	LOC101748689	3.5572	7.11439	0	0	#NAME?	0.00840561	0.0372641	Down
GeneID:107055794	LOC107055794	3.61069	7.22138	0	0	#NAME?	0.00719776	0.0327548	Down
CGNC:50605,GeneID:417848	LOC417848	3.81776	7.63552	0	0	#NAME?	0.00490104	0.0237135	Down
CGNC:810,GeneID:395533	MEOX1	4.71369	9.42738	0	0	#NAME?	0.00139567	0.0082036	Down
CGNC:10960,GeneID:418313	TBX15	3.67997	7.35994	0	0	#NAME?	0.00609982	0.0285297	Down

## Sheet: (mock vs CH60 )(p<0.01,FC>4)
Dbxref	id	baseMean	baseMean_control_Sample_mock	baseMean_case_Sample_CH60	foldChange	log2FoldChange	pval	padj	up_down
CGNC:51132,GeneID:419941	AGPAT1	13.3157	0	26.6314	Inf	Inf	6.66e-09	8.21e-08	Up
CGNC:505,GeneID:428263	AVPR1B	17.7903	0	35.5806	Inf	Inf	1.29e-11	2.13e-10	Up
CGNC:8414,GeneID:428906	BDKRB2	25.5542	0	51.1084	Inf	Inf	6.06e-14	1.21e-12	Up
CGNC:51096,GeneID:419812	C26H6ORF222	4.79002	0	9.58003	Inf	Inf	0.00366262	0.0159788	Up
CGNC:53614,GeneID:429283	DLX1	9.12088	0	18.2418	Inf	Inf	2.67e-06	2.25e-05	Up
CGNC:54342,GeneID:554219	IFNB	42.4059	0	84.8119	Inf	Inf	4.78e-11	7.45e-10	Up
CGNC:55112,GeneID:769256	IL17REL	9.13735	0	18.2747	Inf	Inf	1.07e-05	8.09e-05	Up
CGNC:12592,GeneID:101750396	IL18RAP	9.76292	0	19.5258	Inf	Inf	1.04e-06	9.38e-06	Up
CGNC:8294,GeneID:395337	IL6	6.54433	0	13.0887	Inf	Inf	0.000105269	0.000655808	Up
CGNC:49883,GeneID:407087	KK34	11.2061	0	22.4123	Inf	Inf	1.26e-07	1.3e-06	Up
CGNC:50267,GeneID:416488	KPNA7	4.71348	0	9.42696	Inf	Inf	0.00151031	0.00728791	Up
CGNC:64120,GeneID:100858999	LOC100858999	8.09947	0	16.1989	Inf	Inf	1.15e-05	8.69e-05	Up
CGNC:63874,GeneID:100859258	LOC100859258	3.69592	0	7.39183	Inf	Inf	0.00657849	0.0265814	Up
CGNC:63409,GeneID:100859740	LOC100859740	3.92357	0	7.84714	Inf	Inf	0.00492749	0.0206603	Up
GeneID:107052215	LOC107052215	3.55989	0	7.11978	Inf	Inf	0.00819944	0.0320604	Up
GeneID:107052465	LOC107052465	5.21644	0	10.4329	Inf	Inf	0.000727629	0.00378694	Up
GeneID:107056699	LOC107056699	28.6785	0	57.357	Inf	Inf	8.14e-06	6.3e-05	Up
CGNC:50458,GeneID:417192	LOC417192	148.856	0	297.712	Inf	Inf	5.45e-51	5e-49	Up
CGNC:51224,GeneID:420300	LOC420300	26.6672	0	53.3343	Inf	Inf	3.82e-07	3.67e-06	Up
CGNC:51225,GeneID:420301	LOC420301	7.75167	0	15.5033	Inf	Inf	1.88e-05	0.000137213	Up
CGNC:51796,GeneID:422654	LOC422654	6.73085	0	13.4617	Inf	Inf	8.14e-05	0.000520725	Up
CGNC:52209,GeneID:424523	LOC424523	16.2772	0	32.5543	Inf	Inf	7.82e-05	0.00050289	Up
CGNC:56676,GeneID:771308	LOC771308	40.9866	0	81.9731	Inf	Inf	3.52e-10	5.03e-09	Up
CGNC:50889,GeneID:418983	MMP7	3.69227	0	7.38454	Inf	Inf	0.00659661	0.0266418	Up
CGNC:49451,GeneID:395740	PAX9	4.54283	0	9.08567	Inf	Inf	0.00193126	0.00907267	Up
CGNC:66742,GeneID:101747236	TLDC2	4.55852	0	9.11703	Inf	Inf	0.00190856	0.00898375	Up
CGNC:49723,GeneID:396260	AVD	1428.24	0.330228	2856.15	8649.01	13.0783	2.88e-167	1.3e-164	Up
CGNC:12277,GeneID:428650	RSAD2	11953.5	5.53292	23901.4	4319.85	12.0768	0	0	Up
CGNC:50830,GeneID:418700	LOC418700	3498.19	3.6067	6992.78	1938.83	10.921	1.14e-146	4.24e-144	Up
CGNC:52052,GeneID:423790	IFIT5	20670.7	26.5079	41314.9	1558.59	10.606	0	0	Up
CGNC:49545,GeneID:395908	OASL	19997.7	26.1824	39969.3	1526.57	10.5761	0	0	Up
CGNC:71627,GeneID:101752219	LOC101752219	19884.7	27.805	39741.5	1429.29	10.4811	0	0	Up
CGNC:49866,GeneID:403120	IFI6	24193.6	53.7429	48333.5	899.347	9.81273	0	0	Up
CGNC:1577,GeneID:424349	ATP6V1G3	141.062	0.322294	281.802	874.364	9.77209	2.83e-51	2.64e-49	Up
CGNC:51737,GeneID:422427	DDX60	6269.58	17.2969	12521.9	723.938	9.49972	0	0	Up
CGNC:49259,GeneID:395313	MX1	5986.84	16.6757	11957	717.031	9.48589	3.08e-281	3.43e-278	Up
CGNC:12732,GeneID:418837	EPSTI1	2466.94	6.88397	4926.99	715.719	9.48325	4.6e-299	5.91e-296	Up
CGNC:51287,GeneID:420559	SAMD9L	338.468	0.982348	675.953	688.1	9.42647	6.64e-54	6.52e-52	Up
CGNC:52759,GeneID:426356	S100A9	394.737	1.63447	787.839	482.016	8.91294	9.73e-120	2.26e-117	Up
GeneID:395551	CCL4	428.755	2.29452	855.215	372.72	8.54195	1.41e-34	8.18e-33	Up
CGNC:588,GeneID:428264	IL10	60.0516	0.322294	119.781	371.651	8.53781	1.8e-33	1e-31	Up
CGNC:57466,GeneID:772339	SERPINA3	20320.6	111.425	40529.9	363.742	8.50677	7.65e-68	9.61e-66	Up
CGNC:2247,GeneID:427807	ANKFN1	116.48	0.644587	232.316	360.411	8.4935	1.04e-38	6.79e-37	Up
CGNC:69724,GeneID:101750271	LOC101750271	743.049	4.22075	1481.88	351.094	8.45571	1.32e-35	7.85e-34	Up
CGNC:65812,GeneID:100857191	LOC100857191	2313.14	13.7453	4612.54	335.571	8.39048	6.96e-41	4.82e-39	Up
CGNC:50416,GeneID:417039	IL4I1	135.906	0.98988	270.823	273.592	8.09588	2.8e-69	3.6e-67	Up
CGNC:50688,GeneID:418167	USP18	4751.8	37.6316	9465.97	251.543	7.97466	0	0	Up
GeneID:107056042	LOC107056042	40.8783	0.329826	81.4268	246.878	7.94765	2.87e-19	8.13e-18	Up
CGNC:51884,GeneID:423079	HPS5	57264.7	495.362	114034	230.203	7.84676	1.19e-107	2.34e-105	Up
CGNC:50642,GeneID:417973	LOC417973	1126.15	10.1354	2242.17	221.222	7.78935	3.87e-274	4.04e-271	Up
CGNC:50049,GeneID:415686	MLKL	219.004	1.98016	436.029	220.198	7.78266	1.06e-84	1.59e-82	Up
CGNC:51563,GeneID:421921	CMPK2	6307.41	58.8528	12556	213.345	7.73705	0	0	Up
CGNC:65604,GeneID:100857411	PLACL2	1457.35	13.7295	2900.98	211.296	7.72312	1.23e-236	9.81e-234	Up
CGNC:49835,GeneID:396495	IL8L2	97.2303	0.981945	193.479	197.036	7.62232	6.96e-21	2.14e-19	Up
CGNC:382,GeneID:421177	ELF3	639.158	6.5224	1271.79	194.989	7.60725	1.73e-72	2.31e-70	Up
CGNC:5819,GeneID:424930	B3GNT7	1696.23	17.9895	3374.47	187.58	7.55137	4.32e-117	9.62e-115	Up
CGNC:3608,GeneID:419218	ZNFX1	5347.71	62.5503	10632.9	169.989	7.4093	0	0	Up
CGNC:49507,GeneID:395840	AvBD2	23.6682	0.330228	47.0062	142.345	7.15324	2.69e-06	2.26e-05	Up
CGNC:4149,GeneID:416546	NOXO1	22.3582	0.322294	44.3942	137.745	7.10585	9.6e-09	1.15e-07	Up
CGNC:3925,GeneID:428842	OLFML1	213.951	3.2384	424.663	131.133	7.03489	3.54e-16	8.18e-15	Up
CGNC:66178,GeneID:373903	DIO2	530.529	8.1414	1052.92	129.329	7.0149	4.16e-96	6.95e-94	Up
CGNC:4367,GeneID:427406	CCL19	1477.45	22.8152	2932.08	128.515	7.00579	2.61e-104	4.89e-102	Up
CGNC:55010,GeneID:769132	SLCO4C1	230.212	3.58329	456.842	127.492	6.99426	2.74e-41	1.92e-39	Up
CGNC:66203,GeneID:395394	FGF19	2196.67	35.4895	4357.84	122.793	6.94008	2.23e-120	5.23e-118	Up
CGNC:55760,GeneID:770082	HSPA12B	322.271	5.24829	639.293	121.81	6.92848	1.43e-125	3.84e-123	Up
CGNC:66201,GeneID:395299	SOCS3	639.672	10.7836	1268.56	117.638	6.8782	1.17e-191	6.73e-189	Up
CGNC:51528,GeneID:421702	VNN1	20300.1	359.635	40240.5	111.893	6.80597	1.48e-61	1.74e-59	Up
CGNC:12701,GeneID:418812	IRG1	126.758	2.27946	251.236	110.217	6.78421	4.85e-26	1.93e-24	Up
CGNC:6790,GeneID:423225	SPTBN5	1211.65	22.8465	2400.46	105.069	6.71519	3.55e-123	9.26e-121	Up
CGNC:53425,GeneID:428660	GVIN1	491.615	9.80168	973.429	99.3125	6.6339	1.49e-54	1.51e-52	Up
CGNC:51762,GeneID:422513	LOC422513	3709.21	77.2836	7341.14	94.9896	6.5697	0	0	Up
CGNC:52896,GeneID:426826	DMBT1L	4299.37	91.8504	8506.9	92.6169	6.5332	0	0	Up
CGNC:49706,GeneID:396216	CSF3	180.524	3.91392	357.135	91.2473	6.51171	1.3e-43	1.01e-41	Up
CGNC:64842,GeneID:100858236	MADCAM1	1834.68	41.5079	3627.85	87.4016	6.44959	1.26e-143	4.59e-141	Up
CGNC:51761,GeneID:422511	LOC422511	43.2251	0.98275	85.4674	86.9676	6.44241	5.37e-23	1.86e-21	Up
CGNC:5558,GeneID:420479	MAP3K8	354.374	8.18861	700.559	85.5529	6.41874	1.38e-127	3.9e-125	Up
CGNC:66285,GeneID:417536	LOC417536	111.165	2.64102	219.689	83.1835	6.37823	3.47e-11	5.51e-10	Up
CGNC:49508,GeneID:395841	AvBD1	27.1524	0.652522	53.6523	82.223	6.36147	5.08e-15	1.07e-13	Up
CGNC:2831,GeneID:771952	P2RX7	265.042	6.50693	523.576	80.4644	6.33028	8.93e-46	7.46e-44	Up
CGNC:63374,GeneID:100859777	LOC100859777	340.756	8.52044	672.992	78.9856	6.30352	1.01e-122	2.53e-120	Up
CGNC:69630,GeneID:101750175	LOC101750175	311.802	7.85999	615.745	78.3391	6.29166	2.4e-81	3.49e-79	Up
CGNC:12587,GeneID:418715	IL1R2	136.429	3.62297	269.235	74.3135	6.21555	6.91e-16	1.56e-14	Up
CGNC:4754,GeneID:396471	LECT2	97.9386	2.60888	193.268	74.081	6.21103	1.87e-05	0.000136407	Up
CGNC:12414,GeneID:422000	C3H8ORF80	1630.24	44.4224	3216.06	72.3972	6.17786	9.1e-140	3.1e-137	Up
CGNC:49786,GeneID:396393	LCN8	203.42	5.58887	401.252	71.7948	6.16581	8.56e-44	6.74e-42	Up
CGNC:51266,GeneID:420486	LOC420486	23.3416	0.652522	46.0306	70.5427	6.14042	4.58e-12	7.86e-11	Up
CGNC:10460,GeneID:768536	TAAR1	1414.93	42.0475	2787.82	66.3016	6.05097	7.72e-248	6.78e-245	Up
CGNC:13959,GeneID:420045	KRT20	259.477	7.88138	511.072	64.8455	6.01893	1.46e-07	1.49e-06	Up
CGNC:49485,GeneID:395799	TPH1	459.678	14.7126	904.643	61.4876	5.94222	1.91e-11	3.12e-10	Up
CGNC:308,GeneID:419813	ETV7	177.78	5.90041	349.66	59.2602	5.88899	1.21e-72	1.63e-70	Up
CGNC:6021,GeneID:417700	SLC26A3	19.2658	0.652119	37.8795	58.0868	5.86014	0.00642018	0.0260616	Up
CGNC:49887,GeneID:407777	AvBD7	19.4114	0.660054	38.1628	57.8177	5.85344	3.06e-10	4.41e-09	Up
GeneID:107057238	LOC107057238	19.0362	0.652522	37.4198	57.3464	5.84163	2.26e-10	3.3e-09	Up
CGNC:49524,GeneID:395872	IL8L1	28.2825	0.98988	55.5752	56.1433	5.81104	1.03e-05	7.86e-05	Up
CGNC:65465,GeneID:100857563	LOC100857563	606.904	21.8883	1191.92	54.4545	5.76698	8.59e-143	3.05e-140	Up
CGNC:66067,GeneID:100857521	SLC6A14	1375.72	49.8326	2701.6	54.2135	5.76058	2.35e-102	4.35e-100	Up
CGNC:52118,GeneID:424044	STAT1	18508.1	672.702	36343.4	54.026	5.75558	8.76e-173	4.3e-170	Up
CGNC:64701,GeneID:100858381	LOC100858381	792.873	29.1223	1556.62	53.4513	5.74015	2.29e-105	4.35e-103	Up
CGNC:7942,GeneID:771940	CP	14620.8	541.603	28700	52.9908	5.72767	6.55e-225	4.97e-222	Up
GeneID:107052152	LOC107052152	70.8294	2.62515	139.034	52.9622	5.72689	4.64e-33	2.54e-31	Up
CGNC:51253,GeneID:420413	GIMAP5	105.604	3.93733	207.271	52.6426	5.71816	3.39e-14	6.84e-13	Up
CGNC:12103,GeneID:428382	KCNK9	8.60901	0.322294	16.8957	52.4234	5.71214	3.98e-05	0.000270139	Up
CGNC:51321,GeneID:420706	TGM4	545.222	20.7233	1069.72	51.6192	5.68984	6.72e-134	2.04e-131	Up
CGNC:53176,GeneID:427727	TAP1	492.492	18.8833	966.102	51.1616	5.67699	9.9e-142	3.44e-139	Up
CGNC:65329,GeneID:100857706	LOC100857706	102.65	3.94446	201.355	51.0476	5.67377	4.07e-45	3.35e-43	Up
GeneID:107049127	LOC107049127	195.969	7.53609	384.401	51.0081	5.67265	1.73e-43	1.34e-41	Up
CGNC:63949,GeneID:100859179	GNGT2	8.56435	0.329826	16.7989	50.9325	5.67052	4.1e-05	0.000277803	Up
CGNC:9068,GeneID:771693	TNIP3	41.4774	1.6416	81.3132	49.5329	5.63032	0.000171308	0.00101424	Up
CGNC:50115,GeneID:415922	LOC415922	1998.18	79.3861	3916.98	49.3409	5.62471	1.34e-255	1.24e-252	Up
GeneID:107055111	LOC107055111	8.10676	0.329826	15.8837	48.1578	5.5897	7.81e-05	0.000502292	Up
CGNC:49963,GeneID:415343	RGPD1	40.1722	1.65074	78.6937	47.6718	5.57506	1.16e-19	3.36e-18	Up
CGNC:5120,GeneID:396384	IRF1	1222.75	51.1054	2394.4	46.8522	5.55004	4.31e-208	2.88e-205	Up
CGNC:51030,GeneID:419563	LOC419563	2611.49	109.659	5113.33	46.6292	5.54316	5.75e-269	5.65e-266	Up
CGNC:69568,GeneID:101750112	LOC101750112	131.083	5.56426	256.601	46.1159	5.52719	4.11e-46	3.45e-44	Up
CGNC:5410,GeneID:416630	SOCS1	952.195	40.6688	1863.72	45.8268	5.51812	5.87e-193	3.5e-190	Up
CGNC:2475,GeneID:424402	SELE	110.488	4.90501	216.071	44.0512	5.46111	2.49e-19	7.09e-18	Up
CGNC:1162,GeneID:416159	ATP10B	36.5302	1.63406	71.4263	43.7108	5.44992	1.28e-14	2.64e-13	Up
GeneID:107055361	LOC107055361	6100.6	278.985	11922.2	42.7342	5.41732	2.12e-301	2.95e-298	Up
CGNC:1014,GeneID:415303	STOML1	423.405	19.5613	827.249	42.2901	5.40225	1.28e-123	3.39e-121	Up
GeneID:107056753	LOC107056753	34.5527	1.62653	67.4788	41.4863	5.37456	0.00369843	0.016114	Up
CGNC:50175,GeneID:416147	LOC416147	2118.32	99.8331	4136.8	41.4372	5.37285	1.44e-194	8.93e-192	Up
CGNC:11177,GeneID:427224	CD274	530.192	25.9081	1034.48	39.9286	5.31935	8.56e-123	2.16e-120	Up
CGNC:49912,GeneID:414337	CATH1	26.4818	1.29711	51.6665	39.8321	5.31586	4.61e-13	8.67e-12	Up
CGNC:51870,GeneID:422993	LOC422993	6.57576	0.322294	12.8292	39.806	5.31491	0.000592084	0.00314623	Up
CGNC:50142,GeneID:416036	NTN4L	206.364	10.1152	402.613	39.8026	5.31479	1.38e-74	1.92e-72	Up
CGNC:5424,GeneID:424902	ATP13A5	13.3967	0.660054	26.1333	39.5927	5.30716	0.0012855	0.00630711	Up
CGNC:66472,GeneID:424409	RGS16	26.5688	1.31177	51.8259	39.5083	5.30408	0.000315975	0.00177567	Up
CGNC:51618,GeneID:422080	RNF213	7190.77	355.393	14026.1	39.4666	5.30256	1.64e-243	1.37e-240	Up
CGNC:8301,GeneID:395210	SPP1	9979.92	495.901	19463.9	39.2497	5.29461	3.63e-42	2.63e-40	Up
CGNC:51434,GeneID:421195	LOC421195	6.57893	0.329826	12.828	38.8934	5.28145	0.000590874	0.00314079	Up
CGNC:27378,GeneID:431636	SLC46A2	233.538	11.7176	455.359	38.8612	5.28026	2.37e-07	2.35e-06	Up
CGNC:71567,GeneID:101752158	LOC101752158	31.6434	1.62693	61.6598	37.8994	5.2441	4.1e-15	8.73e-14	Up
CGNC:349,GeneID:420057	SLC1A6	177.135	9.15468	345.115	37.6982	5.23642	1.34e-15	2.96e-14	Up
CGNC:56156,GeneID:770612	LOC770612	7581.79	403.583	14760	36.5725	5.19269	4.49e-291	5.35e-288	Up
CGNC:49439,GeneID:395715	SERPINB10	36.9809	1.97303	71.9888	36.4864	5.18929	8.35e-05	0.000531377	Up
CGNC:50888,GeneID:418982	MMP1	24.4086	1.31971	47.4976	35.991	5.16957	6.56e-12	1.11e-10	Up
CGNC:966,GeneID:404671	IL12B	306.763	16.6297	596.897	35.8934	5.16565	0.00594852	0.0243841	Up
CGNC:8390,GeneID:420628	SNX10	1105.58	60.3947	2150.76	35.6117	5.15428	2.13e-190	1.14e-187	Up
CGNC:49168,GeneID:395096	TNFRSF6B	23.8611	1.30464	46.4175	35.5787	5.15294	1.4e-11	2.31e-10	Up
GeneID:107049096	LOC107049096	28.8145	1.6428	55.9863	34.0797	5.09084	1.33e-13	2.61e-12	Up
CGNC:49781,GeneID:396382	ISL2	22.7293	1.30424	44.1543	33.8545	5.08127	3.57e-09	4.53e-08	Up
CGNC:65027,GeneID:100858043	B3GNT4	112.407	6.51527	218.299	33.5058	5.06634	3.81e-44	3.03e-42	Up
CGNC:49622,GeneID:396037	NKX2-6	5.37199	0.330228	10.4137	31.535	4.97888	0.00283291	0.0126941	Up
CGNC:2855,GeneID:424017	RAB17	5.21325	0.322294	10.1042	31.351	4.97044	0.0035072	0.0153669	Up
CGNC:2901,GeneID:419185	RBPJL	20.9584	1.29711	40.6197	31.3156	4.96881	0.000184644	0.00108626	Up
CGNC:8422,GeneID:424185	IFIH1	2898.49	182.488	5614.48	30.7662	4.94328	5.6e-54	5.56e-52	Up
CGNC:50672,GeneID:418095	DRAM1	374.568	23.742	725.394	30.5533	4.93325	6.86e-88	1.06e-85	Up
CGNC:13903,GeneID:420894	SERPINB1	113.23	7.19119	219.269	30.4913	4.93033	2.81e-43	2.15e-41	Up
CGNC:10375,GeneID:770428	IL22RA2	15.2102	0.974413	29.446	30.2192	4.91739	1.54e-07	1.57e-06	Up
CGNC:51178,GeneID:420090	ACSBG2	2599.38	166.956	5031.81	30.1386	4.91354	7.12e-06	5.58e-05	Up
GeneID:107049309	LOC107049309	566.71	36.7493	1096.67	29.842	4.89927	3.45e-112	7.49e-110	Up
CGNC:2612,GeneID:419669	RNF19B	422.093	28.4425	815.744	28.6805	4.842	9.47e-83	1.39e-80	Up
CGNC:49958,GeneID:415327	PATL2	382.859	26.1368	739.581	28.2965	4.82255	3.24e-10	4.65e-09	Up
CGNC:272,GeneID:404303	KCNA3	18.028	1.30424	34.7518	26.6453	4.73581	0.000154714	0.00092684	Up
CGNC:50277,GeneID:416523	GRAP	76.7689	5.55713	147.981	26.629	4.73492	5.91e-30	2.84e-28	Up
CGNC:10069,GeneID:426055	CAPSL	433.279	32.002	834.557	26.0783	4.70478	5.13e-09	6.41e-08	Up
CGNC:2646,GeneID:420033	KLHL10	132.411	9.80962	255.012	25.9961	4.70022	1.68e-39	1.11e-37	Up
CGNC:51886,GeneID:423091	TRPM5	43.849	3.26934	84.4288	25.8244	4.69066	2.57e-18	6.87e-17	Up
CGNC:16000,GeneID:428455	MYRIP	210.106	15.6866	404.526	25.7879	4.68862	2.39e-05	0.000170564	Up
CGNC:66284,GeneID:417535	CCLI7	21.7008	1.62653	41.7751	25.6835	4.68277	7.3e-10	1.01e-08	Up
CGNC:1542,GeneID:414830	B2M	3091.32	235.445	5947.19	25.2594	4.65875	1.27e-196	8.18e-194	Up
CGNC:51590,GeneID:422002	LOC422002	87.6763	6.86177	168.491	24.555	4.61794	5.53e-05	0.000365105	Up
CGNC:65882,GeneID:100857114	C15ORF43	3217.52	252.573	6182.46	24.478	4.61341	1.15e-49	1.03e-47	Up
CGNC:3057,GeneID:423695	SRGN	8.24512	0.652119	15.8381	24.2871	4.60212	0.00024875	0.00143113	Up
CGNC:67816,GeneID:101748329	LOC101748329	57.5871	4.57438	110.6	24.1781	4.59563	1e-22	3.41e-21	Up
CGNC:9517,GeneID:424320	NR4A2	12.1532	0.966881	23.3394	24.1389	4.59329	1.52e-05	0.000112994	Up
CGNC:49867,GeneID:403121	IFI27L2	1513.57	120.434	2906.7	24.1352	4.59306	2.08e-101	3.73e-99	Up
CGNC:51328,GeneID:420728	TRANK1	7260.96	585.475	13936.4	23.8036	4.57311	1.22e-136	3.78e-134	Up
CGNC:7631,GeneID:421416	FOSL2	52.3363	4.23622	100.436	23.709	4.56736	8.06e-21	2.46e-19	Up
CGNC:49779,GeneID:396379	HMGCS1	2237.52	183.051	4291.99	23.447	4.55133	7.29e-26	2.86e-24	Up
CGNC:70252,GeneID:101750812	LOC101750812	20.0595	1.6424	38.4766	23.427	4.5501	1.02e-07	1.07e-06	Up
CGNC:51661,GeneID:422224	LOC422224	339.341	28.1566	650.526	23.1038	4.53006	5.81e-48	5.02e-46	Up
CGNC:7696,GeneID:771694	BEST4	19.4208	1.62734	37.2143	22.8682	4.51527	1.06e-08	1.26e-07	Up
CGNC:11893,GeneID:373960	SMYD1	173.132	14.6035	331.661	22.711	4.50532	5.48e-55	5.58e-53	Up
CGNC:64999,GeneID:100858073	UBE2L6	320.542	27.4038	613.68	22.394	4.48504	4.64e-79	6.68e-77	Up
GeneID:107051573	PLA2G3	57.7069	4.93554	110.478	22.3842	4.48441	3.16e-22	1.05e-20	Up
CGNC:4755,GeneID:418247	PFKFB3	571.805	49.1281	1094.48	22.2781	4.47755	6.25e-11	9.66e-10	Up
GeneID:107057583	LOC107057583	30.1383	2.60928	57.6673	22.1008	4.46603	1.09e-07	1.14e-06	Up
CGNC:50447,GeneID:417131	LOC417131	86.1869	7.52142	164.852	21.9177	4.45403	6.45e-07	5.97e-06	Up
CGNC:6835,GeneID:772063	STEAP4	1228.95	107.334	2350.56	21.8995	4.45283	0.000425034	0.00232668	Up
CGNC:49293,GeneID:395387	MMP9	14.9786	1.32051	28.6368	21.6861	4.4387	7e-07	6.46e-06	Up
CGNC:66881,GeneID:101747378	LOC101747378	5468.3	484.468	10452.1	21.5745	4.43125	4.58e-224	3.32e-221	Up
CGNC:49435,GeneID:395708	LYG2	1270.32	112.831	2427.82	21.5172	4.42742	6.5e-165	2.86e-162	Up
CGNC:51978,GeneID:423478	LOC423478	225.339	20.2447	430.433	21.2615	4.41017	6.84e-29	3.08e-27	Up
CGNC:8224,GeneID:420596	AGR2	10.8842	0.982348	20.7861	21.1596	4.40324	0.0086577	0.0335147	Up
CGNC:70209,GeneID:101750767	LOC101750767	592.524	53.7701	1131.28	21.0392	4.39501	1.99e-118	4.55e-116	Up
CGNC:4105,GeneID:424827	VAMP2	127.655	11.6724	243.638	20.8731	4.38357	1.79e-30	8.7e-29	Up
CGNC:5911,GeneID:425791	EHF	221.697	20.3213	423.072	20.8192	4.37984	3.84e-64	4.58e-62	Up
CGNC:49525,GeneID:395873	K123	148.487	13.7065	283.267	20.6667	4.36923	6.97e-14	1.39e-12	Up
CGNC:66094,GeneID:100859603	TRPM6	35.1882	3.25387	67.1224	20.6285	4.36657	1.68e-07	1.71e-06	Up
CGNC:66244,GeneID:415651	CX3CL1	31.3997	2.92404	59.8753	20.4769	4.35592	2.72e-06	2.29e-05	Up
CGNC:12363,GeneID:421981	FNDC4	87.5954	8.16601	167.025	20.4537	4.35429	4.65e-16	1.07e-14	Up
CGNC:557,GeneID:768990	TMEM173	199.361	18.642	380.08	20.3884	4.34968	5.91e-59	6.76e-57	Up
CGNC:52216,GeneID:424548	PTGFR	107.138	10.0676	204.208	20.2836	4.34224	1.12e-30	5.52e-29	Up
CGNC:9157,GeneID:424269	PARP9	2384.16	225.093	4543.24	20.1838	4.33513	1.62e-190	9.02e-188	Up
CGNC:4020,GeneID:415996	CACNA2D3	41.305	3.91433	78.6957	20.1045	4.32945	0.000375111	0.00207517	Up
CGNC:3912,GeneID:424467	VCAM1	1998.47	190.291	3806.64	20.0044	4.32224	2.25e-182	1.18e-179	Up
CGNC:62566,GeneID:101749217	P2RX2	411.478	39.6046	783.352	19.7793	4.30592	2.09e-94	3.42e-92	Up
CGNC:52892,GeneID:426820	LOC426820	6506.26	631.81	12380.7	19.5956	4.29246	2.11e-217	1.47e-214	Up
CGNC:9480,GeneID:424314	NMI	3115.23	303.374	5927.09	19.5372	4.28815	1.82e-131	5.43e-129	Up
CGNC:50953,GeneID:419265	HELZ2	5866.38	571.439	11161.3	19.532	4.28776	1.03e-137	3.24e-135	Up
CGNC:9152,GeneID:424266	PARP14	1982.74	194.571	3770.91	19.3807	4.27655	5.66e-179	2.87e-176	Up
CGNC:55756,GeneID:770077	PMAIP1	72.578	7.19993	137.956	19.1607	4.26008	1.26e-25	4.92e-24	Up
CGNC:1367,GeneID:424751	MYO7B	13.0561	1.29711	24.8151	19.1311	4.25785	6.64e-06	5.24e-05	Up
CGNC:66377,GeneID:420552	LOC420552	94.4438	9.45518	179.432	18.9771	4.24619	1.03e-31	5.34e-30	Up
CGNC:66365,GeneID:420189	LY96	91.5135	9.16222	173.865	18.9763	4.24613	1.96e-10	2.89e-09	Up
CGNC:14968,GeneID:417041	TRIM39.2	6.56443	0.660456	12.4684	18.8785	4.23867	0.00198726	0.00930696	Up
CGNC:50536,GeneID:417534	CCLI10	1298.27	130.741	2465.79	18.8602	4.23727	4.07e-25	1.55e-23	Up
CGNC:3609,GeneID:416507	RASD1	934.036	95.5817	1772.49	18.5442	4.2129	2.98e-16	6.92e-15	Up
CGNC:11009,GeneID:431585	C6	342.021	35.0307	649.01	18.5269	4.21155	2.61e-07	2.56e-06	Up
CGNC:49217,GeneID:395220	ORM1	51921.6	5330.12	98513.1	18.4823	4.20808	4.2e-172	2e-169	Up
CGNC:11895,GeneID:374015	FABP1	8874.37	914.242	16834.5	18.4136	4.2027	1.83e-12	3.26e-11	Up
CGNC:9120,GeneID:421600	PRRG4	57.0159	5.87942	108.152	18.395	4.20125	1.68e-20	5.02e-19	Up
CGNC:6428,GeneID:428868	RHOV	6.2083	0.644587	11.772	18.2629	4.19084	0.00302346	0.013478	Up
CGNC:52274,GeneID:424883	PLSCR1	2361.74	246.262	4477.21	18.1807	4.18434	1.32e-161	5.63e-159	Up
CGNC:15517,GeneID:419076	HPX	9180.68	961.305	17400.1	18.1005	4.17795	1.85e-129	5.32e-127	Up
CGNC:5223,GeneID:422268	POF1B	4373.86	458.999	8288.72	18.0583	4.17459	3.71e-29	1.7e-27	Up
CGNC:53487,GeneID:428832	CYP1C1	46.2791	4.903	87.6553	17.8779	4.1601	5.48e-17	1.34e-15	Up
CGNC:66148,GeneID:100859188	GPR132	12.2723	1.31298	23.2315	17.6938	4.14517	0.000290046	0.0016477	Up
CGNC:51250,GeneID:420407	CATH2	30.2684	3.25467	57.2822	17.6	4.1375	1.16e-11	1.91e-10	Up
CGNC:66079,GeneID:100858653	DHX58	319.113	34.4239	603.802	17.5402	4.13259	2.73e-60	3.18e-58	Up
CGNC:52015,GeneID:423644	PCDH15	41.9629	4.54264	79.3832	17.4751	4.12723	0.000161375	0.000962945	Up
CGNC:66076,GeneID:100858173	ALPK1	77.389	8.5343	146.244	17.136	4.09896	2.46e-09	3.19e-08	Up
CGNC:889,GeneID:419401	TMEM52	14.8836	1.6428	28.1244	17.1198	4.09759	2.47e-06	2.09e-05	Up
CGNC:56668,GeneID:771297	SCN4A	8.79325	0.982348	16.6041	16.9025	4.07917	0.000390534	0.0021562	Up
CGNC:839,GeneID:419125	SAMHD1	2552.43	285.353	4819.5	16.8896	4.07807	8.3e-94	1.35e-91	Up
CGNC:1436,GeneID:419618	ZC3H12A	2306.66	258.657	4354.66	16.8356	4.07345	5e-26	1.98e-24	Up
CGNC:8909,GeneID:417938	STRA8	14.4709	1.62693	27.3148	16.7891	4.06945	3.79e-06	3.11e-05	Up
CGNC:49770,GeneID:396364	CHRM3	20.2238	2.28659	38.161	16.6891	4.06083	1.16e-05	8.78e-05	Up
CGNC:65597,GeneID:100857422	POU3F4	5.72863	0.652119	10.8051	16.5693	4.05044	0.0054781	0.0226224	Up
CGNC:50789,GeneID:418554	LOC418554	57.0269	6.5458	107.508	16.424	4.03773	4.96e-10	6.99e-09	Up
CGNC:9694,GeneID:418100	PARP12	1604.97	184.893	3025.05	16.3611	4.0322	1.26e-155	5.26e-153	Up
CGNC:66669,GeneID:771679	CCLI8	8.41003	0.981945	15.8381	16.1293	4.01161	0.000595035	0.00315881	Up
CGNC:53281,GeneID:428140	MATN4	21.8883	2.59341	41.1833	15.88	3.98913	7.3e-06	5.7e-05	Up
CGNC:66595,GeneID:548626	PTX3	123.141	14.7039	231.578	15.7494	3.97723	2.54e-24	9.35e-23	Up
CGNC:54365,GeneID:693260	BF1	3440.53	410.833	6470.23	15.749	3.97719	1.98e-44	1.6e-42	Up
CGNC:13599,GeneID:422810	SOD3	271.333	32.7009	509.965	15.5948	3.963	1.31e-05	9.82e-05	Up
CGNC:119,GeneID:429929	GADD45B	108.718	13.1067	204.329	15.5897	3.96252	6.13e-30	2.93e-28	Up
CGNC:65634,GeneID:100857380	LOC100857380	8.08522	0.98275	15.1877	15.4543	3.94993	0.000877243	0.00446794	Up
CGNC:49947,GeneID:415302	PML	860.249	104.608	1615.89	15.447	3.94926	6.29e-122	1.52e-119	Up
CGNC:10830,GeneID:418294	C1S	8639.48	1051.4	16227.6	15.4343	3.94806	8.27e-38	5.23e-36	Up
CGNC:12065,GeneID:418527	FAM3B	8.07506	0.98275	15.1674	15.4336	3.948	0.000881838	0.00448877	Up
CGNC:14539,GeneID:419181	TP53TG5	15.726	1.9417	29.5103	15.1982	3.92583	2.55e-06	2.15e-05	Up
CGNC:50067,GeneID:415756	LOC415756	530.408	66.174	994.643	15.0307	3.90984	1.42e-24	5.28e-23	Up
CGNC:52441,GeneID:425389	BF2	3125.24	394.5	5855.98	14.8441	3.89181	2.82e-86	4.29e-84	Up
CGNC:13750,GeneID:418867	PHF11	742.603	94.3538	1390.85	14.7408	3.88175	7.82e-112	1.67e-109	Up
GeneID:107050017	LOC107050017	30.5333	3.91392	57.1526	14.6024	3.86813	6.62e-11	1.02e-09	Up
CGNC:4174,GeneID:428150	OGFR	1751.42	224.606	3278.23	14.5955	3.86745	7.98e-150	3.17e-147	Up
CGNC:49283,GeneID:395364	PIT54	225935	28996.2	422874	14.5838	3.86629	1.04e-151	4.23e-149	Up
CGNC:66664,GeneID:771419	ANKRD22	25.4799	3.27687	47.6828	14.5513	3.86308	0.00121049	0.0059918	Up
CGNC:7714,GeneID:421434	CMTR1	3345.34	430.702	6259.99	14.5344	3.8614	9.83e-171	4.56e-168	Up
CGNC:67604,GeneID:101748113	LOC101748113	20.2336	2.62354	37.8437	14.4247	3.85047	1.09e-07	1.14e-06	Up
CGNC:4190,GeneID:396242	COL9A3	27.5135	3.56863	51.4584	14.4196	3.84996	6.03e-10	8.43e-09	Up
CGNC:51805,GeneID:422692	TIFA	74.7592	9.78501	139.733	14.2804	3.83596	5.5e-08	6.01e-07	Up
CGNC:10067,GeneID:426054	IL7R	119.441	15.7168	223.164	14.1991	3.82773	1.02e-05	7.77e-05	Up
CGNC:51108,GeneID:419851	LOC419851	198.863	26.2058	371.52	14.177	3.82548	1.69e-23	5.99e-22	Up
CGNC:11719,GeneID:422902	SLBP	1425.66	189.883	2661.44	14.0162	3.80902	1.55e-138	5.17e-136	Up
CGNC:51439,GeneID:421219	TLR15	22.1596	2.95538	41.3638	13.9961	3.80695	3.16e-08	3.54e-07	Up
CGNC:8237,GeneID:424668	C8H1ORF168	1592.25	213.379	2971.11	13.9241	3.79951	4.24e-58	4.71e-56	Up
CGNC:53177,GeneID:427728	TAP2	1114.59	149.439	2079.73	13.9169	3.79877	3.4e-127	9.46e-125	Up
CGNC:49284,GeneID:395366	GBP	152.963	20.5908	285.336	13.8574	3.79259	3.76e-10	5.35e-09	Up
CGNC:61457,GeneID:100359387	CARNS1	16.9792	2.28739	31.6709	13.8459	3.79138	1.51e-06	1.32e-05	Up
CGNC:56499,GeneID:771089	LOC771089	115.983	15.7235	216.243	13.7529	3.78166	9.72e-33	5.28e-31	Up
CGNC:63764,GeneID:100859374	LOC100859374	19.3609	2.62555	36.0963	13.7481	3.78116	2.79e-07	2.73e-06	Up
CGNC:64367,GeneID:100858732	STAT2	808.143	109.773	1506.51	13.7238	3.77861	1.61e-111	3.4e-109	Up
CGNC:1048,GeneID:768823	NEU2	100.687	13.7739	187.6	13.62	3.76766	1.58e-05	0.000116422	Up
CGNC:12320,GeneID:421945	LPIN1	1185.57	163.403	2207.73	13.511	3.75606	6.38e-110	1.33e-107	Up
CGNC:11174,GeneID:427223	RLN1	9.39944	1.29711	17.5018	13.4929	3.75413	0.000473822	0.00257016	Up
CGNC:49925,GeneID:414832	CYP3A7	2804.87	391.708	5218.02	13.3212	3.73565	0.00158504	0.0076089	Up
CGNC:3147,GeneID:422996	ANO9	18.6856	2.61641	34.7548	13.2834	3.73155	3.44e-05	0.000237531	Up
CGNC:13949,GeneID:770203	WDR86	606.582	85.4115	1127.75	13.2037	3.72287	5.66e-35	3.33e-33	Up
CGNC:49613,GeneID:396025	XDH	4185.06	597.275	7772.84	13.0138	3.70198	7.73e-25	2.91e-23	Up
CGNC:320,GeneID:415855	SPIRE2	141.521	20.2527	262.789	12.9755	3.69772	2.3e-25	8.88e-24	Up
CGNC:14178,GeneID:772372	BDKRB1	15.8719	2.27905	29.4647	12.9285	3.69248	5.31e-06	4.26e-05	Up
CGNC:11684,GeneID:422884	TNIP2	944.893	137.847	1751.94	12.7093	3.66782	3.88e-21	1.21e-19	Up
CGNC:2883,GeneID:419184	SDC4	1049.52	153.157	1945.87	12.705	3.66733	3.74e-118	8.44e-116	Up
CGNC:4808,GeneID:374270	IL16	35.2878	5.2031	65.3724	12.5641	3.65124	1.48e-11	2.43e-10	Up
CGNC:56231,GeneID:770718	LOC770718	214.804	31.7943	397.814	12.5121	3.64526	3.75e-21	1.17e-19	Up
CGNC:55895,GeneID:770263	SLC10A4	26.4195	3.91352	48.9255	12.5017	3.64405	4.9e-09	6.15e-08	Up
GeneID:101752029	THBD	1117.67	166.899	2068.43	12.3933	3.63149	6.56e-99	1.13e-96	Up
CGNC:53260,GeneID:428084	GJA3	133.633	19.9963	247.27	12.3658	3.62828	6.61e-05	0.000431732	Up
CGNC:9502,GeneID:771315	CSF2RB	132.564	19.9609	245.166	12.2823	3.61851	2.37e-34	1.36e-32	Up
CGNC:63304,GeneID:100859853	LOC100859853	279.132	42.2608	516.003	12.2099	3.60999	1.19e-22	4.03e-21	Up
CGNC:49936,GeneID:414877	AvBD13	469.552	71.9354	867.169	12.0548	3.59154	8.01e-14	1.59e-12	Up
GeneID:107050978	LOC107050978	91.2641	14.066	168.462	11.9765	3.58214	3.92e-25	1.5e-23	Up
GeneID:107055390	LOC107055390	50.6272	7.84331	93.411	11.9096	3.57406	2.59e-15	5.64e-14	Up
CGNC:8018,GeneID:395147	EIF2AK2	1603.83	248.611	2959.05	11.9023	3.57317	1.01e-129	2.95e-127	Up
CGNC:64738,GeneID:100858343	CATH3	8.30384	1.28917	15.3185	11.8824	3.57076	0.00450445	0.0191121	Up
CGNC:10177,GeneID:420996	NR4A3	31.1283	4.89748	57.3592	11.712	3.54991	4.15e-10	5.88e-09	Up
CGNC:49473,GeneID:395779	COCH	4155.51	656.151	7654.86	11.6663	3.54428	3.65e-32	1.93e-30	Up
CGNC:56244,GeneID:770734	PRODH	1282.93	203.189	2362.68	11.628	3.53953	1.65e-101	2.99e-99	Up
CGNC:10648,GeneID:396330	IRF7	968.463	153.974	1782.95	11.5796	3.53351	1.08e-108	2.17e-106	Up
CGNC:3053,GeneID:417435	SLC16A6	695.975	112.171	1279.78	11.4091	3.51212	1.38e-05	0.000103019	Up
CGNC:49142,GeneID:378914	CDKN1A	105.334	16.9929	193.674	11.3974	3.51063	1.75e-27	7.53e-26	Up
CGNC:10123,GeneID:422720	TLR3	1441.47	233.769	2649.18	11.3325	3.50239	2.63e-122	6.45e-120	Up
CGNC:11463,GeneID:769974	TMPRSS7	11.9232	1.95676	21.8896	11.1867	3.48371	0.000156798	0.000937305	Up
CGNC:10690,GeneID:427944	CD86	13.9994	2.30205	25.6967	11.1625	3.48059	3.93e-05	0.000267481	Up
GeneID:107056139	LOC107056139	257.621	42.4224	472.82	11.1455	3.47839	1.01e-15	2.24e-14	Up
CGNC:57974,GeneID:776459	PRKCQ	699.455	115.186	1283.72	11.1448	3.4783	8.13e-93	1.29e-90	Up
CGNC:71182,GeneID:101751764	LOC101751764	112.779	18.6015	206.957	11.1258	3.47584	1.21e-28	5.45e-27	Up
CGNC:66302,GeneID:417940	TMEM140	142.771	23.5509	261.992	11.1245	3.47567	1.68e-34	9.76e-33	Up
CGNC:66032,GeneID:100857413	NLRC5	168.233	27.8427	308.623	11.0845	3.47047	4.04e-36	2.46e-34	Up
CGNC:66277,GeneID:417379	CCDC57	37.4947	6.23346	68.7559	11.0301	3.46338	2.04e-11	3.3e-10	Up
CGNC:12568,GeneID:418698	MITD1	448.403	74.7013	822.104	11.0052	3.46012	8.59e-74	1.18e-71	Up
CGNC:11430,GeneID:418404	NFKBIZ	1180.17	196.861	2163.48	10.9898	3.4581	1.11e-109	2.29e-107	Up
CGNC:65057,GeneID:100858010	A2ML4	50203.9	8409.16	91998.7	10.9403	3.45158	1.24e-41	8.78e-40	Up
CGNC:10985,GeneID:421057	SMCHD1	2702.83	453.01	4952.65	10.9328	3.45058	6.11e-138	2e-135	Up
CGNC:53016,GeneID:427201	LOC427201	377.389	63.4902	691.288	10.8881	3.44468	1.13e-39	7.6e-38	Up
CGNC:3566,GeneID:416884	TRAFD1	1815.5	306.663	3324.33	10.8403	3.43834	3.58e-126	9.79e-124	Up
CGNC:49337,GeneID:395472	TCIRG1	1926.7	326.349	3527.06	10.8076	3.43398	4.3e-44	3.4e-42	Up
GeneID:107053353	LOC107053353	5010.69	862.694	9158.68	10.6164	3.40822	3.09e-147	1.2e-144	Up
GeneID:107055625	LOC107055625	15.1238	2.61681	27.6308	10.559	3.4004	2.54e-05	0.000180184	Up
CGNC:8731,GeneID:420667	CMTM6	118.754	20.5674	216.941	10.5478	3.39887	6.29e-29	2.85e-27	Up
CGNC:2041,GeneID:420011	IFI35	3117.02	540.274	5693.77	10.5387	3.39762	7.3e-138	2.34e-135	Up
CGNC:65064,GeneID:100858003	TTC31	1123.73	194.807	2052.65	10.5368	3.39737	6.45e-108	1.28e-105	Up
CGNC:1927,GeneID:419896	SCUBE3	225.969	39.2467	412.691	10.5153	3.39442	9.65e-47	8.22e-45	Up
CGNC:53474,GeneID:428816	LOC428816	9.44523	1.6424	17.2481	10.5017	3.39256	0.00105079	0.0052574	Up
CGNC:3849,GeneID:424807	AP1S3	669.097	116.383	1221.81	10.4982	3.39207	2.78e-42	2.04e-40	Up
CGNC:53134,GeneID:427569	AC108938.5	24.1573	4.29096	44.0237	10.2597	3.35891	1.06e-07	1.11e-06	Up
CGNC:49845,GeneID:396512	FOS	192.545	34.3334	350.757	10.2162	3.35279	3.08e-13	5.88e-12	Up
CGNC:1983,GeneID:396061	FASN	6522.84	1166.74	11878.9	10.1813	3.34785	7.35e-147	2.79e-144	Up
CGNC:49163,GeneID:395072	CHIA	67.0782	12.0867	122.07	10.0995	3.33622	8.47e-06	6.55e-05	Up
CGNC:53274,GeneID:428123	MADPRT	12.4967	2.27152	22.7218	10.0029	3.32235	0.000374214	0.00207174	Up
CGNC:11038,GeneID:395278	GJA1	1129.67	206.59	2052.76	9.93639	3.31272	4.08e-22	1.35e-20	Up
CGNC:71066,GeneID:101751647	LOC101751647	21.4015	3.92226	38.8806	9.91281	3.30929	8.55e-07	7.78e-06	Up
CGNC:50493,GeneID:417345	LOC417345	253.383	46.5762	460.191	9.88038	3.30457	8.03e-10	1.11e-08	Up
CGNC:12098,GeneID:418538	PDE9A	106.446	19.5796	193.313	9.87322	3.30352	7.01e-08	7.52e-07	Up
CGNC:50637,GeneID:417960	GPRC5A	420.37	77.3639	763.377	9.86735	3.30266	1.61e-49	1.44e-47	Up
CGNC:50823,GeneID:418668	LOC418668	2000.14	369.046	3631.24	9.83953	3.29859	5.1e-121	1.22e-118	Up
CGNC:3824,GeneID:424805	SERPINE2	2188.93	405.827	3972.04	9.78754	3.29095	2.34e-05	0.000167353	Up
CGNC:66362,GeneID:420067	PRAM1	17.6387	3.2844	31.9931	9.74091	3.28406	8.48e-06	6.55e-05	Up
CGNC:53547,GeneID:429057	CFHR2	14520	2718.49	26321.6	9.68241	3.27537	8.16e-43	6.14e-41	Up
CGNC:2335,GeneID:419914	TSPO2	1540.1	288.849	2791.36	9.66374	3.27258	1.1e-24	4.11e-23	Up
GeneID:107055430	LOC107055430	12.3036	2.3116	22.2956	9.64512	3.2698	0.000230335	0.00133391	Up
CGNC:65249,GeneID:100857809	LOC100857809	19.1437	3.59956	34.6879	9.63669	3.26854	3.81e-06	3.13e-05	Up
CGNC:51182,GeneID:420107	LOC420107	19.0671	3.59163	34.5425	9.61749	3.26566	4.35e-06	3.54e-05	Up
CGNC:9179,GeneID:770943	SCTR	91.9003	17.3909	166.41	9.56878	3.25834	2.36e-22	7.89e-21	Up
CGNC:3991,GeneID:417647	CA4	22.3578	4.25168	40.4638	9.51713	3.25053	1.27e-05	9.51e-05	Up
CGNC:56142,GeneID:770592	MT3	1197.14	227.723	2166.55	9.51399	3.25005	6.56e-45	5.34e-43	Up
CGNC:49552,GeneID:395921	CNP	1336.3	256.15	2416.46	9.43377	3.23783	0.000109837	0.000680713	Up
GeneID:107055350	LOC107055350	11.9171	2.28739	21.5468	9.4198	3.2357	0.000332285	0.00185732	Up
CGNC:4100,GeneID:424826	PIK3CB	958.893	184.296	1733.49	9.40601	3.23358	1.51e-94	2.49e-92	Up
CGNC:51575,GeneID:421954	NT5C1B	431.984	83.2736	780.695	9.37506	3.22883	5.03e-65	6.04e-63	Up
CGNC:3698,GeneID:373928	PPARG	127.145	24.531	229.758	9.36604	3.22744	1.98e-28	8.79e-27	Up
CGNC:52766,GeneID:426373	MEF2B	11.7705	2.27112	21.2698	9.36533	3.22733	0.000391252	0.00215874	Up
CGNC:12403,GeneID:418624	PIGA	436.381	84.7994	787.963	9.29209	3.216	4.26e-65	5.15e-63	Up
CGNC:51271,GeneID:420503	ARMC3	6.69745	1.31177	12.0831	9.2113	3.2034	0.00903878	0.0347882	Up
CGNC:3115,GeneID:422992	IFITM5	83.1336	16.3609	149.906	9.16245	3.19573	5.32e-20	1.56e-18	Up
CGNC:3933,GeneID:424469	LRRC39	500.422	98.7466	902.098	9.13548	3.19148	1.98e-69	2.58e-67	Up
CGNC:2156,GeneID:425954	SLC2A6	102.515	20.305	184.725	9.09752	3.18547	1.87e-09	2.47e-08	Up
CGNC:66162,GeneID:100859797	ACKR4	248.972	49.3776	448.565	9.08439	3.18339	2.07e-08	2.36e-07	Up
CGNC:49136,GeneID:378903	CREM	999.943	200.077	1799.81	8.99556	3.16921	9.55e-23	3.27e-21	Up
CGNC:9155,GeneID:424267	DTX3L	1569.39	316.133	2822.65	8.92868	3.15845	3.19e-106	6.12e-104	Up
CGNC:9356,GeneID:693250	H1F0	1653.4	333.191	2973.61	8.92463	3.15779	8.04e-49	7.03e-47	Up
CGNC:2160,GeneID:417561	SERPINF1	1816.72	367.208	3266.22	8.89476	3.15296	3.15e-27	1.33e-25	Up
CGNC:5957,GeneID:395312	IL18	925.911	188.55	1663.27	8.82136	3.141	1.23e-42	9.16e-41	Up
CGNC:51112,GeneID:419872	MOV10	3435.88	699.687	6172.06	8.82118	3.14097	4.91e-123	1.26e-120	Up
CGNC:8290,GeneID:428753	PRKG2	89.4836	18.3134	160.654	8.77247	3.13298	8.16e-10	1.12e-08	Up
CGNC:6282,GeneID:414795	VSIG1	11.1255	2.27946	19.9715	8.76153	3.13118	0.00771302	0.0304348	Up
CGNC:65761,GeneID:100857244	TOPAZ1	262.347	53.8341	470.859	8.74649	3.1287	1.34e-24	4.98e-23	Up
CGNC:11872,GeneID:374246	NBN	1111.02	228.001	1994.03	8.74571	3.12858	4.4e-29	2.01e-27	Up
CGNC:50706,GeneID:418221	ENDOUL	14.328	2.94664	25.7093	8.72496	3.12515	0.000120196	0.000738336	Up
CGNC:50578,GeneID:417723	CCDC146	11.0462	2.27192	19.8204	8.72406	3.125	0.000789638	0.0040741	Up
CGNC:8763,GeneID:417926	APAF1	1251.62	258.153	2245.08	8.6967	3.12047	1.09e-97	1.84e-95	Up
CGNC:10414,GeneID:378783	KIT	71.1009	14.675	127.527	8.6901	3.11937	5.19e-17	1.27e-15	Up
CGNC:51365,GeneID:420896	SERPINB2	67.7189	14.0748	121.363	8.62275	3.10815	0.00115851	0.00576182	Up
CGNC:53224,GeneID:427913	SLC41A2	229.004	47.6267	410.38	8.6166	3.10712	2.17e-41	1.53e-39	Up
CGNC:65416,GeneID:100857615	LOC100857615	50.3565	10.4994	90.2135	8.59225	3.10304	1.03e-12	1.87e-11	Up
CGNC:55722,GeneID:770026	LOC770026	62.6083	13.0782	112.138	8.57449	3.10005	3.61e-15	7.74e-14	Up
CGNC:52639,GeneID:425998	MRGPRH	10.9157	2.29412	19.5373	8.51625	3.09022	0.000921246	0.00466802	Up
CGNC:49004,GeneID:374012	BIRC2	6903.78	1450.95	12356.6	8.51625	3.09022	7.72e-52	7.37e-50	Up
CGNC:9977,GeneID:418198	C3AR1	84.0348	17.7299	150.34	8.47946	3.08397	2.46e-05	0.000174905	Up
CGNC:66335,GeneID:419112	LOC419112	30.9006	6.55414	55.2471	8.42934	3.07542	2.03e-08	2.32e-07	Up
CGNC:1831,GeneID:424360	RGS1	7.68728	1.6416	13.733	8.36561	3.06447	0.00628665	0.025588	Up
CGNC:10201,GeneID:396323	VIP	42.9415	9.17136	76.7116	8.36426	3.06424	6.81e-08	7.33e-07	Up
CGNC:12145,GeneID:420324	LRRC6	24.4851	5.2491	43.7211	8.32926	3.05819	6.16e-07	5.71e-06	Up
GeneID:107049468	LOC107049468	81.2128	17.6581	144.768	8.19839	3.03534	1.62e-08	1.88e-07	Up
CGNC:5421,GeneID:417247	TNFSF15	25.3456	5.53373	45.1575	8.16041	3.02864	5.26e-07	4.95e-06	Up
CGNC:57485,GeneID:772360	LOC772360	106.543	23.5328	189.554	8.05489	3.00986	4.25e-06	3.47e-05	Up
CGNC:56239,GeneID:770729	SPINK2	16.1186	3.61423	28.623	7.91952	2.98541	7.42e-05	0.000479538	Up
CGNC:49227,GeneID:395243	IRF9	302.351	68.4683	536.234	7.83186	2.96935	1.87e-46	1.58e-44	Up
CGNC:55088,GeneID:769230	PCSK1	183.084	41.8025	324.365	7.75947	2.95596	4.7e-07	4.47e-06	Up
CGNC:4924,GeneID:395342	CRTAM	8.59433	1.96389	15.2248	7.75235	2.95463	0.00498777	0.0208607	Up
CGNC:63875,GeneID:100859257	P2RY11	35.2673	8.17314	62.3615	7.63006	2.93169	8.42e-09	1.02e-07	Up
CGNC:58018,GeneID:776507	LOC776507	18.26	4.26755	32.2525	7.55761	2.91793	3.27e-05	0.000226824	Up
CGNC:1291,GeneID:428184	SCNN1D	12.5336	2.93198	22.1353	7.5496	2.9164	0.00064542	0.00339524	Up
CGNC:50457,GeneID:417185	ASS1	405.832	95.3689	716.295	7.51079	2.90896	1.79e-53	1.75e-51	Up
CGNC:22035,GeneID:420838	CD83	147.267	34.6505	259.883	7.50012	2.90691	1.16e-06	1.03e-05	Up
CGNC:64350,GeneID:100858751	LOC100858751	388.879	91.8174	685.942	7.47071	2.90125	8.98e-15	1.87e-13	Up
CGNC:50117,GeneID:415932	SEMA3DL	52.6977	12.4732	92.9221	7.44972	2.89719	4.98e-12	8.51e-11	Up
CGNC:2580,GeneID:419932	BTG2	4053.66	961.042	7146.29	7.43597	2.89452	1.64e-99	2.85e-97	Up
CGNC:12946,GeneID:396338	MTNR1B	12.3137	2.94785	21.6796	7.35437	2.8786	0.003588	0.0156779	Up
CGNC:9464,GeneID:427908	C1QTNF6	784.978	187.923	1382.03	7.35425	2.87858	5.91e-62	7e-60	Up
CGNC:11850,GeneID:418496	EVA1C	39.5702	9.50831	69.6321	7.32328	2.87249	1.92e-09	2.52e-08	Up
CGNC:6303,GeneID:417030	SDSL	51.8078	12.457	91.1586	7.31789	2.87143	1.7e-09	2.24e-08	Up
CGNC:51549,GeneID:421845	FAM46A	3547.64	853.077	6242.2	7.31728	2.87131	2.94e-106	5.7e-104	Up
CGNC:51239,GeneID:420368	LOC420368	114.115	27.4907	200.739	7.3021	2.86831	4.55e-22	1.5e-20	Up
CGNC:4895,GeneID:769528	GRAMD1B	785.704	190.121	1381.29	7.26531	2.86102	6.07e-72	8.05e-70	Up
CGNC:2009,GeneID:415349	PSTPIP1	56.265	13.7231	98.8068	7.20001	2.848	2.23e-12	3.94e-11	Up
CGNC:52350,GeneID:425113	CHIR-IG1-5	10.7504	2.63309	18.8677	7.16563	2.84109	0.00202624	0.00946561	Up
CGNC:50008,GeneID:415531	SLC51B	2138.74	524.554	3752.93	7.15451	2.83885	1.96e-56	2.06e-54	Up
GeneID:101749459	ARID5A	498.736	122.462	875.009	7.14512	2.83696	1.26e-57	1.37e-55	Up
CGNC:66141,GeneID:100858838	PIM1	328.423	80.8102	576.035	7.12824	2.83355	2.19e-45	1.81e-43	Up
CGNC:52008,GeneID:423629	LOC423629	3482.14	860.208	6104.07	7.09604	2.82701	2.15e-39	1.42e-37	Up
CGNC:50997,GeneID:419425	LOC419425	10.5229	2.60928	18.4365	7.06573	2.82084	0.00242631	0.0110894	Up
CGNC:65426,GeneID:100857605	RNF24	148.706	36.9467	260.465	7.04975	2.81757	2.93e-26	1.19e-24	Up
CGNC:3950,GeneID:420393	ACKR2	27.7669	6.89943	48.6343	7.04903	2.81743	5.99e-07	5.57e-06	Up
CGNC:10835,GeneID:396212	MT4	19787	4927.96	34646.1	7.03052	2.81363	5.29e-24	1.93e-22	Up
CGNC:49929,GeneID:414838	CYP11A1	7.84753	1.95676	13.7383	7.02094	2.81166	0.00987422	0.0374597	Up
CGNC:63993,GeneID:100859134	LOC100859134	63.8732	16.0157	111.731	6.97635	2.80247	3.96e-12	6.85e-11	Up
CGNC:52063,GeneID:423849	LOC423849	126.523	31.7709	221.275	6.96472	2.80007	5.66e-20	1.66e-18	Up
CGNC:5080,GeneID:419106	GATA3	32.3268	8.13508	56.5186	6.94751	2.7965	1.06e-07	1.1e-06	Up
CGNC:50204,GeneID:416235	SPINK5	116218	29276.5	203159	6.93932	2.79479	9.12e-117	2e-114	Up
CGNC:55442,GeneID:769673	ERNI	28.6451	7.23719	50.053	6.91608	2.78995	0.00127869	0.00628283	Up
CGNC:11860,GeneID:420215	RIPK2	416.931	105.353	728.51	6.91497	2.78972	3.14e-07	3.05e-06	Up
CGNC:64025,GeneID:100859097	LOC100859097	74.5577	18.9802	130.135	6.85638	2.77745	5.08e-15	1.07e-13	Up
CGNC:1113,GeneID:419873	PPM1J	249.998	64.159	435.837	6.79307	2.76406	7.6e-37	4.7e-35	Up
CGNC:64512,GeneID:100858581	LOC100858581	342.478	87.8975	597.058	6.79266	2.76398	2.25e-20	6.71e-19	Up
CGNC:65903,GeneID:100873158	NAB2	11.4485	2.95458	19.9425	6.7497	2.75482	0.00189715	0.00893761	Up
CGNC:12590,GeneID:374136	IL1RL1	332.646	86.0462	579.245	6.7318	2.75099	2.03e-05	0.000146449	Up
GeneID:107049125	LOC107049125	8.86372	2.29412	15.4333	6.72734	2.75004	0.00666221	0.0268418	Up
CGNC:49500,GeneID:395827	CYP24A1	8.86372	2.29492	15.4325	6.72464	2.74946	0.00666219	0.0268418	Up
CGNC:57042,GeneID:771782	RAB7B	115.934	30.1456	201.723	6.69163	2.74236	9.54e-14	1.88e-12	Up
CGNC:49280,GeneID:395354	CBX4	455.78	119.234	792.326	6.64516	2.7323	8.07e-52	7.66e-50	Up
CGNC:210,GeneID:428201	STC1	17.4531	4.57438	30.3318	6.6308	2.72918	0.000124234	0.000761156	Up
CGNC:12833,GeneID:418923	MTUS2	18.4681	4.86534	32.0708	6.59169	2.72065	8.69e-05	0.000551517	Up
CGNC:68079,GeneID:101748596	LOC101748596	8.70955	2.29492	15.1242	6.59027	2.72034	0.00776786	0.0306094	Up
CGNC:7889,GeneID:771938	ESRRB	11.1887	2.95538	19.4221	6.57178	2.71628	0.00228439	0.0105058	Up
CGNC:9884,GeneID:373965	CALD1	5356.21	1415.81	9296.61	6.56629	2.71508	4.71e-101	8.37e-99	Up
CGNC:9875,GeneID:420935	ADCY2	61.4327	16.2451	106.62	6.56321	2.7144	3.62e-05	0.000248838	Up
CGNC:50031,GeneID:415634	GPR114	17.3222	4.59778	30.0467	6.53504	2.7082	0.000142708	0.00086234	Up
CGNC:4877,GeneID:424862	SLCO2A1	1907.91	508.665	3307.15	6.50163	2.7008	1.29e-38	8.33e-37	Up
CGNC:494,GeneID:425657	CTSS	927.384	247.269	1607.5	6.50103	2.70067	1.19e-38	7.7e-37	Up
CGNC:51335,GeneID:420747	RP9	551.446	147.293	955.599	6.48774	2.69772	4.8e-41	3.34e-39	Up
CGNC:50176,GeneID:416149	ARHGEF37	28.0053	7.48255	48.528	6.48548	2.69721	1.51e-06	1.32e-05	Up
CGNC:53738,GeneID:429681	GIMAP1	226.604	60.6563	392.551	6.47173	2.69415	3.24e-33	1.78e-31	Up
GeneID:107049603	LOC107049603	13.4378	3.61383	23.2617	6.43687	2.68636	0.000908504	0.00461045	Up
CGNC:7902,GeneID:101749627	P2RY14	29.1173	7.84291	50.3917	6.42512	2.68372	9.56e-07	8.67e-06	Up
CGNC:6397,GeneID:416693	NET1	1361.49	368.018	2354.97	6.39905	2.67786	5.5e-24	2e-22	Up
CGNC:50224,GeneID:416324	ACSL6	39.8423	10.8189	68.8656	6.36532	2.67023	1.28e-08	1.51e-07	Up
CGNC:21041,GeneID:417171	NTNG2	15.4693	4.22035	26.7183	6.33082	2.66239	0.00120363	0.0059649	Up
CGNC:6614,GeneID:417747	ZNF800	819.705	223.673	1415.74	6.32951	2.66209	1.2e-19	3.45e-18	Up
CGNC:4557,GeneID:416296	RASGEF1C	191.751	52.353	331.15	6.32533	2.66114	0.000219348	0.00127382	Up
GeneID:107049477	POU6F1	24.9704	6.8689	43.0718	6.27056	2.64859	7.05e-06	5.53e-05	Up
CGNC:1563,GeneID:386580	PTPRC	191.843	52.9786	330.707	6.24228	2.64207	1.33e-28	5.95e-27	Up
CGNC:6419,GeneID:423885	SORCS1	71.8182	19.8594	123.777	6.23268	2.63985	2.87e-05	0.000200704	Up
CGNC:5938,GeneID:395666	CD44	231.537	64.0738	399	6.22719	2.63858	1.77e-32	9.52e-31	Up
CGNC:1424,GeneID:769024	GPR17	31.6444	8.77213	54.5166	6.21475	2.6357	0.000305069	0.00172308	Up
CGNC:12743,GeneID:418845	SLC25A30	614.066	170.235	1057.9	6.21433	2.6356	2.52e-48	2.19e-46	Up
CGNC:51015,GeneID:419498	GUCA2B	54.1429	15.0567	93.2291	6.19187	2.63037	0.00386362	0.016716	Up
CGNC:51519,GeneID:421662	TAGAP	16.3883	4.55891	28.2178	6.18958	2.62984	0.000308812	0.00174128	Up
CGNC:2234,GeneID:417398	TMEM100	196.492	54.8441	338.14	6.16547	2.62421	2.81e-18	7.48e-17	Up
CGNC:17006,GeneID:419771	IL10RA	14.0404	3.92186	24.1589	6.16008	2.62295	0.000865239	0.0044164	Up
CGNC:50430,GeneID:427746	YF5	92.2311	25.8047	158.658	6.1484	2.62021	2.55e-16	5.97e-15	Up
CGNC:48962,GeneID:373931	EGR1	1561.12	437.756	2684.48	6.13237	2.61645	3.28e-08	3.67e-07	Up
CGNC:49637,GeneID:396069	GLRX	189.932	53.296	326.568	6.12743	2.61528	3.21e-26	1.29e-24	Up
CGNC:49832,GeneID:396488	CNTF	104.556	29.4486	179.663	6.10091	2.60902	7.4e-18	1.93e-16	Up
CGNC:15732,GeneID:428363	XKR9	48.8656	13.7743	83.957	6.09521	2.60768	1.25e-09	1.67e-08	Up
CGNC:4801,GeneID:423789	LIPA	1388.56	393.177	2383.94	6.06328	2.6001	1.84e-74	2.54e-72	Up
CGNC:49371,GeneID:395550	LY6E	24481.6	6962.76	42000.4	6.03215	2.59267	9.84e-101	1.73e-98	Up
CGNC:54388,GeneID:768350	LOC768350	96.4778	27.4435	165.512	6.03102	2.5924	1.26e-16	3.01e-15	Up
CGNC:2536,GeneID:395977	GFI1B	135.668	38.6137	232.722	6.02694	2.59143	7.06e-21	2.16e-19	Up
CGNC:49018,GeneID:374044	HK2	604.139	172.204	1036.07	6.01654	2.58894	2.04e-54	2.05e-52	Up
CGNC:51929,GeneID:423233	CAPN3	11.4945	3.27687	19.7121	6.01553	2.58869	0.00495039	0.0207251	Up
CGNC:50728,GeneID:418295	C1R	6965.75	1994.95	11936.5	5.98337	2.58096	2.82e-86	4.29e-84	Up
CGNC:10374,GeneID:396409	PTPN2	2825.19	816.584	4833.79	5.91953	2.56548	1.2e-30	5.91e-29	Up
CGNC:50422,GeneID:417051	DMB2	31.484	9.14715	53.8208	5.88388	2.55677	1.01e-06	9.11e-06	Up
CGNC:8366,GeneID:428432	OSBPL3	75.1452	21.8812	128.409	5.86847	2.55298	2.37e-13	4.55e-12	Up
GeneID:107055200	LOC107055200	18.0402	5.25824	30.8222	5.8617	2.55132	0.000201395	0.00117446	Up
CGNC:49404,GeneID:395615	SHH	105.025	30.6847	179.365	5.84542	2.54731	5.42e-06	4.35e-05	Up
CGNC:7713,GeneID:771985	PTPRR	269.716	78.8423	460.59	5.84191	2.54644	0.000299573	0.00169587	Up
CGNC:66265,GeneID:416699	LRGUK	10.0871	2.96331	17.211	5.80802	2.53805	0.00648446	0.0262842	Up
CGNC:64661,GeneID:100858424	IL34	108.24	31.8126	184.668	5.80487	2.53726	1.38e-17	3.53e-16	Up
CGNC:50861,GeneID:418825	PCDH17	54.049	15.9086	92.1895	5.79495	2.5348	4.28e-10	6.05e-09	Up
CGNC:56580,GeneID:771186	TEX12	11.0485	3.2614	18.8356	5.7753	2.5299	0.00445438	0.0189286	Up
CGNC:1956,GeneID:426846	LIPG	139.287	41.1825	237.392	5.76439	2.52717	6.15e-21	1.89e-19	Up
GeneID:107051505	LOC107051505	18.7105	5.54126	31.8798	5.75317	2.52436	0.000205187	0.00119449	Up
CGNC:52992,GeneID:427122	ERAP1	3337.76	991.595	5683.92	5.7321	2.51906	3.25e-84	4.81e-82	Up
CGNC:3124,GeneID:770601	B4GALNT4	788.536	235.692	1341.38	5.69125	2.50875	6.03e-58	6.67e-56	Up
CGNC:66245,GeneID:415988	SUSD3	119.355	35.732	202.977	5.68055	2.50603	1.02e-18	2.84e-17	Up
CGNC:52687,GeneID:426132	GSDMA	63.517	19.0325	108.002	5.67458	2.50451	1.8e-10	2.66e-09	Up
CGNC:49585,GeneID:395974	IKZF1	53.5302	16.0621	90.9983	5.66542	2.50218	6.2e-10	8.63e-09	Up
CGNC:10731,GeneID:426340	TAPBPL	195.207	58.6864	331.728	5.65257	2.49891	1.49e-26	6.17e-25	Up
CGNC:49153,GeneID:386574	NFKB2	590.024	177.469	1002.58	5.6493	2.49807	8.53e-51	7.79e-49	Up
CGNC:66403,GeneID:421369	ATF3	254.909	76.8	433.019	5.63827	2.49525	4.6e-09	5.78e-08	Up
CGNC:4445,GeneID:420420	MYD88	862.635	260.305	1464.97	5.62788	2.49259	2.05e-59	2.38e-57	Up
CGNC:65466,GeneID:100857562	TRIM2	543.808	164.248	923.367	5.62178	2.49103	5.5e-05	0.000364009	Up
CGNC:57828,GeneID:776306	TARP	20.5265	6.21558	34.8375	5.60486	2.48668	0.000105381	0.000656263	Up
GeneID:107050945	LOC107050945	75.5735	22.8905	128.257	5.60305	2.48621	6.31e-13	1.17e-11	Up
CGNC:49899,GeneID:408046	KIF5C	201.248	61.0179	341.479	5.59636	2.48449	1.47e-10	2.18e-09	Up
CGNC:6070,GeneID:417048	TAPBP	1386.76	423.616	2349.91	5.54727	2.47178	3.21e-68	4.06e-66	Up
CGNC:1613,GeneID:395335	CISH	212.6	65.0418	360.158	5.53733	2.46919	1.35e-21	4.3e-20	Up
CGNC:11994,GeneID:427984	KCNJ15	70.5972	21.6065	119.588	5.53481	2.46853	4e-12	6.92e-11	Up
CGNC:49901,GeneID:408048	PCDH10	61.3151	18.8239	103.806	5.5146	2.46326	7.06e-05	0.000458252	Up
CGNC:50574,GeneID:417707	NAMPT	17461.3	5363.31	29559.3	5.51139	2.46242	2.23e-78	3.18e-76	Up
CGNC:2012,GeneID:424001	MAP2	234.748	72.2161	397.28	5.50127	2.45976	8.32e-09	1.01e-07	Up
CGNC:66469,GeneID:424312	RND3	1187.39	365.759	2009.01	5.49272	2.45752	2.15e-07	2.15e-06	Up
CGNC:67300,GeneID:101747807	LOC101747807	59.029	18.3193	99.7388	5.44446	2.44479	2.28e-10	3.32e-09	Up
CGNC:65111,GeneID:100857954	MPEG1	550.085	170.99	929.18	5.43411	2.44204	2.6e-47	2.22e-45	Up
CGNC:49707,GeneID:396221	LDHA	27604.9	8599.86	46610	5.41985	2.43825	6.78e-91	1.07e-88	Up
CGNC:6492,GeneID:423888	MXI1	864.683	269.393	1459.97	5.4195	2.43816	2.58e-57	2.8e-55	Up
CGNC:3259,GeneID:395090	TNFRSF8	35.706	11.1361	60.2759	5.41268	2.43634	6.42e-07	5.94e-06	Up
CGNC:1052,GeneID:419993	CALCOCO2	2859.93	892.991	4826.86	5.40528	2.43437	1.28e-77	1.79e-75	Up
CGNC:5004,GeneID:418647	TMEM243	63.6839	19.9074	107.46	5.39802	2.43243	6.03e-11	9.34e-10	Up
CGNC:11602,GeneID:422866	ABLIM2	75.9395	23.7999	128.079	5.38149	2.42801	7.97e-06	6.2e-05	Up
CGNC:14468,GeneID:770108	STARD5	318.11	99.7962	536.424	5.37519	2.42632	8.31e-35	4.87e-33	Up
CGNC:49896,GeneID:408043	LAMC2	18.9161	5.94089	31.8913	5.3681	2.42441	0.000258789	0.00148276	Up
CGNC:70199,GeneID:101750757	LOC101750757	12.3534	3.89886	20.808	5.33694	2.41601	0.00371114	0.0161525	Up
CGNC:70068,GeneID:101750621	LOC101750621	54.8517	17.373	92.3303	5.31458	2.40996	1.18e-07	1.22e-06	Up
CGNC:20428,GeneID:414845	CDH3	281.444	89.2109	473.678	5.30964	2.40862	7.59e-32	3.95e-30	Up
CGNC:541,GeneID:419844	RASSF5	123.486	39.221	207.751	5.29694	2.40516	3.47e-07	3.34e-06	Up
CGNC:49662,GeneID:396126	INHBB	46.1118	14.6591	77.5645	5.29122	2.4036	2.49e-08	2.82e-07	Up
CGNC:49401,GeneID:395612	GSTA4	340.342	108.447	572.238	5.27668	2.39963	4.96e-23	1.72e-21	Up
CGNC:52234,GeneID:424673	JUN	1206.23	384.644	2027.82	5.27193	2.39833	6.78e-56	7.08e-54	Up
CGNC:51486,GeneID:421438	NFKBIE	56.2059	17.9887	94.4231	5.24903	2.39205	1.08e-09	1.46e-08	Up
GeneID:107051858	LOC107051858	60.8061	19.5887	102.024	5.20829	2.38081	1.11e-06	9.89e-06	Up
CGNC:4745,GeneID:416585	IL4R	465.683	150.206	781.159	5.20057	2.37867	1.62e-26	6.66e-25	Up
CGNC:10330,GeneID:421672	HIVEP2	448.46	144.946	751.975	5.18796	2.37517	8.26e-41	5.67e-39	Up
CGNC:52679,GeneID:426106	LOC426106	40.3481	13.0619	67.6344	5.178	2.3724	2.29e-07	2.28e-06	Up
GeneID:107055352	MIDN	483.265	156.534	809.996	5.17459	2.37144	5.34e-33	2.91e-31	Up
CGNC:66306,GeneID:418108	ZC3HAV1L	373.349	121.212	625.487	5.16027	2.36745	2.1e-27	8.97e-26	Up
CGNC:10056,GeneID:430480	IKBKE	403.295	131.296	675.295	5.14332	2.3627	1.35e-08	1.59e-07	Up
CGNC:2242,GeneID:419155	CBFA2T2	56.9256	18.6487	95.2024	5.10503	2.35192	5.31e-07	5e-06	Up
CGNC:20229,GeneID:395828	CHRD	180.334	59.1526	301.516	5.09726	2.34972	4.16e-15	8.83e-14	Up
CGNC:879,GeneID:419400	C21H1ORF222	144.34	47.4286	241.251	5.08661	2.3467	1.34e-17	3.45e-16	Up
CGNC:63442,GeneID:100859707	IL2RB	16.9285	5.56305	28.2939	5.08604	2.34654	0.000845056	0.0043266	Up
CGNC:51276,GeneID:420526	FAM188A	1137.51	374.115	1900.91	5.0811	2.34514	2.02e-51	1.9e-49	Up
CGNC:49047,GeneID:374111	CELF2	129.901	42.7439	217.057	5.07808	2.34428	7.49e-18	1.95e-16	Up
GeneID:107049144	LOC107049144	24.8992	8.20287	41.5956	5.07086	2.34223	4.82e-05	0.000321976	Up
CGNC:51940,GeneID:423277	LOC423277	167.103	55.0686	279.137	5.0689	2.34167	4.43e-18	1.17e-16	Up
CGNC:10587,GeneID:418236	PARVG	94.8734	31.3875	158.359	5.0453	2.33494	1.41e-13	2.75e-12	Up
CGNC:181,GeneID:421160	LAD1	68.9507	22.91	114.992	5.01928	2.32748	6.79e-11	1.04e-09	Up
CGNC:1331,GeneID:419424	TNFRSF18	83.8231	27.8661	139.78	5.01614	2.32658	0.00142164	0.00691396	Up
CGNC:63733,GeneID:100859408	LOC100859408	269.452	89.6406	449.263	5.01182	2.32533	4.57e-18	1.21e-16	Up
CGNC:52286,GeneID:424917	LOC424917	23.3405	7.82112	38.8599	4.96859	2.31284	0.000112634	0.00069572	Up
CGNC:51252,GeneID:420412	MYO1G	26.2623	8.80306	43.7215	4.96662	2.31226	4e-05	0.000271375	Up
CGNC:57368,GeneID:772212	SELPLG	13.6218	4.58904	22.6545	4.93665	2.30353	0.00337863	0.014872	Up
CGNC:65132,GeneID:100857932	LOC100857932	304.65	102.839	506.462	4.92482	2.30007	1.26e-12	2.28e-11	Up
CGNC:66220,GeneID:396093	NFKBIA	1781.31	601.358	2961.25	4.92428	2.29991	7.63e-25	2.88e-23	Up
CGNC:6509,GeneID:423890	DUSP5	208.512	70.4499	346.575	4.91945	2.2985	2.06e-15	4.49e-14	Up
CGNC:10406,GeneID:426315	ZC3HAV1	3582.14	1210.38	5953.91	4.91905	2.29838	1.12e-72	1.52e-70	Up
GeneID:107049909	LOC107049909	21.2807	7.20425	35.3571	4.90781	2.29508	0.000232997	0.00134699	Up
CGNC:49673,GeneID:396152	RUNX1	69.1727	23.4939	114.852	4.88857	2.28941	1.12e-10	1.68e-09	Up
CGNC:1510,GeneID:395301	KCNMB1	82.3029	28.0162	136.59	4.87537	2.28551	3.4e-05	0.000234884	Up
CGNC:58419,GeneID:776920	SIGLEC1	21.0447	7.16779	34.9216	4.87202	2.28452	0.000295691	0.00167578	Up
GeneID:107051174	LOC107051174	39.4307	13.4393	65.4221	4.86797	2.28332	7.2e-07	6.63e-06	Up
CGNC:49309,GeneID:395417	SIK1	575.918	196.582	955.253	4.8593	2.28075	4.01e-10	5.7e-09	Up
CGNC:12973,GeneID:419030	USP35	15.3517	5.24156	25.4618	4.85767	2.28026	0.00187083	0.00883103	Up
CGNC:49433,GeneID:395695	AKAP9	2840.85	971.691	4710.02	4.84724	2.27716	7.24e-69	9.23e-67	Up
CGNC:51388,GeneID:421035	SLMO1	97.8675	33.4751	162.26	4.84718	2.27714	7.01e-14	1.4e-12	Up
CGNC:5325,GeneID:416065	PXK	1017.54	349.033	1686.05	4.83064	2.27221	6.28e-54	6.2e-52	Up
CGNC:7151,GeneID:421333	DISP1	1078.39	373.725	1783.05	4.77103	2.2543	8.44e-24	3.04e-22	Up
CGNC:50302,GeneID:416633	LOC416633	22.6562	7.87304	37.4393	4.75538	2.24956	0.000189805	0.00111348	Up
CGNC:63861,GeneID:100859272	LOC100859272	16.8431	5.85522	27.8309	4.75318	2.24889	0.00132924	0.0065006	Up
CGNC:11706,GeneID:418471	USP25	1321.38	459.552	2183.21	4.75074	2.24815	2.88e-57	3.1e-55	Up
CGNC:16864,GeneID:419860	G0S2	576.208	200.439	951.977	4.74946	2.24776	2.46e-12	4.32e-11	Up
CGNC:11096,GeneID:427207	GCNT4	12.1966	4.24295	20.1502	4.74912	2.24766	0.00663978	0.0267708	Up
CGNC:9191,GeneID:395488	MARCO	710.939	247.501	1174.38	4.74494	2.24639	4.86e-21	1.5e-19	Up
CGNC:5801,GeneID:395581	HTR2B	28.8972	10.0906	47.7038	4.72753	2.24109	2.78e-05	0.00019489	Up
CGNC:51210,GeneID:420216	SLC7A7	219.585	76.6801	362.49	4.7273	2.24102	1.75e-08	2.02e-07	Up
CGNC:11391,GeneID:427279	LNPEP	1116.69	390.335	1843.05	4.72171	2.23931	5.11e-54	5.11e-52	Up
CGNC:2279,GeneID:417401	TRIM25	4848.35	1695.13	8001.56	4.72033	2.23889	1.62e-71	2.13e-69	Up
CGNC:6546,GeneID:417257	TOR4A	203.917	71.5321	336.302	4.70142	2.2331	7.97e-23	2.75e-21	Up
CGNC:8516,GeneID:424704	IL23R	13.0396	4.57478	21.5044	4.70063	2.23285	0.00517023	0.0215429	Up
CGNC:4487,GeneID:417678	SLC13A5	472.6	165.975	779.224	4.69482	2.23107	7.37e-38	4.69e-36	Up
CGNC:51170,GeneID:420061	BTN1A1	41.0556	14.43	67.6812	4.69031	2.22968	7.19e-07	6.62e-06	Up
CGNC:53180,GeneID:427737	YF6	74.7294	26.2752	123.184	4.6882	2.22903	6.74e-11	1.03e-09	Up
CGNC:10370,GeneID:421684	TNFAIP3	228.104	80.3174	375.891	4.68007	2.22653	1.99e-08	2.28e-07	Up
CGNC:7562,GeneID:101752041	LRRC19	19.4069	6.83756	31.9763	4.67656	2.22545	0.00631713	0.0257058	Up
CGNC:52658,GeneID:426049	CTSG	28.9485	10.1993	47.6976	4.67656	2.22545	2.75e-05	0.000193181	Up
CGNC:8663,GeneID:422624	SARAF	1892.48	666.822	3118.13	4.67611	2.22531	3.18e-34	1.82e-32	Up
GeneID:107050538	LOC107050538	26.7825	9.46312	44.1018	4.66039	2.22045	6.22e-05	0.000408016	Up
CGNC:51165,GeneID:420050	CERS4	151.022	53.4185	248.626	4.6543	2.21857	1.76e-07	1.78e-06	Up
CGNC:52020,GeneID:423668	RSFR	67.5528	23.9538	111.152	4.64027	2.21421	5.4e-10	7.59e-09	Up
CGNC:67156,GeneID:101747660	LOC101747660	163.934	58.3824	269.485	4.61587	2.2066	2.78e-19	7.89e-18	Up
CGNC:49346,GeneID:395496	SLC5A1	23.6039	8.43397	38.7738	4.59733	2.2008	0.00605416	0.0247503	Up
CGNC:64882,GeneID:100858196	LOC100858196	19.9811	7.16066	32.8015	4.58079	2.1956	0.000749259	0.00388739	Up
GeneID:107051241	LOC107051241	87.7201	31.451	143.989	4.57821	2.19478	4.68e-12	8.03e-11	Up
CGNC:66353,GeneID:419852	CD55	376.792	135.181	618.404	4.57465	2.19366	2.78e-23	9.78e-22	Up
CGNC:8494,GeneID:395820	DLL1	214.105	76.8693	351.341	4.57063	2.19239	1.36e-16	3.25e-15	Up
CGNC:5074,GeneID:770226	GNAZ	22.7121	8.16561	37.2586	4.56287	2.18994	0.000257591	0.00147727	Up
CGNC:69112,GeneID:101749651	LOC101749651	353.425	127.592	579.258	4.53992	2.18267	2.45e-13	4.69e-12	Up
CGNC:12313,GeneID:421939	ATP6V1C2	40.7225	14.7071	66.738	4.53781	2.182	1.35e-06	1.19e-05	Up
CGNC:49782,GeneID:396385	IRF8	1379.33	498.2	2260.47	4.53727	2.18182	4.7e-55	4.82e-53	Up
CGNC:4214,GeneID:395105	CRHR2	943.362	341.424	1545.3	4.52604	2.17825	7.4e-49	6.5e-47	Up
CGNC:8939,GeneID:769889	APOLD1	126.468	45.8049	207.131	4.52203	2.17697	1.34e-15	2.96e-14	Up
CGNC:1968,GeneID:395383	SLC16A3	103.484	37.5233	169.445	4.51572	2.17496	3.93e-05	0.000267685	Up
CGNC:64303,GeneID:100858799	LOC100858799	98.1632	35.7902	160.536	4.48549	2.16526	9.78e-13	1.78e-11	Up
CGNC:5136,GeneID:424524	ODF2L	17.0082	6.20845	27.808	4.47906	2.1632	0.00192702	0.0090604	Up
CGNC:1089,GeneID:396187	MYO1F	190.619	69.6626	311.576	4.47264	2.16113	1.11e-20	3.36e-19	Up
CGNC:51622,GeneID:422090	LOC422090	334.415	122.527	546.304	4.45865	2.15661	1.63e-29	7.6e-28	Up
CGNC:56864,GeneID:771550	EPHA2	313.574	114.931	512.218	4.45675	2.15599	1.95e-28	8.69e-27	Up
CGNC:10423,GeneID:422752	LNX1	14.2248	5.22489	23.2246	4.445	2.15218	0.00466475	0.0197022	Up
CGNC:4373,GeneID:423769	ALOX5	43.3902	16.0403	70.7402	4.41016	2.14083	9.34e-07	8.48e-06	Up
CGNC:52081,GeneID:423919	LOC423919	610.605	225.743	995.467	4.40973	2.14069	1.5e-29	7.06e-28	Up
CGNC:54437,GeneID:768406	STAT4	71.1489	26.3134	115.984	4.40781	2.14006	0.00117966	0.00586006	Up
CGNC:1891,GeneID:417549	TMEM248	2113.55	782.691	3444.41	4.40072	2.13774	1.46e-58	1.66e-56	Up
CGNC:9137,GeneID:770747	FAM83F	12.2977	4.55851	20.037	4.39551	2.13603	0.00979419	0.0372152	Up
GeneID:107051144	LOC107051144	89.884	33.3736	146.394	4.38653	2.13308	1.13e-11	1.88e-10	Up
CGNC:3205,GeneID:416268	CCDC69	14.9056	5.56386	24.2473	4.358	2.12367	0.00413607	0.0177339	Up
CGNC:5018,GeneID:770435	DUSP8	148.268	55.4415	241.094	4.34862	2.12056	1.13e-11	1.88e-10	Up
CGNC:53551,GeneID:429089	CYR61	143.333	53.6228	233.043	4.34598	2.11968	2.25e-16	5.31e-15	Up
CGNC:50544,GeneID:417545	ASL2	62.989	23.5688	102.409	4.34511	2.11939	7.47e-09	9.12e-08	Up
CGNC:11770,GeneID:421817	PNRC1	6742.52	2529.54	10955.5	4.33102	2.11471	1.68e-36	1.03e-34	Up
CGNC:55275,GeneID:769469	PDE4D	337.144	126.537	547.75	4.32878	2.11396	1.27e-28	5.67e-27	Up
CGNC:10946,GeneID:418310	STYK1	221.43	83.3191	359.541	4.31523	2.10944	1.45e-18	3.94e-17	Up
CGNC:51029,GeneID:419558	SERINC2	156.307	58.9468	253.667	4.30333	2.10545	3.16e-17	7.86e-16	Up
CGNC:6161,GeneID:395879	SPI1	279.343	105.548	453.138	4.29321	2.10206	1.92e-23	6.77e-22	Up
CGNC:50450,GeneID:417147	ADAMTSL2	116.468	44.0791	188.856	4.28449	2.09912	8.46e-05	0.000538184	Up
CGNC:2782,GeneID:415380	OTUD7A	91.5973	34.6847	148.51	4.28172	2.09819	1.24e-11	2.05e-10	Up
CGNC:52220,GeneID:424577	KLF-4	260.236	98.563	421.91	4.28061	2.09782	3.21e-24	1.18e-22	Up
CGNC:7185,GeneID:421340	DUSP10	185.901	70.4155	301.387	4.28012	2.09765	7.43e-11	1.13e-09	Up
CGNC:9479,GeneID:424313	RBM43	619.486	235.104	1003.87	4.26989	2.0942	5.91e-22	1.93e-20	Up
CGNC:50368,GeneID:416889	FICD	239.172	91.2171	387.126	4.24401	2.08543	1.21e-22	4.07e-21	Up
CGNC:6796,GeneID:416734	PAK7	28.2811	10.7975	45.7647	4.23846	2.08354	9.71e-05	0.0006101	Up
GeneID:107049034	C10H15orf39	195.406	74.614	316.197	4.23777	2.08331	4.87e-15	1.03e-13	Up
GeneID:107051360	LOC107051360	36.7519	14.0379	59.4659	4.23609	2.08273	1.05e-05	7.97e-05	Up
GeneID:107050443	LOC107050443	141.672	54.1571	229.186	4.23188	2.0813	9.6e-16	2.14e-14	Up
CGNC:49465,GeneID:395764	CASP1	619.449	236.936	1001.96	4.22884	2.08026	4.36e-38	2.8e-36	Up
CGNC:66430,GeneID:422409	TDO2	19472.9	7452.22	31493.6	4.22606	2.07931	8.92e-68	1.11e-65	Up
CGNC:5405,GeneID:416069	FAM3D	44.4242	17.0179	71.8306	4.22089	2.07755	0.00638254	0.0259214	Up
CGNC:66253,GeneID:416212	LOC416212	116.379	44.6583	188.1	4.21198	2.0745	1.23e-07	1.27e-06	Up
CGNC:53995,GeneID:430600	LOC430600	76.3282	29.357	123.299	4.19999	2.07039	1.14e-09	1.54e-08	Up
CGNC:2625,GeneID:417568	SARM1	265.915	102.447	429.384	4.19128	2.06739	7.59e-24	2.75e-22	Up
CGNC:51035,GeneID:419584	LOC419584	297.057	114.55	479.565	4.18652	2.06575	1.21e-25	4.75e-24	Up
GeneID:107049264	LOC107049264	41.8356	16.1363	67.5349	4.18529	2.06533	0.00156271	0.00751905	Up
CGNC:12427,GeneID:395722	CLU	756.814	292.107	1221.52	4.18175	2.06411	7.37e-32	3.85e-30	Up
CGNC:9773,GeneID:373927	CDH20	21.9022	8.47916	35.3253	4.16613	2.05871	0.000697355	0.00364072	Up
CGNC:49833,GeneID:396491	LGALS1	79.6994	30.9197	128.479	4.15525	2.05494	1.22e-06	1.08e-05	Up
CGNC:8761,GeneID:422641	NAAA	93.5277	36.3092	150.746	4.15173	2.05371	2.08e-11	3.37e-10	Up
CGNC:9196,GeneID:776013	PELI2	816.189	318.048	1314.33	4.13249	2.04701	2.02e-41	1.43e-39	Up
CGNC:3617,GeneID:770781	PHACTR3	27.5693	10.78	44.3585	4.11489	2.04085	0.000157177	0.000939238	Up
CGNC:801,GeneID:395925	KCNJ5	90.264	35.3118	145.216	4.1124	2.03998	1.11e-08	1.32e-07	Up
CGNC:66091,GeneID:100859365	VEPH1	47.7397	18.6809	76.7986	4.11108	2.03952	8.65e-07	7.87e-06	Up
CGNC:4936,GeneID:374256	CD81	11474.6	4491.67	18457.5	4.10928	2.03888	1.69e-58	1.9e-56	Up
CGNC:51968,GeneID:423444	BCL11B	63.3511	24.8496	101.853	4.09875	2.03518	3.63e-05	0.000249546	Up
CGNC:5187,GeneID:415504	SLCO3A1	83.2224	32.6616	133.783	4.09603	2.03423	2.71e-10	3.93e-09	Up
CGNC:66235,GeneID:415336	LOC415336	1004.53	394.854	1614.2	4.08811	2.03143	1.85e-30	8.93e-29	Up
CGNC:10302,GeneID:426962	GFPT2	552.989	217.724	888.254	4.07972	2.02847	1.47e-05	0.000108932	Up
CGNC:11899,GeneID:395663	AP000295.9	719.337	283.407	1155.27	4.07635	2.02728	6.11e-39	4e-37	Up
CGNC:7693,GeneID:422487	SH2D4A	181.554	71.8627	291.245	4.0528	2.01892	1.15e-13	2.26e-12	Up
CGNC:9013,GeneID:423518	RP11-47I22.4	14.0584	5.56978	22.547	4.04809	2.01724	0.00779274	0.0306858	Up
CGNC:50127,GeneID:415969	CECR5L	607.484	240.698	974.271	4.0477	2.0171	9.2e-27	3.83e-25	Up
CGNC:8072,GeneID:424642	ZCCHC11	1717.19	680.673	2753.7	4.04555	2.01634	1.52e-50	1.38e-48	Up
CGNC:51028,GeneID:419557	FABP3	69.55	27.5722	111.528	4.04493	2.01611	4.61e-06	3.74e-05	Up
CGNC:465,GeneID:419565	THEMIS2	151.949	60.253	243.645	4.04369	2.01567	8.72e-16	1.95e-14	Up
CGNC:63816,GeneID:100859319	CD48	113.084	44.8871	181.281	4.03861	2.01386	1.04e-12	1.87e-11	Up
CGNC:14642,GeneID:420139	F2RL3	49.2923	19.6006	78.9841	4.02969	2.01067	8.23e-07	7.5e-06	Up
CGNC:9785,GeneID:395750	ETV6	578.053	230.202	925.904	4.02214	2.00796	8.95e-35	5.22e-33	Up
CGNC:52224,GeneID:424586	PLK3	77.2047	30.7997	123.61	4.01334	2.0048	1.61e-09	2.13e-08	Up
CGNC:2946,GeneID:396405	CAMKK2	3664.89	1465.49	5864.3	4.00161	2.00058	1.05e-56	1.12e-54	Up
CGNC:8659,GeneID:423472	AMN	254.46	407.279	101.641	0.249561	-2.00254	4.81e-22	1.58e-20	Down
CGNC:4528,GeneID:427504	BNC1	18.4028	29.4589	7.34666	0.249387	-2.00354	0.00260637	0.011809	Down
CGNC:52775,GeneID:426399	TP53I11	288.889	462.491	115.286	0.249272	-2.00421	6.31e-05	0.000413598	Down
CGNC:64243,GeneID:100858866	SLC39A5	493.923	791.344	196.502	0.248314	-2.00976	2.71e-23	9.54e-22	Down
CGNC:4604,GeneID:770036	C10ORF65	337.995	541.763	134.226	0.247757	-2.013	1.31e-26	5.44e-25	Down
CGNC:55343,GeneID:769554	LOC769554	58.8536	94.3624	23.3448	0.247395	-2.01511	8.4e-08	8.91e-07	Down
GeneID:107055016	LOC107055016	87.8349	140.925	34.7449	0.246549	-2.02005	1.36e-10	2.04e-09	Down
CGNC:12525,GeneID:422057	RCAN2	135.446	217.407	53.484	0.246008	-2.02322	1.98e-12	3.51e-11	Down
CGNC:7111,GeneID:422407	GUCY1A3	390.886	628.785	152.987	0.243305	-2.03916	3.73e-12	6.47e-11	Down
CGNC:52552,GeneID:425719	TM6SF2	350.881	564.576	137.185	0.242988	-2.04104	1.2e-27	5.19e-26	Down
CGNC:5551,GeneID:415530	RASL12	48.1735	77.5245	18.8226	0.242795	-2.04219	8.33e-07	7.6e-06	Down
CGNC:4772,GeneID:396322	GSTT1	2268.85	3655.31	882.383	0.241398	-2.05052	8.21e-34	4.61e-32	Down
CGNC:66387,GeneID:420909	RNF152	97.7872	157.611	37.9631	0.240865	-2.0537	1.77e-05	0.000129602	Down
CGNC:854,GeneID:428333	CREB3L3	1391.86	2244.11	539.617	0.24046	-2.05613	1.03e-49	9.26e-48	Down
CGNC:3890,GeneID:426629	DAK	1217.22	1962.64	471.809	0.240395	-2.05652	5.28e-26	2.09e-24	Down
CGNC:11169,GeneID:422850	STK32B	194.15	313.147	75.1523	0.23999	-2.05895	5.66e-12	9.61e-11	Down
CGNC:10443,GeneID:421695	ALDH8A1	1184.72	1911.57	457.866	0.239524	-2.06176	6.76e-16	1.53e-14	Down
CGNC:66481,GeneID:424768	CLDN15	1483.61	2393.91	573.302	0.239484	-2.062	7.83e-24	2.83e-22	Down
CGNC:7704,GeneID:423333	TTC6	98.1754	158.427	37.924	0.239379	-2.06263	6.37e-12	1.08e-10	Down
CGNC:50962,GeneID:419289	OCX36	26.027	42.008	10.046	0.239146	-2.06404	0.00023386	0.00135058	Down
CGNC:12356,GeneID:395254	FKBP1B	55.7169	89.9885	21.4454	0.238312	-2.06907	0.00186772	0.00882383	Down
CGNC:2371,GeneID:416221	SFXN1	939.676	1518.04	361.317	0.238016	-2.07087	1.15e-44	9.35e-43	Down
GeneID:107054997	TRNP1	47.5831	76.9049	18.2613	0.237453	-2.07429	6.25e-07	5.79e-06	Down
CGNC:56138,GeneID:770588	HRG	4138.43	6690.27	1586.58	0.237147	-2.07615	3.96e-09	5.01e-08	Down
CGNC:3030,GeneID:396080	SPP2	29907.9	48352.5	11463.2	0.237076	-2.07658	8.29e-36	5e-34	Down
CGNC:5097,GeneID:395766	USP2	122.628	198.688	46.5666	0.23437	-2.09314	2.45e-14	4.98e-13	Down
CGNC:2531,GeneID:395237	SFRP1	621.05	1008.23	233.873	0.231964	-2.10803	4.75e-16	1.09e-14	Down
CGNC:11090,GeneID:421068	ABHD3	241.351	391.911	90.7905	0.231661	-2.10991	1.08e-05	8.15e-05	Down
CGNC:66435,GeneID:422528	LOC422528	2009.52	3263.41	755.623	0.231544	-2.11064	7.23e-57	7.74e-55	Down
CGNC:3344,GeneID:396213	TNR	14.3162	23.2585	5.37387	0.23105	-2.11372	0.00539509	0.0223238	Down
CGNC:11550,GeneID:418460	PDZK1	43.0101	69.9116	16.1086	0.230414	-2.1177	1.33e-05	9.96e-05	Down
GeneID:107049142	LOC107049142	185.226	301.437	69.0153	0.228954	-2.12687	2.92e-10	4.21e-09	Down
CGNC:2669,GeneID:422970	GAS2	1422.93	2317.49	528.378	0.227995	-2.13292	2.94e-53	2.86e-51	Down
CGNC:69305,GeneID:101749846	LOC101749846	675.92	1101.34	250.501	0.227452	-2.13637	8.22e-21	2.51e-19	Down
CGNC:4531,GeneID:395201	SH3GL3	13.8277	22.5337	5.12174	0.227292	-2.13738	0.00525054	0.0218448	Down
CGNC:7757,GeneID:427868	TRHDE	863.469	1407.35	319.591	0.227088	-2.13868	3.39e-13	6.44e-12	Down
CGNC:69870,GeneID:101750420	LOC101750420	308.319	502.641	113.997	0.226796	-2.14053	2.71e-05	0.000190796	Down
CGNC:57182,GeneID:771974	CYP4B1L	512.47	836.234	188.706	0.225662	-2.14776	1.78e-30	8.68e-29	Down
CGNC:49474,GeneID:395780	APOA4	741.533	1210.26	272.803	0.225408	-2.14939	0.000639458	0.00337008	Down
CGNC:7052,GeneID:422405	NPY2R	14.0266	22.8933	5.16001	0.225394	-2.14948	0.00458588	0.0194058	Down
CGNC:135,GeneID:396353	NREP	2263.51	3694.62	832.398	0.2253	-2.15008	0.000381365	0.00210837	Down
CGNC:1202,GeneID:419875	SLC16A1	8481.03	13850.6	3111.44	0.224642	-2.1543	9.03e-23	3.09e-21	Down
CGNC:9670,GeneID:408024	PAH	3227.26	5277.26	1177.27	0.223084	-2.16434	1.72e-25	6.68e-24	Down
CGNC:4798,GeneID:395792	TBX6	18.4154	30.1289	6.70195	0.222443	-2.16849	0.00121144	0.00599471	Down
CGNC:7655,GeneID:374011	MAB21L2	225.97	369.938	82.003	0.221667	-2.17353	1.86e-23	6.57e-22	Down
CGNC:2811,GeneID:417179	C9ORF58	646.733	1059.4	234.069	0.220945	-2.17824	3.21e-35	1.89e-33	Down
GeneID:107052770	LOC107052770	51.6113	84.5666	18.6561	0.220608	-2.18044	5.38e-05	0.000357476	Down
CGNC:50508,GeneID:417443	ABCA9	105.299	172.864	37.7347	0.218291	-2.19568	8.62e-08	9.12e-07	Down
CGNC:64405,GeneID:100858693	LOC100858693	912.919	1501.21	324.632	0.216248	-2.20924	1.94e-49	1.72e-47	Down
CGNC:14669,GeneID:769963	PAFAH2	246.881	406.011	87.7513	0.21613	-2.21003	2.38e-25	9.16e-24	Down
CGNC:49655,GeneID:396111	RYR3	31.3493	51.5763	11.1224	0.215649	-2.21324	5.56e-05	0.000367118	Down
CGNC:52114,GeneID:424025	TRPM8	205.887	338.825	72.949	0.2153	-2.21558	2.7e-09	3.49e-08	Down
CGNC:51965,GeneID:423435	SERPINA5	1967.9	3239.31	696.492	0.215012	-2.21751	4.28e-22	1.41e-20	Down
GeneID:107054804	TUSC5	99.5326	164.033	35.0325	0.213571	-2.22722	2.2e-09	2.87e-08	Down
CGNC:70630,GeneID:101751203	LOC101751203	15.2211	25.0875	5.35474	0.213443	-2.22808	0.00795833	0.0312273	Down
CGNC:50138,GeneID:416012	SLC26A6	35.8532	59.1105	12.5958	0.21309	-2.23047	0.0024522	0.0111924	Down
CGNC:69967,GeneID:101750517	LOC101750517	20.3877	33.6368	7.13852	0.212223	-2.23635	0.000409922	0.00225356	Down
GeneID:107049247	INHBE	15.6805	25.8784	5.48256	0.211859	-2.23883	0.00193413	0.00908362	Down
CGNC:7201,GeneID:428987	PPAPDC1A	102.646	169.46	35.8315	0.211445	-2.24164	2.29e-12	4.04e-11	Down
CGNC:49152,GeneID:386573	ASCL1	92.4335	152.653	32.2138	0.211026	-2.24451	5.66e-13	1.05e-11	Down
CGNC:12069,GeneID:418528	TMPRSS2	420.466	694.577	146.354	0.21071	-2.24667	1.22e-31	6.27e-30	Down
CGNC:64511,GeneID:100858582	RAB25	17.5973	29.0803	6.11425	0.210254	-2.2498	0.000989698	0.00498161	Down
CGNC:6399,GeneID:417730	CD36	2557.55	4227.74	887.367	0.209892	-2.25228	8.22e-67	1.02e-64	Down
CGNC:11604,GeneID:768864	C8ORF34	10.8777	18.0375	3.71791	0.206121	-2.27843	0.00996853	0.037766	Down
CGNC:49616,GeneID:396030	BMPR1B	74.3245	123.295	25.3542	0.205639	-2.28181	3.14e-11	4.99e-10	Down
CGNC:8327,GeneID:417877	PPFIA2	23.7936	39.4936	8.09355	0.204933	-2.28677	0.00420811	0.0180012	Down
CGNC:11824,GeneID:421839	PRSS35	395.937	658.289	133.586	0.20293	-2.30095	0.00805659	0.0315462	Down
GeneID:107055351	REEP6	51.9518	86.5663	17.3372	0.200277	-2.31993	2.97e-06	2.48e-05	Down
CGNC:8991,GeneID:423516	SYT16	115.706	192.862	38.55	0.199884	-2.32277	4.22e-12	7.27e-11	Down
CGNC:14793,GeneID:421341	C3H1ORF115	1032.58	1722.33	342.828	0.199049	-2.32881	1.65e-56	1.74e-54	Down
CGNC:50147,GeneID:416053	PRRT3	24.3046	40.5486	8.06061	0.198789	-2.33069	7.21e-05	0.000466415	Down
CGNC:4177,GeneID:423756	PITX3	132.005	220.251	43.7597	0.198681	-2.33147	1.32e-09	1.77e-08	Down
CGNC:14025,GeneID:428655	GDF7	14.246	23.7816	4.71042	0.19807	-2.33592	0.00653218	0.0264263	Down
CGNC:20,GeneID:429301	WFIKKN1	107.887	180.147	35.6283	0.197774	-2.33808	3.13e-08	3.5e-07	Down
CGNC:56429,GeneID:770996	LOC770996	29.6738	49.5537	9.7939	0.197642	-2.33904	0.00770319	0.0304063	Down
CGNC:50055,GeneID:415713	LOC415713	15.4498	25.8157	5.08387	0.196929	-2.34425	0.00144219	0.0069972	Down
CGNC:51277,GeneID:420534	ABCB1LA	319.746	534.469	105.022	0.196499	-2.34741	4.95e-10	6.97e-09	Down
CGNC:29460,GeneID:771808	PIPOX	99.8879	167.091	32.6849	0.195611	-2.35394	6.92e-15	1.45e-13	Down
CGNC:1764,GeneID:419438	SLC2A5	813.487	1361.45	265.527	0.195033	-2.35821	6.68e-30	3.19e-28	Down
CGNC:8306,GeneID:429027	B3GALT1	14.5724	24.4278	4.71693	0.193097	-2.3726	0.00863491	0.0334549	Down
CGNC:2821,GeneID:417180	LAMC3	14.8207	24.8869	4.75441	0.191041	-2.38805	0.00154422	0.00743651	Down
CGNC:1803,GeneID:395535	OLFM1	275.817	463.352	88.2809	0.190527	-2.39194	3.15e-31	1.59e-29	Down
CGNC:6714,GeneID:416728	HAO1	1732.27	2917.11	547.427	0.187661	-2.4138	2.01e-69	2.6e-67	Down
CGNC:12322,GeneID:421946	FAM84A	1194.32	2014.45	374.188	0.185752	-2.42855	2.95e-42	2.15e-40	Down
CGNC:66418,GeneID:421922	RNF144A	706.9	1193.44	220.361	0.184644	-2.43718	2.68e-32	1.43e-30	Down
CGNC:50208,GeneID:416249	HAVCR1	97.114	164.027	30.2012	0.184124	-2.44125	3.53e-15	7.59e-14	Down
CGNC:7048,GeneID:422403	LRAT	89.4773	151.236	27.7184	0.183279	-2.44789	4.92e-11	7.66e-10	Down
CGNC:5255,GeneID:416966	C12ORF43	1730.41	2927.3	533.531	0.182261	-2.45592	3.7e-23	1.3e-21	Down
CGNC:66171,GeneID:431181	KCNB2	1480.91	2505.47	456.337	0.182136	-2.45691	2.55e-42	1.88e-40	Down
CGNC:52422,GeneID:425328	PPP1R3C	196.269	332.105	60.4324	0.181968	-2.45825	8.4e-11	1.28e-09	Down
CGNC:49605,GeneID:396015	HSD3B2	45.4814	77.0275	13.9354	0.180914	-2.46662	0.00021394	0.00124415	Down
GeneID:107049078	LOC107049078	232.845	394.856	70.8335	0.179391	-2.47882	1.77e-29	8.22e-28	Down
CGNC:2916,GeneID:416256	FAXDC2	339.754	576.31	103.197	0.179066	-2.48144	9.55e-30	4.53e-28	Down
CGNC:11054,GeneID:396378	PLN	45.9211	77.8996	13.9427	0.178982	-2.48211	1.02e-08	1.22e-07	Down
CGNC:70489,GeneID:101751055	LOC101751055	978.428	1662.26	294.596	0.177226	-2.49633	6.76e-42	4.84e-40	Down
CGNC:7351,GeneID:428729	MFAP3L	82.6856	140.478	24.8932	0.177204	-2.49652	1.47e-05	0.000109293	Down
CGNC:1616,GeneID:423618	OGDHL	23.6859	40.2651	7.10676	0.176499	-2.50227	3.02e-05	0.000210492	Down
CGNC:1288,GeneID:423603	PHYHIPL	14.5725	24.7953	4.3496	0.17542	-2.51111	0.0011238	0.00560254	Down
CGNC:14529,GeneID:770004	CA9	1201.53	2044.48	358.586	0.175393	-2.51134	2.22e-24	8.21e-23	Down
CGNC:12128,GeneID:418559	EFHC2	22.688	38.6227	6.75324	0.174852	-2.5158	4.18e-05	0.000282849	Down
CGNC:49560,GeneID:395933	LOC395933	81684	139570	23797.9	0.170508	-2.55209	5.13e-43	3.88e-41	Down
CGNC:61487,GeneID:100499455	CNP1	81.1464	138.696	23.5969	0.170134	-2.55526	3.42e-14	6.9e-13	Down
CGNC:5502,GeneID:427678	GRIN2A	19.6579	33.619	5.69682	0.169452	-2.56105	0.000112621	0.00069572	Down
CGNC:50509,GeneID:417445	MAP2K6	655.133	1121.32	188.95	0.168508	-2.56911	7.92e-56	8.21e-54	Down
CGNC:66651,GeneID:770737	GAMT	5004.03	8575.36	1432.71	0.167073	-2.58145	7e-93	1.12e-90	Down
CGNC:8205,GeneID:772279	SLC24A4	64.7444	111.027	18.4621	0.166286	-2.58827	4.93e-12	8.43e-11	Down
CGNC:7997,GeneID:395865	LEF1	175.61	301.193	50.0275	0.166098	-2.58989	4.5e-26	1.8e-24	Down
CGNC:11196,GeneID:421757	SLC22A16	222.019	380.931	63.1073	0.165666	-2.59365	1.06e-30	5.23e-29	Down
CGNC:1375,GeneID:419613	RSPO1	20.0556	34.4213	5.68991	0.165302	-2.59682	0.00322455	0.014307	Down
CGNC:65239,GeneID:100857820	LOC100857820	901.2	1549.49	252.909	0.163221	-2.6151	1.6e-65	1.95e-63	Down
GeneID:107052062	LOC107052062	38.6229	66.4342	10.8117	0.162742	-2.61934	3.85e-08	4.28e-07	Down
CGNC:6059,GeneID:422341	CAPN6	67.5134	116.4	18.6266	0.160023	-2.64365	6.16e-13	1.14e-11	Down
CGNC:6527,GeneID:424956	AHSG	18642.5	32149.7	5135.2	0.159728	-2.64631	3.09e-16	7.15e-15	Down
CGNC:5174,GeneID:396127	MFI2	4325.85	7460.33	1191.37	0.159693	-2.64662	1.86e-66	2.29e-64	Down
CGNC:57795,GeneID:776271	LOC776271	21.1058	36.5212	5.69031	0.155808	-2.68216	0.000258046	0.00147901	Down
CGNC:49222,GeneID:395229	TCF7	94.0605	162.796	25.3245	0.155559	-2.68447	9.96e-09	1.19e-07	Down
CGNC:8199,GeneID:429108	ACOT11	206.171	356.885	55.456	0.155389	-2.68605	6.9e-31	3.43e-29	Down
CGNC:7897,GeneID:425575	SLC30A2	15.0432	26.046	4.04046	0.155128	-2.68847	0.00797065	0.031261	Down
GeneID:101750262	TTC16	11.3415	19.6545	3.02842	0.154083	-2.69822	0.00245126	0.0111912	Down
CGNC:57798,GeneID:776274	CASP14	25.3456	43.9449	6.74634	0.153518	-2.70352	0.000200754	0.00117154	Down
CGNC:13766,GeneID:770097	GABRG3	14.1448	24.5587	3.73093	0.151919	-2.71863	0.000593715	0.00315288	Down
CGNC:10951,GeneID:418311	HAO2	659.758	1145.51	174.004	0.1519	-2.7188	2.06e-05	0.000148271	Down
CGNC:50593,GeneID:417761	CPED1	608.876	1057.58	160.17	0.151449	-2.7231	2.12e-59	2.45e-57	Down
CGNC:8786,GeneID:421576	PACRG	37.7595	65.6999	9.81914	0.149455	-2.74222	1.59e-08	1.85e-07	Down
CGNC:50329,GeneID:416696	LOC416696	39.5336	68.8234	10.2439	0.148843	-2.74814	6.69e-09	8.24e-08	Down
CGNC:63978,GeneID:100859150	PCSK4	19.402	33.7784	5.02568	0.148784	-2.74871	0.00050196	0.0027087	Down
CGNC:64180,GeneID:100858936	PAQR9	178.664	311.399	45.9288	0.147492	-2.76129	1.53e-15	3.37e-14	Down
CGNC:12012,GeneID:420266	DPYS	7969.97	13917.1	2022.83	0.145349	-2.78241	2.83e-109	5.75e-107	Down
CGNC:66505,GeneID:426557	RGS8	143.779	251.216	36.3423	0.144665	-2.78921	0.00543848	0.0224866	Down
CGNC:1494,GeneID:415906	PFKFB4	431.496	754.885	108.107	0.14321	-2.80379	1.52e-52	1.47e-50	Down
CGNC:3583,GeneID:428837	PAK6	105.051	184.107	25.9956	0.141198	-2.82421	2.47e-20	7.35e-19	Down
CGNC:1753,GeneID:426894	AQP3	392.756	689.151	96.3613	0.139826	-2.83829	2.33e-26	9.48e-25	Down
CGNC:4030,GeneID:416539	MEIOB	22.3967	39.3492	5.44429	0.138359	-2.85352	0.0027859	0.0125306	Down
GeneID:107051810	LOC107051810	8.36246	14.7273	1.99765	0.135643	-2.88212	0.00696279	0.0279315	Down
CGNC:50969,GeneID:419316	APCDD1L	142.499	251.048	33.9501	0.135233	-2.88648	5.7e-09	7.08e-08	Down
CGNC:3584,GeneID:415958	ATP2B2	1280.34	2259.38	301.314	0.133362	-2.90659	2.39e-35	1.42e-33	Down
CGNC:12660,GeneID:418770	NALCN	131.173	232.377	29.9698	0.128971	-2.95489	1.06e-06	9.5e-06	Down
CGNC:6504,GeneID:416709	PEX6	1431.29	2537.36	325.229	0.128176	-2.9638	5.63e-16	1.28e-14	Down
CGNC:9828,GeneID:418147	SLC6A12	822.075	1459.06	185.09	0.126855	-2.97874	5.43e-78	7.69e-76	Down
CGNC:65279,GeneID:100857777	LOC100857777	8.86389	15.7362	1.99153	0.126557	-2.98214	0.00430545	0.0183658	Down
CGNC:8738,GeneID:422638	SCARB2	1662.12	2953.92	370.31	0.125362	-2.99583	1.08e-98	1.84e-96	Down
CGNC:350,GeneID:419818	PI16	24.5241	43.6808	5.36736	0.122877	-3.02471	0.0035857	0.0156779	Down
CGNC:12133,GeneID:771199	GPR34	56.8021	101.174	12.4305	0.122863	-3.02488	1.74e-13	3.38e-12	Down
CGNC:66956,GeneID:101747455	LOC101747455	170.201	303.169	37.2334	0.122814	-3.02545	2.42e-07	2.39e-06	Down
GeneID:107057172	LOC107057172	183.803	327.459	40.1466	0.1226	-3.02796	4.92e-14	9.88e-13	Down
CGNC:11955,GeneID:427979	KCNE2	12.4313	22.1563	2.70627	0.122144	-3.03334	0.00124585	0.00614676	Down
CGNC:3505,GeneID:415774	SLC7A10	37.6597	67.2132	8.10618	0.120604	-3.05165	9.53e-10	1.29e-08	Down
CGNC:61486,GeneID:100499421	CHDSD	11.022	19.6791	2.36497	0.120177	-3.05677	0.00100046	0.00503125	Down
CGNC:11655,GeneID:420180	TRPA1	112.906	201.686	24.126	0.119621	-3.06345	0.00254703	0.0115558	Down
CGNC:2088,GeneID:416208	STC2	422.181	754.609	89.7529	0.11894	-3.0717	3.67e-44	2.93e-42	Down
CGNC:49331,GeneID:395458	SLC6A2	44.1694	79.304	9.03478	0.113926	-3.13383	4.8e-07	4.55e-06	Down
CGNC:51174,GeneID:420075	RP11-330H6.5	31.0707	56.0271	6.11425	0.10913	-3.19588	7.49e-09	9.14e-08	Down
CGNC:8714,GeneID:396315	IGFBP2	365.758	660.026	71.49	0.108314	-3.20671	1.59e-05	0.000117559	Down
CGNC:2021,GeneID:419903	PACSIN1	39.9045	72.0889	7.72011	0.107091	-3.22308	4.58e-09	5.76e-08	Down
CGNC:11247,GeneID:770757	DRD3	29.0689	52.694	5.4439	0.103312	-3.27493	1.2e-08	1.42e-07	Down
CGNC:6455,GeneID:396138	GRIA3	200.933	364.5	37.3658	0.102512	-3.28613	7.6e-41	5.24e-39	Down
CGNC:3834,GeneID:768548	FAM222A	71.6793	130.201	13.1579	0.101058	-3.30674	3.41e-18	9.05e-17	Down
CGNC:1179,GeneID:414890	GABRB2	11.328	20.6071	2.04893	0.0994284	-3.3302	0.000357749	0.001989	Down
CGNC:51996,GeneID:423563	MDGA2	28.1634	51.2881	5.0387	0.0982431	-3.3475	2.82e-05	0.000197302	Down
CGNC:55902,GeneID:770271	LOC770271	7.5009	13.6676	1.3342	0.0976175	-3.35672	0.00870136	0.0336525	Down
CGNC:16366,GeneID:395504	GATM	16186.9	29519.7	2854.03	0.0966821	-3.37061	1.25e-55	1.28e-53	Down
CGNC:66172,GeneID:776071	NEK10	19.3799	35.3519	3.40798	0.0964018	-3.3748	1.97e-06	1.69e-05	Down
CGNC:5922,GeneID:395868	TLX1	49.5346	90.7052	8.36403	0.0922111	-3.43892	1.76e-06	1.53e-05	Down
CGNC:17418,GeneID:425711	C8ORF22	3397.33	6223.09	571.574	0.0918473	-3.44462	1.03e-46	8.75e-45	Down
CGNC:8016,GeneID:421466	CYP1B1	685.372	1256.07	114.675	0.0912972	-3.45329	8.8e-91	1.37e-88	Down
CGNC:8634,GeneID:424719	C8H1ORF173	186.509	341.915	31.1023	0.0909652	-3.45854	1.08e-41	7.71e-40	Down
CGNC:13704,GeneID:430112	ANKRD33	6.22493	11.4191	1.03078	0.0902681	-3.46964	0.00804676	0.0315151	Down
CGNC:8162,GeneID:423412	TC2N	54.4353	99.8623	9.00835	0.0902077	-3.47061	1.71e-07	1.74e-06	Down
CGNC:52261,GeneID:424802	NYAP2	47.3128	86.8806	7.74496	0.0891449	-3.4877	2.29e-07	2.28e-06	Down
CGNC:10586,GeneID:422770	GABRA4	23.8189	44.2489	3.38885	0.076586	-3.70677	1.99e-08	2.28e-07	Down
CGNC:66339,GeneID:419335	LOC419335	22.1947	41.7022	2.68713	0.0644362	-3.95598	1.79e-08	2.06e-07	Down
CGNC:64319,GeneID:100858782	PROCA1	29.2513	55.1073	3.39536	0.0616136	-4.02061	3.42e-06	2.83e-05	Down
CGNC:4670,GeneID:423076	KCNC1	31.7882	59.9033	3.67313	0.0613177	-4.02755	9.98e-12	1.66e-10	Down
CGNC:1253,GeneID:417505	HSD3B7	215.841	408.253	23.4278	0.0573854	-4.12317	2.03e-58	2.27e-56	Down
CGNC:8191,GeneID:421507	GREM2	12.705	24.0571	1.35294	0.0562385	-4.1523	0.00835614	0.0325739	Down
CGNC:17016,GeneID:426785	INDOL1	646.84	1226.2	67.4799	0.0550317	-4.18359	3.24e-84	4.81e-82	Down
CGNC:51199,GeneID:420171	CPA6	6.5545	12.426	0.682977	0.0549634	-4.18538	0.00223729	0.0103244	Down
CGNC:9331,GeneID:420761	AMPH	157.22	300.084	14.357	0.0478432	-4.38554	1.33e-10	1.99e-09	Down
CGNC:50311,GeneID:416655	LOC416655	57.7072	110.376	5.0387	0.0456504	-4.45323	8.59e-10	1.17e-08	Down
CGNC:12684,GeneID:418794	GPC6	39.6759	75.994	3.35788	0.0441861	-4.50026	5.77e-16	1.31e-14	Down
CGNC:51894,GeneID:423119	LOC423119	23.8261	45.648	2.00416	0.0439046	-4.50949	2.16e-06	1.85e-05	Down
GeneID:107057393	LOC107057393	20.4663	39.2892	1.64334	0.0418267	-4.57943	4.47e-09	5.63e-08	Down
CGNC:841,GeneID:415645	CETP	36.1188	69.5184	2.71929	0.039116	-4.6761	2.67e-15	5.79e-14	Down
CGNC:7964,GeneID:424618	CYP4B1	657.641	1272.05	43.2283	0.033983	-4.87904	2.24e-43	1.72e-41	Down
CGNC:14421,GeneID:770587	FMO4	183.443	354.974	11.9129	0.0335598	-4.89712	1.28e-30	6.26e-29	Down
CGNC:66514,GeneID:426992	ACSM5	625.191	1216.87	33.5132	0.0275405	-5.1823	6.64e-25	2.51e-23	Down
CGNC:11920,GeneID:771502	LRRTM1	26.5422	52.0537	1.03078	0.0198022	-5.65819	1.33e-13	2.61e-12	Down
CGNC:12904,GeneID:396137	GRIA4	65.1782	128.681	1.67549	0.0130205	-6.26307	3.38e-09	4.31e-08	Down
CGNC:68449,GeneID:101748971	PIGY	232.83	462.942	2.71889	0.00587307	-7.41167	7.23e-102	1.33e-99	Down
CGNC:52956,GeneID:426991	ACSM4	6.5224	13.0448	0	0	#NAME?	0.000121857	0.00074744	Down
CGNC:65959,GeneID:100859406	ANKK1	4.88417	9.76834	0	0	#NAME?	0.00126469	0.00621954	Down
CGNC:3146,GeneID:427660	GRIFIN	3.74128	7.48255	0	0	#NAME?	0.00651683	0.0263706	Down
CGNC:10894,GeneID:768965	2018-03-03	5.52855	11.0571	0	0	#NAME?	0.00297848	0.0133036	Down

## Sheet: (mock vs CH )(p<0.05,FC>2)
Dbxref	id	baseMean	baseMean_control_Sample_mock	baseMean_case_Sample_CH	foldChange	log2FoldChange	pval	padj	up_down
CGNC:52109,GeneID:424011	ABCA12	496.438	737.283	255.594	0.34667	-1.52837	0.000394572	0.168969	Down
CGNC:49642,GeneID:396084	ACTG2	458.094	136.222	779.966	5.7257	2.51745	0.0360615	1	Up
CGNC:8224,GeneID:420596	AGR2	6.27214	0.99795	11.5463	11.57	3.53232	0.0432011	1	Up
CGNC:66664,GeneID:771419	ANKRD22	9.66664	3.32865	16.0046	4.80815	2.26548	0.0239928	1	Up
CGNC:7334,GeneID:417802	ANO6	55.1921	34.7825	75.6017	2.17356	1.12006	0.00576601	0.748375	Up
CGNC:49508,GeneID:395841	AvBD1	4.09097	0.663154	7.51878	11.3379	3.50308	0.0465864	1	Up
CGNC:5819,GeneID:424930	B3GNT7	31.1205	18.2811	43.9599	2.40467	1.26584	0.0142716	1	Up
CGNC:1684,GeneID:427391	CDO1	418.168	561.33	275.005	0.489918	-1.02939	0.00597965	0.762161	Down
CGNC:6465,GeneID:423209	CHAC1	35.2429	22.9545	47.5314	2.07068	1.0501	0.0362888	1	Up
CGNC:52350,GeneID:425113	CHIR-IG1-5	7.75462	2.66859	12.8407	4.81177	2.26657	0.0440053	1	Up
CGNC:49398,GeneID:395606	CHRNA4	13.004	4.64935	21.3587	4.5939	2.19972	0.00839554	0.895329	Up
CGNC:5947,GeneID:416101	CNTN3	15.7802	7.64571	23.9147	3.12786	1.64518	0.0261284	1	Up
CGNC:49853,GeneID:396524	COL9A2	31.0702	15.917	46.2233	2.90402	1.53805	0.0181438	1	Up
CGNC:49239,GeneID:395276	CPA1	46.6344	0.663989	92.6049	139.467	7.12379	0.0479537	1	Up
CGNC:7555,GeneID:417843	CPM	63.1971	40.849	85.5452	2.09418	1.06639	0.00366209	0.601121	Up
CGNC:4195,GeneID:373998	CRYBA4	61.4858	38.4448	84.5267	2.19865	1.13662	0.0384894	1	Up
CGNC:49500,GeneID:395827	CYP24A1	6.99434	2.32986	11.6588	5.00409	2.32311	0.0459242	1	Up
CGNC:11764,GeneID:770067	CYYR1	60.5466	32.8816	88.2117	2.68271	1.42369	0.0381064	1	Up
CGNC:283,GeneID:427073	DDX25	19.9065	10.9965	28.8165	2.62051	1.38985	0.0318122	1	Up
CGNC:51737,GeneID:422427	DDX60	145.698	17.5949	273.8	15.5613	3.95989	0.0433278	1	Up
CGNC:4267,GeneID:424839	DGKG	20.7681	8.93053	32.6056	3.65102	1.8683	0.0399634	1	Up
CGNC:66436,GeneID:422531	DKK2	29.3155	7.61769	51.0133	6.69668	2.74345	0.00492389	0.698649	Up
CGNC:52896,GeneID:426826	DMBT1L	329.337	93.2535	565.42	6.06326	2.60009	0.0386834	1	Up
CGNC:382,GeneID:421177	ELF3	29.839	6.63738	53.0407	7.9912	2.99841	0.0312126	1	Up
CGNC:8950,GeneID:417964	EMP1	68.56	45.1067	92.0133	2.0399	1.0285	0.00457436	0.68471	Up
CGNC:53185,GeneID:427773	ENTPD2L	26.8874	16.9452	36.8295	2.17344	1.11998	0.0437873	1	Up
CGNC:49118,GeneID:378782	EPHA1	37.849	25.0096	50.6885	2.02676	1.01918	0.0259361	1	Up
CGNC:1501,GeneID:427805	EVPL	31.18	9.6248	52.7353	5.4791	2.45394	0.0376318	1	Up
CGNC:1179,GeneID:414890	GABRB2	32.9446	20.9393	44.9499	2.14667	1.1021	0.0290631	1	Up
CGNC:11038,GeneID:395278	GJA1	338.194	209.909	466.479	2.22229	1.15205	0.0239166	1	Up
CGNC:3666,GeneID:769706	GLRA4	8.37321	1.97516	14.7713	7.47852	2.90275	0.0286563	1	Up
CGNC:66294,GeneID:417748	GPR37	2.68872	0	5.37743	Inf	Inf	0.0343649	1	Up
CGNC:12904,GeneID:396137	GRIA4	87.4263	130.788	44.0649	0.336919	-1.56953	0.0264218	1	Down
CGNC:6319,GeneID:416112	GRM7	21.8356	11.6232	32.048	2.75724	1.46323	0.0182567	1	Up
CGNC:51015,GeneID:419498	GUCA2B	92.319	15.3001	169.338	11.0678	3.46829	0.0260297	1	Up
CGNC:9556,GeneID:426516	HNRPK	799.037	453.797	1144.28	2.52156	1.33432	0.0319105	1	Up
CGNC:55291,GeneID:769490	HS3ST3A1	130.701	233.483	27.9182	0.119573	-3.06404	0.0328639	1	Down
CGNC:55760,GeneID:770082	HSPA12B	14.9716	5.33182	24.6113	4.61593	2.20662	0.0191825	1	Up
CGNC:49866,GeneID:403120	IFI6	513.055	54.5894	971.52	17.7969	4.15355	0.0452658	1	Up
CGNC:52052,GeneID:423790	IFIT5	720.449	26.9343	1413.96	52.4968	5.71416	0.0190015	1	Up
CGNC:55112,GeneID:769256	IL17REL	3.12267	0	6.24534	Inf	Inf	0.0243466	1	Up
GeneID:107049247	INHBE	47.3868	26.2871	68.4865	2.60533	1.38146	0.0360036	1	Up
CGNC:10648,GeneID:396330	IRF7	320.568	156.4	484.735	3.09933	1.63195	0.0475969	1	Up
CGNC:49782,GeneID:396385	IRF8	819.243	505.799	1132.69	2.2394	1.16311	0.0390017	1	Up
CGNC:12701,GeneID:418812	IRG1	16.6698	2.31949	31.0201	13.3737	3.74132	0.030941	1	Up
CGNC:56331,GeneID:770867	JPH2	16.058	7.29017	24.8259	3.4054	1.76782	0.0340609	1	Up
CGNC:1510,GeneID:395301	KCNMB1	56.2867	28.5183	84.0551	2.94741	1.55945	0.030405	1	Up
CGNC:12707,GeneID:418818	KLF5	21.1735	11.9061	30.4409	2.55674	1.3543	0.0338986	1	Up
CGNC:49894,GeneID:408040	KRT15	37.8426	23.6577	52.0275	2.19917	1.13696	0.0278199	1	Up
CGNC:54198,GeneID:431299	KRT75L2	112.417	0	224.834	Inf	Inf	0.0398558	1	Up
CGNC:64777,GeneID:100858302	KRT75L4	105.521	0	211.042	Inf	Inf	0.0433736	1	Up
CGNC:49896,GeneID:408043	LAMC2	14.6007	6.01798	23.1834	3.85235	1.94574	0.0141966	1	Up
CGNC:4754,GeneID:396471	LECT2	8.26303	2.65512	13.8709	5.22422	2.38522	0.0250065	1	Up
GeneID:107049625	LGI3	19.8956	9.27009	30.5212	3.29243	1.71915	0.00860413	0.895524	Up
CGNC:10423,GeneID:422752	LNX1	12.2341	5.31668	19.1515	3.60216	1.84886	0.0292964	1	Up
CGNC:65465,GeneID:100857563	LOC100857563	62.8697	22.2513	103.488	4.65088	2.2175	0.0498736	1	Up
CGNC:65249,GeneID:100857809	LOC100857809	13.7548	3.657	23.8525	6.52243	2.70541	0.00155599	0.383117	Up
CGNC:63675,GeneID:100859467	LOC100859467	38.0936	21.7417	54.4454	2.50419	1.32435	0.0421576	1	Up
CGNC:63409,GeneID:100859740	LOC100859740	3.87101	0	7.74201	Inf	Inf	0.00781306	0.882967	Up
CGNC:66889,GeneID:101747386	LOC101747386	26.9054	0	53.8108	Inf	Inf	0.00877775	0.895524	Up
CGNC:67300,GeneID:101747807	LOC101747807	37.3661	18.6159	56.1162	3.01443	1.59188	0.000883809	0.290149	Up
CGNC:68051,GeneID:101748568	LOC101748568	40.5995	22.8133	58.3858	2.55929	1.35574	0.0206278	1	Up
CGNC:68702,GeneID:101749230	LOC101749230	26.2285	13.6639	38.7931	2.83909	1.50543	0.00965844	0.932333	Up
CGNC:70209,GeneID:101750767	LOC101750767	119.751	54.7241	184.778	3.37654	1.75554	0.0471613	1	Up
CGNC:71167,GeneID:101751749	LOC101751749	1628.17	2173.92	1082.42	0.497912	-1.00604	5.38303e-06	0.0150213	Down
CGNC:71609,GeneID:101752200	LOC101752200	13.3698	20.9441	5.7955	0.276713	-1.85354	0.0261839	1	Down
GeneID:107049047	LOC107049047	182.671	30.4289	334.914	11.0064	3.46028	0.0140526	1	Up
GeneID:107049144	LOC107049144	28.1703	8.33127	48.0093	5.76254	2.52671	0.00505258	0.701798	Up
GeneID:107049174	LOC107049174	151.645	77.5792	225.712	2.90944	1.54074	0.0146176	1	Up
GeneID:107049306	LOC107049306	13.2713	6.35194	20.1907	3.17866	1.66842	0.0380045	1	Up
GeneID:107049482	LOC107049482	37.8752	20.7281	55.0223	2.65447	1.40843	0.0133165	1	Up
GeneID:107049811	LOC107049811	3.15958	6.31916	0	0	#NAME?	0.0200146	1	Down
GeneID:107049846	LOC107049846	10.1993	2.00794	18.3907	9.15901	3.19519	0.0224866	1	Up
GeneID:107049909	LOC107049909	19.6903	7.32462	32.056	4.37647	2.12977	0.0304713	1	Up
GeneID:107050429	LOC107050429	31.3247	17.0521	45.5973	2.67401	1.419	0.0249785	1	Up
GeneID:107050488	LOC107050488	9.31926	1.33275	17.3058	12.9851	3.69878	0.00785773	0.882967	Up
GeneID:107051242	LOC107051242	15.7026	7.29184	24.1134	3.30691	1.72548	0.0428977	1	Up
GeneID:107052568	LOC107052568	35.6546	21.9485	49.3608	2.24894	1.16925	0.0155684	1	Up
GeneID:107053341	LOC107053341	332.037	185.869	478.204	2.5728	1.36334	0.0052714	0.717553	Up
GeneID:107054538	LOC107054538	18.3996	0.997116	35.8021	35.9057	5.16614	0.00647923	0.791837	Up
GeneID:107055428	LOC107055428	11.3179	3.34545	19.2904	5.76614	2.52761	0.00604047	0.762161	Up
GeneID:107055483	LOC107055483	18.8919	10.038	27.7458	2.76407	1.46679	0.0326851	1	Up
GeneID:107055601	LOC107055601	22.7139	11.6619	33.7659	2.89539	1.53376	0.0118463	1	Up
GeneID:107055712	LOC107055712	7.04312	2.32986	11.7564	5.04596	2.33513	0.0453163	1	Up
GeneID:107056135	LOC107056135	4.15273	7.95022	0.355231	0.0446819	-4.48417	0.0263785	1	Down
GeneID:107056785	LOC107056785	159.257	275.391	43.1227	0.156587	-2.67496	0.0134777	1	Down
GeneID:107057303	LOC107057303	21.5448	32.9189	10.1708	0.308965	-1.69449	0.00669043	0.800127	Down
GeneID:107057508	LOC107057508	14.053	22.0261	6.07996	0.276035	-1.85708	0.0202988	1	Down
CGNC:49078,GeneID:374195	LOC374195	211.812	107.998	315.626	2.92252	1.54721	0.0262186	1	Up
CGNC:66285,GeneID:417536	LOC417536	11.1807	2.67336	19.688	7.36451	2.88059	0.0229467	1	Up
CGNC:50642,GeneID:417973	LOC417973	30.801	10.3089	51.2932	4.9756	2.31487	0.00740215	0.854719	Up
CGNC:51161,GeneID:420039	LOC420039	155.179	0.334796	310.024	926.008	9.85488	0.0476219	1	Up
CGNC:51661,GeneID:422224	LOC422224	44.7454	28.6091	60.8817	2.12805	1.08953	0.0130128	1	Up
CGNC:51762,GeneID:422513	LOC422513	448.696	78.508	818.884	10.4306	3.38275	0.0454981	1	Up
CGNC:66466,GeneID:424199	LOC424199	55.0407	34.8501	75.2313	2.15871	1.11017	0.00471767	0.686852	Up
CGNC:52325,GeneID:425049	LOC425049	2.55511	0	5.11021	Inf	Inf	0.0464913	1	Up
CGNC:52527,GeneID:425662	LOC425662	67.7588	0	135.518	Inf	Inf	0.0455451	1	Up
CGNC:52967,GeneID:427025	LOC427025	276.424	163.162	389.685	2.38833	1.256	0.0349278	1	Up
CGNC:54049,GeneID:430766	LOC430766	151.87	79.9236	223.815	2.80037	1.48562	0.0445045	1	Up
CGNC:54112,GeneID:431003	LOC431003	74.4103	41.4688	107.352	2.58874	1.37225	0.0412207	1	Up
CGNC:54892,GeneID:768978	LOC768978	97.9487	0	195.897	Inf	Inf	0.0462744	1	Up
CGNC:56231,GeneID:770718	LOC770718	51.1435	32.2933	69.9938	2.16744	1.11599	0.00558177	0.732217	Up
CGNC:57788,GeneID:776262	LOC776262	23.1861	10.3662	36.0061	3.47343	1.79636	0.0028849	0.519376	Up
CGNC:9423,GeneID:424301	LRP1B	8.61194	2.97955	14.2443	4.78071	2.25722	0.0292359	1	Up
CGNC:7710,GeneID:421431	MDGA1	24.5566	13.9657	35.1475	2.5167	1.33154	0.0224787	1	Up
CGNC:5605,GeneID:771284	MKX	16.677	8.95211	24.4019	2.72583	1.4467	0.0416281	1	Up
CGNC:12466,GeneID:418657	MXRA5	547.123	352.445	741.802	2.10473	1.07363	0.0230157	1	Up
CGNC:49639,GeneID:396072	MYO1A	28.8263	15.9823	41.6703	2.60727	1.38254	0.0108184	0.966006	Up
CGNC:3435,GeneID:430027	MYO5C	13.9201	4.97461	22.8656	4.59645	2.20052	0.00664407	0.800127	Up
CGNC:66172,GeneID:776071	NEK10	25.4031	35.91	14.8963	0.414823	-1.26943	0.0213559	1	Down
CGNC:50539,GeneID:417537	NF2L	7.8128	2.65429	12.9713	4.88693	2.28893	0.0433756	1	Up
CGNC:49545,GeneID:395908	OASL	1079.96	26.6118	2133.31	80.1643	6.32489	0.0174593	1	Up
CGNC:51515,GeneID:421644	OPRM1	103.483	166.127	40.8398	0.245835	-2.02424	0.0101468	0.941879	Down
CGNC:8366,GeneID:428432	OSBPL3	37.2145	22.2449	52.1842	2.3459	1.23014	0.00939685	0.920067	Up
CGNC:49958,GeneID:415327	PATL2	43.7926	26.579	61.0062	2.29528	1.19867	0.0420028	1	Up
CGNC:55088,GeneID:769230	PCSK1	66.8467	42.5053	91.1881	2.14533	1.1012	0.0313435	1	Up
CGNC:12098,GeneID:418538	PDE9A	39.7744	19.9077	59.6411	2.99587	1.58298	0.0102639	0.94239	Up
CGNC:11490,GeneID:421131	PENK	13.206	1.9903	24.4217	12.2704	3.61711	9.18242e-05	0.0651423	Up
CGNC:51522,GeneID:421682	PERP2	26.9152	16.2773	37.5531	2.30708	1.20607	0.0305513	1	Up
CGNC:12254,GeneID:395777	PHEX	75.8366	39.4787	112.195	2.8419	1.50686	0.0110739	0.970738	Up
CGNC:12403,GeneID:418624	PIGA	138.37	86.1629	190.577	2.21183	1.14524	0.0406815	1	Up
CGNC:24415,GeneID:426943	PLIN5	46.0238	29.9539	62.0937	2.07298	1.0517	0.0260122	1	Up
CGNC:49947,GeneID:415302	PML	177.689	106.338	249.041	2.34199	1.22773	0.042154	1	Up
CGNC:4500,GeneID:770690	PODXL2	53.1651	30.872	75.4583	2.44423	1.28938	0.00834518	0.895329	Up
CGNC:49897,GeneID:408044	PPL	193.731	114.096	273.366	2.39593	1.26058	0.00330758	0.56509	Up
CGNC:7713,GeneID:771985	PTPRR	136.73	80.1148	193.344	2.41334	1.27103	0.0037494	0.609477	Up
CGNC:10878,GeneID:431569	RHOBTB3	52.472	33.9371	71.0069	2.09231	1.0651	0.010006	0.941879	Up
CGNC:6428,GeneID:428868	RHOV	6.43069	0.658386	12.203	18.5347	4.21216	0.0295256	1	Up
CGNC:5041,GeneID:415492	RLBP1	5.98145	1.65717	10.3057	6.21887	2.63665	0.0422279	1	Up
CGNC:3828,GeneID:415790	RRAD	26.9264	16.5978	37.2551	2.24458	1.16644	0.0325636	1	Up
CGNC:12277,GeneID:428650	RSAD2	389.33	5.633	773.028	137.232	7.10047	0.0301691	1	Up
CGNC:51287,GeneID:420559	SAMD9L	15.9151	0.99795	30.8323	30.8956	4.94933	0.0241207	1	Up
CGNC:63703,GeneID:100859439	SDCBP2	33.2977	21.0071	45.5882	2.17013	1.11778	0.0477096	1	Up
CGNC:51964,GeneID:423434	SERPINA1	13697.6	18373.5	9021.77	0.491022	-1.02614	0.0281065	1	Down
CGNC:49346,GeneID:395496	SLC5A1	17.2707	8.5949	25.9465	3.01883	1.59399	0.0228713	1	Up
CGNC:52255,GeneID:424772	SLC9A9	23.6568	12.6139	34.6997	2.75092	1.45991	0.0142904	1	Up
CGNC:49005,GeneID:374014	SPINW	32.0653	16.7248	47.4059	2.83447	1.50308	0.0186147	1	Up
CGNC:7284,GeneID:422425	SPOCK3	41.8609	25.5314	58.1904	2.27917	1.18851	0.0168846	1	Up
CGNC:6790,GeneID:423225	SPTBN5	84.2375	23.2358	145.239	6.25066	2.64401	0.0416335	1	Up
CGNC:64367,GeneID:100858732	STAT2	235.289	111.609	358.97	3.21633	1.68541	0.0444912	1	Up
CGNC:1014,GeneID:415303	STOML1	35.5772	19.9032	51.2512	2.57502	1.36458	0.0431626	1	Up
CGNC:6097,GeneID:423175	SYT13	30.2743	18.2911	42.2575	2.31028	1.20807	0.036469	1	Up
CGNC:10960,GeneID:418313	TBX15	4.07691	0.663154	7.49066	11.2955	3.49768	0.046892	1	Up
CGNC:184,GeneID:421161	TNNI1	27.0868	12.2169	41.9568	3.43433	1.78003	0.017513	1	Up
CGNC:4212,GeneID:424836	TSPEAR	27.2568	17.2674	37.2462	2.15703	1.10904	0.0478639	1	Up
CGNC:50327,GeneID:416694	TUBAL3	61.6126	30.1404	93.0848	3.08838	1.62685	0.00458028	0.68471	Up
CGNC:49884,GeneID:407091	UBAP2	229.702	130.404	329.001	2.52293	1.3351	0.0285791	1	Up
CGNC:50688,GeneID:418167	USP18	450.094	38.2501	861.938	22.5343	4.49405	0.0160202	1	Up
CGNC:4105,GeneID:424827	VAMP2	20.5189	11.8972	29.1406	2.44937	1.29241	0.0465927	1	Up
CGNC:3608,GeneID:419218	ZNFX1	1079.95	63.5561	2096.35	32.9843	5.04371	0.0101822	0.941879	Up
