# Supplementary material for: Transcriptomic Characterization of a Chicken Embryo Model Infected With Duck Hepatitis A Virus Type 1
Source: Front Immunol. 2018 Aug 24;9:1845. doi: 10.3389/fimmu.2018.01845 (PMC6117380; doi:10.3389/fimmu.2018.01845)
Supplement: Supplementary file 2 [file data_sheet_2.xlsx]

## Sheet: MOCK VS CH60
category	ID	term	count	genes	logFC	adj_pval	zscore
BP	GO:0006954	inflammatory response	22	BDKRB1	-3.69248	8.34218e-09	-4.69042
BP	GO:0006954	inflammatory response	22	LOC422654	#NAME?	8.34218e-09	-4.69042
BP	GO:0006954	inflammatory response	22	NFKB2	-2.49807	8.34218e-09	-4.69042
BP	GO:0006954	inflammatory response	22	TNFRSF18	-2.32658	8.34218e-09	-4.69042
BP	GO:0006954	inflammatory response	22	TNFRSF6B	-5.15294	8.34218e-09	-4.69042
BP	GO:0006954	inflammatory response	22	LCN8	-6.16581	8.34218e-09	-4.69042
BP	GO:0006954	inflammatory response	22	CCLI10	-4.23727	8.34218e-09	-4.69042
BP	GO:0006954	inflammatory response	22	KIT	-3.11937	8.34218e-09	-4.69042
BP	GO:0006954	inflammatory response	22	TNFRSF8	-2.43634	8.34218e-09	-4.69042
BP	GO:0006954	inflammatory response	22	NFKBIZ	-3.4581	8.34218e-09	-4.69042
BP	GO:0006954	inflammatory response	22	LOC417536	-6.37823	8.34218e-09	-4.69042
BP	GO:0006954	inflammatory response	22	P2RX7	-6.33028	8.34218e-09	-4.69042
BP	GO:0006954	inflammatory response	22	PXK	-2.27221	8.34218e-09	-4.69042
BP	GO:0006954	inflammatory response	22	ELF3	-7.60725	8.34218e-09	-4.69042
BP	GO:0006954	inflammatory response	22	CCL19	-7.00579	8.34218e-09	-4.69042
BP	GO:0006954	inflammatory response	22	MYD88	-2.49259	8.34218e-09	-4.69042
BP	GO:0006954	inflammatory response	22	PTGFR	-4.34224	8.34218e-09	-4.69042
BP	GO:0006954	inflammatory response	22	CCL4	-8.54195	8.34218e-09	-4.69042
BP	GO:0006954	inflammatory response	22	LIPA	-2.6001	8.34218e-09	-4.69042
BP	GO:0006954	inflammatory response	22	CX3CL1	-4.35592	8.34218e-09	-4.69042
BP	GO:0006954	inflammatory response	22	IL10	-8.53781	8.34218e-09	-4.69042
BP	GO:0006954	inflammatory response	22	IL18	-3.141	8.34218e-09	-4.69042
BP	GO:0071222	cellular response to lipopolysaccharide	12	IL6	#NAME?	2.34203e-08	-2.88675
BP	GO:0071222	cellular response to lipopolysaccharide	12	CD36	2.25228	2.34203e-08	-2.88675
BP	GO:0071222	cellular response to lipopolysaccharide	12	CD86	-3.48059	2.34203e-08	-2.88675
BP	GO:0071222	cellular response to lipopolysaccharide	12	IL12B	-5.16565	2.34203e-08	-2.88675
BP	GO:0071222	cellular response to lipopolysaccharide	12	B2M	-4.65875	2.34203e-08	-2.88675
BP	GO:0071222	cellular response to lipopolysaccharide	12	IRF8	-2.18182	2.34203e-08	-2.88675
BP	GO:0071222	cellular response to lipopolysaccharide	12	CMPK2	-7.73705	2.34203e-08	-2.88675
BP	GO:0071222	cellular response to lipopolysaccharide	12	PDE4D	-2.11396	2.34203e-08	-2.88675
BP	GO:0071222	cellular response to lipopolysaccharide	12	TNIP2	-3.66782	2.34203e-08	-2.88675
BP	GO:0071222	cellular response to lipopolysaccharide	12	TNIP3	-5.63032	2.34203e-08	-2.88675
BP	GO:0071222	cellular response to lipopolysaccharide	12	IL10	-8.53781	2.34203e-08	-2.88675
BP	GO:0071222	cellular response to lipopolysaccharide	12	IL18	-3.141	2.34203e-08	-2.88675
BP	GO:0019221	cytokine-mediated signaling pathway	17	STAT4	-2.14006	7.06277e-08	-3.15296
BP	GO:0019221	cytokine-mediated signaling pathway	17	CD44	-2.63858	7.06277e-08	-3.15296
BP	GO:0019221	cytokine-mediated signaling pathway	17	IL10RA	-2.62295	7.06277e-08	-3.15296
BP	GO:0019221	cytokine-mediated signaling pathway	17	IL12B	-5.16565	7.06277e-08	-3.15296
BP	GO:0019221	cytokine-mediated signaling pathway	17	IL17REL	#NAME?	7.06277e-08	-3.15296
BP	GO:0019221	cytokine-mediated signaling pathway	17	CISH	-2.46919	7.06277e-08	-3.15296
BP	GO:0019221	cytokine-mediated signaling pathway	17	SOCS1	-5.51812	7.06277e-08	-3.15296
BP	GO:0019221	cytokine-mediated signaling pathway	17	SOCS3	-6.8782	7.06277e-08	-3.15296
BP	GO:0019221	cytokine-mediated signaling pathway	17	IL18RAP	#NAME?	7.06277e-08	-3.15296
BP	GO:0019221	cytokine-mediated signaling pathway	17	IL22RA2	-4.91739	7.06277e-08	-3.15296
BP	GO:0019221	cytokine-mediated signaling pathway	17	IFNB	#NAME?	7.06277e-08	-3.15296
BP	GO:0019221	cytokine-mediated signaling pathway	17	LRRTM1	5.65819	7.06277e-08	-3.15296
BP	GO:0019221	cytokine-mediated signaling pathway	17	IL1R2	-6.21555	7.06277e-08	-3.15296
BP	GO:0019221	cytokine-mediated signaling pathway	17	GREM2	4.1523	7.06277e-08	-3.15296
BP	GO:0019221	cytokine-mediated signaling pathway	17	IL1RL1	-2.75099	7.06277e-08	-3.15296
BP	GO:0019221	cytokine-mediated signaling pathway	17	IL4R	-2.37867	7.06277e-08	-3.15296
BP	GO:0019221	cytokine-mediated signaling pathway	17	IL7R	-3.82773	7.06277e-08	-3.15296
BP	GO:0051607	defense response to virus	13	IL6	#NAME?	1.51679e-07	-3.60555
BP	GO:0051607	defense response to virus	13	DDX60	-9.49972	1.51679e-07	-3.60555
BP	GO:0051607	defense response to virus	13	TMEM173	-4.34968	1.51679e-07	-3.60555
BP	GO:0051607	defense response to virus	13	CD86	-3.48059	1.51679e-07	-3.60555
BP	GO:0051607	defense response to virus	13	IFIT5	-10.606	1.51679e-07	-3.60555
BP	GO:0051607	defense response to virus	13	NLRC5	-3.47047	1.51679e-07	-3.60555
BP	GO:0051607	defense response to virus	13	IL12B	-5.16565	1.51679e-07	-3.60555
BP	GO:0051607	defense response to virus	13	SAMHD1	-4.07807	1.51679e-07	-3.60555
BP	GO:0051607	defense response to virus	13	OASL	-10.5761	1.51679e-07	-3.60555
BP	GO:0051607	defense response to virus	13	IFNB	#NAME?	1.51679e-07	-3.60555
BP	GO:0051607	defense response to virus	13	IRF1	-5.55004	1.51679e-07	-3.60555
BP	GO:0051607	defense response to virus	13	RSAD2	-12.0768	1.51679e-07	-3.60555
BP	GO:0051607	defense response to virus	13	TLR3	-3.50239	1.51679e-07	-3.60555
BP	GO:0044130	negative regulation of growth of symbiont in host	5	CD36	2.25228	8.9198e-07	-1.34164
BP	GO:0044130	negative regulation of growth of symbiont in host	5	IL12B	-5.16565	8.9198e-07	-1.34164
BP	GO:0044130	negative regulation of growth of symbiont in host	5	MYD88	-2.49259	8.9198e-07	-1.34164
BP	GO:0044130	negative regulation of growth of symbiont in host	5	IRF8	-2.18182	8.9198e-07	-1.34164
BP	GO:0044130	negative regulation of growth of symbiont in host	5	IL10	-8.53781	8.9198e-07	-1.34164
BP	GO:0071346	cellular response to interferon-gamma	7	CCLI10	-4.23727	2.74928e-06	-1.88982
BP	GO:0071346	cellular response to interferon-gamma	7	LOC417536	-6.37823	2.74928e-06	-1.88982
BP	GO:0071346	cellular response to interferon-gamma	7	IL12B	-5.16565	2.74928e-06	-1.88982
BP	GO:0071346	cellular response to interferon-gamma	7	SLC26A6	2.23047	2.74928e-06	-1.88982
BP	GO:0071346	cellular response to interferon-gamma	7	CCL19	-7.00579	2.74928e-06	-1.88982
BP	GO:0071346	cellular response to interferon-gamma	7	CCL4	-8.54195	2.74928e-06	-1.88982
BP	GO:0071346	cellular response to interferon-gamma	7	CX3CL1	-4.35592	2.74928e-06	-1.88982
CC	GO:0005615	extracellular space	52	OLFM1	2.39194	5.49779e-06	-4.4376
CC	GO:0005615	extracellular space	52	IL6	#NAME?	5.49779e-06	-4.4376
CC	GO:0005615	extracellular space	52	CETP	4.6761	5.49779e-06	-4.4376
CC	GO:0005615	extracellular space	52	LOC422654	#NAME?	5.49779e-06	-4.4376
CC	GO:0005615	extracellular space	52	SHH	-2.54731	5.49779e-06	-4.4376
CC	GO:0005615	extracellular space	52	MFI2	2.64662	5.49779e-06	-4.4376
CC	GO:0005615	extracellular space	52	CD36	2.25228	5.49779e-06	-4.4376
CC	GO:0005615	extracellular space	52	CTSS	-2.70067	5.49779e-06	-4.4376
CC	GO:0005615	extracellular space	52	C1QTNF6	-2.87858	5.49779e-06	-4.4376
CC	GO:0005615	extracellular space	52	SPP1	-5.29461	5.49779e-06	-4.4376
CC	GO:0005615	extracellular space	52	AMN	2.00254	5.49779e-06	-4.4376
CC	GO:0005615	extracellular space	52	LCN8	-6.16581	5.49779e-06	-4.4376
CC	GO:0005615	extracellular space	52	CCLI10	-4.23727	5.49779e-06	-4.4376
CC	GO:0005615	extracellular space	52	PTX3	-3.97723	5.49779e-06	-4.4376
CC	GO:0005615	extracellular space	52	KIT	-3.11937	5.49779e-06	-4.4376
CC	GO:0005615	extracellular space	52	VCAM1	-4.32224	5.49779e-06	-4.4376
CC	GO:0005615	extracellular space	52	LOC417536	-6.37823	5.49779e-06	-4.4376
CC	GO:0005615	extracellular space	52	ALOX5	-2.14083	5.49779e-06	-4.4376
CC	GO:0005615	extracellular space	52	LECT2	-6.21103	5.49779e-06	-4.4376
CC	GO:0005615	extracellular space	52	PTPRR	-2.54644	5.49779e-06	-4.4376
CC	GO:0005615	extracellular space	52	FABP3	-2.01611	5.49779e-06	-4.4376
CC	GO:0005615	extracellular space	52	SERPINA3	-8.50677	5.49779e-06	-4.4376
CC	GO:0005615	extracellular space	52	SERPINA5	2.21751	5.49779e-06	-4.4376
CC	GO:0005615	extracellular space	52	SERPINB2	-3.10815	5.49779e-06	-4.4376
CC	GO:0005615	extracellular space	52	CNP	-3.23783	5.49779e-06	-4.4376
CC	GO:0005615	extracellular space	52	SERPINE2	-3.29095	5.49779e-06	-4.4376
CC	GO:0005615	extracellular space	52	MMP9	-4.4387	5.49779e-06	-4.4376
CC	GO:0005615	extracellular space	52	SERPINF1	-3.15296	5.49779e-06	-4.4376
CC	GO:0005615	extracellular space	52	ERAP1	-2.51906	5.49779e-06	-4.4376
CC	GO:0005615	extracellular space	52	PCSK1	-2.95596	5.49779e-06	-4.4376
CC	GO:0005615	extracellular space	52	PCSK4	2.74871	5.49779e-06	-4.4376
CC	GO:0005615	extracellular space	52	SELE	-5.46111	5.49779e-06	-4.4376
CC	GO:0005615	extracellular space	52	SOD3	-3.963	5.49779e-06	-4.4376
CC	GO:0005615	extracellular space	52	STC1	-2.72918	5.49779e-06	-4.4376
CC	GO:0005615	extracellular space	52	STC2	3.0717	5.49779e-06	-4.4376
CC	GO:0005615	extracellular space	52	SERPINB10	-5.18929	5.49779e-06	-4.4376
CC	GO:0005615	extracellular space	52	CNTF	-2.60902	5.49779e-06	-4.4376
CC	GO:0005615	extracellular space	52	IFNB	#NAME?	5.49779e-06	-4.4376
CC	GO:0005615	extracellular space	52	B2M	-4.65875	5.49779e-06	-4.4376
CC	GO:0005615	extracellular space	52	CPA6	4.18538	5.49779e-06	-4.4376
CC	GO:0005615	extracellular space	52	CCL19	-7.00579	5.49779e-06	-4.4376
CC	GO:0005615	extracellular space	52	GREM2	4.1523	5.49779e-06	-4.4376
CC	GO:0005615	extracellular space	52	INHBB	-2.4036	5.49779e-06	-4.4376
CC	GO:0005615	extracellular space	52	CCL4	-8.54195	5.49779e-06	-4.4376
CC	GO:0005615	extracellular space	52	LIPG	-2.52717	5.49779e-06	-4.4376
CC	GO:0005615	extracellular space	52	CHRD	-2.34972	5.49779e-06	-4.4376
CC	GO:0005615	extracellular space	52	CX3CL1	-4.35592	5.49779e-06	-4.4376
CC	GO:0005615	extracellular space	52	IL10	-8.53781	5.49779e-06	-4.4376
CC	GO:0005615	extracellular space	52	IL18	-3.141	5.49779e-06	-4.4376
CC	GO:0005615	extracellular space	52	A2ML4	-3.45158	5.49779e-06	-4.4376
CC	GO:0005615	extracellular space	52	AGR2	-4.40324	5.49779e-06	-4.4376
CC	GO:0005615	extracellular space	52	IL34	-2.53726	5.49779e-06	-4.4376
MF	GO:0048020	CCR chemokine receptor binding	5	CCLI10	-4.23727	6.17995e-06	-2.23607
MF	GO:0048020	CCR chemokine receptor binding	5	LOC417536	-6.37823	6.17995e-06	-2.23607
MF	GO:0048020	CCR chemokine receptor binding	5	CCL19	-7.00579	6.17995e-06	-2.23607
MF	GO:0048020	CCR chemokine receptor binding	5	CCL4	-8.54195	6.17995e-06	-2.23607
MF	GO:0048020	CCR chemokine receptor binding	5	CX3CL1	-4.35592	6.17995e-06	-2.23607
CC	GO:0005887	integral component of plasma membrane	52	IFITM5	-3.19573	6.5997e-06	-3.05085
CC	GO:0005887	integral component of plasma membrane	52	GPR34	3.02488	6.5997e-06	-3.05085
CC	GO:0005887	integral component of plasma membrane	52	TNFRSF18	-2.32658	6.5997e-06	-3.05085
CC	GO:0005887	integral component of plasma membrane	52	LOC415713	2.34425	6.5997e-06	-3.05085
CC	GO:0005887	integral component of plasma membrane	52	C1QTNF6	-2.87858	6.5997e-06	-3.05085
CC	GO:0005887	integral component of plasma membrane	52	TNFRSF6B	-5.15294	6.5997e-06	-3.05085
CC	GO:0005887	integral component of plasma membrane	52	AVPR1B	#NAME?	6.5997e-06	-3.05085
CC	GO:0005887	integral component of plasma membrane	52	CD81	-2.03888	6.5997e-06	-3.05085
CC	GO:0005887	integral component of plasma membrane	52	TNFRSF8	-2.43634	6.5997e-06	-3.05085
CC	GO:0005887	integral component of plasma membrane	52	EPHA2	-2.15599	6.5997e-06	-3.05085
CC	GO:0005887	integral component of plasma membrane	52	SLC6A2	3.13383	6.5997e-06	-3.05085
CC	GO:0005887	integral component of plasma membrane	52	SLCO3A1	-2.03423	6.5997e-06	-3.05085
CC	GO:0005887	integral component of plasma membrane	52	P2RY14	-2.68372	6.5997e-06	-3.05085
CC	GO:0005887	integral component of plasma membrane	52	CHRM3	-4.06083	6.5997e-06	-3.05085
CC	GO:0005887	integral component of plasma membrane	52	P2RX2	-4.30592	6.5997e-06	-3.05085
CC	GO:0005887	integral component of plasma membrane	52	P2RX7	-6.33028	6.5997e-06	-3.05085
CC	GO:0005887	integral component of plasma membrane	52	THBD	-3.63149	6.5997e-06	-3.05085
CC	GO:0005887	integral component of plasma membrane	52	IL17REL	#NAME?	6.5997e-06	-3.05085
CC	GO:0005887	integral component of plasma membrane	52	SLC24A4	2.58827	6.5997e-06	-3.05085
CC	GO:0005887	integral component of plasma membrane	52	SLC16A1	2.1543	6.5997e-06	-3.05085
CC	GO:0005887	integral component of plasma membrane	52	SLC16A3	-2.17496	6.5997e-06	-3.05085
CC	GO:0005887	integral component of plasma membrane	52	SLC16A6	-3.51212	6.5997e-06	-3.05085
CC	GO:0005887	integral component of plasma membrane	52	SLC22A16	2.59365	6.5997e-06	-3.05085
CC	GO:0005887	integral component of plasma membrane	52	BEST4	-4.51527	6.5997e-06	-3.05085
CC	GO:0005887	integral component of plasma membrane	52	LOC770026	-3.10005	6.5997e-06	-3.05085
CC	GO:0005887	integral component of plasma membrane	52	SLC39A5	2.00976	6.5997e-06	-3.05085
CC	GO:0005887	integral component of plasma membrane	52	SLC26A3	-5.86014	6.5997e-06	-3.05085
CC	GO:0005887	integral component of plasma membrane	52	SLC26A6	2.23047	6.5997e-06	-3.05085
CC	GO:0005887	integral component of plasma membrane	52	SLC13A5	-2.23107	6.5997e-06	-3.05085
CC	GO:0005887	integral component of plasma membrane	52	KCNJ5	-2.03998	6.5997e-06	-3.05085
CC	GO:0005887	integral component of plasma membrane	52	TRPA1	3.06345	6.5997e-06	-3.05085
CC	GO:0005887	integral component of plasma membrane	52	HTR2B	-2.24109	6.5997e-06	-3.05085
CC	GO:0005887	integral component of plasma membrane	52	SLC5A1	-2.2008	6.5997e-06	-3.05085
CC	GO:0005887	integral component of plasma membrane	52	SLCO2A1	-2.7008	6.5997e-06	-3.05085
CC	GO:0005887	integral component of plasma membrane	52	ATP13A5	-5.30716	6.5997e-06	-3.05085
CC	GO:0005887	integral component of plasma membrane	52	PTGFR	-4.34224	6.5997e-06	-3.05085
CC	GO:0005887	integral component of plasma membrane	52	SLC6A14	-5.76058	6.5997e-06	-3.05085
CC	GO:0005887	integral component of plasma membrane	52	KCNJ15	-2.46853	6.5997e-06	-3.05085
CC	GO:0005887	integral component of plasma membrane	52	LOC101752158	-5.2441	6.5997e-06	-3.05085
CC	GO:0005887	integral component of plasma membrane	52	SLC10A4	-3.64405	6.5997e-06	-3.05085
CC	GO:0005887	integral component of plasma membrane	52	SLC2A6	-3.18547	6.5997e-06	-3.05085
CC	GO:0005887	integral component of plasma membrane	52	PPAPDC1A	2.24164	6.5997e-06	-3.05085
CC	GO:0005887	integral component of plasma membrane	52	SLC7A7	-2.24102	6.5997e-06	-3.05085
CC	GO:0005887	integral component of plasma membrane	52	SLCO4C1	-6.99426	6.5997e-06	-3.05085
CC	GO:0005887	integral component of plasma membrane	52	TLR3	-3.50239	6.5997e-06	-3.05085
CC	GO:0005887	integral component of plasma membrane	52	SLC7A10	3.05165	6.5997e-06	-3.05085
CC	GO:0005887	integral component of plasma membrane	52	CRTAM	-2.95463	6.5997e-06	-3.05085
CC	GO:0005887	integral component of plasma membrane	52	DRD3	3.27493	6.5997e-06	-3.05085
CC	GO:0005887	integral component of plasma membrane	52	ATP2B2	2.90659	6.5997e-06	-3.05085
CC	GO:0005887	integral component of plasma membrane	52	STEAP4	-4.45283	6.5997e-06	-3.05085
CC	GO:0005887	integral component of plasma membrane	52	AQP3	2.83829	6.5997e-06	-3.05085
CC	GO:0005887	integral component of plasma membrane	52	NPY2R	2.14948	6.5997e-06	-3.05085
BP	GO:0006955	immune response	19	LOC422654	#NAME?	1.29362e-05	-3.90007
BP	GO:0006955	immune response	19	TNFRSF18	-2.32658	1.29362e-05	-3.90007
BP	GO:0006955	immune response	19	CD36	2.25228	1.29362e-05	-3.90007
BP	GO:0006955	immune response	19	CTSS	-2.70067	1.29362e-05	-3.90007
BP	GO:0006955	immune response	19	TNFRSF6B	-5.15294	1.29362e-05	-3.90007
BP	GO:0006955	immune response	19	TNFRSF8	-2.43634	1.29362e-05	-3.90007
BP	GO:0006955	immune response	19	LOC100859134	-2.80247	1.29362e-05	-3.90007
BP	GO:0006955	immune response	19	OASL	-10.5761	1.29362e-05	-3.90007
BP	GO:0006955	immune response	19	C6	-4.21155	1.29362e-05	-3.90007
BP	GO:0006955	immune response	19	TNFAIP3	-2.22653	1.29362e-05	-3.90007
BP	GO:0006955	immune response	19	YF6	-2.22903	1.29362e-05	-3.90007
BP	GO:0006955	immune response	19	BF1	-3.97719	1.29362e-05	-3.90007
BP	GO:0006955	immune response	19	LOC100859374	-3.78116	1.29362e-05	-3.90007
BP	GO:0006955	immune response	19	LOC768350	-2.5924	1.29362e-05	-3.90007
BP	GO:0006955	immune response	19	IRF8	-2.18182	1.29362e-05	-3.90007
BP	GO:0006955	immune response	19	OTUD7A	-2.09819	1.29362e-05	-3.90007
BP	GO:0006955	immune response	19	LOC771089	-3.78166	1.29362e-05	-3.90007
BP	GO:0006955	immune response	19	IL10	-8.53781	1.29362e-05	-3.90007
BP	GO:0006955	immune response	19	IL18	-3.141	1.29362e-05	-3.90007
BP	GO:0001916	positive regulation of T cell mediated cytotoxicity	4	TAP2	-3.79877	1.64602e-05	-2
BP	GO:0001916	positive regulation of T cell mediated cytotoxicity	4	P2RX7	-6.33028	1.64602e-05	-2
BP	GO:0001916	positive regulation of T cell mediated cytotoxicity	4	IL12B	-5.16565	1.64602e-05	-2
BP	GO:0001916	positive regulation of T cell mediated cytotoxicity	4	B2M	-4.65875	1.64602e-05	-2
MF	GO:0008009	chemokine activity	6	LOC422654	#NAME?	1.81664e-05	-2.44949
MF	GO:0008009	chemokine activity	6	CCLI10	-4.23727	1.81664e-05	-2.44949
MF	GO:0008009	chemokine activity	6	LOC417536	-6.37823	1.81664e-05	-2.44949
MF	GO:0008009	chemokine activity	6	CCL19	-7.00579	1.81664e-05	-2.44949
MF	GO:0008009	chemokine activity	6	CCL4	-8.54195	1.81664e-05	-2.44949
MF	GO:0008009	chemokine activity	6	CX3CL1	-4.35592	1.81664e-05	-2.44949
BP	GO:0048247	lymphocyte chemotaxis	5	CCLI10	-4.23727	2.48817e-05	-2.23607
BP	GO:0048247	lymphocyte chemotaxis	5	LOC417536	-6.37823	2.48817e-05	-2.23607
BP	GO:0048247	lymphocyte chemotaxis	5	CCL19	-7.00579	2.48817e-05	-2.23607
BP	GO:0048247	lymphocyte chemotaxis	5	CCL4	-8.54195	2.48817e-05	-2.23607
BP	GO:0048247	lymphocyte chemotaxis	5	CX3CL1	-4.35592	2.48817e-05	-2.23607
BP	GO:0070098	chemokine-mediated signaling pathway	8	LOC422654	#NAME?	3.36783e-05	-2.82843
BP	GO:0070098	chemokine-mediated signaling pathway	8	CCLI10	-4.23727	3.36783e-05	-2.82843
BP	GO:0070098	chemokine-mediated signaling pathway	8	LOC417536	-6.37823	3.36783e-05	-2.82843
BP	GO:0070098	chemokine-mediated signaling pathway	8	ACKR2	-2.81743	3.36783e-05	-2.82843
BP	GO:0070098	chemokine-mediated signaling pathway	8	ACKR4	-3.18339	3.36783e-05	-2.82843
BP	GO:0070098	chemokine-mediated signaling pathway	8	CCL19	-7.00579	3.36783e-05	-2.82843
BP	GO:0070098	chemokine-mediated signaling pathway	8	CCL4	-8.54195	3.36783e-05	-2.82843
BP	GO:0070098	chemokine-mediated signaling pathway	8	CX3CL1	-4.35592	3.36783e-05	-2.82843
BP	GO:0009612	response to mechanical stimulus	4	BDKRB1	-3.69248	4.17584e-05	-2
BP	GO:0009612	response to mechanical stimulus	4	P2RX7	-6.33028	4.17584e-05	-2
BP	GO:0009612	response to mechanical stimulus	4	JUN	-2.39833	4.17584e-05	-2
BP	GO:0009612	response to mechanical stimulus	4	INHBB	-2.4036	4.17584e-05	-2
BP	GO:0042832	defense response to protozoan	5	IL6	#NAME?	4.42104e-05	-2.23607
BP	GO:0042832	defense response to protozoan	5	IL12B	-5.16565	4.42104e-05	-2.23607
BP	GO:0042832	defense response to protozoan	5	IRF8	-2.18182	4.42104e-05	-2.23607
BP	GO:0042832	defense response to protozoan	5	IL10	-8.53781	4.42104e-05	-2.23607
BP	GO:0042832	defense response to protozoan	5	IL4R	-2.37867	4.42104e-05	-2.23607
CC	GO:0042612	MHC class I protein complex	6	LOC100859134	-2.80247	9.25495e-05	-2.44949
CC	GO:0042612	MHC class I protein complex	6	B2M	-4.65875	9.25495e-05	-2.44949
CC	GO:0042612	MHC class I protein complex	6	YF6	-2.22903	9.25495e-05	-2.44949
CC	GO:0042612	MHC class I protein complex	6	BF1	-3.97719	9.25495e-05	-2.44949
CC	GO:0042612	MHC class I protein complex	6	LOC100859374	-3.78116	9.25495e-05	-2.44949
CC	GO:0042612	MHC class I protein complex	6	LOC768350	-2.5924	9.25495e-05	-2.44949
BP	GO:0002548	monocyte chemotaxis	5	CCLI10	-4.23727	0.000183079	-2.23607
BP	GO:0002548	monocyte chemotaxis	5	LOC417536	-6.37823	0.000183079	-2.23607
BP	GO:0002548	monocyte chemotaxis	5	CCL19	-7.00579	0.000183079	-2.23607
BP	GO:0002548	monocyte chemotaxis	5	CCL4	-8.54195	0.000183079	-2.23607
BP	GO:0002548	monocyte chemotaxis	5	CX3CL1	-4.35592	0.000183079	-2.23607
BP	GO:0071347	cellular response to interleukin-1	6	IL6	#NAME?	0.000244033	-2.44949
BP	GO:0071347	cellular response to interleukin-1	6	CCLI10	-4.23727	0.000244033	-2.44949
BP	GO:0071347	cellular response to interleukin-1	6	LOC417536	-6.37823	0.000244033	-2.44949
BP	GO:0071347	cellular response to interleukin-1	6	CCL19	-7.00579	0.000244033	-2.44949
BP	GO:0071347	cellular response to interleukin-1	6	CCL4	-8.54195	0.000244033	-2.44949
BP	GO:0071347	cellular response to interleukin-1	6	CX3CL1	-4.35592	0.000244033	-2.44949
BP	GO:0032735	positive regulation of interleukin-12 production	4	CD36	2.25228	0.000299875	-1
BP	GO:0032735	positive regulation of interleukin-12 production	4	IL12B	-5.16565	0.000299875	-1
BP	GO:0032735	positive regulation of interleukin-12 production	4	IRF8	-2.18182	0.000299875	-1
BP	GO:0032735	positive regulation of interleukin-12 production	4	TLR3	-3.50239	0.000299875	-1
BP	GO:0045071	negative regulation of viral genome replication	4	ZC3HAV1	-2.29838	0.000299875	-2
BP	GO:0045071	negative regulation of viral genome replication	4	OASL	-10.5761	0.000299875	-2
BP	GO:0045071	negative regulation of viral genome replication	4	EIF2AK2	-3.57317	0.000299875	-2
BP	GO:0045071	negative regulation of viral genome replication	4	RSAD2	-12.0768	0.000299875	-2
BP	GO:0007186	G-protein coupled receptor signaling pathway	24	BDKRB1	-3.69248	0.000697341	-4.49073
BP	GO:0007186	G-protein coupled receptor signaling pathway	24	BDKRB2	#NAME?	0.000697341	-4.49073
BP	GO:0007186	G-protein coupled receptor signaling pathway	24	LOC422654	#NAME?	0.000697341	-4.49073
BP	GO:0007186	G-protein coupled receptor signaling pathway	24	TAAR1	-6.05097	0.000697341	-4.49073
BP	GO:0007186	G-protein coupled receptor signaling pathway	24	GPR17	-2.6357	0.000697341	-4.49073
BP	GO:0007186	G-protein coupled receptor signaling pathway	24	LOC428816	-3.39256	0.000697341	-4.49073
BP	GO:0007186	G-protein coupled receptor signaling pathway	24	AVPR1B	#NAME?	0.000697341	-4.49073
BP	GO:0007186	G-protein coupled receptor signaling pathway	24	SFRP1	2.10803	0.000697341	-4.49073
BP	GO:0007186	G-protein coupled receptor signaling pathway	24	GPRC5A	-3.30266	0.000697341	-4.49073
BP	GO:0007186	G-protein coupled receptor signaling pathway	24	CCLI10	-4.23727	0.000697341	-4.49073
BP	GO:0007186	G-protein coupled receptor signaling pathway	24	GPR132	-4.14517	0.000697341	-4.49073
BP	GO:0007186	G-protein coupled receptor signaling pathway	24	LOC417536	-6.37823	0.000697341	-4.49073
BP	GO:0007186	G-protein coupled receptor signaling pathway	24	SCTR	-3.25834	0.000697341	-4.49073
BP	GO:0007186	G-protein coupled receptor signaling pathway	24	GNGT2	-5.67052	0.000697341	-4.49073
BP	GO:0007186	G-protein coupled receptor signaling pathway	24	ACKR2	-2.81743	0.000697341	-4.49073
BP	GO:0007186	G-protein coupled receptor signaling pathway	24	ACKR4	-3.18339	0.000697341	-4.49073
BP	GO:0007186	G-protein coupled receptor signaling pathway	24	LOC771308	#NAME?	0.000697341	-4.49073
BP	GO:0007186	G-protein coupled receptor signaling pathway	24	CCL19	-7.00579	0.000697341	-4.49073
BP	GO:0007186	G-protein coupled receptor signaling pathway	24	C3AR1	-3.08397	0.000697341	-4.49073
BP	GO:0007186	G-protein coupled receptor signaling pathway	24	CCL4	-8.54195	0.000697341	-4.49073
BP	GO:0007186	G-protein coupled receptor signaling pathway	24	CRHR2	-2.17825	0.000697341	-4.49073
BP	GO:0007186	G-protein coupled receptor signaling pathway	24	LOC101752158	-5.2441	0.000697341	-4.49073
BP	GO:0007186	G-protein coupled receptor signaling pathway	24	CX3CL1	-4.35592	0.000697341	-4.49073
BP	GO:0007186	G-protein coupled receptor signaling pathway	24	MTNR1B	-2.8786	0.000697341	-4.49073
BP	GO:0032755	positive regulation of interleukin-6 production	5	IL6	#NAME?	0.000722184	-1.34164
BP	GO:0032755	positive regulation of interleukin-6 production	5	CD36	2.25228	0.000722184	-1.34164
BP	GO:0032755	positive regulation of interleukin-6 production	5	P2RX7	-6.33028	0.000722184	-1.34164
BP	GO:0032755	positive regulation of interleukin-6 production	5	MYD88	-2.49259	0.000722184	-1.34164
BP	GO:0032755	positive regulation of interleukin-6 production	5	TLR3	-3.50239	0.000722184	-1.34164
BP	GO:0046627	negative regulation of insulin receptor signaling pathway	5	PTPN2	-2.56548	0.000722184	-2.23607
BP	GO:0046627	negative regulation of insulin receptor signaling pathway	5	CISH	-2.46919	0.000722184	-2.23607
BP	GO:0046627	negative regulation of insulin receptor signaling pathway	5	SOCS1	-5.51812	0.000722184	-2.23607
BP	GO:0046627	negative regulation of insulin receptor signaling pathway	5	SOCS3	-6.8782	0.000722184	-2.23607
BP	GO:0046627	negative regulation of insulin receptor signaling pathway	5	PRKCQ	-3.4783	0.000722184	-2.23607
BP	GO:0002474	antigen processing and presentation of peptide antigen via MHC class I	5	LOC100859134	-2.80247	0.000722184	-2.23607
BP	GO:0002474	antigen processing and presentation of peptide antigen via MHC class I	5	YF6	-2.22903	0.000722184	-2.23607
BP	GO:0002474	antigen processing and presentation of peptide antigen via MHC class I	5	BF1	-3.97719	0.000722184	-2.23607
BP	GO:0002474	antigen processing and presentation of peptide antigen via MHC class I	5	LOC100859374	-3.78116	0.000722184	-2.23607
BP	GO:0002474	antigen processing and presentation of peptide antigen via MHC class I	5	LOC768350	-2.5924	0.000722184	-2.23607
BP	GO:0042517	positive regulation of tyrosine phosphorylation of Stat3 protein	4	IL6	#NAME?	0.000740047	-2
BP	GO:0042517	positive regulation of tyrosine phosphorylation of Stat3 protein	4	KIT	-3.11937	0.000740047	-2
BP	GO:0042517	positive regulation of tyrosine phosphorylation of Stat3 protein	4	IL12B	-5.16565	0.000740047	-2
BP	GO:0042517	positive regulation of tyrosine phosphorylation of Stat3 protein	4	CNTF	-2.60902	0.000740047	-2
MF	GO:0000982	transcription factor activity, RNA polymerase II core promoter proximal region sequence-specific binding	4	FOS	-3.35279	0.000740047	-2
MF	GO:0000982	transcription factor activity, RNA polymerase II core promoter proximal region sequence-specific binding	4	RBPJL	-4.96881	0.000740047	-2
MF	GO:0000982	transcription factor activity, RNA polymerase II core promoter proximal region sequence-specific binding	4	ATF3	-2.49525	0.000740047	-2
MF	GO:0000982	transcription factor activity, RNA polymerase II core promoter proximal region sequence-specific binding	4	FOSL2	-4.56736	0.000740047	-2
CC	GO:0005886	plasma membrane	73	SUSD3	-2.50603	0.000820469	-4.79869
CC	GO:0005886	plasma membrane	73	BDKRB2	#NAME?	0.000820469	-4.79869
CC	GO:0005886	plasma membrane	73	PLSCR1	-4.18434	0.000820469	-4.79869
CC	GO:0005886	plasma membrane	73	SHH	-2.54731	0.000820469	-4.79869
CC	GO:0005886	plasma membrane	73	STAT2	-3.77861	0.000820469	-4.79869
CC	GO:0005886	plasma membrane	73	TMEM100	-2.62421	0.000820469	-4.79869
CC	GO:0005886	plasma membrane	73	SYT16	2.32277	0.000820469	-4.79869
CC	GO:0005886	plasma membrane	73	ATP6V1G3	-9.77209	0.000820469	-4.79869
CC	GO:0005886	plasma membrane	73	PIK3CB	-3.23358	0.000820469	-4.79869
CC	GO:0005886	plasma membrane	73	SLC30A2	2.68847	0.000820469	-4.79869
CC	GO:0005886	plasma membrane	73	TMEM173	-4.34968	0.000820469	-4.79869
CC	GO:0005886	plasma membrane	73	CD44	-2.63858	0.000820469	-4.79869
CC	GO:0005886	plasma membrane	73	IL10RA	-2.62295	0.000820469	-4.79869
CC	GO:0005886	plasma membrane	73	ANO9	-3.73155	0.000820469	-4.79869
CC	GO:0005886	plasma membrane	73	LOC428816	-3.39256	0.000820469	-4.79869
CC	GO:0005886	plasma membrane	73	TC2N	3.47061	0.000820469	-4.79869
CC	GO:0005886	plasma membrane	73	AVPR1B	#NAME?	0.000820469	-4.79869
CC	GO:0005886	plasma membrane	73	CD83	-2.90691	0.000820469	-4.79869
CC	GO:0005886	plasma membrane	73	GPC6	4.50026	0.000820469	-4.79869
CC	GO:0005886	plasma membrane	73	BMPR1B	2.28181	0.000820469	-4.79869
CC	GO:0005886	plasma membrane	73	ATP10B	-5.44992	0.000820469	-4.79869
CC	GO:0005886	plasma membrane	73	VAMP2	-4.38357	0.000820469	-4.79869
CC	GO:0005886	plasma membrane	73	TMPRSS2	2.24667	0.000820469	-4.79869
CC	GO:0005886	plasma membrane	73	TMPRSS7	-3.48371	0.000820469	-4.79869
CC	GO:0005886	plasma membrane	73	CA9	2.51134	0.000820469	-4.79869
CC	GO:0005886	plasma membrane	73	PTPN2	-2.56548	0.000820469	-4.79869
CC	GO:0005886	plasma membrane	73	TCIRG1	-3.43398	0.000820469	-4.79869
CC	GO:0005886	plasma membrane	73	OSBPL3	-2.55298	0.000820469	-4.79869
CC	GO:0005886	plasma membrane	73	PTPRR	-2.54644	0.000820469	-4.79869
CC	GO:0005886	plasma membrane	73	CDH3	-2.40862	0.000820469	-4.79869
CC	GO:0005886	plasma membrane	73	LY6E	-2.59267	0.000820469	-4.79869
CC	GO:0005886	plasma membrane	73	CDH20	-2.05871	0.000820469	-4.79869
CC	GO:0005886	plasma membrane	73	MYO1G	-2.31226	0.000820469	-4.79869
CC	GO:0005886	plasma membrane	73	LY96	-4.24613	0.000820469	-4.79869
CC	GO:0005886	plasma membrane	73	PXK	-2.27221	0.000820469	-4.79869
CC	GO:0005886	plasma membrane	73	CYP24A1	-2.74946	0.000820469	-4.79869
CC	GO:0005886	plasma membrane	73	ACKR2	-2.81743	0.000820469	-4.79869
CC	GO:0005886	plasma membrane	73	ERAP1	-2.51906	0.000820469	-4.79869
CC	GO:0005886	plasma membrane	73	MFAP3L	2.49652	0.000820469	-4.79869
CC	GO:0005886	plasma membrane	73	LOC100859134	-2.80247	0.000820469	-4.79869
CC	GO:0005886	plasma membrane	73	CISH	-2.46919	0.000820469	-4.79869
CC	GO:0005886	plasma membrane	73	FNDC4	-4.35429	0.000820469	-4.79869
CC	GO:0005886	plasma membrane	73	LNPEP	-2.23931	0.000820469	-4.79869
CC	GO:0005886	plasma membrane	73	RAB17	-4.97044	0.000820469	-4.79869
CC	GO:0005886	plasma membrane	73	VSIG1	-3.13118	0.000820469	-4.79869
CC	GO:0005886	plasma membrane	73	IL22RA2	-4.91739	0.000820469	-4.79869
CC	GO:0005886	plasma membrane	73	SLC51B	-2.83885	0.000820469	-4.79869
CC	GO:0005886	plasma membrane	73	GJA1	-3.31272	0.000820469	-4.79869
CC	GO:0005886	plasma membrane	73	CLDN15	2.062	0.000820469	-4.79869
CC	GO:0005886	plasma membrane	73	RGS1	-3.06447	0.000820469	-4.79869
CC	GO:0005886	plasma membrane	73	RGS8	2.78921	0.000820469	-4.79869
CC	GO:0005886	plasma membrane	73	YF6	-2.22903	0.000820469	-4.79869
CC	GO:0005886	plasma membrane	73	GABRA4	3.70677	0.000820469	-4.79869
CC	GO:0005886	plasma membrane	73	GABRB2	3.3302	0.000820469	-4.79869
CC	GO:0005886	plasma membrane	73	BF1	-3.97719	0.000820469	-4.79869
CC	GO:0005886	plasma membrane	73	LOC100859374	-3.78116	0.000820469	-4.79869
CC	GO:0005886	plasma membrane	73	LOC768350	-2.5924	0.000820469	-4.79869
CC	GO:0005886	plasma membrane	73	MYD88	-2.49259	0.000820469	-4.79869
CC	GO:0005886	plasma membrane	73	RGS16	-5.30408	0.000820469	-4.79869
CC	GO:0005886	plasma membrane	73	NET1	-2.67786	0.000820469	-4.79869
CC	GO:0005886	plasma membrane	73	GABRG3	2.71863	0.000820469	-4.79869
CC	GO:0005886	plasma membrane	73	ADCY2	-2.7144	0.000820469	-4.79869
CC	GO:0005886	plasma membrane	73	MLKL	-7.78266	0.000820469	-4.79869
CC	GO:0005886	plasma membrane	73	TRHDE	2.13868	0.000820469	-4.79869
CC	GO:0005886	plasma membrane	73	SCNN1D	-2.9164	0.000820469	-4.79869
CC	GO:0005886	plasma membrane	73	SLC41A2	-3.10712	0.000820469	-4.79869
CC	GO:0005886	plasma membrane	73	GUCY1A3	2.03916	0.000820469	-4.79869
CC	GO:0005886	plasma membrane	73	NALCN	2.95489	0.000820469	-4.79869
CC	GO:0005886	plasma membrane	73	IL16	-3.65124	0.000820469	-4.79869
CC	GO:0005886	plasma membrane	73	PCDH10	-2.46326	0.000820469	-4.79869
CC	GO:0005886	plasma membrane	73	PCDH17	-2.5348	0.000820469	-4.79869
CC	GO:0005886	plasma membrane	73	CRTAM	-2.95463	0.000820469	-4.79869
CC	GO:0005886	plasma membrane	73	CAPN3	-2.58869	0.000820469	-4.79869
BP	GO:0019882	antigen processing and presentation	6	CTSS	-2.70067	0.000854132	-2.44949
BP	GO:0019882	antigen processing and presentation	6	LOC100859134	-2.80247	0.000854132	-2.44949
BP	GO:0019882	antigen processing and presentation	6	YF6	-2.22903	0.000854132	-2.44949
BP	GO:0019882	antigen processing and presentation	6	BF1	-3.97719	0.000854132	-2.44949
BP	GO:0019882	antigen processing and presentation	6	LOC100859374	-3.78116	0.000854132	-2.44949
BP	GO:0019882	antigen processing and presentation	6	LOC768350	-2.5924	0.000854132	-2.44949
BP	GO:0030593	neutrophil chemotaxis	6	CCLI10	-4.23727	0.000854132	-2.44949
BP	GO:0030593	neutrophil chemotaxis	6	LOC417536	-6.37823	0.000854132	-2.44949
BP	GO:0030593	neutrophil chemotaxis	6	CCL19	-7.00579	0.000854132	-2.44949
BP	GO:0030593	neutrophil chemotaxis	6	CCL4	-8.54195	0.000854132	-2.44949
BP	GO:0030593	neutrophil chemotaxis	6	CX3CL1	-4.35592	0.000854132	-2.44949
BP	GO:0030593	neutrophil chemotaxis	6	PDE4D	-2.11396	0.000854132	-2.44949
CC	GO:0031012	extracellular matrix	10	SPP1	-5.29461	0.000950029	-2.52982
CC	GO:0031012	extracellular matrix	10	SERPINE2	-3.29095	0.000950029	-2.52982
CC	GO:0031012	extracellular matrix	10	MMP1	-5.16957	0.000950029	-2.52982
CC	GO:0031012	extracellular matrix	10	MMP7	#NAME?	0.000950029	-2.52982
CC	GO:0031012	extracellular matrix	10	MMP9	-4.4387	0.000950029	-2.52982
CC	GO:0031012	extracellular matrix	10	SERPINF1	-3.15296	0.000950029	-2.52982
CC	GO:0031012	extracellular matrix	10	SOD3	-3.963	0.000950029	-2.52982
CC	GO:0031012	extracellular matrix	10	AHSG	2.64631	0.000950029	-2.52982
CC	GO:0031012	extracellular matrix	10	TGM4	-5.68984	0.000950029	-2.52982
CC	GO:0031012	extracellular matrix	10	COCH	-3.54428	0.000950029	-2.52982
BP	GO:0071356	cellular response to tumor necrosis factor	7	IL6	#NAME?	0.000955621	-2.64575
BP	GO:0071356	cellular response to tumor necrosis factor	7	GATA3	-2.7965	0.000955621	-2.64575
BP	GO:0071356	cellular response to tumor necrosis factor	7	CCLI10	-4.23727	0.000955621	-2.64575
BP	GO:0071356	cellular response to tumor necrosis factor	7	LOC417536	-6.37823	0.000955621	-2.64575
BP	GO:0071356	cellular response to tumor necrosis factor	7	CCL19	-7.00579	0.000955621	-2.64575
BP	GO:0071356	cellular response to tumor necrosis factor	7	CCL4	-8.54195	0.000955621	-2.64575
BP	GO:0071356	cellular response to tumor necrosis factor	7	CX3CL1	-4.35592	0.000955621	-2.64575
BP	GO:0030218	erythrocyte differentiation	5	SPI1	-2.10206	0.00126442	-1.34164
BP	GO:0030218	erythrocyte differentiation	5	GATA3	-2.7965	0.00126442	-1.34164
BP	GO:0030218	erythrocyte differentiation	5	KIT	-3.11937	0.00126442	-1.34164
BP	GO:0030218	erythrocyte differentiation	5	PTPN2	-2.56548	0.00126442	-1.34164
BP	GO:0030218	erythrocyte differentiation	5	SFXN1	2.07087	0.00126442	-1.34164
MF	GO:0042605	peptide antigen binding	5	LOC100859134	-2.80247	0.00126442	-2.23607
MF	GO:0042605	peptide antigen binding	5	YF6	-2.22903	0.00126442	-2.23607
MF	GO:0042605	peptide antigen binding	5	BF1	-3.97719	0.00126442	-2.23607
MF	GO:0042605	peptide antigen binding	5	LOC100859374	-3.78116	0.00126442	-2.23607
MF	GO:0042605	peptide antigen binding	5	LOC768350	-2.5924	0.00126442	-2.23607
BP	GO:0034198	cellular response to amino acid starvation	4	CDKN1A	-3.51063	0.00209982	-1
BP	GO:0034198	cellular response to amino acid starvation	4	EIF2AK2	-3.57317	0.00209982	-1
BP	GO:0034198	cellular response to amino acid starvation	4	ATF3	-2.49525	0.00209982	-1
BP	GO:0034198	cellular response to amino acid starvation	4	RNF152	2.0537	0.00209982	-1
BP	GO:0050729	positive regulation of inflammatory response	4	CCLI10	-4.23727	0.00209982	-2
BP	GO:0050729	positive regulation of inflammatory response	4	LOC417536	-6.37823	0.00209982	-2
BP	GO:0050729	positive regulation of inflammatory response	4	CCL4	-8.54195	0.00209982	-2
BP	GO:0050729	positive regulation of inflammatory response	4	TLR3	-3.50239	0.00209982	-2
BP	GO:0032496	response to lipopolysaccharide	9	BDKRB1	-3.69248	0.00244487	-3
BP	GO:0032496	response to lipopolysaccharide	9	LOC422654	#NAME?	0.00244487	-3
BP	GO:0032496	response to lipopolysaccharide	9	TNFRSF18	-2.32658	0.00244487	-3
BP	GO:0032496	response to lipopolysaccharide	9	TNFRSF6B	-5.15294	0.00244487	-3
BP	GO:0032496	response to lipopolysaccharide	9	LCN8	-6.16581	0.00244487	-3
BP	GO:0032496	response to lipopolysaccharide	9	DUSP10	-2.09765	0.00244487	-3
BP	GO:0032496	response to lipopolysaccharide	9	TNFRSF8	-2.43634	0.00244487	-3
BP	GO:0032496	response to lipopolysaccharide	9	P2RX7	-6.33028	0.00244487	-3
BP	GO:0032496	response to lipopolysaccharide	9	PTGFR	-4.34224	0.00244487	-3
MF	GO:0005125	cytokine activity	10	IL6	#NAME?	0.00284885	-3.16228
MF	GO:0005125	cytokine activity	10	SPP1	-5.29461	0.00284885	-3.16228
MF	GO:0005125	cytokine activity	10	IL12B	-5.16565	0.00284885	-3.16228
MF	GO:0005125	cytokine activity	10	CNTF	-2.60902	0.00284885	-3.16228
MF	GO:0005125	cytokine activity	10	IFNB	#NAME?	0.00284885	-3.16228
MF	GO:0005125	cytokine activity	10	INHBB	-2.4036	0.00284885	-3.16228
MF	GO:0005125	cytokine activity	10	IL10	-8.53781	0.00284885	-3.16228
MF	GO:0005125	cytokine activity	10	IL16	-3.65124	0.00284885	-3.16228
MF	GO:0005125	cytokine activity	10	IL18	-3.141	0.00284885	-3.16228
MF	GO:0005125	cytokine activity	10	IL34	-2.53726	0.00284885	-3.16228
MF	GO:0003950	NAD+ ADP-ribosyltransferase activity	4	PARP12	-4.0322	0.00285374	-2
MF	GO:0003950	NAD+ ADP-ribosyltransferase activity	4	PARP14	-4.27655	0.00285374	-2
MF	GO:0003950	NAD+ ADP-ribosyltransferase activity	4	ZC3HAV1	-2.29838	0.00285374	-2
MF	GO:0003950	NAD+ ADP-ribosyltransferase activity	4	PARP9	-4.33513	0.00285374	-2
BP	GO:0034220	ion transmembrane transport	8	GRIA3	3.28613	0.00310636	2.82843
BP	GO:0034220	ion transmembrane transport	8	GRIA4	6.26307	0.00310636	2.82843
BP	GO:0034220	ion transmembrane transport	8	GABRA4	3.70677	0.00310636	2.82843
BP	GO:0034220	ion transmembrane transport	8	GABRB2	3.3302	0.00310636	2.82843
BP	GO:0034220	ion transmembrane transport	8	GABRG3	2.71863	0.00310636	2.82843
BP	GO:0034220	ion transmembrane transport	8	SFXN1	2.07087	0.00310636	2.82843
BP	GO:0034220	ion transmembrane transport	8	NALCN	2.95489	0.00310636	2.82843
BP	GO:0034220	ion transmembrane transport	8	AQP3	2.83829	0.00310636	2.82843
BP	GO:0032760	positive regulation of tumor necrosis factor production	5	CD36	2.25228	0.00311624	-1.34164
BP	GO:0032760	positive regulation of tumor necrosis factor production	5	IL12B	-5.16565	0.00311624	-1.34164
BP	GO:0032760	positive regulation of tumor necrosis factor production	5	LY96	-4.24613	0.00311624	-1.34164
BP	GO:0032760	positive regulation of tumor necrosis factor production	5	MYD88	-2.49259	0.00311624	-1.34164
BP	GO:0032760	positive regulation of tumor necrosis factor production	5	TLR3	-3.50239	0.00311624	-1.34164
BP	GO:0030217	T cell differentiation	4	KIT	-3.11937	0.00373159	-2
BP	GO:0030217	T cell differentiation	4	PTPN2	-2.56548	0.00373159	-2
BP	GO:0030217	T cell differentiation	4	EGR1	-2.61645	0.00373159	-2
BP	GO:0030217	T cell differentiation	4	IL7R	-3.82773	0.00373159	-2
BP	GO:0009615	response to virus	5	GATA3	-2.7965	0.00379195	-2.23607
BP	GO:0009615	response to virus	5	ZC3HAV1	-2.29838	0.00379195	-2.23607
BP	GO:0009615	response to virus	5	EIF2AK2	-3.57317	0.00379195	-2.23607
BP	GO:0009615	response to virus	5	DHX58	-4.13259	0.00379195	-2.23607
BP	GO:0009615	response to virus	5	MYD88	-2.49259	0.00379195	-2.23607
BP	GO:0045087	innate immune response	12	NFKB2	-2.49807	0.0041158	-3.4641
BP	GO:0045087	innate immune response	12	TMEM173	-4.34968	0.0041158	-3.4641
BP	GO:0045087	innate immune response	12	IFIH1	-4.94328	0.0041158	-3.4641
BP	GO:0045087	innate immune response	12	PTX3	-3.97723	0.0041158	-3.4641
BP	GO:0045087	innate immune response	12	NLRC5	-3.47047	0.0041158	-3.4641
BP	GO:0045087	innate immune response	12	TRIM25	-2.23889	0.0041158	-3.4641
BP	GO:0045087	innate immune response	12	SAMHD1	-4.07807	0.0041158	-3.4641
BP	GO:0045087	innate immune response	12	RIPK2	-2.78972	0.0041158	-3.4641
BP	GO:0045087	innate immune response	12	B2M	-4.65875	0.0041158	-3.4641
BP	GO:0045087	innate immune response	12	EIF2AK2	-3.57317	0.0041158	-3.4641
BP	GO:0045087	innate immune response	12	STYK1	-2.10944	0.0041158	-3.4641
BP	GO:0045087	innate immune response	12	TLR3	-3.50239	0.0041158	-3.4641
CC	GO:0031526	brush border membrane	4	CD36	2.25228	0.0046091	0
CC	GO:0031526	brush border membrane	4	CA4	-3.25053	0.0046091	0
CC	GO:0031526	brush border membrane	4	SLC26A6	2.23047	0.0046091	0
CC	GO:0031526	brush border membrane	4	TRPM6	-4.36657	0.0046091	0
BP	GO:0050727	regulation of inflammatory response	5	AHSG	2.64631	0.0054325	-1.34164
BP	GO:0050727	regulation of inflammatory response	5	TNFAIP3	-2.22653	0.0054325	-1.34164
BP	GO:0050727	regulation of inflammatory response	5	MYD88	-2.49259	0.0054325	-1.34164
BP	GO:0050727	regulation of inflammatory response	5	OTUD7A	-2.09819	0.0054325	-1.34164
BP	GO:0050727	regulation of inflammatory response	5	CASP1	-2.08026	0.0054325	-1.34164
CC	GO:0016021	integral component of membrane	142	SLC25A30	-2.6356	0.00545826	-6.37778
CC	GO:0016021	integral component of membrane	142	DISP1	-2.2543	0.00545826	-6.37778
CC	GO:0016021	integral component of membrane	142	SUSD3	-2.50603	0.00545826	-6.37778
CC	GO:0016021	integral component of membrane	142	BDKRB1	-3.69248	0.00545826	-6.37778
CC	GO:0016021	integral component of membrane	142	BDKRB2	#NAME?	0.00545826	-6.37778
CC	GO:0016021	integral component of membrane	142	TAPBP	-2.47178	0.00545826	-6.37778
CC	GO:0016021	integral component of membrane	142	LOC418668	-3.29859	0.00545826	-6.37778
CC	GO:0016021	integral component of membrane	142	LOC417345	-3.30457	0.00545826	-6.37778
CC	GO:0016021	integral component of membrane	142	TAAR1	-6.05097	0.00545826	-6.37778
CC	GO:0016021	integral component of membrane	142	MPEG1	-2.44204	0.00545826	-6.37778
CC	GO:0016021	integral component of membrane	142	GPR17	-2.6357	0.00545826	-6.37778
CC	GO:0016021	integral component of membrane	142	TMEM100	-2.62421	0.00545826	-6.37778
CC	GO:0016021	integral component of membrane	142	CYP4B1	4.87904	0.00545826	-6.37778
CC	GO:0016021	integral component of membrane	142	LOC100859740	#NAME?	0.00545826	-6.37778
CC	GO:0016021	integral component of membrane	142	SLC30A2	2.68847	0.00545826	-6.37778
CC	GO:0016021	integral component of membrane	142	LOC419112	-3.07542	0.00545826	-6.37778
CC	GO:0016021	integral component of membrane	142	PRRG4	-4.20125	0.00545826	-6.37778
CC	GO:0016021	integral component of membrane	142	TMEM173	-4.34968	0.00545826	-6.37778
CC	GO:0016021	integral component of membrane	142	CD36	2.25228	0.00545826	-6.37778
CC	GO:0016021	integral component of membrane	142	RNF144A	2.43718	0.00545826	-6.37778
CC	GO:0016021	integral component of membrane	142	CD44	-2.63858	0.00545826	-6.37778
CC	GO:0016021	integral component of membrane	142	IL10RA	-2.62295	0.00545826	-6.37778
CC	GO:0016021	integral component of membrane	142	ANO9	-3.73155	0.00545826	-6.37778
CC	GO:0016021	integral component of membrane	142	AMN	2.00254	0.00545826	-6.37778
CC	GO:0016021	integral component of membrane	142	LOC428816	-3.39256	0.00545826	-6.37778
CC	GO:0016021	integral component of membrane	142	LRAT	2.44789	0.00545826	-6.37778
CC	GO:0016021	integral component of membrane	142	CD83	-2.90691	0.00545826	-6.37778
CC	GO:0016021	integral component of membrane	142	CD86	-3.48059	0.00545826	-6.37778
CC	GO:0016021	integral component of membrane	142	REEP6	2.31993	0.00545826	-6.37778
CC	GO:0016021	integral component of membrane	142	SFRP1	2.10803	0.00545826	-6.37778
CC	GO:0016021	integral component of membrane	142	TP53I11	2.00421	0.00545826	-6.37778
CC	GO:0016021	integral component of membrane	142	GPRC5A	-3.30266	0.00545826	-6.37778
CC	GO:0016021	integral component of membrane	142	LOC770612	-5.19269	0.00545826	-6.37778
CC	GO:0016021	integral component of membrane	142	KIT	-3.11937	0.00545826	-6.37778
CC	GO:0016021	integral component of membrane	142	TAP2	-3.79877	0.00545826	-6.37778
CC	GO:0016021	integral component of membrane	142	ATP10B	-5.44992	0.00545826	-6.37778
CC	GO:0016021	integral component of membrane	142	VCAM1	-4.32224	0.00545826	-6.37778
CC	GO:0016021	integral component of membrane	142	TARP	-2.48668	0.00545826	-6.37778
CC	GO:0016021	integral component of membrane	142	SLC1A6	-5.23642	0.00545826	-6.37778
CC	GO:0016021	integral component of membrane	142	VAMP2	-4.38357	0.00545826	-6.37778
CC	GO:0016021	integral component of membrane	142	GPR132	-4.14517	0.00545826	-6.37778
CC	GO:0016021	integral component of membrane	142	LOC416212	-2.0745	0.00545826	-6.37778
CC	GO:0016021	integral component of membrane	142	TMPRSS2	2.24667	0.00545826	-6.37778
CC	GO:0016021	integral component of membrane	142	TMPRSS7	-3.48371	0.00545826	-6.37778
CC	GO:0016021	integral component of membrane	142	PLN	2.48211	0.00545826	-6.37778
CC	GO:0016021	integral component of membrane	142	CA9	2.51134	0.00545826	-6.37778
CC	GO:0016021	integral component of membrane	142	CMTM6	-3.39887	0.00545826	-6.37778
CC	GO:0016021	integral component of membrane	142	CYP1B1	3.45329	0.00545826	-6.37778
CC	GO:0016021	integral component of membrane	142	PTPN2	-2.56548	0.00545826	-6.37778
CC	GO:0016021	integral component of membrane	142	TCIRG1	-3.43398	0.00545826	-6.37778
CC	GO:0016021	integral component of membrane	142	ABHD3	2.10991	0.00545826	-6.37778
CC	GO:0016021	integral component of membrane	142	SCTR	-3.25834	0.00545826	-6.37778
CC	GO:0016021	integral component of membrane	142	PTPRC	-2.64207	0.00545826	-6.37778
CC	GO:0016021	integral component of membrane	142	PTPRR	-2.54644	0.00545826	-6.37778
CC	GO:0016021	integral component of membrane	142	CDH3	-2.40862	0.00545826	-6.37778
CC	GO:0016021	integral component of membrane	142	CDH20	-2.05871	0.00545826	-6.37778
CC	GO:0016021	integral component of membrane	142	LOC100857809	-3.26854	0.00545826	-6.37778
CC	GO:0016021	integral component of membrane	142	PIGA	-3.216	0.00545826	-6.37778
CC	GO:0016021	integral component of membrane	142	DLL1	-2.19239	0.00545826	-6.37778
CC	GO:0016021	integral component of membrane	142	ACKR2	-2.81743	0.00545826	-6.37778
CC	GO:0016021	integral component of membrane	142	ACKR4	-3.18339	0.00545826	-6.37778
CC	GO:0016021	integral component of membrane	142	LOC423849	-2.80007	0.00545826	-6.37778
CC	GO:0016021	integral component of membrane	142	RCAN2	2.02322	0.00545826	-6.37778
CC	GO:0016021	integral component of membrane	142	SCARB2	2.99583	0.00545826	-6.37778
CC	GO:0016021	integral component of membrane	142	MFAP3L	2.49652	0.00545826	-6.37778
CC	GO:0016021	integral component of membrane	142	DRAM1	-4.93325	0.00545826	-6.37778
CC	GO:0016021	integral component of membrane	142	SELE	-5.46111	0.00545826	-6.37778
CC	GO:0016021	integral component of membrane	142	TM6SF2	2.04104	0.00545826	-6.37778
CC	GO:0016021	integral component of membrane	142	FNDC4	-4.35429	0.00545826	-6.37778
CC	GO:0016021	integral component of membrane	142	LNPEP	-2.23931	0.00545826	-6.37778
CC	GO:0016021	integral component of membrane	142	CYP3A7	-3.73565	0.00545826	-6.37778
CC	GO:0016021	integral component of membrane	142	SORCS1	-2.63985	0.00545826	-6.37778
CC	GO:0016021	integral component of membrane	142	RYR3	2.21324	0.00545826	-6.37778
CC	GO:0016021	integral component of membrane	142	VSIG1	-3.13118	0.00545826	-6.37778
CC	GO:0016021	integral component of membrane	142	IL18RAP	#NAME?	0.00545826	-6.37778
CC	GO:0016021	integral component of membrane	142	IL22RA2	-4.91739	0.00545826	-6.37778
CC	GO:0016021	integral component of membrane	142	SLC51B	-2.83885	0.00545826	-6.37778
CC	GO:0016021	integral component of membrane	142	GJA1	-3.31272	0.00545826	-6.37778
CC	GO:0016021	integral component of membrane	142	GJA3	-3.62828	0.00545826	-6.37778
CC	GO:0016021	integral component of membrane	142	LOC771308	#NAME?	0.00545826	-6.37778
CC	GO:0016021	integral component of membrane	142	LRRTM1	5.65819	0.00545826	-6.37778
CC	GO:0016021	integral component of membrane	142	CLDN15	2.062	0.00545826	-6.37778
CC	GO:0016021	integral component of membrane	142	IFI27L2	-4.59306	0.00545826	-6.37778
CC	GO:0016021	integral component of membrane	142	KCNA3	-4.73581	0.00545826	-6.37778
CC	GO:0016021	integral component of membrane	142	STYK1	-2.10944	0.00545826	-6.37778
CC	GO:0016021	integral component of membrane	142	KCNB2	2.45691	0.00545826	-6.37778
CC	GO:0016021	integral component of membrane	142	DIO2	-7.0149	0.00545826	-6.37778
CC	GO:0016021	integral component of membrane	142	KCNC1	4.02755	0.00545826	-6.37778
CC	GO:0016021	integral component of membrane	142	IL1R2	-6.21555	0.00545826	-6.37778
CC	GO:0016021	integral component of membrane	142	LOC426106	-2.3724	0.00545826	-6.37778
CC	GO:0016021	integral component of membrane	142	MARCO	-2.24639	0.00545826	-6.37778
CC	GO:0016021	integral component of membrane	142	2018-03-03	Inf	0.00545826	-6.37778
CC	GO:0016021	integral component of membrane	142	BTN1A1	-2.22968	0.00545826	-6.37778
CC	GO:0016021	integral component of membrane	142	YF6	-2.22903	0.00545826	-6.37778
CC	GO:0016021	integral component of membrane	142	GABRA4	3.70677	0.00545826	-6.37778
CC	GO:0016021	integral component of membrane	142	GABRB2	3.3302	0.00545826	-6.37778
CC	GO:0016021	integral component of membrane	142	BF1	-3.97719	0.00545826	-6.37778
CC	GO:0016021	integral component of membrane	142	LOC100859374	-3.78116	0.00545826	-6.37778
CC	GO:0016021	integral component of membrane	142	LOC768350	-2.5924	0.00545826	-6.37778
CC	GO:0016021	integral component of membrane	142	LOC101750812	-4.5501	0.00545826	-6.37778
CC	GO:0016021	integral component of membrane	142	TMEM248	-2.13774	0.00545826	-6.37778
CC	GO:0016021	integral component of membrane	142	LOC424523	#NAME?	0.00545826	-6.37778
CC	GO:0016021	integral component of membrane	142	C3AR1	-3.08397	0.00545826	-6.37778
CC	GO:0016021	integral component of membrane	142	GABRG3	2.71863	0.00545826	-6.37778
CC	GO:0016021	integral component of membrane	142	ADCY2	-2.7144	0.00545826	-6.37778
CC	GO:0016021	integral component of membrane	142	TRPM5	-4.69066	0.00545826	-6.37778
CC	GO:0016021	integral component of membrane	142	TRPM6	-4.36657	0.00545826	-6.37778
CC	GO:0016021	integral component of membrane	142	TRPM8	2.21558	0.00545826	-6.37778
CC	GO:0016021	integral component of membrane	142	SDC4	-3.66733	0.00545826	-6.37778
CC	GO:0016021	integral component of membrane	142	IL1RL1	-2.75099	0.00545826	-6.37778
CC	GO:0016021	integral component of membrane	142	B3GALT1	2.3726	0.00545826	-6.37778
CC	GO:0016021	integral component of membrane	142	ANKRD22	-3.86308	0.00545826	-6.37778
CC	GO:0016021	integral component of membrane	142	GIMAP1	-2.69415	0.00545826	-6.37778
CC	GO:0016021	integral component of membrane	142	STOML1	-5.40225	0.00545826	-6.37778
CC	GO:0016021	integral component of membrane	142	CRHR2	-2.17825	0.00545826	-6.37778
CC	GO:0016021	integral component of membrane	142	TLR15	-3.80695	0.00545826	-6.37778
CC	GO:0016021	integral component of membrane	142	SIGLEC1	-2.28452	0.00545826	-6.37778
CC	GO:0016021	integral component of membrane	142	SFXN1	2.07087	0.00545826	-6.37778
CC	GO:0016021	integral component of membrane	142	LIPG	-2.52717	0.00545826	-6.37778
CC	GO:0016021	integral component of membrane	142	APOLD1	-2.17697	0.00545826	-6.37778
CC	GO:0016021	integral component of membrane	142	SLC2A5	2.35821	0.00545826	-6.37778
CC	GO:0016021	integral component of membrane	142	TAPBPL	-2.49891	0.00545826	-6.37778
CC	GO:0016021	integral component of membrane	142	CX3CL1	-4.35592	0.00545826	-6.37778
CC	GO:0016021	integral component of membrane	142	SCNN1D	-2.9164	0.00545826	-6.37778
CC	GO:0016021	integral component of membrane	142	SLC41A2	-3.10712	0.00545826	-6.37778
CC	GO:0016021	integral component of membrane	142	LOC101750517	2.23635	0.00545826	-6.37778
CC	GO:0016021	integral component of membrane	142	AGPAT1	#NAME?	0.00545826	-6.37778
CC	GO:0016021	integral component of membrane	142	LOC422993	-5.31491	0.00545826	-6.37778
CC	GO:0016021	integral component of membrane	142	NALCN	2.95489	0.00545826	-6.37778
CC	GO:0016021	integral component of membrane	142	SLC46A2	-5.28026	0.00545826	-6.37778
CC	GO:0016021	integral component of membrane	142	XKR9	-2.60768	0.00545826	-6.37778
CC	GO:0016021	integral component of membrane	142	PCDH10	-2.46326	0.00545826	-6.37778
CC	GO:0016021	integral component of membrane	142	PCDH17	-2.5348	0.00545826	-6.37778
CC	GO:0016021	integral component of membrane	142	TSPO2	-3.27258	0.00545826	-6.37778
CC	GO:0016021	integral component of membrane	142	SERINC2	-2.10545	0.00545826	-6.37778
CC	GO:0016021	integral component of membrane	142	RNF19B	-4.842	0.00545826	-6.37778
CC	GO:0016021	integral component of membrane	142	IL4R	-2.37867	0.00545826	-6.37778
CC	GO:0016021	integral component of membrane	142	MTNR1B	-2.8786	0.00545826	-6.37778
CC	GO:0016021	integral component of membrane	142	LOC100858751	-2.90125	0.00545826	-6.37778
CC	GO:0016021	integral component of membrane	142	IL7R	-3.82773	0.00545826	-6.37778
CC	GO:0016021	integral component of membrane	142	B3GNT4	-5.06634	0.00545826	-6.37778
CC	GO:0016021	integral component of membrane	142	B3GNT7	-7.55137	0.00545826	-6.37778
MF	GO:0005044	scavenger receptor activity	7	TMPRSS2	2.24667	0.00549309	-1.88982
MF	GO:0005044	scavenger receptor activity	7	ACKR2	-2.81743	0.00549309	-1.88982
MF	GO:0005044	scavenger receptor activity	7	ACKR4	-3.18339	0.00549309	-1.88982
MF	GO:0005044	scavenger receptor activity	7	DMBT1L	-6.5332	0.00549309	-1.88982
MF	GO:0005044	scavenger receptor activity	7	MARCO	-2.24639	0.00549309	-1.88982
MF	GO:0005044	scavenger receptor activity	7	LOC771089	-3.78166	0.00549309	-1.88982
MF	GO:0005044	scavenger receptor activity	7	PIT54	-3.86629	0.00549309	-1.88982
BP	GO:0008217	regulation of blood pressure	5	DLL1	-2.19239	0.00601331	-0.447214
BP	GO:0008217	regulation of blood pressure	5	ERAP1	-2.51906	0.00601331	-0.447214
BP	GO:0008217	regulation of blood pressure	5	LNPEP	-2.23931	0.00601331	-0.447214
BP	GO:0008217	regulation of blood pressure	5	TRHDE	2.13868	0.00601331	-0.447214
BP	GO:0008217	regulation of blood pressure	5	GUCY1A3	2.03916	0.00601331	-0.447214
MF	GO:0001077	transcriptional activator activity, RNA polymerase II core promoter proximal region sequence-specific binding	12	BCL11B	-2.03518	0.00601331	-2.3094
MF	GO:0001077	transcriptional activator activity, RNA polymerase II core promoter proximal region sequence-specific binding	12	PITX3	2.33147	0.00601331	-2.3094
MF	GO:0001077	transcriptional activator activity, RNA polymerase II core promoter proximal region sequence-specific binding	12	SPI1	-2.10206	0.00601331	-2.3094
MF	GO:0001077	transcriptional activator activity, RNA polymerase II core promoter proximal region sequence-specific binding	12	GATA3	-2.7965	0.00601331	-2.3094
MF	GO:0001077	transcriptional activator activity, RNA polymerase II core promoter proximal region sequence-specific binding	12	ETV6	-2.00796	0.00601331	-2.3094
MF	GO:0001077	transcriptional activator activity, RNA polymerase II core promoter proximal region sequence-specific binding	12	ELF3	-7.60725	0.00601331	-2.3094
MF	GO:0001077	transcriptional activator activity, RNA polymerase II core promoter proximal region sequence-specific binding	12	EGR1	-2.61645	0.00601331	-2.3094
MF	GO:0001077	transcriptional activator activity, RNA polymerase II core promoter proximal region sequence-specific binding	12	EHF	-4.37984	0.00601331	-2.3094
MF	GO:0001077	transcriptional activator activity, RNA polymerase II core promoter proximal region sequence-specific binding	12	IRF1	-5.55004	0.00601331	-2.3094
MF	GO:0001077	transcriptional activator activity, RNA polymerase II core promoter proximal region sequence-specific binding	12	NR4A2	-4.59329	0.00601331	-2.3094
MF	GO:0001077	transcriptional activator activity, RNA polymerase II core promoter proximal region sequence-specific binding	12	NR4A3	-3.54991	0.00601331	-2.3094
MF	GO:0001077	transcriptional activator activity, RNA polymerase II core promoter proximal region sequence-specific binding	12	TLX1	3.43892	0.00601331	-2.3094
BP	GO:0006874	cellular calcium ion homeostasis	7	PIK3CB	-3.23358	0.00601331	0.377964
BP	GO:0006874	cellular calcium ion homeostasis	7	SLC24A4	2.58827	0.00601331	0.377964
BP	GO:0006874	cellular calcium ion homeostasis	7	STC1	-2.72918	0.00601331	0.377964
BP	GO:0006874	cellular calcium ion homeostasis	7	STC2	3.0717	0.00601331	0.377964
BP	GO:0006874	cellular calcium ion homeostasis	7	ATP13A5	-5.30716	0.00601331	0.377964
BP	GO:0006874	cellular calcium ion homeostasis	7	TRPM8	2.21558	0.00601331	0.377964
BP	GO:0006874	cellular calcium ion homeostasis	7	DRD3	3.27493	0.00601331	0.377964
CC	GO:0005623	cell	12	OLFM1	2.39194	0.00601331	-1.73205
CC	GO:0005623	cell	12	FASN	-3.34785	0.00601331	-1.73205
CC	GO:0005623	cell	12	MAP2	-2.45976	0.00601331	-1.73205
CC	GO:0005623	cell	12	SPP1	-5.29461	0.00601331	-1.73205
CC	GO:0005623	cell	12	LCN8	-6.16581	0.00601331	-1.73205
CC	GO:0005623	cell	12	LRAT	2.44789	0.00601331	-1.73205
CC	GO:0005623	cell	12	MYO1F	-2.16113	0.00601331	-1.73205
CC	GO:0005623	cell	12	ISL2	-5.08127	0.00601331	-1.73205
CC	GO:0005623	cell	12	CALD1	-2.71508	0.00601331	-1.73205
CC	GO:0005623	cell	12	CYP3A7	-3.73565	0.00601331	-1.73205
CC	GO:0005623	cell	12	RYR3	2.21324	0.00601331	-1.73205
CC	GO:0005623	cell	12	FAM3B	-3.948	0.00601331	-1.73205
MF	GO:0003725	double-stranded RNA binding	5	IFIH1	-4.94328	0.00601331	-2.23607
MF	GO:0003725	double-stranded RNA binding	5	OASL	-10.5761	0.00601331	-2.23607
MF	GO:0003725	double-stranded RNA binding	5	EIF2AK2	-3.57317	0.00601331	-2.23607
MF	GO:0003725	double-stranded RNA binding	5	DHX58	-4.13259	0.00601331	-2.23607
MF	GO:0003725	double-stranded RNA binding	5	TLR3	-3.50239	0.00601331	-2.23607
MF	GO:0004867	serine-type endopeptidase inhibitor activity	7	SERPINA3	-8.50677	0.00601331	-1.13389
MF	GO:0004867	serine-type endopeptidase inhibitor activity	7	SERPINA5	2.21751	0.00601331	-1.13389
MF	GO:0004867	serine-type endopeptidase inhibitor activity	7	SERPINB2	-3.10815	0.00601331	-1.13389
MF	GO:0004867	serine-type endopeptidase inhibitor activity	7	SERPINE2	-3.29095	0.00601331	-1.13389
MF	GO:0004867	serine-type endopeptidase inhibitor activity	7	SERPINF1	-3.15296	0.00601331	-1.13389
MF	GO:0004867	serine-type endopeptidase inhibitor activity	7	SERPINB10	-5.18929	0.00601331	-1.13389
MF	GO:0004867	serine-type endopeptidase inhibitor activity	7	WFIKKN1	2.33808	0.00601331	-1.13389
BP	GO:0060291	long-term synaptic potentiation	4	VAMP2	-4.38357	0.00601331	0
BP	GO:0060291	long-term synaptic potentiation	4	GRIN2A	2.56105	0.00601331	0
BP	GO:0060291	long-term synaptic potentiation	4	SERPINE2	-3.29095	0.00601331	0
BP	GO:0060291	long-term synaptic potentiation	4	LRRTM1	5.65819	0.00601331	0
CC	GO:0009897	external side of plasma membrane	12	IL6	#NAME?	0.00627367	-2.3094
CC	GO:0009897	external side of plasma membrane	12	TNFRSF18	-2.32658	0.00627367	-2.3094
CC	GO:0009897	external side of plasma membrane	12	CD36	2.25228	0.00627367	-2.3094
CC	GO:0009897	external side of plasma membrane	12	CD83	-2.90691	0.00627367	-2.3094
CC	GO:0009897	external side of plasma membrane	12	CD86	-3.48059	0.00627367	-2.3094
CC	GO:0009897	external side of plasma membrane	12	KIT	-3.11937	0.00627367	-2.3094
CC	GO:0009897	external side of plasma membrane	12	VCAM1	-4.32224	0.00627367	-2.3094
CC	GO:0009897	external side of plasma membrane	12	P2RX7	-6.33028	0.00627367	-2.3094
CC	GO:0009897	external side of plasma membrane	12	B2M	-4.65875	0.00627367	-2.3094
CC	GO:0009897	external side of plasma membrane	12	TRPM8	2.21558	0.00627367	-2.3094
CC	GO:0009897	external side of plasma membrane	12	LOC100858751	-2.90125	0.00627367	-2.3094
CC	GO:0009897	external side of plasma membrane	12	IL7R	-3.82773	0.00627367	-2.3094
MF	GO:0042277	peptide binding	5	BDKRB1	-3.69248	0.0067293	-1.34164
MF	GO:0042277	peptide binding	5	AVPR1B	#NAME?	0.0067293	-1.34164
MF	GO:0042277	peptide binding	5	ERAP1	-2.51906	0.0067293	-1.34164
MF	GO:0042277	peptide binding	5	LNPEP	-2.23931	0.0067293	-1.34164
MF	GO:0042277	peptide binding	5	TRHDE	2.13868	0.0067293	-1.34164
MF	GO:0004896	cytokine receptor activity	4	CD44	-2.63858	0.00701796	-2
MF	GO:0004896	cytokine receptor activity	4	IL12B	-5.16565	0.00701796	-2
MF	GO:0004896	cytokine receptor activity	4	IL4R	-2.37867	0.00701796	-2
MF	GO:0004896	cytokine receptor activity	4	IL7R	-3.82773	0.00701796	-2
BP	GO:0060548	negative regulation of cell death	4	PACRG	2.74222	0.00701796	0
BP	GO:0060548	negative regulation of cell death	4	CYR61	-2.11968	0.00701796	0
BP	GO:0060548	negative regulation of cell death	4	LOC776271	2.68216	0.00701796	0
BP	GO:0060548	negative regulation of cell death	4	AGR2	-4.40324	0.00701796	0
BP	GO:0006898	receptor-mediated endocytosis	8	AMN	2.00254	0.00746772	-1.41421
BP	GO:0006898	receptor-mediated endocytosis	8	TMPRSS2	2.24667	0.00746772	-1.41421
BP	GO:0006898	receptor-mediated endocytosis	8	ACKR2	-2.81743	0.00746772	-1.41421
BP	GO:0006898	receptor-mediated endocytosis	8	ACKR4	-3.18339	0.00746772	-1.41421
BP	GO:0006898	receptor-mediated endocytosis	8	DMBT1L	-6.5332	0.00746772	-1.41421
BP	GO:0006898	receptor-mediated endocytosis	8	MARCO	-2.24639	0.00746772	-1.41421
BP	GO:0006898	receptor-mediated endocytosis	8	LOC771089	-3.78166	0.00746772	-1.41421
BP	GO:0006898	receptor-mediated endocytosis	8	PIT54	-3.86629	0.00746772	-1.41421
MF	GO:0051117	ATPase binding	5	ATP6V1G3	-9.77209	0.00757008	-2.23607
MF	GO:0051117	ATPase binding	5	TCIRG1	-3.43398	0.00757008	-2.23607
MF	GO:0051117	ATPase binding	5	USP25	-2.24815	0.00757008	-2.23607
MF	GO:0051117	ATPase binding	5	SNX10	-5.15428	0.00757008	-2.23607
MF	GO:0051117	ATPase binding	5	PDE4D	-2.11396	0.00757008	-2.23607
MF	GO:0005506	iron ion binding	11	XDH	-3.70198	0.0080981	-0.301511
MF	GO:0005506	iron ion binding	11	MFI2	2.64662	0.0080981	-0.301511
MF	GO:0005506	iron ion binding	11	CYP4B1	4.87904	0.0080981	-0.301511
MF	GO:0005506	iron ion binding	11	PAH	2.16434	0.0080981	-0.301511
MF	GO:0005506	iron ion binding	11	TPH1	-5.94222	0.0080981	-0.301511
MF	GO:0005506	iron ion binding	11	ALOX5	-2.14083	0.0080981	-0.301511
MF	GO:0005506	iron ion binding	11	CYP1B1	3.45329	0.0080981	-0.301511
MF	GO:0005506	iron ion binding	11	CYP24A1	-2.74946	0.0080981	-0.301511
MF	GO:0005506	iron ion binding	11	CYP11A1	-2.81166	0.0080981	-0.301511
MF	GO:0005506	iron ion binding	11	LOC422528	2.11064	0.0080981	-0.301511
MF	GO:0005506	iron ion binding	11	CYP3A7	-3.73565	0.0080981	-0.301511
BP	GO:0043124	negative regulation of I-kappaB kinase/NF-kappaB signaling	4	STAT1	-5.75558	0.00825794	-2
BP	GO:0043124	negative regulation of I-kappaB kinase/NF-kappaB signaling	4	TNFAIP3	-2.22653	0.00825794	-2
BP	GO:0043124	negative regulation of I-kappaB kinase/NF-kappaB signaling	4	OTUD7A	-2.09819	0.00825794	-2
BP	GO:0043124	negative regulation of I-kappaB kinase/NF-kappaB signaling	4	TNIP3	-5.63032	0.00825794	-2
BP	GO:0007157	heterophilic cell-cell adhesion via plasma membrane cell adhesion molecules	4	VCAM1	-4.32224	0.00825794	-2
BP	GO:0007157	heterophilic cell-cell adhesion via plasma membrane cell adhesion molecules	4	SELE	-5.46111	0.00825794	-2
BP	GO:0007157	heterophilic cell-cell adhesion via plasma membrane cell adhesion molecules	4	LOC770026	-3.10005	0.00825794	-2
BP	GO:0007157	heterophilic cell-cell adhesion via plasma membrane cell adhesion molecules	4	CRTAM	-2.95463	0.00825794	-2
BP	GO:0051209	release of sequestered calcium ion into cytosol	4	P2RX7	-6.33028	0.00825794	-1
BP	GO:0051209	release of sequestered calcium ion into cytosol	4	RYR3	2.21324	0.00825794	-1
BP	GO:0051209	release of sequestered calcium ion into cytosol	4	CCL19	-7.00579	0.00825794	-1
BP	GO:0051209	release of sequestered calcium ion into cytosol	4	HTR2B	-2.24109	0.00825794	-1
CC	GO:0016324	apical plasma membrane	10	AMN	2.00254	0.00862807	-1.26491
CC	GO:0016324	apical plasma membrane	10	CA4	-3.25053	0.00862807	-1.26491
CC	GO:0016324	apical plasma membrane	10	TCIRG1	-3.43398	0.00862807	-1.26491
CC	GO:0016324	apical plasma membrane	10	P2RX2	-4.30592	0.00862807	-1.26491
CC	GO:0016324	apical plasma membrane	10	DLL1	-2.19239	0.00862807	-1.26491
CC	GO:0016324	apical plasma membrane	10	RAB17	-4.97044	0.00862807	-1.26491
CC	GO:0016324	apical plasma membrane	10	CYP3A7	-3.73565	0.00862807	-1.26491
CC	GO:0016324	apical plasma membrane	10	SLC26A6	2.23047	0.00862807	-1.26491
CC	GO:0016324	apical plasma membrane	10	TRPM6	-4.36657	0.00862807	-1.26491
CC	GO:0016324	apical plasma membrane	10	ATP2B2	2.90659	0.00862807	-1.26491
BP	GO:0010951	negative regulation of endopeptidase activity	9	SERPINA3	-8.50677	0.00894192	-1
BP	GO:0010951	negative regulation of endopeptidase activity	9	SERPINA5	2.21751	0.00894192	-1
BP	GO:0010951	negative regulation of endopeptidase activity	9	SERPINB2	-3.10815	0.00894192	-1
BP	GO:0010951	negative regulation of endopeptidase activity	9	SERPINE2	-3.29095	0.00894192	-1
BP	GO:0010951	negative regulation of endopeptidase activity	9	SERPINF1	-3.15296	0.00894192	-1
BP	GO:0010951	negative regulation of endopeptidase activity	9	SERPINB10	-5.18929	0.00894192	-1
BP	GO:0010951	negative regulation of endopeptidase activity	9	WFIKKN1	2.33808	0.00894192	-1
BP	GO:0010951	negative regulation of endopeptidase activity	9	AHSG	2.64631	0.00894192	-1
BP	GO:0010951	negative regulation of endopeptidase activity	9	A2ML4	-3.45158	0.00894192	-1
BP	GO:0010628	positive regulation of gene expression	11	OLFM1	2.39194	0.00924319	-2.7136
BP	GO:0010628	positive regulation of gene expression	11	SHH	-2.54731	0.00924319	-2.7136
BP	GO:0010628	positive regulation of gene expression	11	PIK3CB	-3.23358	0.00924319	-2.7136
BP	GO:0010628	positive regulation of gene expression	11	C1QTNF6	-2.87858	0.00924319	-2.7136
BP	GO:0010628	positive regulation of gene expression	11	KIT	-3.11937	0.00924319	-2.7136
BP	GO:0010628	positive regulation of gene expression	11	P2RX7	-6.33028	0.00924319	-2.7136
BP	GO:0010628	positive regulation of gene expression	11	CDH3	-2.40862	0.00924319	-2.7136
BP	GO:0010628	positive regulation of gene expression	11	CNTF	-2.60902	0.00924319	-2.7136
BP	GO:0010628	positive regulation of gene expression	11	PTGFR	-4.34224	0.00924319	-2.7136
BP	GO:0010628	positive regulation of gene expression	11	AGR2	-4.40324	0.00924319	-2.7136
BP	GO:0010628	positive regulation of gene expression	11	IL7R	-3.82773	0.00924319	-2.7136
BP	GO:0042102	positive regulation of T cell proliferation	4	IL6	#NAME?	0.00988698	-2
BP	GO:0042102	positive regulation of T cell proliferation	4	CD86	-3.48059	0.00988698	-2
BP	GO:0042102	positive regulation of T cell proliferation	4	VCAM1	-4.32224	0.00988698	-2
BP	GO:0042102	positive regulation of T cell proliferation	4	PRKCQ	-3.4783	0.00988698	-2
BP	GO:0007267	cell-cell signaling	6	SHH	-2.54731	0.0101232	-0.816497
BP	GO:0007267	cell-cell signaling	6	LNPEP	-2.23931	0.0101232	-0.816497
BP	GO:0007267	cell-cell signaling	6	GJA1	-3.31272	0.0101232	-0.816497
BP	GO:0007267	cell-cell signaling	6	CYR61	-2.11968	0.0101232	-0.816497
BP	GO:0007267	cell-cell signaling	6	LOC776271	2.68216	0.0101232	-0.816497
BP	GO:0007267	cell-cell signaling	6	TRHDE	2.13868	0.0101232	-0.816497
BP	GO:0070374	positive regulation of ERK1 and ERK2 cascade	9	CD36	2.25228	0.0104945	-2.33333
BP	GO:0070374	positive regulation of ERK1 and ERK2 cascade	9	CD44	-2.63858	0.0104945	-2.33333
BP	GO:0070374	positive regulation of ERK1 and ERK2 cascade	9	CCLI10	-4.23727	0.0104945	-2.33333
BP	GO:0070374	positive regulation of ERK1 and ERK2 cascade	9	LOC417536	-6.37823	0.0104945	-2.33333
BP	GO:0070374	positive regulation of ERK1 and ERK2 cascade	9	FGF19	-6.94008	0.0104945	-2.33333
BP	GO:0070374	positive regulation of ERK1 and ERK2 cascade	9	CCL19	-7.00579	0.0104945	-2.33333
BP	GO:0070374	positive regulation of ERK1 and ERK2 cascade	9	HTR2B	-2.24109	0.0104945	-2.33333
BP	GO:0070374	positive regulation of ERK1 and ERK2 cascade	9	CCL4	-8.54195	0.0104945	-2.33333
BP	GO:0070374	positive regulation of ERK1 and ERK2 cascade	9	CX3CL1	-4.35592	0.0104945	-2.33333
BP	GO:0007204	positive regulation of cytosolic calcium ion concentration	5	CD36	2.25228	0.0111172	-1.34164
BP	GO:0007204	positive regulation of cytosolic calcium ion concentration	5	C1QTNF6	-2.87858	0.0111172	-1.34164
BP	GO:0007204	positive regulation of cytosolic calcium ion concentration	5	IKZF1	-2.50218	0.0111172	-1.34164
BP	GO:0007204	positive regulation of cytosolic calcium ion concentration	5	C3AR1	-3.08397	0.0111172	-1.34164
BP	GO:0007204	positive regulation of cytosolic calcium ion concentration	5	PTGFR	-4.34224	0.0111172	-1.34164
MF	GO:0003823	antigen binding	5	LOC100859134	-2.80247	0.0111172	-2.23607
MF	GO:0003823	antigen binding	5	YF6	-2.22903	0.0111172	-2.23607
MF	GO:0003823	antigen binding	5	BF1	-3.97719	0.0111172	-2.23607
MF	GO:0003823	antigen binding	5	LOC100859374	-3.78116	0.0111172	-2.23607
MF	GO:0003823	antigen binding	5	LOC768350	-2.5924	0.0111172	-2.23607
BP	GO:0009636	response to toxic substance	4	CNP	-3.23783	0.0113007	-2
BP	GO:0009636	response to toxic substance	4	EIF2AK2	-3.57317	0.0113007	-2
BP	GO:0009636	response to toxic substance	4	TRPM6	-4.36657	0.0113007	-2
BP	GO:0009636	response to toxic substance	4	SLC6A14	-5.76058	0.0113007	-2
CC	GO:0043204	perikaryon	4	LOC423919	-2.14069	0.0125035	-1
CC	GO:0043204	perikaryon	4	OLFM1	2.39194	0.0125035	-1
CC	GO:0043204	perikaryon	4	TMEM100	-2.62421	0.0125035	-1
CC	GO:0043204	perikaryon	4	AVPR1B	#NAME?	0.0125035	-1
MF	GO:0000979	RNA polymerase II core promoter sequence-specific DNA binding	5	STAT1	-5.75558	0.0125035	-2.23607
MF	GO:0000979	RNA polymerase II core promoter sequence-specific DNA binding	5	SPI1	-2.10206	0.0125035	-2.23607
MF	GO:0000979	RNA polymerase II core promoter sequence-specific DNA binding	5	GATA3	-2.7965	0.0125035	-2.23607
MF	GO:0000979	RNA polymerase II core promoter sequence-specific DNA binding	5	NLRC5	-3.47047	0.0125035	-2.23607
MF	GO:0000979	RNA polymerase II core promoter sequence-specific DNA binding	5	NR4A2	-4.59329	0.0125035	-2.23607
BP	GO:0046330	positive regulation of JNK cascade	5	FGF19	-6.94008	0.0125035	-2.23607
BP	GO:0046330	positive regulation of JNK cascade	5	CCL19	-7.00579	0.0125035	-2.23607
BP	GO:0046330	positive regulation of JNK cascade	5	MYD88	-2.49259	0.0125035	-2.23607
BP	GO:0046330	positive regulation of JNK cascade	5	LOC100859853	-3.60999	0.0125035	-2.23607
BP	GO:0046330	positive regulation of JNK cascade	5	TLR3	-3.50239	0.0125035	-2.23607
BP	GO:0045444	fat cell differentiation	5	SOCS1	-5.51812	0.0131193	-2.23607
BP	GO:0045444	fat cell differentiation	5	INHBB	-2.4036	0.0131193	-2.23607
BP	GO:0045444	fat cell differentiation	5	NR4A2	-4.59329	0.0131193	-2.23607
BP	GO:0045444	fat cell differentiation	5	NR4A3	-3.54991	0.0131193	-2.23607
BP	GO:0045444	fat cell differentiation	5	STEAP4	-4.45283	0.0131193	-2.23607
BP	GO:0033209	tumor necrosis factor-mediated signaling pathway	4	STAT1	-5.75558	0.0145139	-2
BP	GO:0033209	tumor necrosis factor-mediated signaling pathway	4	TNFRSF18	-2.32658	0.0145139	-2
BP	GO:0033209	tumor necrosis factor-mediated signaling pathway	4	TNFRSF6B	-5.15294	0.0145139	-2
BP	GO:0033209	tumor necrosis factor-mediated signaling pathway	4	TNFRSF8	-2.43634	0.0145139	-2
BP	GO:0030968	endoplasmic reticulum unfolded protein response	4	STC2	3.0717	0.0145139	0
BP	GO:0030968	endoplasmic reticulum unfolded protein response	4	EIF2AK2	-3.57317	0.0145139	0
BP	GO:0030968	endoplasmic reticulum unfolded protein response	4	ATF3	-2.49525	0.0145139	0
BP	GO:0030968	endoplasmic reticulum unfolded protein response	4	CREB3L3	2.05613	0.0145139	0
BP	GO:0050830	defense response to Gram-positive bacterium	4	CD36	2.25228	0.0165885	-1
BP	GO:0050830	defense response to Gram-positive bacterium	4	P2RX7	-6.33028	0.0165885	-1
BP	GO:0050830	defense response to Gram-positive bacterium	4	B2M	-4.65875	0.0165885	-1
BP	GO:0050830	defense response to Gram-positive bacterium	4	MYD88	-2.49259	0.0165885	-1
MF	GO:0005251	delayed rectifier potassium channel activity	4	KCNA3	-4.73581	0.0191172	1
MF	GO:0005251	delayed rectifier potassium channel activity	4	KCNB2	2.45691	0.0191172	1
MF	GO:0005251	delayed rectifier potassium channel activity	4	KCNC1	4.02755	0.0191172	1
MF	GO:0005251	delayed rectifier potassium channel activity	4	KCNE2	3.03334	0.0191172	1
BP	GO:0007626	locomotory behavior	6	PITX3	2.33147	0.0196202	1.63299
BP	GO:0007626	locomotory behavior	6	LRRTM1	5.65819	0.0196202	1.63299
BP	GO:0007626	locomotory behavior	6	PAK6	2.82421	0.0196202	1.63299
BP	GO:0007626	locomotory behavior	6	PAK7	-2.08354	0.0196202	1.63299
BP	GO:0007626	locomotory behavior	6	DRD3	3.27493	0.0196202	1.63299
BP	GO:0007626	locomotory behavior	6	ATP2B2	2.90659	0.0196202	1.63299
MF	GO:0020037	heme binding	9	CYP4B1	4.87904	0.0204031	1
MF	GO:0020037	heme binding	9	CYP1B1	3.45329	0.0204031	1
MF	GO:0020037	heme binding	9	CYP24A1	-2.74946	0.0204031	1
MF	GO:0020037	heme binding	9	CYP11A1	-2.81166	0.0204031	1
MF	GO:0020037	heme binding	9	LOC422528	2.11064	0.0204031	1
MF	GO:0020037	heme binding	9	STC2	3.0717	0.0204031	1
MF	GO:0020037	heme binding	9	CYP3A7	-3.73565	0.0204031	1
MF	GO:0020037	heme binding	9	INDOL1	4.18359	0.0204031	1
MF	GO:0020037	heme binding	9	GUCY1A3	2.03916	0.0204031	1
BP	GO:0046426	negative regulation of JAK-STAT cascade	4	CISH	-2.46919	0.0204031	-1
BP	GO:0046426	negative regulation of JAK-STAT cascade	4	SOCS1	-5.51812	0.0204031	-1
BP	GO:0046426	negative regulation of JAK-STAT cascade	4	SOCS3	-6.8782	0.0204031	-1
BP	GO:0046426	negative regulation of JAK-STAT cascade	4	LRRTM1	5.65819	0.0204031	-1
BP	GO:0051260	protein homooligomerization	9	SPTBN5	-6.71519	0.0204031	-1.66667
BP	GO:0051260	protein homooligomerization	9	C1QTNF6	-2.87858	0.0204031	-1.66667
BP	GO:0051260	protein homooligomerization	9	P2RX2	-4.30592	0.0204031	-1.66667
BP	GO:0051260	protein homooligomerization	9	KCNA3	-4.73581	0.0204031	-1.66667
BP	GO:0051260	protein homooligomerization	9	KCNB2	2.45691	0.0204031	-1.66667
BP	GO:0051260	protein homooligomerization	9	KCNC1	4.02755	0.0204031	-1.66667
BP	GO:0051260	protein homooligomerization	9	IKBKE	-2.3627	0.0204031	-1.66667
BP	GO:0051260	protein homooligomerization	9	SCUBE3	-3.39442	0.0204031	-1.66667
BP	GO:0051260	protein homooligomerization	9	LNX1	-2.15218	0.0204031	-1.66667
BP	GO:0043066	negative regulation of apoptotic process	13	IL6	#NAME?	0.0205903	-3.60555
BP	GO:0043066	negative regulation of apoptotic process	13	SHH	-2.54731	0.0205903	-3.60555
BP	GO:0043066	negative regulation of apoptotic process	13	NKX2-6	-4.97888	0.0205903	-3.60555
BP	GO:0043066	negative regulation of apoptotic process	13	LCN8	-6.16581	0.0205903	-3.60555
BP	GO:0043066	negative regulation of apoptotic process	13	PLK3	-2.0048	0.0205903	-3.60555
BP	GO:0043066	negative regulation of apoptotic process	13	TOR4A	-2.2331	0.0205903	-3.60555
BP	GO:0043066	negative regulation of apoptotic process	13	PIM1	-2.83355	0.0205903	-3.60555
BP	GO:0043066	negative regulation of apoptotic process	13	SOCS3	-6.8782	0.0205903	-3.60555
BP	GO:0043066	negative regulation of apoptotic process	13	EIF2AK2	-3.57317	0.0205903	-3.60555
BP	GO:0043066	negative regulation of apoptotic process	13	HTR2B	-2.24109	0.0205903	-3.60555
BP	GO:0043066	negative regulation of apoptotic process	13	CYR61	-2.11968	0.0205903	-3.60555
BP	GO:0043066	negative regulation of apoptotic process	13	PTGFR	-4.34224	0.0205903	-3.60555
BP	GO:0043066	negative regulation of apoptotic process	13	CAPN3	-2.58869	0.0205903	-3.60555
BP	GO:0042493	response to drug	6	LCN8	-6.16581	0.0222623	-0.816497
BP	GO:0042493	response to drug	6	P2RX7	-6.33028	0.0222623	-0.816497
BP	GO:0042493	response to drug	6	GRIN2A	2.56105	0.0222623	-0.816497
BP	GO:0042493	response to drug	6	TRPA1	3.06345	0.0222623	-0.816497
BP	GO:0042493	response to drug	6	HTR2B	-2.24109	0.0222623	-0.816497
BP	GO:0042493	response to drug	6	JUN	-2.39833	0.0222623	-0.816497
BP	GO:0051092	positive regulation of NF-kappaB transcription factor activity	6	TRIM25	-2.23889	0.0222623	-2.44949
BP	GO:0051092	positive regulation of NF-kappaB transcription factor activity	6	EIF2AK2	-3.57317	0.0222623	-2.44949
BP	GO:0051092	positive regulation of NF-kappaB transcription factor activity	6	MYD88	-2.49259	0.0222623	-2.44949
BP	GO:0051092	positive regulation of NF-kappaB transcription factor activity	6	PRKCQ	-3.4783	0.0222623	-2.44949
BP	GO:0051092	positive regulation of NF-kappaB transcription factor activity	6	TLR3	-3.50239	0.0222623	-2.44949
BP	GO:0051092	positive regulation of NF-kappaB transcription factor activity	6	CAPN3	-2.58869	0.0222623	-2.44949
BP	GO:0055114	oxidation-reduction process	28	XDH	-3.70198	0.0237574	-1.13389
BP	GO:0055114	oxidation-reduction process	28	FASN	-3.34785	0.0237574	-1.13389
BP	GO:0055114	oxidation-reduction process	28	LOC770996	2.33904	0.0237574	-1.13389
BP	GO:0055114	oxidation-reduction process	28	CYP4B1	4.87904	0.0237574	-1.13389
BP	GO:0055114	oxidation-reduction process	28	PAH	2.16434	0.0237574	-1.13389
BP	GO:0055114	oxidation-reduction process	28	VCAM1	-4.32224	0.0237574	-1.13389
BP	GO:0055114	oxidation-reduction process	28	TPH1	-5.94222	0.0237574	-1.13389
BP	GO:0055114	oxidation-reduction process	28	ALDH8A1	2.06176	0.0237574	-1.13389
BP	GO:0055114	oxidation-reduction process	28	ALOX5	-2.14083	0.0237574	-1.13389
BP	GO:0055114	oxidation-reduction process	28	PRODH	-3.53953	0.0237574	-1.13389
BP	GO:0055114	oxidation-reduction process	28	CYP1B1	3.45329	0.0237574	-1.13389
BP	GO:0055114	oxidation-reduction process	28	FMO4	4.89712	0.0237574	-1.13389
BP	GO:0055114	oxidation-reduction process	28	IL4I1	-8.09588	0.0237574	-1.13389
BP	GO:0055114	oxidation-reduction process	28	CYP24A1	-2.74946	0.0237574	-1.13389
BP	GO:0055114	oxidation-reduction process	28	CYP11A1	-2.81166	0.0237574	-1.13389
BP	GO:0055114	oxidation-reduction process	28	LOC422528	2.11064	0.0237574	-1.13389
BP	GO:0055114	oxidation-reduction process	28	SOD3	-3.963	0.0237574	-1.13389
BP	GO:0055114	oxidation-reduction process	28	NOXO1	-7.10585	0.0237574	-1.13389
BP	GO:0055114	oxidation-reduction process	28	CYP3A7	-3.73565	0.0237574	-1.13389
BP	GO:0055114	oxidation-reduction process	28	DIO2	-7.0149	0.0237574	-1.13389
BP	GO:0055114	oxidation-reduction process	28	CP	-5.72767	0.0237574	-1.13389
BP	GO:0055114	oxidation-reduction process	28	PIPOX	2.35394	0.0237574	-1.13389
BP	GO:0055114	oxidation-reduction process	28	LDHA	-2.43825	0.0237574	-1.13389
BP	GO:0055114	oxidation-reduction process	28	INDOL1	4.18359	0.0237574	-1.13389
BP	GO:0055114	oxidation-reduction process	28	HSD3B2	2.46662	0.0237574	-1.13389
BP	GO:0055114	oxidation-reduction process	28	HSD3B7	4.12317	0.0237574	-1.13389
BP	GO:0055114	oxidation-reduction process	28	GLRX	-2.61528	0.0237574	-1.13389
BP	GO:0055114	oxidation-reduction process	28	STEAP4	-4.45283	0.0237574	-1.13389
BP	GO:0007165	signal transduction	20	BCL11B	-2.03518	0.0260171	-2.23607
BP	GO:0007165	signal transduction	20	STAT2	-3.77861	0.0260171	-2.23607
BP	GO:0007165	signal transduction	20	GATA3	-2.7965	0.0260171	-2.23607
BP	GO:0007165	signal transduction	20	CD83	-2.90691	0.0260171	-2.23607
BP	GO:0007165	signal transduction	20	THBD	-3.63149	0.0260171	-2.23607
BP	GO:0007165	signal transduction	20	RASSF5	-2.40516	0.0260171	-2.23607
BP	GO:0007165	signal transduction	20	SARM1	-2.06739	0.0260171	-2.23607
BP	GO:0007165	signal transduction	20	SELE	-5.46111	0.0260171	-2.23607
BP	GO:0007165	signal transduction	20	LNPEP	-2.23931	0.0260171	-2.23607
BP	GO:0007165	signal transduction	20	AKAP9	-2.27716	0.0260171	-2.23607
BP	GO:0007165	signal transduction	20	TAGAP	-2.62984	0.0260171	-2.23607
BP	GO:0007165	signal transduction	20	GABRB2	3.3302	0.0260171	-2.23607
BP	GO:0007165	signal transduction	20	CYR61	-2.11968	0.0260171	-2.23607
BP	GO:0007165	signal transduction	20	LOC776271	2.68216	0.0260171	-2.23607
BP	GO:0007165	signal transduction	20	SDC4	-3.66733	0.0260171	-2.23607
BP	GO:0007165	signal transduction	20	TLR15	-3.80695	0.0260171	-2.23607
BP	GO:0007165	signal transduction	20	TRHDE	2.13868	0.0260171	-2.23607
BP	GO:0007165	signal transduction	20	PPAPDC1A	2.24164	0.0260171	-2.23607
BP	GO:0007165	signal transduction	20	GUCY1A3	2.03916	0.0260171	-2.23607
BP	GO:0007165	signal transduction	20	PDE9A	-3.30352	0.0260171	-2.23607
BP	GO:0016485	protein processing	5	CTSG	-2.22545	0.0263767	-1.34164
BP	GO:0016485	protein processing	5	CTSS	-2.70067	0.0263767	-1.34164
BP	GO:0016485	protein processing	5	P2RX7	-6.33028	0.0263767	-1.34164
BP	GO:0016485	protein processing	5	PCSK1	-2.95596	0.0263767	-1.34164
BP	GO:0016485	protein processing	5	PCSK4	2.74871	0.0263767	-1.34164
BP	GO:0098655	cation transmembrane transport	5	P2RX2	-4.30592	0.0263767	-1.34164
BP	GO:0098655	cation transmembrane transport	5	ATP13A5	-5.30716	0.0263767	-1.34164
BP	GO:0098655	cation transmembrane transport	5	TRPM6	-4.36657	0.0263767	-1.34164
BP	GO:0098655	cation transmembrane transport	5	SLC41A2	-3.10712	0.0263767	-1.34164
BP	GO:0098655	cation transmembrane transport	5	NALCN	2.95489	0.0263767	-1.34164
BP	GO:0008584	male gonad development	4	GATA3	-2.7965	0.0270054	-2
BP	GO:0008584	male gonad development	4	KIT	-3.11937	0.0270054	-2
BP	GO:0008584	male gonad development	4	LRRC6	-3.05819	0.0270054	-2
BP	GO:0008584	male gonad development	4	KLHL10	-4.70022	0.0270054	-2
BP	GO:0035914	skeletal muscle cell differentiation	4	SMYD1	-4.50532	0.0270054	-2
BP	GO:0035914	skeletal muscle cell differentiation	4	EGR1	-2.61645	0.0270054	-2
BP	GO:0035914	skeletal muscle cell differentiation	4	ATF3	-2.49525	0.0270054	-2
BP	GO:0035914	skeletal muscle cell differentiation	4	BTG2	-2.89452	0.0270054	-2
MF	GO:0008289	lipid binding	5	CETP	4.6761	0.0289153	1.34164
MF	GO:0008289	lipid binding	5	CD36	2.25228	0.0289153	1.34164
MF	GO:0008289	lipid binding	5	ACOT11	2.68605	0.0289153	1.34164
MF	GO:0008289	lipid binding	5	SH3GL3	2.13738	0.0289153	1.34164
MF	GO:0008289	lipid binding	5	APOLD1	-2.17697	0.0289153	1.34164
MF	GO:0000978	RNA polymerase II core promoter proximal region sequence-specific DNA binding	14	STAT1	-5.75558	0.0289153	-2.67261
MF	GO:0000978	RNA polymerase II core promoter proximal region sequence-specific DNA binding	14	PITX3	2.33147	0.0289153	-2.67261
MF	GO:0000978	RNA polymerase II core promoter proximal region sequence-specific DNA binding	14	SPI1	-2.10206	0.0289153	-2.67261
MF	GO:0000978	RNA polymerase II core promoter proximal region sequence-specific DNA binding	14	FOS	-3.35279	0.0289153	-2.67261
MF	GO:0000978	RNA polymerase II core promoter proximal region sequence-specific DNA binding	14	RBPJL	-4.96881	0.0289153	-2.67261
MF	GO:0000978	RNA polymerase II core promoter proximal region sequence-specific DNA binding	14	ETV6	-2.00796	0.0289153	-2.67261
MF	GO:0000978	RNA polymerase II core promoter proximal region sequence-specific DNA binding	14	ELF3	-7.60725	0.0289153	-2.67261
MF	GO:0000978	RNA polymerase II core promoter proximal region sequence-specific DNA binding	14	EHF	-4.37984	0.0289153	-2.67261
MF	GO:0000978	RNA polymerase II core promoter proximal region sequence-specific DNA binding	14	JUN	-2.39833	0.0289153	-2.67261
MF	GO:0000978	RNA polymerase II core promoter proximal region sequence-specific DNA binding	14	ATF3	-2.49525	0.0289153	-2.67261
MF	GO:0000978	RNA polymerase II core promoter proximal region sequence-specific DNA binding	14	IRF1	-5.55004	0.0289153	-2.67261
MF	GO:0000978	RNA polymerase II core promoter proximal region sequence-specific DNA binding	14	FOSL2	-4.56736	0.0289153	-2.67261
MF	GO:0000978	RNA polymerase II core promoter proximal region sequence-specific DNA binding	14	NR4A3	-3.54991	0.0289153	-2.67261
MF	GO:0000978	RNA polymerase II core promoter proximal region sequence-specific DNA binding	14	TLX1	3.43892	0.0289153	-2.67261
BP	GO:0023014	signal transduction by protein phosphorylation	5	KIT	-3.11937	0.0289153	-0.447214
BP	GO:0023014	signal transduction by protein phosphorylation	5	BMPR1B	2.28181	0.0289153	-0.447214
BP	GO:0023014	signal transduction by protein phosphorylation	5	PAK6	2.82421	0.0289153	-0.447214
BP	GO:0023014	signal transduction by protein phosphorylation	5	PAK7	-2.08354	0.0289153	-0.447214
BP	GO:0023014	signal transduction by protein phosphorylation	5	MAP3K8	-6.41874	0.0289153	-0.447214
MF	GO:0005262	calcium channel activity	4	GRIN2A	2.56105	0.0302295	2
MF	GO:0005262	calcium channel activity	4	SLC24A4	2.58827	0.0302295	2
MF	GO:0005262	calcium channel activity	4	TRPA1	3.06345	0.0302295	2
MF	GO:0005262	calcium channel activity	4	TRPM8	2.21558	0.0302295	2
MF	GO:0004860	protein kinase inhibitor activity	4	CISH	-2.46919	0.0302295	-1
MF	GO:0004860	protein kinase inhibitor activity	4	SOCS1	-5.51812	0.0302295	-1
MF	GO:0004860	protein kinase inhibitor activity	4	SOCS3	-6.8782	0.0302295	-1
MF	GO:0004860	protein kinase inhibitor activity	4	LRRTM1	5.65819	0.0302295	-1
MF	GO:0004252	serine-type endopeptidase activity	8	C1R	-2.58096	0.0328933	-0.707107
MF	GO:0004252	serine-type endopeptidase activity	8	C1S	-3.94806	0.0328933	-0.707107
MF	GO:0004252	serine-type endopeptidase activity	8	CTSG	-2.22545	0.0328933	-0.707107
MF	GO:0004252	serine-type endopeptidase activity	8	PRSS35	2.30095	0.0328933	-0.707107
MF	GO:0004252	serine-type endopeptidase activity	8	TMPRSS2	2.24667	0.0328933	-0.707107
MF	GO:0004252	serine-type endopeptidase activity	8	TMPRSS7	-3.48371	0.0328933	-0.707107
MF	GO:0004252	serine-type endopeptidase activity	8	PCSK1	-2.95596	0.0328933	-0.707107
MF	GO:0004252	serine-type endopeptidase activity	8	PCSK4	2.74871	0.0328933	-0.707107
BP	GO:0000902	cell morphogenesis	4	P2RX7	-6.33028	0.0333779	-2
BP	GO:0000902	cell morphogenesis	4	KLHL10	-4.70022	0.0333779	-2
BP	GO:0000902	cell morphogenesis	4	LIPA	-2.6001	0.0333779	-2
BP	GO:0000902	cell morphogenesis	4	IL7R	-3.82773	0.0333779	-2
CC	GO:0045202	synapse	8	OLFM1	2.39194	0.0369356	0.707107
CC	GO:0045202	synapse	8	CHRM3	-4.06083	0.0369356	0.707107
CC	GO:0045202	synapse	8	MYRIP	-4.68862	0.0369356	0.707107
CC	GO:0045202	synapse	8	SARM1	-2.06739	0.0369356	0.707107
CC	GO:0045202	synapse	8	GABRA4	3.70677	0.0369356	0.707107
CC	GO:0045202	synapse	8	GABRB2	3.3302	0.0369356	0.707107
CC	GO:0045202	synapse	8	GABRG3	2.71863	0.0369356	0.707107
CC	GO:0045202	synapse	8	PACSIN1	3.22308	0.0369356	0.707107
MF	GO:0004702	receptor signaling protein serine/threonine kinase activity	5	MAP2K6	2.56911	0.0383885	0.447214
MF	GO:0004702	receptor signaling protein serine/threonine kinase activity	5	BMPR1B	2.28181	0.0383885	0.447214
MF	GO:0004702	receptor signaling protein serine/threonine kinase activity	5	PAK6	2.82421	0.0383885	0.447214
MF	GO:0004702	receptor signaling protein serine/threonine kinase activity	5	PAK7	-2.08354	0.0383885	0.447214
MF	GO:0004702	receptor signaling protein serine/threonine kinase activity	5	MAP3K8	-6.41874	0.0383885	0.447214
BP	GO:0042981	regulation of apoptotic process	8	TNFRSF18	-2.32658	0.0383885	-2.82843
BP	GO:0042981	regulation of apoptotic process	8	TNFRSF6B	-5.15294	0.0383885	-2.82843
BP	GO:0042981	regulation of apoptotic process	8	TNFRSF8	-2.43634	0.0383885	-2.82843
BP	GO:0042981	regulation of apoptotic process	8	RASSF5	-2.40516	0.0383885	-2.82843
BP	GO:0042981	regulation of apoptotic process	8	SARM1	-2.06739	0.0383885	-2.82843
BP	GO:0042981	regulation of apoptotic process	8	BIRC2	-3.09022	0.0383885	-2.82843
BP	GO:0042981	regulation of apoptotic process	8	EGR1	-2.61645	0.0383885	-2.82843
BP	GO:0042981	regulation of apoptotic process	8	INHBB	-2.4036	0.0383885	-2.82843
BP	GO:0034765	regulation of ion transmembrane transport	6	KCNA3	-4.73581	0.039031	0
BP	GO:0034765	regulation of ion transmembrane transport	6	KCNB2	2.45691	0.039031	0
BP	GO:0034765	regulation of ion transmembrane transport	6	KCNC1	4.02755	0.039031	0
BP	GO:0034765	regulation of ion transmembrane transport	6	KCNJ5	-2.03998	0.039031	0
BP	GO:0034765	regulation of ion transmembrane transport	6	KCNJ15	-2.46853	0.039031	0
BP	GO:0034765	regulation of ion transmembrane transport	6	NALCN	2.95489	0.039031	0
BP	GO:0006469	negative regulation of protein kinase activity	5	CISH	-2.46919	0.0397374	-1.34164
BP	GO:0006469	negative regulation of protein kinase activity	5	SOCS1	-5.51812	0.0397374	-1.34164
BP	GO:0006469	negative regulation of protein kinase activity	5	SOCS3	-6.8782	0.0397374	-1.34164
BP	GO:0006469	negative regulation of protein kinase activity	5	LRRTM1	5.65819	0.0397374	-1.34164
BP	GO:0006469	negative regulation of protein kinase activity	5	LOC100859853	-3.60999	0.0397374	-1.34164
CC	GO:0008076	voltage-gated potassium channel complex	5	AKAP9	-2.27716	0.0397374	0.447214
CC	GO:0008076	voltage-gated potassium channel complex	5	KCNA3	-4.73581	0.0397374	0.447214
CC	GO:0008076	voltage-gated potassium channel complex	5	KCNB2	2.45691	0.0397374	0.447214
CC	GO:0008076	voltage-gated potassium channel complex	5	KCNC1	4.02755	0.0397374	0.447214
CC	GO:0008076	voltage-gated potassium channel complex	5	KCNE2	3.03334	0.0397374	0.447214
BP	GO:0000187	activation of MAPK activity	4	MAP2K6	2.56911	0.0413267	-1
BP	GO:0000187	activation of MAPK activity	4	CD81	-2.03888	0.0413267	-1
BP	GO:0000187	activation of MAPK activity	4	KIT	-3.11937	0.0413267	-1
BP	GO:0000187	activation of MAPK activity	4	P2RX7	-6.33028	0.0413267	-1
BP	GO:0001501	skeletal system development	4	EPHA2	-2.15599	0.0413267	-1
BP	GO:0001501	skeletal system development	4	MMP9	-4.4387	0.0413267	-1
BP	GO:0001501	skeletal system development	4	WFIKKN1	2.33808	0.0413267	-1
BP	GO:0001501	skeletal system development	4	CHRD	-2.34972	0.0413267	-1
BP	GO:0007156	homophilic cell adhesion via plasma membrane adhesion molecules	7	PIK3CB	-3.23358	0.0415897	-2.64575
BP	GO:0007156	homophilic cell adhesion via plasma membrane adhesion molecules	7	CDH3	-2.40862	0.0415897	-2.64575
BP	GO:0007156	homophilic cell adhesion via plasma membrane adhesion molecules	7	CDH20	-2.05871	0.0415897	-2.64575
BP	GO:0007156	homophilic cell adhesion via plasma membrane adhesion molecules	7	LOC770026	-3.10005	0.0415897	-2.64575
BP	GO:0007156	homophilic cell adhesion via plasma membrane adhesion molecules	7	PCDH10	-2.46326	0.0415897	-2.64575
BP	GO:0007156	homophilic cell adhesion via plasma membrane adhesion molecules	7	PCDH17	-2.5348	0.0415897	-2.64575
BP	GO:0007156	homophilic cell adhesion via plasma membrane adhesion molecules	7	CRTAM	-2.95463	0.0415897	-2.64575
MF	GO:0005179	hormone activity	5	CNP1	2.55526	0.0425847	-0.447214
MF	GO:0005179	hormone activity	5	STC1	-2.72918	0.0425847	-0.447214
MF	GO:0005179	hormone activity	5	STC2	3.0717	0.0425847	-0.447214
MF	GO:0005179	hormone activity	5	INHBB	-2.4036	0.0425847	-0.447214
MF	GO:0005179	hormone activity	5	VIP	-3.06424	0.0425847	-0.447214
BP	GO:0006629	lipid metabolic process	4	NAAA	-2.05371	0.048219	-1
BP	GO:0006629	lipid metabolic process	4	LCN8	-6.16581	0.048219	-1
BP	GO:0006629	lipid metabolic process	4	SLC16A1	2.1543	0.048219	-1
BP	GO:0006629	lipid metabolic process	4	LIPG	-2.52717	0.048219	-1
BP	GO:0006915	apoptotic process	7	TMEM173	-4.34968	0.048219	-1.13389
BP	GO:0006915	apoptotic process	7	GAS2	2.13292	0.048219	-1.13389
BP	GO:0006915	apoptotic process	7	PAK7	-2.08354	0.048219	-1.13389
BP	GO:0006915	apoptotic process	7	MAP3K8	-6.41874	0.048219	-1.13389
BP	GO:0006915	apoptotic process	7	IRF1	-5.55004	0.048219	-1.13389
BP	GO:0006915	apoptotic process	7	CASP1	-2.08026	0.048219	-1.13389
BP	GO:0006915	apoptotic process	7	RNF152	2.0537	0.048219	-1.13389
MF	GO:0008201	heparin binding	6	SPP1	-5.29461	0.048219	-0.816497
MF	GO:0008201	heparin binding	6	SERPINE2	-3.29095	0.048219	-0.816497
MF	GO:0008201	heparin binding	6	CYR61	-2.11968	0.048219	-0.816497
MF	GO:0008201	heparin binding	6	GREM2	4.1523	0.048219	-0.816497
MF	GO:0008201	heparin binding	6	LOC776271	2.68216	0.048219	-0.816497
MF	GO:0008201	heparin binding	6	CHRD	-2.34972	0.048219	-0.816497
CC	GO:0005764	lysosome	7	CTSS	-2.70067	0.0488208	-0.377964
CC	GO:0005764	lysosome	7	NAAA	-2.05371	0.0488208	-0.377964
CC	GO:0005764	lysosome	7	ZC3HAV1	-2.29838	0.0488208	-0.377964
CC	GO:0005764	lysosome	7	DRAM1	-4.93325	0.0488208	-0.377964
CC	GO:0005764	lysosome	7	KCNE2	3.03334	0.0488208	-0.377964
CC	GO:0005764	lysosome	7	2018-03-03	Inf	0.0488208	-0.377964
CC	GO:0005764	lysosome	7	RNF152	2.0537	0.0488208	-0.377964
BP	GO:0043410	positive regulation of MAPK cascade	4	IL6	#NAME?	0.0542421	-2
BP	GO:0043410	positive regulation of MAPK cascade	4	C1QTNF6	-2.87858	0.0542421	-2
BP	GO:0043410	positive regulation of MAPK cascade	4	TNFRSF6B	-5.15294	0.0542421	-2
BP	GO:0043410	positive regulation of MAPK cascade	4	PELI2	-2.04701	0.0542421	-2
BP	GO:0006366	transcription from RNA polymerase II promoter	15	BCL11B	-2.03518	0.055734	-1.80739
BP	GO:0006366	transcription from RNA polymerase II promoter	15	NMI	-4.28815	0.055734	-1.80739
BP	GO:0006366	transcription from RNA polymerase II promoter	15	PITX3	2.33147	0.055734	-1.80739
BP	GO:0006366	transcription from RNA polymerase II promoter	15	SPI1	-2.10206	0.055734	-1.80739
BP	GO:0006366	transcription from RNA polymerase II promoter	15	GATA3	-2.7965	0.055734	-1.80739
BP	GO:0006366	transcription from RNA polymerase II promoter	15	LOC100858693	2.20924	0.055734	-1.80739
BP	GO:0006366	transcription from RNA polymerase II promoter	15	ETV6	-2.00796	0.055734	-1.80739
BP	GO:0006366	transcription from RNA polymerase II promoter	15	ELF3	-7.60725	0.055734	-1.80739
BP	GO:0006366	transcription from RNA polymerase II promoter	15	EGR1	-2.61645	0.055734	-1.80739
BP	GO:0006366	transcription from RNA polymerase II promoter	15	EHF	-4.37984	0.055734	-1.80739
BP	GO:0006366	transcription from RNA polymerase II promoter	15	IRF1	-5.55004	0.055734	-1.80739
BP	GO:0006366	transcription from RNA polymerase II promoter	15	CREB3L3	2.05613	0.055734	-1.80739
BP	GO:0006366	transcription from RNA polymerase II promoter	15	NR4A2	-4.59329	0.055734	-1.80739
BP	GO:0006366	transcription from RNA polymerase II promoter	15	NR4A3	-3.54991	0.055734	-1.80739
BP	GO:0006366	transcription from RNA polymerase II promoter	15	TLX1	3.43892	0.055734	-1.80739
BP	GO:0001649	osteoblast differentiation	5	SPP1	-5.29461	0.0569401	-2.23607
BP	GO:0001649	osteoblast differentiation	5	EPHA2	-2.15599	0.0569401	-2.23607
BP	GO:0001649	osteoblast differentiation	5	CYP24A1	-2.74946	0.0569401	-2.23607
BP	GO:0001649	osteoblast differentiation	5	CYR61	-2.11968	0.0569401	-2.23607
BP	GO:0001649	osteoblast differentiation	5	CHRD	-2.34972	0.0569401	-2.23607
CC	GO:0005777	peroxisome	4	XDH	-3.70198	0.0586764	1
CC	GO:0005777	peroxisome	4	HAO1	2.4138	0.0586764	1
CC	GO:0005777	peroxisome	4	HAO2	2.7188	0.0586764	1
CC	GO:0005777	peroxisome	4	PIPOX	2.35394	0.0586764	1
CC	GO:0045177	apical part of cell	4	CD36	2.25228	0.0586764	0
CC	GO:0045177	apical part of cell	4	REEP6	2.31993	0.0586764	0
CC	GO:0045177	apical part of cell	4	VCAM1	-4.32224	0.0586764	0
CC	GO:0045177	apical part of cell	4	CYP3A7	-3.73565	0.0586764	0
BP	GO:0042391	regulation of membrane potential	4	SLC1A6	-5.23642	0.0586764	-1
BP	GO:0042391	regulation of membrane potential	4	PXK	-2.27221	0.0586764	-1
BP	GO:0042391	regulation of membrane potential	4	SLC26A3	-5.86014	0.0586764	-1
BP	GO:0042391	regulation of membrane potential	4	SLC26A6	2.23047	0.0586764	-1
MF	GO:0003779	actin binding	11	SPIRE2	-3.69772	0.0595042	-2.7136
MF	GO:0003779	actin binding	11	ABLIM2	-2.42801	0.0595042	-2.7136
MF	GO:0003779	actin binding	11	MYO1F	-2.16113	0.0595042	-2.7136
MF	GO:0003779	actin binding	11	MYO1G	-2.31226	0.0595042	-2.7136
MF	GO:0003779	actin binding	11	PXK	-2.27221	0.0595042	-2.7136
MF	GO:0003779	actin binding	11	MYRIP	-4.68862	0.0595042	-2.7136
MF	GO:0003779	actin binding	11	MYO7B	-4.25785	0.0595042	-2.7136
MF	GO:0003779	actin binding	11	PHACTR3	-2.04085	0.0595042	-2.7136
MF	GO:0003779	actin binding	11	PACRG	2.74222	0.0595042	-2.7136
MF	GO:0003779	actin binding	11	CALD1	-2.71508	0.0595042	-2.7136
MF	GO:0003779	actin binding	11	PARVG	-2.33494	0.0595042	-2.7136
BP	GO:0030509	BMP signaling pathway	4	TMEM100	-2.62421	0.0604179	0
BP	GO:0030509	BMP signaling pathway	4	BMPR1B	2.28181	0.0604179	0
BP	GO:0030509	BMP signaling pathway	4	EGR1	-2.61645	0.0604179	0
BP	GO:0030509	BMP signaling pathway	4	SLC39A5	2.00976	0.0604179	0
CC	GO:0030054	cell junction	10	OLFM1	2.39194	0.0633408	1.89737
CC	GO:0030054	cell junction	10	GRIA3	3.28613	0.0633408	1.89737
CC	GO:0030054	cell junction	10	GRIA4	6.26307	0.0633408	1.89737
CC	GO:0030054	cell junction	10	CHRM3	-4.06083	0.0633408	1.89737
CC	GO:0030054	cell junction	10	PTPRR	-2.54644	0.0633408	1.89737
CC	GO:0030054	cell junction	10	GRIN2A	2.56105	0.0633408	1.89737
CC	GO:0030054	cell junction	10	AMPH	4.38554	0.0633408	1.89737
CC	GO:0030054	cell junction	10	GABRA4	3.70677	0.0633408	1.89737
CC	GO:0030054	cell junction	10	GABRB2	3.3302	0.0633408	1.89737
CC	GO:0030054	cell junction	10	GABRG3	2.71863	0.0633408	1.89737
CC	GO:0005576	extracellular region	16	SHH	-2.54731	0.064116	-1.5
CC	GO:0005576	extracellular region	16	PRRG4	-4.20125	0.064116	-1.5
CC	GO:0005576	extracellular region	16	C1R	-2.58096	0.064116	-1.5
CC	GO:0005576	extracellular region	16	SPP2	2.07658	0.064116	-1.5
CC	GO:0005576	extracellular region	16	SFRP1	2.10803	0.064116	-1.5
CC	GO:0005576	extracellular region	16	AVD	-13.0783	0.064116	-1.5
CC	GO:0005576	extracellular region	16	FGF19	-6.94008	0.064116	-1.5
CC	GO:0005576	extracellular region	16	HPX	-4.17795	0.064116	-1.5
CC	GO:0005576	extracellular region	16	CNP1	2.55526	0.064116	-1.5
CC	GO:0005576	extracellular region	16	WFIKKN1	2.33808	0.064116	-1.5
CC	GO:0005576	extracellular region	16	IGFBP2	3.20671	0.064116	-1.5
CC	GO:0005576	extracellular region	16	PTGFR	-4.34224	0.064116	-1.5
CC	GO:0005576	extracellular region	16	CHIA	-3.33622	0.064116	-1.5
CC	GO:0005576	extracellular region	16	APOLD1	-2.17697	0.064116	-1.5
CC	GO:0005576	extracellular region	16	VIP	-3.06424	0.064116	-1.5
CC	GO:0005576	extracellular region	16	IL10	-8.53781	0.064116	-1.5
MF	GO:0003824	catalytic activity	4	ACSM4	Inf	0.0651013	-1
MF	GO:0003824	catalytic activity	4	LOC101750112	-5.52719	0.0651013	-1
MF	GO:0003824	catalytic activity	4	RSAD2	-12.0768	0.0651013	-1
MF	GO:0003824	catalytic activity	4	CAPN3	-2.58869	0.0651013	-1
CC	GO:0005741	mitochondrial outer membrane	4	TMEM173	-4.34968	0.0695618	-2
CC	GO:0005741	mitochondrial outer membrane	4	HK2	-2.58894	0.0695618	-2
CC	GO:0005741	mitochondrial outer membrane	4	LPIN1	-3.75606	0.0695618	-2
CC	GO:0005741	mitochondrial outer membrane	4	RSAD2	-12.0768	0.0695618	-2
BP	GO:0006508	proteolysis	16	CAPN6	2.64365	0.0712245	-1.5
BP	GO:0006508	proteolysis	16	C1R	-2.58096	0.0712245	-1.5
BP	GO:0006508	proteolysis	16	C1S	-3.94806	0.0712245	-1.5
BP	GO:0006508	proteolysis	16	PRSS35	2.30095	0.0712245	-1.5
BP	GO:0006508	proteolysis	16	LOC101751203	2.22808	0.0712245	-1.5
BP	GO:0006508	proteolysis	16	TMPRSS7	-3.48371	0.0712245	-1.5
BP	GO:0006508	proteolysis	16	MMP1	-5.16957	0.0712245	-1.5
BP	GO:0006508	proteolysis	16	MMP7	#NAME?	0.0712245	-1.5
BP	GO:0006508	proteolysis	16	MMP9	-4.4387	0.0712245	-1.5
BP	GO:0006508	proteolysis	16	ERAP1	-2.51906	0.0712245	-1.5
BP	GO:0006508	proteolysis	16	LNPEP	-2.23931	0.0712245	-1.5
BP	GO:0006508	proteolysis	16	CPA6	4.18538	0.0712245	-1.5
BP	GO:0006508	proteolysis	16	ADAMTSL2	-2.09912	0.0712245	-1.5
BP	GO:0006508	proteolysis	16	TRHDE	2.13868	0.0712245	-1.5
BP	GO:0006508	proteolysis	16	CASP1	-2.08026	0.0712245	-1.5
BP	GO:0006508	proteolysis	16	CAPN3	-2.58869	0.0712245	-1.5
BP	GO:1902476	chloride transmembrane transport	5	ANO9	-3.73155	0.075972	-1.34164
BP	GO:1902476	chloride transmembrane transport	5	BEST4	-4.51527	0.075972	-1.34164
BP	GO:1902476	chloride transmembrane transport	5	SLC26A3	-5.86014	0.075972	-1.34164
BP	GO:1902476	chloride transmembrane transport	5	SLC26A6	2.23047	0.075972	-1.34164
BP	GO:1902476	chloride transmembrane transport	5	LOC424523	#NAME?	0.075972	-1.34164
BP	GO:0045944	positive regulation of transcription from RNA polymerase II promoter	29	IL6	#NAME?	0.076064	-4.27099
BP	GO:0045944	positive regulation of transcription from RNA polymerase II promoter	29	HELZ2	-4.28776	0.076064	-4.27099
BP	GO:0045944	positive regulation of transcription from RNA polymerase II promoter	29	BCL11B	-2.03518	0.076064	-4.27099
BP	GO:0045944	positive regulation of transcription from RNA polymerase II promoter	29	STAT1	-5.75558	0.076064	-4.27099
BP	GO:0045944	positive regulation of transcription from RNA polymerase II promoter	29	STAT4	-2.14006	0.076064	-4.27099
BP	GO:0045944	positive regulation of transcription from RNA polymerase II promoter	29	NFKB2	-2.49807	0.076064	-4.27099
BP	GO:0045944	positive regulation of transcription from RNA polymerase II promoter	29	PITX3	2.33147	0.076064	-4.27099
BP	GO:0045944	positive regulation of transcription from RNA polymerase II promoter	29	GATA3	-2.7965	0.076064	-4.27099
BP	GO:0045944	positive regulation of transcription from RNA polymerase II promoter	29	CD81	-2.03888	0.076064	-4.27099
BP	GO:0045944	positive regulation of transcription from RNA polymerase II promoter	29	IKZF1	-2.50218	0.076064	-4.27099
BP	GO:0045944	positive regulation of transcription from RNA polymerase II promoter	29	NLRC5	-3.47047	0.076064	-4.27099
BP	GO:0045944	positive regulation of transcription from RNA polymerase II promoter	29	DLL1	-2.19239	0.076064	-4.27099
BP	GO:0045944	positive regulation of transcription from RNA polymerase II promoter	29	LOC100858693	2.20924	0.076064	-4.27099
BP	GO:0045944	positive regulation of transcription from RNA polymerase II promoter	29	ETV6	-2.00796	0.076064	-4.27099
BP	GO:0045944	positive regulation of transcription from RNA polymerase II promoter	29	ELF3	-7.60725	0.076064	-4.27099
BP	GO:0045944	positive regulation of transcription from RNA polymerase II promoter	29	EGR1	-2.61645	0.076064	-4.27099
BP	GO:0045944	positive regulation of transcription from RNA polymerase II promoter	29	EHF	-4.37984	0.076064	-4.27099
BP	GO:0045944	positive regulation of transcription from RNA polymerase II promoter	29	LPIN1	-3.75606	0.076064	-4.27099
BP	GO:0045944	positive regulation of transcription from RNA polymerase II promoter	29	JUN	-2.39833	0.076064	-4.27099
BP	GO:0045944	positive regulation of transcription from RNA polymerase II promoter	29	CYR61	-2.11968	0.076064	-4.27099
BP	GO:0045944	positive regulation of transcription from RNA polymerase II promoter	29	IRF1	-5.55004	0.076064	-4.27099
BP	GO:0045944	positive regulation of transcription from RNA polymerase II promoter	29	CBFA2T2	-2.35192	0.076064	-4.27099
BP	GO:0045944	positive regulation of transcription from RNA polymerase II promoter	29	CREM	-3.16921	0.076064	-4.27099
BP	GO:0045944	positive regulation of transcription from RNA polymerase II promoter	29	TLR3	-3.50239	0.076064	-4.27099
BP	GO:0045944	positive regulation of transcription from RNA polymerase II promoter	29	TNIP2	-3.66782	0.076064	-4.27099
BP	GO:0045944	positive regulation of transcription from RNA polymerase II promoter	29	IL10	-8.53781	0.076064	-4.27099
BP	GO:0045944	positive regulation of transcription from RNA polymerase II promoter	29	NR4A2	-4.59329	0.076064	-4.27099
BP	GO:0045944	positive regulation of transcription from RNA polymerase II promoter	29	NR4A3	-3.54991	0.076064	-4.27099
BP	GO:0045944	positive regulation of transcription from RNA polymerase II promoter	29	TLX1	3.43892	0.076064	-4.27099
MF	GO:0005102	receptor binding	9	AMN	2.00254	0.0786276	0.333333
MF	GO:0005102	receptor binding	9	FKBP1B	2.06907	0.0786276	0.333333
MF	GO:0005102	receptor binding	9	HAO1	2.4138	0.0786276	0.333333
MF	GO:0005102	receptor binding	9	HAO2	2.7188	0.0786276	0.333333
MF	GO:0005102	receptor binding	9	SERPINE2	-3.29095	0.0786276	0.333333
MF	GO:0005102	receptor binding	9	LOC770026	-3.10005	0.0786276	0.333333
MF	GO:0005102	receptor binding	9	STYK1	-2.10944	0.0786276	0.333333
MF	GO:0005102	receptor binding	9	PIPOX	2.35394	0.0786276	0.333333
MF	GO:0005102	receptor binding	9	CRTAM	-2.95463	0.0786276	0.333333
BP	GO:0043524	negative regulation of neuron apoptotic process	5	DLX1	#NAME?	0.0804361	-1.34164
BP	GO:0043524	negative regulation of neuron apoptotic process	5	CNTF	-2.60902	0.0804361	-1.34164
BP	GO:0043524	negative regulation of neuron apoptotic process	5	GABRB2	3.3302	0.0804361	-1.34164
BP	GO:0043524	negative regulation of neuron apoptotic process	5	NR4A2	-4.59329	0.0804361	-1.34164
BP	GO:0043524	negative regulation of neuron apoptotic process	5	NR4A3	-3.54991	0.0804361	-1.34164
CC	GO:0005765	lysosomal membrane	8	ATP6V1C2	-2.182	0.0825629	-0.707107
CC	GO:0005765	lysosomal membrane	8	SLC30A2	2.68847	0.0825629	-0.707107
CC	GO:0005765	lysosomal membrane	8	TCIRG1	-3.43398	0.0825629	-0.707107
CC	GO:0005765	lysosomal membrane	8	SCARB2	2.99583	0.0825629	-0.707107
CC	GO:0005765	lysosomal membrane	8	LNPEP	-2.23931	0.0825629	-0.707107
CC	GO:0005765	lysosomal membrane	8	CP	-5.72767	0.0825629	-0.707107
CC	GO:0005765	lysosomal membrane	8	RNF152	2.0537	0.0825629	-0.707107
CC	GO:0005765	lysosomal membrane	8	TLR3	-3.50239	0.0825629	-0.707107
BP	GO:0043065	positive regulation of apoptotic process	6	IL6	#NAME?	0.0853759	-1.63299
BP	GO:0043065	positive regulation of apoptotic process	6	TNFRSF8	-2.43634	0.0853759	-1.63299
BP	GO:0043065	positive regulation of apoptotic process	6	GRIN2A	2.56105	0.0853759	-1.63299
BP	GO:0043065	positive regulation of apoptotic process	6	RIPK2	-2.78972	0.0853759	-1.63299
BP	GO:0043065	positive regulation of apoptotic process	6	LOC100859853	-3.60999	0.0853759	-1.63299
BP	GO:0043065	positive regulation of apoptotic process	6	NET1	-2.67786	0.0853759	-1.63299
MF	GO:0004725	protein tyrosine phosphatase activity	6	DUSP10	-2.09765	0.0853759	-2.44949
MF	GO:0004725	protein tyrosine phosphatase activity	6	PTPN2	-2.56548	0.0853759	-2.44949
MF	GO:0004725	protein tyrosine phosphatase activity	6	PTPRC	-2.64207	0.0853759	-2.44949
MF	GO:0004725	protein tyrosine phosphatase activity	6	PTPRR	-2.54644	0.0853759	-2.44949
MF	GO:0004725	protein tyrosine phosphatase activity	6	DUSP5	-2.2985	0.0853759	-2.44949
MF	GO:0004725	protein tyrosine phosphatase activity	6	DUSP8	-2.12056	0.0853759	-2.44949
BP	GO:0070588	calcium ion transmembrane transport	6	GRIN2A	2.56105	0.0853759	1.63299
BP	GO:0070588	calcium ion transmembrane transport	6	CACNA2D3	-4.32945	0.0853759	1.63299
BP	GO:0070588	calcium ion transmembrane transport	6	SLC24A4	2.58827	0.0853759	1.63299
BP	GO:0070588	calcium ion transmembrane transport	6	TRPA1	3.06345	0.0853759	1.63299
BP	GO:0070588	calcium ion transmembrane transport	6	TRPM8	2.21558	0.0853759	1.63299
BP	GO:0070588	calcium ion transmembrane transport	6	ATP2B2	2.90659	0.0853759	1.63299
MF	GO:0005178	integrin binding	4	VCAM1	-4.32224	0.0857277	-1
MF	GO:0005178	integrin binding	4	PTPN2	-2.56548	0.0857277	-1
MF	GO:0005178	integrin binding	4	CYR61	-2.11968	0.0857277	-1
MF	GO:0005178	integrin binding	4	LOC776271	2.68216	0.0857277	-1
CC	GO:0043231	intracellular membrane-bounded organelle	6	MITD1	-3.46012	0.0893988	-0.816497
CC	GO:0043231	intracellular membrane-bounded organelle	6	CD86	-3.48059	0.0893988	-0.816497
CC	GO:0043231	intracellular membrane-bounded organelle	6	CYP1B1	3.45329	0.0893988	-0.816497
CC	GO:0043231	intracellular membrane-bounded organelle	6	ATP13A5	-5.30716	0.0893988	-0.816497
CC	GO:0043231	intracellular membrane-bounded organelle	6	NEU2	-3.76766	0.0893988	-0.816497
CC	GO:0043231	intracellular membrane-bounded organelle	6	ATP2B2	2.90659	0.0893988	-0.816497
MF	GO:0019905	syntaxin binding	4	SYT16	2.32277	0.0911386	0
MF	GO:0019905	syntaxin binding	4	TC2N	3.47061	0.0911386	0
MF	GO:0019905	syntaxin binding	4	VAMP2	-4.38357	0.0911386	0
MF	GO:0019905	syntaxin binding	4	PTPN2	-2.56548	0.0911386	0
CC	GO:0000790	nuclear chromatin	6	STAT1	-5.75558	0.0961415	-2.44949
CC	GO:0000790	nuclear chromatin	6	SPI1	-2.10206	0.0961415	-2.44949
CC	GO:0000790	nuclear chromatin	6	GATA3	-2.7965	0.0961415	-2.44949
CC	GO:0000790	nuclear chromatin	6	SERPINB10	-5.18929	0.0961415	-2.44949
CC	GO:0000790	nuclear chromatin	6	JUN	-2.39833	0.0961415	-2.44949
CC	GO:0000790	nuclear chromatin	6	IRF1	-5.55004	0.0961415	-2.44949
MF	GO:0005524	ATP binding	54	MAP2K6	2.56911	0.0980363	-5.44331
MF	GO:0005524	ATP binding	54	MOV10	-3.14097	0.0980363	-5.44331
MF	GO:0005524	ATP binding	54	DDX60	-9.49972	0.0980363	-5.44331
MF	GO:0005524	ATP binding	54	ACSBG2	-4.91354	0.0980363	-5.44331
MF	GO:0005524	ATP binding	54	PEX6	2.9638	0.0980363	-5.44331
MF	GO:0005524	ATP binding	54	STK32B	2.05895	0.0980363	-5.44331
MF	GO:0005524	ATP binding	54	IFIH1	-4.94328	0.0980363	-5.44331
MF	GO:0005524	ATP binding	54	SMCHD1	-3.45058	0.0980363	-5.44331
MF	GO:0005524	ATP binding	54	TAP1	-5.67699	0.0980363	-5.44331
MF	GO:0005524	ATP binding	54	KIT	-3.11937	0.0980363	-5.44331
MF	GO:0005524	ATP binding	54	TAP2	-3.79877	0.0980363	-5.44331
MF	GO:0005524	ATP binding	54	BMPR1B	2.28181	0.0980363	-5.44331
MF	GO:0005524	ATP binding	54	ATP10B	-5.44992	0.0980363	-5.44331
MF	GO:0005524	ATP binding	54	ASS1	-2.90896	0.0980363	-5.44331
MF	GO:0005524	ATP binding	54	PLK3	-2.0048	0.0980363	-5.44331
MF	GO:0005524	ATP binding	54	APAF1	-3.12047	0.0980363	-5.44331
MF	GO:0005524	ATP binding	54	EPHA2	-2.15599	0.0980363	-5.44331
MF	GO:0005524	ATP binding	54	NLRC5	-3.47047	0.0980363	-5.44331
MF	GO:0005524	ATP binding	54	TOR4A	-2.2331	0.0980363	-5.44331
MF	GO:0005524	ATP binding	54	P2RX2	-4.30592	0.0980363	-5.44331
MF	GO:0005524	ATP binding	54	P2RX7	-6.33028	0.0980363	-5.44331
MF	GO:0005524	ATP binding	54	MYO1F	-2.16113	0.0980363	-5.44331
MF	GO:0005524	ATP binding	54	MYO1G	-2.31226	0.0980363	-5.44331
MF	GO:0005524	ATP binding	54	PXK	-2.27221	0.0980363	-5.44331
MF	GO:0005524	ATP binding	54	HK2	-2.58894	0.0980363	-5.44331
MF	GO:0005524	ATP binding	54	MYO7B	-4.25785	0.0980363	-5.44331
MF	GO:0005524	ATP binding	54	PIM1	-2.83355	0.0980363	-5.44331
MF	GO:0005524	ATP binding	54	RIPK2	-2.78972	0.0980363	-5.44331
MF	GO:0005524	ATP binding	54	OASL	-10.5761	0.0980363	-5.44331
MF	GO:0005524	ATP binding	54	RNF213	-5.30256	0.0980363	-5.44331
MF	GO:0005524	ATP binding	54	KIF5C	-2.48449	0.0980363	-5.44331
MF	GO:0005524	ATP binding	54	PAK6	2.82421	0.0980363	-5.44331
MF	GO:0005524	ATP binding	54	PAK7	-2.08354	0.0980363	-5.44331
MF	GO:0005524	ATP binding	54	EIF2AK2	-3.57317	0.0980363	-5.44331
MF	GO:0005524	ATP binding	54	CARNS1	-3.79138	0.0980363	-5.44331
MF	GO:0005524	ATP binding	54	STYK1	-2.10944	0.0980363	-5.44331
MF	GO:0005524	ATP binding	54	MAP3K8	-6.41874	0.0980363	-5.44331
MF	GO:0005524	ATP binding	54	DHX58	-4.13259	0.0980363	-5.44331
MF	GO:0005524	ATP binding	54	IKBKE	-2.3627	0.0980363	-5.44331
MF	GO:0005524	ATP binding	54	LOC416633	-2.24956	0.0980363	-5.44331
MF	GO:0005524	ATP binding	54	ATP13A5	-5.30716	0.0980363	-5.44331
MF	GO:0005524	ATP binding	54	TRPM6	-4.36657	0.0980363	-5.44331
MF	GO:0005524	ATP binding	54	MLKL	-7.78266	0.0980363	-5.44331
MF	GO:0005524	ATP binding	54	NEK10	3.3748	0.0980363	-5.44331
MF	GO:0005524	ATP binding	54	ALPK1	-4.09896	0.0980363	-5.44331
MF	GO:0005524	ATP binding	54	PFKFB3	-4.47755	0.0980363	-5.44331
MF	GO:0005524	ATP binding	54	CMPK2	-7.73705	0.0980363	-5.44331
MF	GO:0005524	ATP binding	54	PRKCQ	-3.4783	0.0980363	-5.44331
MF	GO:0005524	ATP binding	54	SIK1	-2.28075	0.0980363	-5.44331
MF	GO:0005524	ATP binding	54	PRKG2	-3.13298	0.0980363	-5.44331
MF	GO:0005524	ATP binding	54	LOC417192	#NAME?	0.0980363	-5.44331
MF	GO:0005524	ATP binding	54	CAMKK2	-2.00058	0.0980363	-5.44331
MF	GO:0005524	ATP binding	54	TRANK1	-4.57311	0.0980363	-5.44331
MF	GO:0005524	ATP binding	54	ATP2B2	2.90659	0.0980363	-5.44331
MF	GO:0044212	transcription regulatory region DNA binding	6	BCL11B	-2.03518	0.100625	-2.44949
MF	GO:0044212	transcription regulatory region DNA binding	6	GATA3	-2.7965	0.100625	-2.44949
MF	GO:0044212	transcription regulatory region DNA binding	6	IKZF1	-2.50218	0.100625	-2.44949
MF	GO:0044212	transcription regulatory region DNA binding	6	CBX4	-2.7323	0.100625	-2.44949
MF	GO:0044212	transcription regulatory region DNA binding	6	JUN	-2.39833	0.100625	-2.44949
MF	GO:0044212	transcription regulatory region DNA binding	6	ARID5A	-2.83696	0.100625	-2.44949
MF	GO:0004843	thiol-dependent ubiquitin-specific protease activity	4	USP2	2.09314	0.106708	-1
MF	GO:0004843	thiol-dependent ubiquitin-specific protease activity	4	TNFAIP3	-2.22653	0.106708	-1
MF	GO:0004843	thiol-dependent ubiquitin-specific protease activity	4	USP25	-2.24815	0.106708	-1
MF	GO:0004843	thiol-dependent ubiquitin-specific protease activity	4	OTUD7A	-2.09819	0.106708	-1
MF	GO:0000977	RNA polymerase II regulatory region sequence-specific DNA binding	7	STAT4	-2.14006	0.107201	-1.13389
MF	GO:0000977	RNA polymerase II regulatory region sequence-specific DNA binding	7	NFKB2	-2.49807	0.107201	-1.13389
MF	GO:0000977	RNA polymerase II regulatory region sequence-specific DNA binding	7	GATA3	-2.7965	0.107201	-1.13389
MF	GO:0000977	RNA polymerase II regulatory region sequence-specific DNA binding	7	LOC100858693	2.20924	0.107201	-1.13389
MF	GO:0000977	RNA polymerase II regulatory region sequence-specific DNA binding	7	DLX1	#NAME?	0.107201	-1.13389
MF	GO:0000977	RNA polymerase II regulatory region sequence-specific DNA binding	7	EGR1	-2.61645	0.107201	-1.13389
MF	GO:0000977	RNA polymerase II regulatory region sequence-specific DNA binding	7	CREB3L3	2.05613	0.107201	-1.13389
BP	GO:0043123	positive regulation of I-kappaB kinase/NF-kappaB signaling	6	CD36	2.25228	0.108673	-1.63299
BP	GO:0043123	positive regulation of I-kappaB kinase/NF-kappaB signaling	6	TRIM25	-2.23889	0.108673	-1.63299
BP	GO:0043123	positive regulation of I-kappaB kinase/NF-kappaB signaling	6	ZC3HAV1	-2.29838	0.108673	-1.63299
BP	GO:0043123	positive regulation of I-kappaB kinase/NF-kappaB signaling	6	HTR2B	-2.24109	0.108673	-1.63299
BP	GO:0043123	positive regulation of I-kappaB kinase/NF-kappaB signaling	6	IKBKE	-2.3627	0.108673	-1.63299
BP	GO:0043123	positive regulation of I-kappaB kinase/NF-kappaB signaling	6	TNIP2	-3.66782	0.108673	-1.63299
BP	GO:0035335	peptidyl-tyrosine dephosphorylation	6	DUSP10	-2.09765	0.108673	-2.44949
BP	GO:0035335	peptidyl-tyrosine dephosphorylation	6	PTPN2	-2.56548	0.108673	-2.44949
BP	GO:0035335	peptidyl-tyrosine dephosphorylation	6	PTPRC	-2.64207	0.108673	-2.44949
BP	GO:0035335	peptidyl-tyrosine dephosphorylation	6	PTPRR	-2.54644	0.108673	-2.44949
BP	GO:0035335	peptidyl-tyrosine dephosphorylation	6	DUSP5	-2.2985	0.108673	-2.44949
BP	GO:0035335	peptidyl-tyrosine dephosphorylation	6	DUSP8	-2.12056	0.108673	-2.44949
CC	GO:0048471	perinuclear region of cytoplasm	14	CAPN6	2.64365	0.115302	-2.13809
CC	GO:0048471	perinuclear region of cytoplasm	14	LOC423919	-2.14069	0.115302	-2.13809
CC	GO:0048471	perinuclear region of cytoplasm	14	STAT1	-5.75558	0.115302	-2.13809
CC	GO:0048471	perinuclear region of cytoplasm	14	TMEM100	-2.62421	0.115302	-2.13809
CC	GO:0048471	perinuclear region of cytoplasm	14	TMEM173	-4.34968	0.115302	-2.13809
CC	GO:0048471	perinuclear region of cytoplasm	14	VAMP2	-4.38357	0.115302	-2.13809
CC	GO:0048471	perinuclear region of cytoplasm	14	CA4	-3.25053	0.115302	-2.13809
CC	GO:0048471	perinuclear region of cytoplasm	14	USP2	2.09314	0.115302	-2.13809
CC	GO:0048471	perinuclear region of cytoplasm	14	SELE	-5.46111	0.115302	-2.13809
CC	GO:0048471	perinuclear region of cytoplasm	14	LNPEP	-2.23931	0.115302	-2.13809
CC	GO:0048471	perinuclear region of cytoplasm	14	STC2	3.0717	0.115302	-2.13809
CC	GO:0048471	perinuclear region of cytoplasm	14	EIF2AK2	-3.57317	0.115302	-2.13809
CC	GO:0048471	perinuclear region of cytoplasm	14	INHBB	-2.4036	0.115302	-2.13809
CC	GO:0048471	perinuclear region of cytoplasm	14	CALCOCO2	-2.43437	0.115302	-2.13809
MF	GO:0005215	transporter activity	4	LCN8	-6.16581	0.11629	-2
MF	GO:0005215	transporter activity	4	FABP1	-4.2027	0.11629	-2
MF	GO:0005215	transporter activity	4	FABP3	-2.01611	0.11629	-2
MF	GO:0005215	transporter activity	4	SLC51B	-2.83885	0.11629	-2
BP	GO:0030198	extracellular matrix organization	4	MMP9	-4.4387	0.11629	-2
BP	GO:0030198	extracellular matrix organization	4	ELF3	-7.60725	0.11629	-2
BP	GO:0030198	extracellular matrix organization	4	ADAMTSL2	-2.09912	0.11629	-2
BP	GO:0030198	extracellular matrix organization	4	CYR61	-2.11968	0.11629	-2
MF	GO:0044325	ion channel binding	4	FKBP1B	2.06907	0.122171	0
MF	GO:0044325	ion channel binding	4	AKAP9	-2.27716	0.122171	0
MF	GO:0044325	ion channel binding	4	KCNE2	3.03334	0.122171	0
MF	GO:0044325	ion channel binding	4	PDE4D	-2.11396	0.122171	0
BP	GO:0008284	positive regulation of cell proliferation	10	NKX2-6	-4.97888	0.128436	-1.89737
BP	GO:0008284	positive regulation of cell proliferation	10	LCN8	-6.16581	0.128436	-1.89737
BP	GO:0008284	positive regulation of cell proliferation	10	KIT	-3.11937	0.128436	-1.89737
BP	GO:0008284	positive regulation of cell proliferation	10	MAB21L2	2.17353	0.128436	-1.89737
BP	GO:0008284	positive regulation of cell proliferation	10	DLL1	-2.19239	0.128436	-1.89737
BP	GO:0008284	positive regulation of cell proliferation	10	FGF19	-6.94008	0.128436	-1.89737
BP	GO:0008284	positive regulation of cell proliferation	10	RAB25	2.2498	0.128436	-1.89737
BP	GO:0008284	positive regulation of cell proliferation	10	CNTF	-2.60902	0.128436	-1.89737
BP	GO:0008284	positive regulation of cell proliferation	10	PTGFR	-4.34224	0.128436	-1.89737
BP	GO:0008284	positive regulation of cell proliferation	10	IL34	-2.53726	0.128436	-1.89737
CC	GO:0005667	transcription factor complex	7	GFI1B	-2.59143	0.136205	-2.64575
CC	GO:0005667	transcription factor complex	7	GATA3	-2.7965	0.136205	-2.64575
CC	GO:0005667	transcription factor complex	7	FOS	-3.35279	0.136205	-2.64575
CC	GO:0005667	transcription factor complex	7	RBPJL	-4.96881	0.136205	-2.64575
CC	GO:0005667	transcription factor complex	7	JUN	-2.39833	0.136205	-2.64575
CC	GO:0005667	transcription factor complex	7	CREM	-3.16921	0.136205	-2.64575
CC	GO:0005667	transcription factor complex	7	NR4A3	-3.54991	0.136205	-2.64575
BP	GO:0010629	negative regulation of gene expression	4	OLFM1	2.39194	0.138543	0
BP	GO:0010629	negative regulation of gene expression	4	CDKN1A	-3.51063	0.138543	0
BP	GO:0010629	negative regulation of gene expression	4	FGF19	-6.94008	0.138543	0
BP	GO:0010629	negative regulation of gene expression	4	STC2	3.0717	0.138543	0
CC	GO:0016323	basolateral plasma membrane	4	RAB17	-4.97044	0.145095	1
CC	GO:0016323	basolateral plasma membrane	4	SLC39A5	2.00976	0.145095	1
CC	GO:0016323	basolateral plasma membrane	4	SLC26A6	2.23047	0.145095	1
CC	GO:0016323	basolateral plasma membrane	4	AQP3	2.83829	0.145095	1
MF	GO:0004930	G-protein coupled receptor activity	9	GPR17	-2.6357	0.145944	-1.66667
MF	GO:0004930	G-protein coupled receptor activity	9	LOC428816	-3.39256	0.145944	-1.66667
MF	GO:0004930	G-protein coupled receptor activity	9	SFRP1	2.10803	0.145944	-1.66667
MF	GO:0004930	G-protein coupled receptor activity	9	GPRC5A	-3.30266	0.145944	-1.66667
MF	GO:0004930	G-protein coupled receptor activity	9	GPR132	-4.14517	0.145944	-1.66667
MF	GO:0004930	G-protein coupled receptor activity	9	SCTR	-3.25834	0.145944	-1.66667
MF	GO:0004930	G-protein coupled receptor activity	9	CRHR2	-2.17825	0.145944	-1.66667
MF	GO:0004930	G-protein coupled receptor activity	9	LOC101752158	-5.2441	0.145944	-1.66667
MF	GO:0004930	G-protein coupled receptor activity	9	NPY2R	2.14948	0.145944	-1.66667
MF	GO:0035091	phosphatidylinositol binding	4	MITD1	-3.46012	0.16422	-2
MF	GO:0035091	phosphatidylinositol binding	4	PXK	-2.27221	0.16422	-2
MF	GO:0035091	phosphatidylinositol binding	4	NOXO1	-7.10585	0.16422	-2
MF	GO:0035091	phosphatidylinositol binding	4	SNX10	-5.15428	0.16422	-2
BP	GO:0055085	transmembrane transport	8	TAP1	-5.67699	0.170817	-1.41421
BP	GO:0055085	transmembrane transport	8	TAP2	-3.79877	0.170817	-1.41421
BP	GO:0055085	transmembrane transport	8	SLC6A2	3.13383	0.170817	-1.41421
BP	GO:0055085	transmembrane transport	8	GJA1	-3.31272	0.170817	-1.41421
BP	GO:0055085	transmembrane transport	8	GJA3	-3.62828	0.170817	-1.41421
BP	GO:0055085	transmembrane transport	8	SLC2A5	2.35821	0.170817	-1.41421
BP	GO:0055085	transmembrane transport	8	SLC41A2	-3.10712	0.170817	-1.41421
BP	GO:0055085	transmembrane transport	8	SLC46A2	-5.28026	0.170817	-1.41421
BP	GO:0007166	cell surface receptor signaling pathway	7	CD36	2.25228	0.177612	-0.377964
BP	GO:0007166	cell surface receptor signaling pathway	7	CD81	-2.03888	0.177612	-0.377964
BP	GO:0007166	cell surface receptor signaling pathway	7	SCTR	-3.25834	0.177612	-0.377964
BP	GO:0007166	cell surface receptor signaling pathway	7	LOC771308	#NAME?	0.177612	-0.377964
BP	GO:0007166	cell surface receptor signaling pathway	7	TRPA1	3.06345	0.177612	-0.377964
BP	GO:0007166	cell surface receptor signaling pathway	7	CRHR2	-2.17825	0.177612	-0.377964
BP	GO:0007166	cell surface receptor signaling pathway	7	NPY2R	2.14948	0.177612	-0.377964
CC	GO:0043005	neuron projection	6	MAP2	-2.45976	0.180921	0.816497
CC	GO:0043005	neuron projection	6	SLC6A2	3.13383	0.180921	0.816497
CC	GO:0043005	neuron projection	6	GRIN2A	2.56105	0.180921	0.816497
CC	GO:0043005	neuron projection	6	PACRG	2.74222	0.180921	0.816497
CC	GO:0043005	neuron projection	6	KIF5C	-2.48449	0.180921	0.816497
CC	GO:0043005	neuron projection	6	AMPH	4.38554	0.180921	0.816497
MF	GO:0005516	calmodulin binding	4	VAMP2	-4.38357	0.188735	-1
MF	GO:0005516	calmodulin binding	4	MYO1G	-2.31226	0.188735	-1
MF	GO:0005516	calmodulin binding	4	CALD1	-2.71508	0.188735	-1
MF	GO:0005516	calmodulin binding	4	ATP2B2	2.90659	0.188735	-1
CC	GO:0005578	proteinaceous extracellular matrix	8	COL9A3	-3.84996	0.192027	0
CC	GO:0005578	proteinaceous extracellular matrix	8	GPC6	4.50026	0.192027	0
CC	GO:0005578	proteinaceous extracellular matrix	8	LOC101751203	2.22808	0.192027	0
CC	GO:0005578	proteinaceous extracellular matrix	8	ADAMTSL2	-2.09912	0.192027	0
CC	GO:0005578	proteinaceous extracellular matrix	8	CYR61	-2.11968	0.192027	0
CC	GO:0005578	proteinaceous extracellular matrix	8	TNR	2.11372	0.192027	0
CC	GO:0005578	proteinaceous extracellular matrix	8	LOC776271	2.68216	0.192027	0
CC	GO:0005578	proteinaceous extracellular matrix	8	COCH	-3.54428	0.192027	0
MF	GO:0004872	receptor activity	4	SCARB2	2.99583	0.194063	-1
MF	GO:0004872	receptor activity	4	LOC770026	-3.10005	0.194063	-1
MF	GO:0004872	receptor activity	4	TLR3	-3.50239	0.194063	-1
MF	GO:0004872	receptor activity	4	CRTAM	-2.95463	0.194063	-1
MF	GO:0004222	metalloendopeptidase activity	5	LOC101751203	2.22808	0.215031	-1.34164
MF	GO:0004222	metalloendopeptidase activity	5	MMP1	-5.16957	0.215031	-1.34164
MF	GO:0004222	metalloendopeptidase activity	5	MMP7	#NAME?	0.215031	-1.34164
MF	GO:0004222	metalloendopeptidase activity	5	MMP9	-4.4387	0.215031	-1.34164
MF	GO:0004222	metalloendopeptidase activity	5	ADAMTSL2	-2.09912	0.215031	-1.34164
MF	GO:0000981	RNA polymerase II transcription factor activity, sequence-specific DNA binding	6	NFKB2	-2.49807	0.217935	-2.44949
MF	GO:0000981	RNA polymerase II transcription factor activity, sequence-specific DNA binding	6	SPI1	-2.10206	0.217935	-2.44949
MF	GO:0000981	RNA polymerase II transcription factor activity, sequence-specific DNA binding	6	ETV6	-2.00796	0.217935	-2.44949
MF	GO:0000981	RNA polymerase II transcription factor activity, sequence-specific DNA binding	6	ELF3	-7.60725	0.217935	-2.44949
MF	GO:0000981	RNA polymerase II transcription factor activity, sequence-specific DNA binding	6	EHF	-4.37984	0.217935	-2.44949
MF	GO:0000981	RNA polymerase II transcription factor activity, sequence-specific DNA binding	6	JUN	-2.39833	0.217935	-2.44949
MF	GO:0008083	growth factor activity	5	IL6	#NAME?	0.221246	-2.23607
MF	GO:0008083	growth factor activity	5	IL12B	-5.16565	0.221246	-2.23607
MF	GO:0008083	growth factor activity	5	FGF19	-6.94008	0.221246	-2.23607
MF	GO:0008083	growth factor activity	5	CNTF	-2.60902	0.221246	-2.23607
MF	GO:0008083	growth factor activity	5	INHBB	-2.4036	0.221246	-2.23607
BP	GO:0007507	heart development	5	GATA3	-2.7965	0.221246	-2.23607
BP	GO:0007507	heart development	5	LCN8	-6.16581	0.221246	-2.23607
BP	GO:0007507	heart development	5	SMYD1	-4.50532	0.221246	-2.23607
BP	GO:0007507	heart development	5	FGF19	-6.94008	0.221246	-2.23607
BP	GO:0007507	heart development	5	GJA1	-3.31272	0.221246	-2.23607
BP	GO:0045892	negative regulation of transcription, DNA-templated	8	GATA3	-2.7965	0.227069	-2.82843
BP	GO:0045892	negative regulation of transcription, DNA-templated	8	IKZF1	-2.50218	0.227069	-2.82843
BP	GO:0045892	negative regulation of transcription, DNA-templated	8	SMYD1	-4.50532	0.227069	-2.82843
BP	GO:0045892	negative regulation of transcription, DNA-templated	8	ELF3	-7.60725	0.227069	-2.82843
BP	GO:0045892	negative regulation of transcription, DNA-templated	8	IRF1	-5.55004	0.227069	-2.82843
BP	GO:0045892	negative regulation of transcription, DNA-templated	8	CBFA2T2	-2.35192	0.227069	-2.82843
BP	GO:0045892	negative regulation of transcription, DNA-templated	8	CREM	-3.16921	0.227069	-2.82843
BP	GO:0045892	negative regulation of transcription, DNA-templated	8	CAPN3	-2.58869	0.227069	-2.82843
CC	GO:0045211	postsynaptic membrane	4	GRIA3	3.28613	0.228565	1
CC	GO:0045211	postsynaptic membrane	4	GRIA4	6.26307	0.228565	1
CC	GO:0045211	postsynaptic membrane	4	CHRM3	-4.06083	0.228565	1
CC	GO:0045211	postsynaptic membrane	4	GRIN2A	2.56105	0.228565	1
BP	GO:0043547	positive regulation of GTPase activity	14	CCLI10	-4.23727	0.242092	-2.67261
BP	GO:0043547	positive regulation of GTPase activity	14	LOC417536	-6.37823	0.242092	-2.67261
BP	GO:0043547	positive regulation of GTPase activity	14	LOC427201	-3.44468	0.242092	-2.67261
BP	GO:0043547	positive regulation of GTPase activity	14	RASGEF1C	-2.66114	0.242092	-2.67261
BP	GO:0043547	positive regulation of GTPase activity	14	ARHGEF37	-2.69721	0.242092	-2.67261
BP	GO:0043547	positive regulation of GTPase activity	14	AMPH	4.38554	0.242092	-2.67261
BP	GO:0043547	positive regulation of GTPase activity	14	RGS1	-3.06447	0.242092	-2.67261
BP	GO:0043547	positive regulation of GTPase activity	14	RGS8	2.78921	0.242092	-2.67261
BP	GO:0043547	positive regulation of GTPase activity	14	CCL19	-7.00579	0.242092	-2.67261
BP	GO:0043547	positive regulation of GTPase activity	14	HTR2B	-2.24109	0.242092	-2.67261
BP	GO:0043547	positive regulation of GTPase activity	14	RGS16	-5.30408	0.242092	-2.67261
BP	GO:0043547	positive regulation of GTPase activity	14	NET1	-2.67786	0.242092	-2.67261
BP	GO:0043547	positive regulation of GTPase activity	14	CCL4	-8.54195	0.242092	-2.67261
BP	GO:0043547	positive regulation of GTPase activity	14	CX3CL1	-4.35592	0.242092	-2.67261
CC	GO:0005783	endoplasmic reticulum	18	OLFM1	2.39194	0.245434	-0.942809
CC	GO:0005783	endoplasmic reticulum	18	TMEM100	-2.62421	0.245434	-0.942809
CC	GO:0005783	endoplasmic reticulum	18	ATP10B	-5.44992	0.245434	-0.942809
CC	GO:0005783	endoplasmic reticulum	18	VCAM1	-4.32224	0.245434	-0.942809
CC	GO:0005783	endoplasmic reticulum	18	FOS	-3.35279	0.245434	-0.942809
CC	GO:0005783	endoplasmic reticulum	18	PTPN2	-2.56548	0.245434	-0.942809
CC	GO:0005783	endoplasmic reticulum	18	GRIN2A	2.56105	0.245434	-0.942809
CC	GO:0005783	endoplasmic reticulum	18	FNDC4	-4.35429	0.245434	-0.942809
CC	GO:0005783	endoplasmic reticulum	18	STC2	3.0717	0.245434	-0.942809
CC	GO:0005783	endoplasmic reticulum	18	CPED1	2.7231	0.245434	-0.942809
CC	GO:0005783	endoplasmic reticulum	18	LRRTM1	5.65819	0.245434	-0.942809
CC	GO:0005783	endoplasmic reticulum	18	USP25	-2.24815	0.245434	-0.942809
CC	GO:0005783	endoplasmic reticulum	18	SNX10	-5.15428	0.245434	-0.942809
CC	GO:0005783	endoplasmic reticulum	18	CREB3L3	2.05613	0.245434	-0.942809
CC	GO:0005783	endoplasmic reticulum	18	LOC417192	#NAME?	0.245434	-0.942809
CC	GO:0005783	endoplasmic reticulum	18	AGR2	-4.40324	0.245434	-0.942809
CC	GO:0005783	endoplasmic reticulum	18	TSPO2	-3.27258	0.245434	-0.942809
CC	GO:0005783	endoplasmic reticulum	18	ATP2B2	2.90659	0.245434	-0.942809
CC	GO:0030424	axon	5	OLFM1	2.39194	0.246494	-0.447214
CC	GO:0030424	axon	5	NTNG2	-2.66239	0.246494	-0.447214
CC	GO:0030424	axon	5	CNTF	-2.60902	0.246494	-0.447214
CC	GO:0030424	axon	5	LRRTM1	5.65819	0.246494	-0.447214
CC	GO:0030424	axon	5	KCNA3	-4.73581	0.246494	-0.447214
BP	GO:0042127	regulation of cell proliferation	6	LOC422654	#NAME?	0.246494	-2.44949
BP	GO:0042127	regulation of cell proliferation	6	TNFRSF18	-2.32658	0.246494	-2.44949
BP	GO:0042127	regulation of cell proliferation	6	TNFRSF6B	-5.15294	0.246494	-2.44949
BP	GO:0042127	regulation of cell proliferation	6	TNFRSF8	-2.43634	0.246494	-2.44949
BP	GO:0042127	regulation of cell proliferation	6	STYK1	-2.10944	0.246494	-2.44949
BP	GO:0042127	regulation of cell proliferation	6	JUN	-2.39833	0.246494	-2.44949
MF	GO:0004871	signal transducer activity	5	STAT1	-5.75558	0.252347	-2.23607
MF	GO:0004871	signal transducer activity	5	STAT2	-3.77861	0.252347	-2.23607
MF	GO:0004871	signal transducer activity	5	STAT4	-2.14006	0.252347	-2.23607
MF	GO:0004871	signal transducer activity	5	GNGT2	-5.67052	0.252347	-2.23607
MF	GO:0004871	signal transducer activity	5	GNAZ	-2.18994	0.252347	-2.23607
BP	GO:0016477	cell migration	5	PSTPIP1	-2.848	0.272885	-1.34164
BP	GO:0016477	cell migration	5	GPC6	4.50026	0.272885	-1.34164
BP	GO:0016477	cell migration	5	IL12B	-5.16565	0.272885	-1.34164
BP	GO:0016477	cell migration	5	STYK1	-2.10944	0.272885	-1.34164
BP	GO:0016477	cell migration	5	SDC4	-3.66733	0.272885	-1.34164
CC	GO:0009986	cell surface	11	MFI2	2.64662	0.275079	-1.50756
CC	GO:0009986	cell surface	11	CD44	-2.63858	0.275079	-1.50756
CC	GO:0009986	cell surface	11	EPHA2	-2.15599	0.275079	-1.50756
CC	GO:0009986	cell surface	11	LY6E	-2.59267	0.275079	-1.50756
CC	GO:0009986	cell surface	11	THBD	-3.63149	0.275079	-1.50756
CC	GO:0009986	cell surface	11	GRIN2A	2.56105	0.275079	-1.50756
CC	GO:0009986	cell surface	11	KCNE2	3.03334	0.275079	-1.50756
CC	GO:0009986	cell surface	11	SDC4	-3.66733	0.275079	-1.50756
CC	GO:0009986	cell surface	11	SCUBE3	-3.39442	0.275079	-1.50756
CC	GO:0009986	cell surface	11	LIPG	-2.52717	0.275079	-1.50756
CC	GO:0009986	cell surface	11	SLC46A2	-5.28026	0.275079	-1.50756
MF	GO:0008270	zinc ion binding	38	SHH	-2.54731	0.27903	-3.89331
MF	GO:0008270	zinc ion binding	38	GATA3	-2.7965	0.27903	-3.89331
MF	GO:0008270	zinc ion binding	38	RNF144A	2.43718	0.27903	-3.89331
MF	GO:0008270	zinc ion binding	38	IFIH1	-4.94328	0.27903	-3.89331
MF	GO:0008270	zinc ion binding	38	LOC101751203	2.22808	0.27903	-3.89331
MF	GO:0008270	zinc ion binding	38	CA4	-3.25053	0.27903	-3.89331
MF	GO:0008270	zinc ion binding	38	CA9	2.51134	0.27903	-3.89331
MF	GO:0008270	zinc ion binding	38	PML	-3.94926	0.27903	-3.89331
MF	GO:0008270	zinc ion binding	38	TRIM25	-2.23889	0.27903	-3.89331
MF	GO:0008270	zinc ion binding	38	ABLIM2	-2.42801	0.27903	-3.89331
MF	GO:0008270	zinc ion binding	38	SAMHD1	-4.07807	0.27903	-3.89331
MF	GO:0008270	zinc ion binding	38	BIRC2	-3.09022	0.27903	-3.89331
MF	GO:0008270	zinc ion binding	38	ISL2	-5.08127	0.27903	-3.89331
MF	GO:0008270	zinc ion binding	38	MMP1	-5.16957	0.27903	-3.89331
MF	GO:0008270	zinc ion binding	38	MMP7	#NAME?	0.27903	-3.89331
MF	GO:0008270	zinc ion binding	38	MMP9	-4.4387	0.27903	-3.89331
MF	GO:0008270	zinc ion binding	38	ERAP1	-2.51906	0.27903	-3.89331
MF	GO:0008270	zinc ion binding	38	SOD3	-3.963	0.27903	-3.89331
MF	GO:0008270	zinc ion binding	38	LNPEP	-2.23931	0.27903	-3.89331
MF	GO:0008270	zinc ion binding	38	RNF213	-5.30256	0.27903	-3.89331
MF	GO:0008270	zinc ion binding	38	TRIM2	-2.49103	0.27903	-3.89331
MF	GO:0008270	zinc ion binding	38	DTX3L	-3.15845	0.27903	-3.89331
MF	GO:0008270	zinc ion binding	38	CPA6	4.18538	0.27903	-3.89331
MF	GO:0008270	zinc ion binding	38	LOC100857563	-5.76698	0.27903	-3.89331
MF	GO:0008270	zinc ion binding	38	2018-03-03	Inf	0.27903	-3.89331
MF	GO:0008270	zinc ion binding	38	TNFAIP3	-2.22653	0.27903	-3.89331
MF	GO:0008270	zinc ion binding	38	DHX58	-4.13259	0.27903	-3.89331
MF	GO:0008270	zinc ion binding	38	ADAMTSL2	-2.09912	0.27903	-3.89331
MF	GO:0008270	zinc ion binding	38	OTUD7A	-2.09819	0.27903	-3.89331
MF	GO:0008270	zinc ion binding	38	LOC101748113	-3.85047	0.27903	-3.89331
MF	GO:0008270	zinc ion binding	38	LOC770718	-3.64526	0.27903	-3.89331
MF	GO:0008270	zinc ion binding	38	TRHDE	2.13868	0.27903	-3.89331
MF	GO:0008270	zinc ion binding	38	RNF152	2.0537	0.27903	-3.89331
MF	GO:0008270	zinc ion binding	38	ESRRB	-2.71628	0.27903	-3.89331
MF	GO:0008270	zinc ion binding	38	LNX1	-2.15218	0.27903	-3.89331
MF	GO:0008270	zinc ion binding	38	RNF19B	-4.842	0.27903	-3.89331
MF	GO:0008270	zinc ion binding	38	NR4A2	-4.59329	0.27903	-3.89331
MF	GO:0008270	zinc ion binding	38	NR4A3	-3.54991	0.27903	-3.89331
CC	GO:0005768	endosome	5	BDKRB2	#NAME?	0.286426	-0.447214
CC	GO:0005768	endosome	5	2018-03-03	Inf	0.286426	-0.447214
CC	GO:0005768	endosome	5	SNX10	-5.15428	0.286426	-0.447214
CC	GO:0005768	endosome	5	STEAP4	-4.45283	0.286426	-0.447214
CC	GO:0005768	endosome	5	PACSIN1	3.22308	0.286426	-0.447214
BP	GO:0007275	multicellular organism development	8	TNFRSF18	-2.32658	0.288942	-0.707107
BP	GO:0007275	multicellular organism development	8	TNFRSF6B	-5.15294	0.288942	-0.707107
BP	GO:0007275	multicellular organism development	8	SFRP1	2.10803	0.288942	-0.707107
BP	GO:0007275	multicellular organism development	8	LOC101751203	2.22808	0.288942	-0.707107
BP	GO:0007275	multicellular organism development	8	TNFRSF8	-2.43634	0.288942	-0.707107
BP	GO:0007275	multicellular organism development	8	IKZF1	-2.50218	0.288942	-0.707107
BP	GO:0007275	multicellular organism development	8	ISL2	-5.08127	0.288942	-0.707107
BP	GO:0007275	multicellular organism development	8	TLX1	3.43892	0.288942	-0.707107
MF	GO:0005509	calcium ion binding	22	CAPSL	-4.70478	0.293108	-1.70561
MF	GO:0005509	calcium ion binding	22	SHH	-2.54731	0.293108	-1.70561
MF	GO:0005509	calcium ion binding	22	SYT16	2.32277	0.293108	-1.70561
MF	GO:0005509	calcium ion binding	22	PRRG4	-4.20125	0.293108	-1.70561
MF	GO:0005509	calcium ion binding	22	C1R	-2.58096	0.293108	-1.70561
MF	GO:0005509	calcium ion binding	22	C1S	-3.94806	0.293108	-1.70561
MF	GO:0005509	calcium ion binding	22	TC2N	3.47061	0.293108	-1.70561
MF	GO:0005509	calcium ion binding	22	LOC101751203	2.22808	0.293108	-1.70561
MF	GO:0005509	calcium ion binding	22	CDH3	-2.40862	0.293108	-1.70561
MF	GO:0005509	calcium ion binding	22	THBD	-3.63149	0.293108	-1.70561
MF	GO:0005509	calcium ion binding	22	CDH20	-2.05871	0.293108	-1.70561
MF	GO:0005509	calcium ion binding	22	DLL1	-2.19239	0.293108	-1.70561
MF	GO:0005509	calcium ion binding	22	SLC24A4	2.58827	0.293108	-1.70561
MF	GO:0005509	calcium ion binding	22	MMP1	-5.16957	0.293108	-1.70561
MF	GO:0005509	calcium ion binding	22	RYR3	2.21324	0.293108	-1.70561
MF	GO:0005509	calcium ion binding	22	C9ORF58	2.17824	0.293108	-1.70561
MF	GO:0005509	calcium ion binding	22	SCUBE3	-3.39442	0.293108	-1.70561
MF	GO:0005509	calcium ion binding	22	CAMKK2	-2.00058	0.293108	-1.70561
MF	GO:0005509	calcium ion binding	22	PCDH10	-2.46326	0.293108	-1.70561
MF	GO:0005509	calcium ion binding	22	PCDH17	-2.5348	0.293108	-1.70561
MF	GO:0005509	calcium ion binding	22	ATP2B2	2.90659	0.293108	-1.70561
MF	GO:0005509	calcium ion binding	22	CAPN3	-2.58869	0.293108	-1.70561
MF	GO:0019899	enzyme binding	5	STAT1	-5.75558	0.299897	-0.447214
MF	GO:0019899	enzyme binding	5	CBX4	-2.7323	0.299897	-0.447214
MF	GO:0019899	enzyme binding	5	SCARB2	2.99583	0.299897	-0.447214
MF	GO:0019899	enzyme binding	5	NOXO1	-7.10585	0.299897	-0.447214
MF	GO:0019899	enzyme binding	5	STC2	3.0717	0.299897	-0.447214
BP	GO:0006511	ubiquitin-dependent protein catabolic process	4	USP2	2.09314	0.304217	-1
BP	GO:0006511	ubiquitin-dependent protein catabolic process	4	USP18	-7.97466	0.304217	-1
BP	GO:0006511	ubiquitin-dependent protein catabolic process	4	USP25	-2.24815	0.304217	-1
BP	GO:0006511	ubiquitin-dependent protein catabolic process	4	USP35	-2.28026	0.304217	-1
CC	GO:0005622	intracellular	19	NYAP2	3.4877	0.319557	-2.06474
CC	GO:0005622	intracellular	19	RHOV	-4.19084	0.319557	-2.06474
CC	GO:0005622	intracellular	19	STK32B	2.05895	0.319557	-2.06474
CC	GO:0005622	intracellular	19	ANO9	-3.73155	0.319557	-2.06474
CC	GO:0005622	intracellular	19	EPHA2	-2.15599	0.319557	-2.06474
CC	GO:0005622	intracellular	19	ALDH8A1	2.06176	0.319557	-2.06474
CC	GO:0005622	intracellular	19	PML	-3.94926	0.319557	-2.06474
CC	GO:0005622	intracellular	19	LOC427201	-3.44468	0.319557	-2.06474
CC	GO:0005622	intracellular	19	NOXO1	-7.10585	0.319557	-2.06474
CC	GO:0005622	intracellular	19	RASGEF1C	-2.66114	0.319557	-2.06474
CC	GO:0005622	intracellular	19	LOC100857563	-5.76698	0.319557	-2.06474
CC	GO:0005622	intracellular	19	SLC26A6	2.23047	0.319557	-2.06474
CC	GO:0005622	intracellular	19	CCL19	-7.00579	0.319557	-2.06474
CC	GO:0005622	intracellular	19	RND3	-2.45752	0.319557	-2.06474
CC	GO:0005622	intracellular	19	LOC101748113	-3.85047	0.319557	-2.06474
CC	GO:0005622	intracellular	19	LOC770718	-3.64526	0.319557	-2.06474
CC	GO:0005622	intracellular	19	PRKCQ	-3.4783	0.319557	-2.06474
CC	GO:0005622	intracellular	19	RASL12	2.04219	0.319557	-2.06474
CC	GO:0005622	intracellular	19	TIFA	-3.83596	0.319557	-2.06474
MF	GO:0004674	protein serine/threonine kinase activity	9	STK32B	2.05895	0.32363	-2.33333
MF	GO:0004674	protein serine/threonine kinase activity	9	PLK3	-2.0048	0.32363	-2.33333
MF	GO:0004674	protein serine/threonine kinase activity	9	PIM1	-2.83355	0.32363	-2.33333
MF	GO:0004674	protein serine/threonine kinase activity	9	RIPK2	-2.78972	0.32363	-2.33333
MF	GO:0004674	protein serine/threonine kinase activity	9	TRPM6	-4.36657	0.32363	-2.33333
MF	GO:0004674	protein serine/threonine kinase activity	9	ALPK1	-4.09896	0.32363	-2.33333
MF	GO:0004674	protein serine/threonine kinase activity	9	PRKCQ	-3.4783	0.32363	-2.33333
MF	GO:0004674	protein serine/threonine kinase activity	9	SIK1	-2.28075	0.32363	-2.33333
MF	GO:0004674	protein serine/threonine kinase activity	9	CAMKK2	-2.00058	0.32363	-2.33333
CC	GO:0005802	trans-Golgi network	4	VAMP2	-4.38357	0.351617	-1
CC	GO:0005802	trans-Golgi network	4	CA4	-3.25053	0.351617	-1
CC	GO:0005802	trans-Golgi network	4	SOD3	-3.963	0.351617	-1
CC	GO:0005802	trans-Golgi network	4	AMPH	4.38554	0.351617	-1
BP	GO:0071805	potassium ion transmembrane transport	4	KCNA3	-4.73581	0.368055	0
BP	GO:0071805	potassium ion transmembrane transport	4	KCNB2	2.45691	0.368055	0
BP	GO:0071805	potassium ion transmembrane transport	4	KCNC1	4.02755	0.368055	0
BP	GO:0071805	potassium ion transmembrane transport	4	TRPM5	-4.69066	0.368055	0
BP	GO:0008285	negative regulation of cell proliferation	7	CDKN1A	-3.51063	0.373004	-2.64575
BP	GO:0008285	negative regulation of cell proliferation	7	GATA3	-2.7965	0.373004	-2.64575
BP	GO:0008285	negative regulation of cell proliferation	7	PTPN2	-2.56548	0.373004	-2.64575
BP	GO:0008285	negative regulation of cell proliferation	7	DLL1	-2.19239	0.373004	-2.64575
BP	GO:0008285	negative regulation of cell proliferation	7	RASSF5	-2.40516	0.373004	-2.64575
BP	GO:0008285	negative regulation of cell proliferation	7	SERPINE2	-3.29095	0.373004	-2.64575
BP	GO:0008285	negative regulation of cell proliferation	7	IRF1	-5.55004	0.373004	-2.64575
BP	GO:0042787	protein ubiquitination involved in ubiquitin-dependent protein catabolic process	4	RNF144A	2.43718	0.37552	-1
BP	GO:0042787	protein ubiquitination involved in ubiquitin-dependent protein catabolic process	4	TRIM25	-2.23889	0.37552	-1
BP	GO:0042787	protein ubiquitination involved in ubiquitin-dependent protein catabolic process	4	LNX1	-2.15218	0.37552	-1
BP	GO:0042787	protein ubiquitination involved in ubiquitin-dependent protein catabolic process	4	RNF19B	-4.842	0.37552	-1
BP	GO:0046777	protein autophosphorylation	4	KIT	-3.11937	0.37552	-2
BP	GO:0046777	protein autophosphorylation	4	PIM1	-2.83355	0.37552	-2
BP	GO:0046777	protein autophosphorylation	4	EIF2AK2	-3.57317	0.37552	-2
BP	GO:0046777	protein autophosphorylation	4	CAMKK2	-2.00058	0.37552	-2
CC	GO:0043025	neuronal cell body	4	OLFM1	2.39194	0.383787	0
CC	GO:0043025	neuronal cell body	4	P2RX7	-6.33028	0.383787	0
CC	GO:0043025	neuronal cell body	4	RAB17	-4.97044	0.383787	0
CC	GO:0043025	neuronal cell body	4	ATP2B2	2.90659	0.383787	0
MF	GO:0046983	protein dimerization activity	4	MXI1	-2.43816	0.390842	-2
MF	GO:0046983	protein dimerization activity	4	ATP6V1C2	-2.182	0.390842	-2
MF	GO:0046983	protein dimerization activity	4	GATA3	-2.7965	0.390842	-2
MF	GO:0046983	protein dimerization activity	4	ANO9	-3.73155	0.390842	-2
CC	GO:0005874	microtubule	5	LOC423919	-2.14069	0.399099	-2.23607
CC	GO:0005874	microtubule	5	MAP2	-2.45976	0.399099	-2.23607
CC	GO:0005874	microtubule	5	CNP	-3.23783	0.399099	-2.23607
CC	GO:0005874	microtubule	5	SARM1	-2.06739	0.399099	-2.23607
CC	GO:0005874	microtubule	5	KIF5C	-2.48449	0.399099	-2.23607
BP	GO:0030154	cell differentiation	6	SPI1	-2.10206	0.410578	-1.63299
BP	GO:0030154	cell differentiation	6	SFRP1	2.10803	0.410578	-1.63299
BP	GO:0030154	cell differentiation	6	ETV6	-2.00796	0.410578	-1.63299
BP	GO:0030154	cell differentiation	6	ELF3	-7.60725	0.410578	-1.63299
BP	GO:0030154	cell differentiation	6	EHF	-4.37984	0.410578	-1.63299
BP	GO:0030154	cell differentiation	6	STYK1	-2.10944	0.410578	-1.63299
BP	GO:0007155	cell adhesion	5	SPP1	-5.29461	0.419347	-0.447214
BP	GO:0007155	cell adhesion	5	PARVG	-2.33494	0.419347	-0.447214
BP	GO:0007155	cell adhesion	5	CYR61	-2.11968	0.419347	-0.447214
BP	GO:0007155	cell adhesion	5	TNR	2.11372	0.419347	-0.447214
BP	GO:0007155	cell adhesion	5	LOC776271	2.68216	0.419347	-0.447214
CC	GO:0005789	endoplasmic reticulum membrane	8	TAPBP	-2.47178	0.442706	-0.707107
CC	GO:0005789	endoplasmic reticulum membrane	8	TMEM173	-4.34968	0.442706	-0.707107
CC	GO:0005789	endoplasmic reticulum membrane	8	REEP6	2.31993	0.442706	-0.707107
CC	GO:0005789	endoplasmic reticulum membrane	8	FMO4	4.89712	0.442706	-0.707107
CC	GO:0005789	endoplasmic reticulum membrane	8	PIGA	-3.216	0.442706	-0.707107
CC	GO:0005789	endoplasmic reticulum membrane	8	ERAP1	-2.51906	0.442706	-0.707107
CC	GO:0005789	endoplasmic reticulum membrane	8	TM6SF2	2.04104	0.442706	-0.707107
CC	GO:0005789	endoplasmic reticulum membrane	8	RSAD2	-12.0768	0.442706	-0.707107
MF	GO:0042803	protein homodimerization activity	17	C10ORF65	2.013	0.442706	-1.21268
MF	GO:0042803	protein homodimerization activity	17	STAT1	-5.75558	0.442706	-1.21268
MF	GO:0042803	protein homodimerization activity	17	MITD1	-3.46012	0.442706	-1.21268
MF	GO:0042803	protein homodimerization activity	17	SYT16	2.32277	0.442706	-1.21268
MF	GO:0042803	protein homodimerization activity	17	TMEM173	-4.34968	0.442706	-1.21268
MF	GO:0042803	protein homodimerization activity	17	KIT	-3.11937	0.442706	-1.21268
MF	GO:0042803	protein homodimerization activity	17	IL12B	-5.16565	0.442706	-1.21268
MF	GO:0042803	protein homodimerization activity	17	STC2	3.0717	0.442706	-1.21268
MF	GO:0042803	protein homodimerization activity	17	LOC770026	-3.10005	0.442706	-1.21268
MF	GO:0042803	protein homodimerization activity	17	ATF3	-2.49525	0.442706	-1.21268
MF	GO:0042803	protein homodimerization activity	17	GREM2	4.1523	0.442706	-1.21268
MF	GO:0042803	protein homodimerization activity	17	INHBB	-2.4036	0.442706	-1.21268
MF	GO:0042803	protein homodimerization activity	17	TRPM8	2.21558	0.442706	-1.21268
MF	GO:0042803	protein homodimerization activity	17	CALCOCO2	-2.43437	0.442706	-1.21268
MF	GO:0042803	protein homodimerization activity	17	CREB3L3	2.05613	0.442706	-1.21268
MF	GO:0042803	protein homodimerization activity	17	AGR2	-4.40324	0.442706	-1.21268
MF	GO:0042803	protein homodimerization activity	17	CRTAM	-2.95463	0.442706	-1.21268
BP	GO:0006468	protein phosphorylation	10	PLK3	-2.0048	0.447919	-2.52982
BP	GO:0006468	protein phosphorylation	10	P2RX7	-6.33028	0.447919	-2.52982
BP	GO:0006468	protein phosphorylation	10	PXK	-2.27221	0.447919	-2.52982
BP	GO:0006468	protein phosphorylation	10	RIPK2	-2.78972	0.447919	-2.52982
BP	GO:0006468	protein phosphorylation	10	TRPM6	-4.36657	0.447919	-2.52982
BP	GO:0006468	protein phosphorylation	10	MLKL	-7.78266	0.447919	-2.52982
BP	GO:0006468	protein phosphorylation	10	NEK10	3.3748	0.447919	-2.52982
BP	GO:0006468	protein phosphorylation	10	ALPK1	-4.09896	0.447919	-2.52982
BP	GO:0006468	protein phosphorylation	10	SIK1	-2.28075	0.447919	-2.52982
BP	GO:0006468	protein phosphorylation	10	PRKG2	-3.13298	0.447919	-2.52982
BP	GO:0007264	small GTPase mediated signal transduction	7	RHOV	-4.19084	0.466558	-1.13389
BP	GO:0007264	small GTPase mediated signal transduction	7	RAB17	-4.97044	0.466558	-1.13389
BP	GO:0007264	small GTPase mediated signal transduction	7	RAB25	2.2498	0.466558	-1.13389
BP	GO:0007264	small GTPase mediated signal transduction	7	RASGEF1C	-2.66114	0.466558	-1.13389
BP	GO:0007264	small GTPase mediated signal transduction	7	RND3	-2.45752	0.466558	-1.13389
BP	GO:0007264	small GTPase mediated signal transduction	7	RASL12	2.04219	0.466558	-1.13389
BP	GO:0007264	small GTPase mediated signal transduction	7	RASD1	-4.2129	0.466558	-1.13389
MF	GO:0003713	transcription coactivator activity	4	GATA3	-2.7965	0.473847	-2
MF	GO:0003713	transcription coactivator activity	4	ELF3	-7.60725	0.473847	-2
MF	GO:0003713	transcription coactivator activity	4	LPIN1	-3.75606	0.473847	-2
MF	GO:0003713	transcription coactivator activity	4	JUN	-2.39833	0.473847	-2
CC	GO:0031965	nuclear membrane	4	ALOX5	-2.14083	0.489463	-2
CC	GO:0031965	nuclear membrane	4	OSBPL3	-2.55298	0.489463	-2
CC	GO:0031965	nuclear membrane	4	SLC16A3	-2.17496	0.489463	-2
CC	GO:0031965	nuclear membrane	4	FAM188A	-2.34514	0.489463	-2
BP	GO:0006357	regulation of transcription from RNA polymerase II promoter	9	SPI1	-2.10206	0.505244	-3
BP	GO:0006357	regulation of transcription from RNA polymerase II promoter	9	FOS	-3.35279	0.505244	-3
BP	GO:0006357	regulation of transcription from RNA polymerase II promoter	9	NFKBIZ	-3.4581	0.505244	-3
BP	GO:0006357	regulation of transcription from RNA polymerase II promoter	9	RBPJL	-4.96881	0.505244	-3
BP	GO:0006357	regulation of transcription from RNA polymerase II promoter	9	ETV6	-2.00796	0.505244	-3
BP	GO:0006357	regulation of transcription from RNA polymerase II promoter	9	ELF3	-7.60725	0.505244	-3
BP	GO:0006357	regulation of transcription from RNA polymerase II promoter	9	EHF	-4.37984	0.505244	-3
BP	GO:0006357	regulation of transcription from RNA polymerase II promoter	9	FOSL2	-4.56736	0.505244	-3
BP	GO:0006357	regulation of transcription from RNA polymerase II promoter	9	ARID5A	-2.83696	0.505244	-3
MF	GO:0003723	RNA binding	7	MOV10	-3.14097	0.512602	-2.64575
MF	GO:0003723	RNA binding	7	DDX60	-9.49972	0.512602	-2.64575
MF	GO:0003723	RNA binding	7	CELF2	-2.34428	0.512602	-2.64575
MF	GO:0003723	RNA binding	7	IFIT5	-10.606	0.512602	-2.64575
MF	GO:0003723	RNA binding	7	SAMHD1	-4.07807	0.512602	-2.64575
MF	GO:0003723	RNA binding	7	CNP	-3.23783	0.512602	-2.64575
MF	GO:0003723	RNA binding	7	LOC101748113	-3.85047	0.512602	-2.64575
CC	GO:0015629	actin cytoskeleton	4	ABLIM2	-2.42801	0.520046	-2
CC	GO:0015629	actin cytoskeleton	4	MYRIP	-4.68862	0.520046	-2
CC	GO:0015629	actin cytoskeleton	4	SLC16A3	-2.17496	0.520046	-2
CC	GO:0015629	actin cytoskeleton	4	SCNN1D	-2.9164	0.520046	-2
MF	GO:0003700	transcription factor activity, sequence-specific DNA binding	11	NKX2-6	-4.97888	0.522626	-2.7136
MF	GO:0003700	transcription factor activity, sequence-specific DNA binding	11	STAT2	-3.77861	0.522626	-2.7136
MF	GO:0003700	transcription factor activity, sequence-specific DNA binding	11	STAT4	-2.14006	0.522626	-2.7136
MF	GO:0003700	transcription factor activity, sequence-specific DNA binding	11	IKZF1	-2.50218	0.522626	-2.7136
MF	GO:0003700	transcription factor activity, sequence-specific DNA binding	11	EGR1	-2.61645	0.522626	-2.7136
MF	GO:0003700	transcription factor activity, sequence-specific DNA binding	11	PAX9	#NAME?	0.522626	-2.7136
MF	GO:0003700	transcription factor activity, sequence-specific DNA binding	11	IRF8	-2.18182	0.522626	-2.7136
MF	GO:0003700	transcription factor activity, sequence-specific DNA binding	11	CBFA2T2	-2.35192	0.522626	-2.7136
MF	GO:0003700	transcription factor activity, sequence-specific DNA binding	11	CREM	-3.16921	0.522626	-2.7136
MF	GO:0003700	transcription factor activity, sequence-specific DNA binding	11	TBX6	2.16849	0.522626	-2.7136
MF	GO:0003700	transcription factor activity, sequence-specific DNA binding	11	ESRRB	-2.71628	0.522626	-2.7136
MF	GO:0005525	GTP binding	11	RHOV	-4.19084	0.522626	-2.11058
MF	GO:0005525	GTP binding	11	RAB17	-4.97044	0.522626	-2.11058
MF	GO:0005525	GTP binding	11	RAB25	2.2498	0.522626	-2.11058
MF	GO:0005525	GTP binding	11	LOC419563	-5.54316	0.522626	-2.11058
MF	GO:0005525	GTP binding	11	RND3	-2.45752	0.522626	-2.11058
MF	GO:0005525	GTP binding	11	GBP	-3.79259	0.522626	-2.11058
MF	GO:0005525	GTP binding	11	GIMAP1	-2.69415	0.522626	-2.11058
MF	GO:0005525	GTP binding	11	LOC420368	-2.86831	0.522626	-2.11058
MF	GO:0005525	GTP binding	11	RASL12	2.04219	0.522626	-2.11058
MF	GO:0005525	GTP binding	11	GNAZ	-2.18994	0.522626	-2.11058
MF	GO:0005525	GTP binding	11	RASD1	-4.2129	0.522626	-2.11058
CC	GO:0005743	mitochondrial inner membrane	5	GATM	3.37061	0.527914	-0.447214
CC	GO:0005743	mitochondrial inner membrane	5	PRODH	-3.53953	0.527914	-0.447214
CC	GO:0005743	mitochondrial inner membrane	5	CYP11A1	-2.81166	0.527914	-0.447214
CC	GO:0005743	mitochondrial inner membrane	5	SFXN1	2.07087	0.527914	-0.447214
CC	GO:0005743	mitochondrial inner membrane	5	RSAD2	-12.0768	0.527914	-0.447214
MF	GO:0004842	ubiquitin-protein transferase activity	6	RNF213	-5.30256	0.541297	-1.63299
MF	GO:0004842	ubiquitin-protein transferase activity	6	DTX3L	-3.15845	0.541297	-1.63299
MF	GO:0004842	ubiquitin-protein transferase activity	6	KLHL10	-4.70022	0.541297	-1.63299
MF	GO:0004842	ubiquitin-protein transferase activity	6	TNFAIP3	-2.22653	0.541297	-1.63299
MF	GO:0004842	ubiquitin-protein transferase activity	6	RNF152	2.0537	0.541297	-1.63299
MF	GO:0004842	ubiquitin-protein transferase activity	6	LNX1	-2.15218	0.541297	-1.63299
MF	GO:0003924	GTPase activity	5	GNGT2	-5.67052	0.566493	-2.23607
MF	GO:0003924	GTPase activity	5	RAB17	-4.97044	0.566493	-2.23607
MF	GO:0003924	GTPase activity	5	LOC419563	-5.54316	0.566493	-2.23607
MF	GO:0003924	GTPase activity	5	GBP	-3.79259	0.566493	-2.23607
MF	GO:0003924	GTPase activity	5	GNAZ	-2.18994	0.566493	-2.23607
MF	GO:0008134	transcription factor binding	4	NAAA	-2.05371	0.569086	-2
MF	GO:0008134	transcription factor binding	4	PIM1	-2.83355	0.569086	-2
MF	GO:0008134	transcription factor binding	4	JUN	-2.39833	0.569086	-2
MF	GO:0008134	transcription factor binding	4	NBN	-3.12858	0.569086	-2
MF	GO:0046982	protein heterodimerization activity	8	BDKRB2	#NAME?	0.588242	-1.41421
MF	GO:0046982	protein heterodimerization activity	8	SYT16	2.32277	0.588242	-1.41421
MF	GO:0046982	protein heterodimerization activity	8	SPTBN5	-6.71519	0.588242	-1.41421
MF	GO:0046982	protein heterodimerization activity	8	IL12B	-5.16565	0.588242	-1.41421
MF	GO:0046982	protein heterodimerization activity	8	SLC51B	-2.83885	0.588242	-1.41421
MF	GO:0046982	protein heterodimerization activity	8	ATF3	-2.49525	0.588242	-1.41421
MF	GO:0046982	protein heterodimerization activity	8	CREB3L3	2.05613	0.588242	-1.41421
MF	GO:0046982	protein heterodimerization activity	8	NR4A2	-4.59329	0.588242	-1.41421
CC	GO:0070062	extracellular exosome	60	C10ORF65	2.013	0.617707	-2.84019
CC	GO:0070062	extracellular exosome	60	ATP6V1C2	-2.182	0.617707	-2.84019
CC	GO:0070062	extracellular exosome	60	MITD1	-3.46012	0.617707	-2.84019
CC	GO:0070062	extracellular exosome	60	MFI2	2.64662	0.617707	-2.84019
CC	GO:0070062	extracellular exosome	60	SPTBN5	-6.71519	0.617707	-2.84019
CC	GO:0070062	extracellular exosome	60	C1S	-3.94806	0.617707	-2.84019
CC	GO:0070062	extracellular exosome	60	NAAA	-2.05371	0.617707	-2.84019
CC	GO:0070062	extracellular exosome	60	CD44	-2.63858	0.617707	-2.84019
CC	GO:0070062	extracellular exosome	60	AMN	2.00254	0.617707	-2.84019
CC	GO:0070062	extracellular exosome	60	PAH	2.16434	0.617707	-2.84019
CC	GO:0070062	extracellular exosome	60	CD81	-2.03888	0.617707	-2.84019
CC	GO:0070062	extracellular exosome	60	CD86	-3.48059	0.617707	-2.84019
CC	GO:0070062	extracellular exosome	60	ACOT11	2.68605	0.617707	-2.84019
CC	GO:0070062	extracellular exosome	60	VCAM1	-4.32224	0.617707	-2.84019
CC	GO:0070062	extracellular exosome	60	APAF1	-3.12047	0.617707	-2.84019
CC	GO:0070062	extracellular exosome	60	TNFRSF8	-2.43634	0.617707	-2.84019
CC	GO:0070062	extracellular exosome	60	TMPRSS2	2.24667	0.617707	-2.84019
CC	GO:0070062	extracellular exosome	60	ALDH8A1	2.06176	0.617707	-2.84019
CC	GO:0070062	extracellular exosome	60	CA4	-3.25053	0.617707	-2.84019
CC	GO:0070062	extracellular exosome	60	CMTM6	-3.39887	0.617707	-2.84019
CC	GO:0070062	extracellular exosome	60	HAO2	2.7188	0.617707	-2.84019
CC	GO:0070062	extracellular exosome	60	FABP3	-2.01611	0.617707	-2.84019
CC	GO:0070062	extracellular exosome	60	GUCA2B	-2.63037	0.617707	-2.84019
CC	GO:0070062	extracellular exosome	60	CNP	-3.23783	0.617707	-2.84019
CC	GO:0070062	extracellular exosome	60	MYO7B	-4.25785	0.617707	-2.84019
CC	GO:0070062	extracellular exosome	60	MMP7	#NAME?	0.617707	-2.84019
CC	GO:0070062	extracellular exosome	60	MMP9	-4.4387	0.617707	-2.84019
CC	GO:0070062	extracellular exosome	60	SERPINF1	-3.15296	0.617707	-2.84019
CC	GO:0070062	extracellular exosome	60	ERAP1	-2.51906	0.617707	-2.84019
CC	GO:0070062	extracellular exosome	60	SCARB2	2.99583	0.617707	-2.84019
CC	GO:0070062	extracellular exosome	60	SOD3	-3.963	0.617707	-2.84019
CC	GO:0070062	extracellular exosome	60	SLC16A1	2.1543	0.617707	-2.84019
CC	GO:0070062	extracellular exosome	60	RAB17	-4.97044	0.617707	-2.84019
CC	GO:0070062	extracellular exosome	60	RAB25	2.2498	0.617707	-2.84019
CC	GO:0070062	extracellular exosome	60	B2M	-4.65875	0.617707	-2.84019
CC	GO:0070062	extracellular exosome	60	AHSG	2.64631	0.617707	-2.84019
CC	GO:0070062	extracellular exosome	60	C6	-4.21155	0.617707	-2.84019
CC	GO:0070062	extracellular exosome	60	CP	-5.72767	0.617707	-2.84019
CC	GO:0070062	extracellular exosome	60	SLC39A5	2.00976	0.617707	-2.84019
CC	GO:0070062	extracellular exosome	60	C9ORF58	2.17824	0.617707	-2.84019
CC	GO:0070062	extracellular exosome	60	TNFAIP3	-2.22653	0.617707	-2.84019
CC	GO:0070062	extracellular exosome	60	RND3	-2.45752	0.617707	-2.84019
CC	GO:0070062	extracellular exosome	60	GABRB2	3.3302	0.617707	-2.84019
CC	GO:0070062	extracellular exosome	60	SDC4	-3.66733	0.617707	-2.84019
CC	GO:0070062	extracellular exosome	60	SLC6A14	-5.76058	0.617707	-2.84019
CC	GO:0070062	extracellular exosome	60	FAM3B	-3.948	0.617707	-2.84019
CC	GO:0070062	extracellular exosome	60	ARMC3	-3.2034	0.617707	-2.84019
CC	GO:0070062	extracellular exosome	60	TRHDE	2.13868	0.617707	-2.84019
CC	GO:0070062	extracellular exosome	60	TGM4	-5.68984	0.617707	-2.84019
CC	GO:0070062	extracellular exosome	60	LIPA	-2.6001	0.617707	-2.84019
CC	GO:0070062	extracellular exosome	60	PDZK1	2.1177	0.617707	-2.84019
CC	GO:0070062	extracellular exosome	60	LAD1	-2.32748	0.617707	-2.84019
CC	GO:0070062	extracellular exosome	60	BTG2	-2.89452	0.617707	-2.84019
CC	GO:0070062	extracellular exosome	60	DPYS	2.78241	0.617707	-2.84019
CC	GO:0070062	extracellular exosome	60	SERINC2	-2.10545	0.617707	-2.84019
CC	GO:0070062	extracellular exosome	60	GNAZ	-2.18994	0.617707	-2.84019
CC	GO:0070062	extracellular exosome	60	LOC100858751	-2.90125	0.617707	-2.84019
CC	GO:0070062	extracellular exosome	60	COCH	-3.54428	0.617707	-2.84019
CC	GO:0070062	extracellular exosome	60	ATP2B2	2.90659	0.617707	-2.84019
CC	GO:0070062	extracellular exosome	60	STEAP4	-4.45283	0.617707	-2.84019
MF	GO:0019901	protein kinase binding	7	MAP2K6	2.56911	0.627012	-1.88982
MF	GO:0019901	protein kinase binding	7	PTPRR	-2.54644	0.627012	-1.88982
MF	GO:0019901	protein kinase binding	7	SOCS1	-5.51812	0.627012	-1.88982
MF	GO:0019901	protein kinase binding	7	MLKL	-7.78266	0.627012	-1.88982
MF	GO:0019901	protein kinase binding	7	SIK1	-2.28075	0.627012	-1.88982
MF	GO:0019901	protein kinase binding	7	TNIP2	-3.66782	0.627012	-1.88982
MF	GO:0019901	protein kinase binding	7	NR4A3	-3.54991	0.627012	-1.88982
BP	GO:0035556	intracellular signal transduction	9	LOC100858799	-2.16526	0.627476	-1.66667
BP	GO:0035556	intracellular signal transduction	9	STK32B	2.05895	0.627476	-1.66667
BP	GO:0035556	intracellular signal transduction	9	KIT	-3.11937	0.627476	-1.66667
BP	GO:0035556	intracellular signal transduction	9	LOC427201	-3.44468	0.627476	-1.66667
BP	GO:0035556	intracellular signal transduction	9	CISH	-2.46919	0.627476	-1.66667
BP	GO:0035556	intracellular signal transduction	9	NET1	-2.67786	0.627476	-1.66667
BP	GO:0035556	intracellular signal transduction	9	PRKCQ	-3.4783	0.627476	-1.66667
BP	GO:0035556	intracellular signal transduction	9	SIK1	-2.28075	0.627476	-1.66667
BP	GO:0035556	intracellular signal transduction	9	GUCY1A3	2.03916	0.627476	-1.66667
CC	GO:0005737	cytoplasm	85	CAPN6	2.64365	0.679945	-6.39945
CC	GO:0005737	cytoplasm	85	MAP2K6	2.56911	0.679945	-6.39945
CC	GO:0005737	cytoplasm	85	MXI1	-2.43816	0.679945	-6.39945
CC	GO:0005737	cytoplasm	85	GSTT1	2.05052	0.679945	-6.39945
CC	GO:0005737	cytoplasm	85	DDX60	-9.49972	0.679945	-6.39945
CC	GO:0005737	cytoplasm	85	ACSBG2	-4.91354	0.679945	-6.39945
CC	GO:0005737	cytoplasm	85	NMI	-4.28815	0.679945	-6.39945
CC	GO:0005737	cytoplasm	85	STAT2	-3.77861	0.679945	-6.39945
CC	GO:0005737	cytoplasm	85	STAT4	-2.14006	0.679945	-6.39945
CC	GO:0005737	cytoplasm	85	CELF2	-2.34428	0.679945	-6.39945
CC	GO:0005737	cytoplasm	85	MAP2	-2.45976	0.679945	-6.39945
CC	GO:0005737	cytoplasm	85	IFIH1	-4.94328	0.679945	-6.39945
CC	GO:0005737	cytoplasm	85	AVPR1B	#NAME?	0.679945	-6.39945
CC	GO:0005737	cytoplasm	85	ASS1	-2.90896	0.679945	-6.39945
CC	GO:0005737	cytoplasm	85	STRA8	-4.06945	0.679945	-6.39945
CC	GO:0005737	cytoplasm	85	TPH1	-5.94222	0.679945	-6.39945
CC	GO:0005737	cytoplasm	85	NFKBIA	-2.29991	0.679945	-6.39945
CC	GO:0005737	cytoplasm	85	LRRC6	-3.05819	0.679945	-6.39945
CC	GO:0005737	cytoplasm	85	IL12B	-5.16565	0.679945	-6.39945
CC	GO:0005737	cytoplasm	85	CMTR1	-3.8614	0.679945	-6.39945
CC	GO:0005737	cytoplasm	85	PTPRR	-2.54644	0.679945	-6.39945
CC	GO:0005737	cytoplasm	85	TRIM25	-2.23889	0.679945	-6.39945
CC	GO:0005737	cytoplasm	85	FABP1	-4.2027	0.679945	-6.39945
CC	GO:0005737	cytoplasm	85	PXK	-2.27221	0.679945	-6.39945
CC	GO:0005737	cytoplasm	85	SERPINB2	-3.10815	0.679945	-6.39945
CC	GO:0005737	cytoplasm	85	CNP	-3.23783	0.679945	-6.39945
CC	GO:0005737	cytoplasm	85	KRT20	-6.01893	0.679945	-6.39945
CC	GO:0005737	cytoplasm	85	PIM1	-2.83355	0.679945	-6.39945
CC	GO:0005737	cytoplasm	85	SMYD1	-4.50532	0.679945	-6.39945
CC	GO:0005737	cytoplasm	85	RCAN2	2.02322	0.679945	-6.39945
CC	GO:0005737	cytoplasm	85	MFAP3L	2.49652	0.679945	-6.39945
CC	GO:0005737	cytoplasm	85	RIPK2	-2.78972	0.679945	-6.39945
CC	GO:0005737	cytoplasm	85	SOD3	-3.963	0.679945	-6.39945
CC	GO:0005737	cytoplasm	85	CISH	-2.46919	0.679945	-6.39945
CC	GO:0005737	cytoplasm	85	OASL	-10.5761	0.679945	-6.39945
CC	GO:0005737	cytoplasm	85	LNPEP	-2.23931	0.679945	-6.39945
CC	GO:0005737	cytoplasm	85	ETV6	-2.00796	0.679945	-6.39945
CC	GO:0005737	cytoplasm	85	STC1	-2.72918	0.679945	-6.39945
CC	GO:0005737	cytoplasm	85	HMGCS1	-4.55133	0.679945	-6.39945
CC	GO:0005737	cytoplasm	85	SERPINB10	-5.18929	0.679945	-6.39945
CC	GO:0005737	cytoplasm	85	SOCS1	-5.51812	0.679945	-6.39945
CC	GO:0005737	cytoplasm	85	SOCS3	-6.8782	0.679945	-6.39945
CC	GO:0005737	cytoplasm	85	TRIM2	-2.49103	0.679945	-6.39945
CC	GO:0005737	cytoplasm	85	CNTF	-2.60902	0.679945	-6.39945
CC	GO:0005737	cytoplasm	85	DTX3L	-3.15845	0.679945	-6.39945
CC	GO:0005737	cytoplasm	85	KIF5C	-2.48449	0.679945	-6.39945
CC	GO:0005737	cytoplasm	85	LRRTM1	5.65819	0.679945	-6.39945
CC	GO:0005737	cytoplasm	85	PAK6	2.82421	0.679945	-6.39945
CC	GO:0005737	cytoplasm	85	PAK7	-2.08354	0.679945	-6.39945
CC	GO:0005737	cytoplasm	85	EGR1	-2.61645	0.679945	-6.39945
CC	GO:0005737	cytoplasm	85	ARHGEF37	-2.69721	0.679945	-6.39945
CC	GO:0005737	cytoplasm	85	AMPH	4.38554	0.679945	-6.39945
CC	GO:0005737	cytoplasm	85	RGS1	-3.06447	0.679945	-6.39945
CC	GO:0005737	cytoplasm	85	RGS8	2.78921	0.679945	-6.39945
CC	GO:0005737	cytoplasm	85	MAP3K8	-6.41874	0.679945	-6.39945
CC	GO:0005737	cytoplasm	85	KLHL10	-4.70022	0.679945	-6.39945
CC	GO:0005737	cytoplasm	85	TNFAIP3	-2.22653	0.679945	-6.39945
CC	GO:0005737	cytoplasm	85	SLBP	-3.80902	0.679945	-6.39945
CC	GO:0005737	cytoplasm	85	HTR2B	-2.24109	0.679945	-6.39945
CC	GO:0005737	cytoplasm	85	DHX58	-4.13259	0.679945	-6.39945
CC	GO:0005737	cytoplasm	85	MYD88	-2.49259	0.679945	-6.39945
CC	GO:0005737	cytoplasm	85	LOC100859853	-3.60999	0.679945	-6.39945
CC	GO:0005737	cytoplasm	85	RGS16	-5.30408	0.679945	-6.39945
CC	GO:0005737	cytoplasm	85	IRF1	-5.55004	0.679945	-6.39945
CC	GO:0005737	cytoplasm	85	OTUD7A	-2.09819	0.679945	-6.39945
CC	GO:0005737	cytoplasm	85	PTGFR	-4.34224	0.679945	-6.39945
CC	GO:0005737	cytoplasm	85	NEU2	-3.76766	0.679945	-6.39945
CC	GO:0005737	cytoplasm	85	ADCY2	-2.7144	0.679945	-6.39945
CC	GO:0005737	cytoplasm	85	MLKL	-7.78266	0.679945	-6.39945
CC	GO:0005737	cytoplasm	85	CHIA	-3.33622	0.679945	-6.39945
CC	GO:0005737	cytoplasm	85	INDOL1	4.18359	0.679945	-6.39945
CC	GO:0005737	cytoplasm	85	ARMC3	-3.2034	0.679945	-6.39945
[truncated: 330 more rows]

## Sheet: CH VS CH60
category	ID	term	count	genes	logFC	adj_pval	zscore
BP	GO:0006954	inflammatory response	21	BDKRB1	-2.83935	4.10073e-09	-4.58258
BP	GO:0006954	inflammatory response	21	LOC422654	-4.3787	4.10073e-09	-4.58258
BP	GO:0006954	inflammatory response	21	NFKB2	-2.33242	4.10073e-09	-4.58258
BP	GO:0006954	inflammatory response	21	TNFRSF18	-2.24402	4.10073e-09	-4.58258
BP	GO:0006954	inflammatory response	21	TNFRSF6B	-3.91511	4.10073e-09	-4.58258
BP	GO:0006954	inflammatory response	21	LCN8	-4.06676	4.10073e-09	-4.58258
BP	GO:0006954	inflammatory response	21	CCLI10	-3.31282	4.10073e-09	-4.58258
BP	GO:0006954	inflammatory response	21	KIT	-2.36783	4.10073e-09	-4.58258
BP	GO:0006954	inflammatory response	21	TNFRSF8	-2.33371	4.10073e-09	-4.58258
BP	GO:0006954	inflammatory response	21	NFKBIZ	-2.97043	4.10073e-09	-4.58258
BP	GO:0006954	inflammatory response	21	LOC417536	-3.50486	4.10073e-09	-4.58258
BP	GO:0006954	inflammatory response	21	P2RX7	-6.05153	4.10073e-09	-4.58258
BP	GO:0006954	inflammatory response	21	PXK	-2.11867	4.10073e-09	-4.58258
BP	GO:0006954	inflammatory response	21	ELF3	-4.60577	4.10073e-09	-4.58258
BP	GO:0006954	inflammatory response	21	CCL19	-6.60982	4.10073e-09	-4.58258
BP	GO:0006954	inflammatory response	21	PTGFR	-2.80744	4.10073e-09	-4.58258
BP	GO:0006954	inflammatory response	21	CCL4	-6.256	4.10073e-09	-4.58258
BP	GO:0006954	inflammatory response	21	LIPA	-2.31942	4.10073e-09	-4.58258
BP	GO:0006954	inflammatory response	21	CX3CL1	-3.03509	4.10073e-09	-4.58258
BP	GO:0006954	inflammatory response	21	IL10	-7.46289	4.10073e-09	-4.58258
BP	GO:0006954	inflammatory response	21	IL18	-2.79051	4.10073e-09	-4.58258
BP	GO:0051607	defense response to virus	13	IL6	#NAME?	2.95912e-08	-3.60555
BP	GO:0051607	defense response to virus	13	DDX60	-5.53721	2.95912e-08	-3.60555
BP	GO:0051607	defense response to virus	13	TMEM173	-3.69815	2.95912e-08	-3.60555
BP	GO:0051607	defense response to virus	13	CD86	-3.00816	2.95912e-08	-3.60555
BP	GO:0051607	defense response to virus	13	IFIT5	-4.89062	2.95912e-08	-3.60555
BP	GO:0051607	defense response to virus	13	NLRC5	-3.04807	2.95912e-08	-3.60555
BP	GO:0051607	defense response to virus	13	IL12B	-4.75667	2.95912e-08	-3.60555
BP	GO:0051607	defense response to virus	13	SAMHD1	-3.57606	2.95912e-08	-3.60555
BP	GO:0051607	defense response to virus	13	OASL	-4.24924	2.95912e-08	-3.60555
BP	GO:0051607	defense response to virus	13	IFNB	#NAME?	2.95912e-08	-3.60555
BP	GO:0051607	defense response to virus	13	IRF1	-2.42864	2.95912e-08	-3.60555
BP	GO:0051607	defense response to virus	13	RSAD2	-4.97068	2.95912e-08	-3.60555
BP	GO:0051607	defense response to virus	13	TLR3	-2.82016	2.95912e-08	-3.60555
BP	GO:0071222	cellular response to lipopolysaccharide	10	IL6	#NAME?	7.43794e-07	-3.16228
BP	GO:0071222	cellular response to lipopolysaccharide	10	CD86	-3.00816	7.43794e-07	-3.16228
BP	GO:0071222	cellular response to lipopolysaccharide	10	IL12B	-4.75667	7.43794e-07	-3.16228
BP	GO:0071222	cellular response to lipopolysaccharide	10	B2M	-4.26241	7.43794e-07	-3.16228
BP	GO:0071222	cellular response to lipopolysaccharide	10	CMPK2	-3.76962	7.43794e-07	-3.16228
BP	GO:0071222	cellular response to lipopolysaccharide	10	PDE4B	-2.20938	7.43794e-07	-3.16228
BP	GO:0071222	cellular response to lipopolysaccharide	10	TNIP2	-3.6593	7.43794e-07	-3.16228
BP	GO:0071222	cellular response to lipopolysaccharide	10	TNIP3	-5.69475	7.43794e-07	-3.16228
BP	GO:0071222	cellular response to lipopolysaccharide	10	IL10	-7.46289	7.43794e-07	-3.16228
BP	GO:0071222	cellular response to lipopolysaccharide	10	IL18	-2.79051	7.43794e-07	-3.16228
BP	GO:0019221	cytokine-mediated signaling pathway	14	IL10RA	-2.91052	2.87822e-06	-1.60357
BP	GO:0019221	cytokine-mediated signaling pathway	14	IL12B	-4.75667	2.87822e-06	-1.60357
BP	GO:0019221	cytokine-mediated signaling pathway	14	SOCS1	-4.33819	2.87822e-06	-1.60357
BP	GO:0019221	cytokine-mediated signaling pathway	14	SOCS3	-2.24837	2.87822e-06	-1.60357
BP	GO:0019221	cytokine-mediated signaling pathway	14	IL18RAP	-6.03792	2.87822e-06	-1.60357
BP	GO:0019221	cytokine-mediated signaling pathway	14	IL22RA2	-3.05037	2.87822e-06	-1.60357
BP	GO:0019221	cytokine-mediated signaling pathway	14	IFNB	#NAME?	2.87822e-06	-1.60357
BP	GO:0019221	cytokine-mediated signaling pathway	14	LRRTM1	5.60919	2.87822e-06	-1.60357
BP	GO:0019221	cytokine-mediated signaling pathway	14	LRRTM4	2.23677	2.87822e-06	-1.60357
BP	GO:0019221	cytokine-mediated signaling pathway	14	IL1R2	-5.42606	2.87822e-06	-1.60357
BP	GO:0019221	cytokine-mediated signaling pathway	14	GREM2	3.36622	2.87822e-06	-1.60357
BP	GO:0019221	cytokine-mediated signaling pathway	14	RTN4R	2.57364	2.87822e-06	-1.60357
BP	GO:0019221	cytokine-mediated signaling pathway	14	IL4R	-2.03605	2.87822e-06	-1.60357
BP	GO:0019221	cytokine-mediated signaling pathway	14	IL7R	-3.78836	2.87822e-06	-1.60357
MF	GO:0048020	CCR chemokine receptor binding	5	CCLI10	-3.31282	2.98429e-06	-2.23607
MF	GO:0048020	CCR chemokine receptor binding	5	LOC417536	-3.50486	2.98429e-06	-2.23607
MF	GO:0048020	CCR chemokine receptor binding	5	CCL19	-6.60982	2.98429e-06	-2.23607
MF	GO:0048020	CCR chemokine receptor binding	5	CCL4	-6.256	2.98429e-06	-2.23607
MF	GO:0048020	CCR chemokine receptor binding	5	CX3CL1	-3.03509	2.98429e-06	-2.23607
CC	GO:0005615	extracellular space	47	OLFM1	2.35656	7.62268e-06	-3.06316
CC	GO:0005615	extracellular space	47	IL6	#NAME?	7.62268e-06	-3.06316
CC	GO:0005615	extracellular space	47	CETP	4.47147	7.62268e-06	-3.06316
CC	GO:0005615	extracellular space	47	LOC422654	-4.3787	7.62268e-06	-3.06316
CC	GO:0005615	extracellular space	47	SHH	-2.39584	7.62268e-06	-3.06316
CC	GO:0005615	extracellular space	47	LOC417848	Inf	7.62268e-06	-3.06316
CC	GO:0005615	extracellular space	47	MFI2	2.37922	7.62268e-06	-3.06316
CC	GO:0005615	extracellular space	47	CTSS	-2.56664	7.62268e-06	-3.06316
CC	GO:0005615	extracellular space	47	C1QTNF6	-2.59243	7.62268e-06	-3.06316
CC	GO:0005615	extracellular space	47	SPP1	-5.08407	7.62268e-06	-3.06316
CC	GO:0005615	extracellular space	47	LCN8	-4.06676	7.62268e-06	-3.06316
CC	GO:0005615	extracellular space	47	WNT11	2.36984	7.62268e-06	-3.06316
CC	GO:0005615	extracellular space	47	CCLI10	-3.31282	7.62268e-06	-3.06316
CC	GO:0005615	extracellular space	47	PTX3	-3.01406	7.62268e-06	-3.06316
CC	GO:0005615	extracellular space	47	KIT	-2.36783	7.62268e-06	-3.06316
CC	GO:0005615	extracellular space	47	VCAM1	-4.20527	7.62268e-06	-3.06316
CC	GO:0005615	extracellular space	47	GKN2	4.00016	7.62268e-06	-3.06316
CC	GO:0005615	extracellular space	47	LOC417536	-3.50486	7.62268e-06	-3.06316
CC	GO:0005615	extracellular space	47	LECT2	-3.82852	7.62268e-06	-3.06316
CC	GO:0005615	extracellular space	47	SERPINA3	-5.48032	7.62268e-06	-3.06316
CC	GO:0005615	extracellular space	47	SERPINB2	-2.83829	7.62268e-06	-3.06316
CC	GO:0005615	extracellular space	47	CNP	-3.19224	7.62268e-06	-3.06316
CC	GO:0005615	extracellular space	47	SERPINE2	-2.72776	7.62268e-06	-3.06316
CC	GO:0005615	extracellular space	47	MMP9	-2.86703	7.62268e-06	-3.06316
CC	GO:0005615	extracellular space	47	SERPINF1	-2.24283	7.62268e-06	-3.06316
CC	GO:0005615	extracellular space	47	ERAP1	-2.60306	7.62268e-06	-3.06316
CC	GO:0005615	extracellular space	47	PCSK4	2.1832	7.62268e-06	-3.06316
CC	GO:0005615	extracellular space	47	SELE	-5.6244	7.62268e-06	-3.06316
CC	GO:0005615	extracellular space	47	SOD3	-3.89706	7.62268e-06	-3.06316
CC	GO:0005615	extracellular space	47	STC1	-3.20513	7.62268e-06	-3.06316
CC	GO:0005615	extracellular space	47	STC2	2.79658	7.62268e-06	-3.06316
CC	GO:0005615	extracellular space	47	SERPINB10	-4.81724	7.62268e-06	-3.06316
CC	GO:0005615	extracellular space	47	IFNB	#NAME?	7.62268e-06	-3.06316
CC	GO:0005615	extracellular space	47	B2M	-4.26241	7.62268e-06	-3.06316
CC	GO:0005615	extracellular space	47	CCL19	-6.60982	7.62268e-06	-3.06316
CC	GO:0005615	extracellular space	47	OGN	2.07332	7.62268e-06	-3.06316
CC	GO:0005615	extracellular space	47	GREM2	3.36622	7.62268e-06	-3.06316
CC	GO:0005615	extracellular space	47	CCL4	-6.256	7.62268e-06	-3.06316
CC	GO:0005615	extracellular space	47	DKK2	2.7704	7.62268e-06	-3.06316
CC	GO:0005615	extracellular space	47	EFEMP1	2.19646	7.62268e-06	-3.06316
CC	GO:0005615	extracellular space	47	LIPG	-2.72365	7.62268e-06	-3.06316
CC	GO:0005615	extracellular space	47	CX3CL1	-3.03509	7.62268e-06	-3.06316
CC	GO:0005615	extracellular space	47	IL10	-7.46289	7.62268e-06	-3.06316
CC	GO:0005615	extracellular space	47	IL18	-2.79051	7.62268e-06	-3.06316
CC	GO:0005615	extracellular space	47	A2ML4	-2.56514	7.62268e-06	-3.06316
CC	GO:0005615	extracellular space	47	IL34	-2.71884	7.62268e-06	-3.06316
CC	GO:0005615	extracellular space	47	NDP	4.26364	7.62268e-06	-3.06316
MF	GO:0008009	chemokine activity	6	LOC422654	-4.3787	7.92511e-06	-2.44949
MF	GO:0008009	chemokine activity	6	CCLI10	-3.31282	7.92511e-06	-2.44949
MF	GO:0008009	chemokine activity	6	LOC417536	-3.50486	7.92511e-06	-2.44949
MF	GO:0008009	chemokine activity	6	CCL19	-6.60982	7.92511e-06	-2.44949
MF	GO:0008009	chemokine activity	6	CCL4	-6.256	7.92511e-06	-2.44949
MF	GO:0008009	chemokine activity	6	CX3CL1	-3.03509	7.92511e-06	-2.44949
BP	GO:0001916	positive regulation of T cell mediated cytotoxicity	4	TAP2	-3.08418	8.98597e-06	-2
BP	GO:0001916	positive regulation of T cell mediated cytotoxicity	4	P2RX7	-6.05153	8.98597e-06	-2
BP	GO:0001916	positive regulation of T cell mediated cytotoxicity	4	IL12B	-4.75667	8.98597e-06	-2
BP	GO:0001916	positive regulation of T cell mediated cytotoxicity	4	B2M	-4.26241	8.98597e-06	-2
CC	GO:0031012	extracellular matrix	12	SPP1	-5.08407	9.96423e-06	-1.73205
CC	GO:0031012	extracellular matrix	12	SERPINE2	-2.72776	9.96423e-06	-1.73205
CC	GO:0031012	extracellular matrix	12	MMP1	-4.87111	9.96423e-06	-1.73205
CC	GO:0031012	extracellular matrix	12	MMP7	#NAME?	9.96423e-06	-1.73205
CC	GO:0031012	extracellular matrix	12	MMP9	-2.86703	9.96423e-06	-1.73205
CC	GO:0031012	extracellular matrix	12	SERPINF1	-2.24283	9.96423e-06	-1.73205
CC	GO:0031012	extracellular matrix	12	SOD3	-3.89706	9.96423e-06	-1.73205
CC	GO:0031012	extracellular matrix	12	AHSG	2.11965	9.96423e-06	-1.73205
CC	GO:0031012	extracellular matrix	12	TGM4	-4.52921	9.96423e-06	-1.73205
CC	GO:0031012	extracellular matrix	12	EFEMP1	2.19646	9.96423e-06	-1.73205
CC	GO:0031012	extracellular matrix	12	COCH	-3.24197	9.96423e-06	-1.73205
CC	GO:0031012	extracellular matrix	12	NDP	4.26364	9.96423e-06	-1.73205
BP	GO:0048247	lymphocyte chemotaxis	5	CCLI10	-3.31282	1.21196e-05	-2.23607
BP	GO:0048247	lymphocyte chemotaxis	5	LOC417536	-3.50486	1.21196e-05	-2.23607
BP	GO:0048247	lymphocyte chemotaxis	5	CCL19	-6.60982	1.21196e-05	-2.23607
BP	GO:0048247	lymphocyte chemotaxis	5	CCL4	-6.256	1.21196e-05	-2.23607
BP	GO:0048247	lymphocyte chemotaxis	5	CX3CL1	-3.03509	1.21196e-05	-2.23607
BP	GO:0071346	cellular response to interferon-gamma	6	CCLI10	-3.31282	1.89353e-05	-2.44949
BP	GO:0071346	cellular response to interferon-gamma	6	LOC417536	-3.50486	1.89353e-05	-2.44949
BP	GO:0071346	cellular response to interferon-gamma	6	IL12B	-4.75667	1.89353e-05	-2.44949
BP	GO:0071346	cellular response to interferon-gamma	6	CCL19	-6.60982	1.89353e-05	-2.44949
BP	GO:0071346	cellular response to interferon-gamma	6	CCL4	-6.256	1.89353e-05	-2.44949
BP	GO:0071346	cellular response to interferon-gamma	6	CX3CL1	-3.03509	1.89353e-05	-2.44949
CC	GO:0030016	myofibril	5	MYH1B	4.18657	3.66511e-05	-0.447214
CC	GO:0030016	myofibril	5	CALD1	-2.39864	3.66511e-05	-0.447214
CC	GO:0030016	myofibril	5	NRAP	-2.67988	3.66511e-05	-0.447214
CC	GO:0030016	myofibril	5	MYL2	5.15503	3.66511e-05	-0.447214
CC	GO:0030016	myofibril	5	CAPN3	-3.28417	3.66511e-05	-0.447214
CC	GO:0005887	integral component of plasma membrane	45	IFITM5	-2.80888	4.68046e-05	-1.93793
CC	GO:0005887	integral component of plasma membrane	45	GPR34	2.48252	4.68046e-05	-1.93793
CC	GO:0005887	integral component of plasma membrane	45	TNFRSF18	-2.24402	4.68046e-05	-1.93793
CC	GO:0005887	integral component of plasma membrane	45	LOC415713	2.40097	4.68046e-05	-1.93793
CC	GO:0005887	integral component of plasma membrane	45	SLC2A12	2.36402	4.68046e-05	-1.93793
CC	GO:0005887	integral component of plasma membrane	45	C1QTNF6	-2.59243	4.68046e-05	-1.93793
CC	GO:0005887	integral component of plasma membrane	45	TNFRSF6B	-3.91511	4.68046e-05	-1.93793
CC	GO:0005887	integral component of plasma membrane	45	AVPR1B	-6.71116	4.68046e-05	-1.93793
CC	GO:0005887	integral component of plasma membrane	45	TNFRSF8	-2.33371	4.68046e-05	-1.93793
CC	GO:0005887	integral component of plasma membrane	45	SLC6A1	3.75829	4.68046e-05	-1.93793
CC	GO:0005887	integral component of plasma membrane	45	SLC6A2	3.16617	4.68046e-05	-1.93793
CC	GO:0005887	integral component of plasma membrane	45	P2RY14	-2.22833	4.68046e-05	-1.93793
CC	GO:0005887	integral component of plasma membrane	45	CHRM3	-2.86636	4.68046e-05	-1.93793
CC	GO:0005887	integral component of plasma membrane	45	P2RX2	-2.77352	4.68046e-05	-1.93793
CC	GO:0005887	integral component of plasma membrane	45	P2RX7	-6.05153	4.68046e-05	-1.93793
CC	GO:0005887	integral component of plasma membrane	45	THBD	-2.86384	4.68046e-05	-1.93793
CC	GO:0005887	integral component of plasma membrane	45	SLC16A6	-3.09307	4.68046e-05	-1.93793
CC	GO:0005887	integral component of plasma membrane	45	GRM7	3.2195	4.68046e-05	-1.93793
CC	GO:0005887	integral component of plasma membrane	45	SLC22A16	2.48988	4.68046e-05	-1.93793
CC	GO:0005887	integral component of plasma membrane	45	BEST4	-3.54359	4.68046e-05	-1.93793
CC	GO:0005887	integral component of plasma membrane	45	LOC770026	-2.12448	4.68046e-05	-1.93793
CC	GO:0005887	integral component of plasma membrane	45	GLRA4	4.42127	4.68046e-05	-1.93793
CC	GO:0005887	integral component of plasma membrane	45	SLC26A3	-6.99625	4.68046e-05	-1.93793
CC	GO:0005887	integral component of plasma membrane	45	KCNH5	2.58838	4.68046e-05	-1.93793
CC	GO:0005887	integral component of plasma membrane	45	SLC13A5	-2.64692	4.68046e-05	-1.93793
CC	GO:0005887	integral component of plasma membrane	45	KCNJ5	-2.00635	4.68046e-05	-1.93793
CC	GO:0005887	integral component of plasma membrane	45	SLCO2A1	-2.61855	4.68046e-05	-1.93793
CC	GO:0005887	integral component of plasma membrane	45	ATP13A5	-5.26668	4.68046e-05	-1.93793
CC	GO:0005887	integral component of plasma membrane	45	RTN4R	2.57364	4.68046e-05	-1.93793
CC	GO:0005887	integral component of plasma membrane	45	PTGFR	-2.80744	4.68046e-05	-1.93793
CC	GO:0005887	integral component of plasma membrane	45	SLC6A14	-4.57042	4.68046e-05	-1.93793
CC	GO:0005887	integral component of plasma membrane	45	SLC6A15	2.11551	4.68046e-05	-1.93793
CC	GO:0005887	integral component of plasma membrane	45	KCNJ15	-2.5118	4.68046e-05	-1.93793
CC	GO:0005887	integral component of plasma membrane	45	LOC101752158	-3.94264	4.68046e-05	-1.93793
CC	GO:0005887	integral component of plasma membrane	45	SLC10A4	-3.5566	4.68046e-05	-1.93793
CC	GO:0005887	integral component of plasma membrane	45	SLC2A6	-2.64815	4.68046e-05	-1.93793
CC	GO:0005887	integral component of plasma membrane	45	PPAPDC1A	2.28046	4.68046e-05	-1.93793
CC	GO:0005887	integral component of plasma membrane	45	SLCO4C1	-7.05031	4.68046e-05	-1.93793
CC	GO:0005887	integral component of plasma membrane	45	TLR3	-2.82016	4.68046e-05	-1.93793
CC	GO:0005887	integral component of plasma membrane	45	SLC7A10	3.21859	4.68046e-05	-1.93793
CC	GO:0005887	integral component of plasma membrane	45	CRTAM	-2.73916	4.68046e-05	-1.93793
CC	GO:0005887	integral component of plasma membrane	45	DRD3	3.16151	4.68046e-05	-1.93793
CC	GO:0005887	integral component of plasma membrane	45	ATP2B2	2.63562	4.68046e-05	-1.93793
CC	GO:0005887	integral component of plasma membrane	45	STEAP4	-4.06424	4.68046e-05	-1.93793
CC	GO:0005887	integral component of plasma membrane	45	AQP3	2.61133	4.68046e-05	-1.93793
BP	GO:0002548	monocyte chemotaxis	5	CCLI10	-3.31282	9.13098e-05	-2.23607
BP	GO:0002548	monocyte chemotaxis	5	LOC417536	-3.50486	9.13098e-05	-2.23607
BP	GO:0002548	monocyte chemotaxis	5	CCL19	-6.60982	9.13098e-05	-2.23607
BP	GO:0002548	monocyte chemotaxis	5	CCL4	-6.256	9.13098e-05	-2.23607
BP	GO:0002548	monocyte chemotaxis	5	CX3CL1	-3.03509	9.13098e-05	-2.23607
BP	GO:0071347	cellular response to interleukin-1	6	IL6	#NAME?	0.000109852	-2.44949
BP	GO:0071347	cellular response to interleukin-1	6	CCLI10	-3.31282	0.000109852	-2.44949
BP	GO:0071347	cellular response to interleukin-1	6	LOC417536	-3.50486	0.000109852	-2.44949
BP	GO:0071347	cellular response to interleukin-1	6	CCL19	-6.60982	0.000109852	-2.44949
BP	GO:0071347	cellular response to interleukin-1	6	CCL4	-6.256	0.000109852	-2.44949
BP	GO:0071347	cellular response to interleukin-1	6	CX3CL1	-3.03509	0.000109852	-2.44949
BP	GO:0070098	chemokine-mediated signaling pathway	7	LOC422654	-4.3787	0.000118135	-2.64575
BP	GO:0070098	chemokine-mediated signaling pathway	7	CCLI10	-3.31282	0.000118135	-2.64575
BP	GO:0070098	chemokine-mediated signaling pathway	7	LOC417536	-3.50486	0.000118135	-2.64575
BP	GO:0070098	chemokine-mediated signaling pathway	7	ACKR4	-2.36693	0.000118135	-2.64575
BP	GO:0070098	chemokine-mediated signaling pathway	7	CCL19	-6.60982	0.000118135	-2.64575
BP	GO:0070098	chemokine-mediated signaling pathway	7	CCL4	-6.256	0.000118135	-2.64575
BP	GO:0070098	chemokine-mediated signaling pathway	7	CX3CL1	-3.03509	0.000118135	-2.64575
BP	GO:0030593	neutrophil chemotaxis	6	CCLI10	-3.31282	0.000403549	-2.44949
BP	GO:0030593	neutrophil chemotaxis	6	LOC417536	-3.50486	0.000403549	-2.44949
BP	GO:0030593	neutrophil chemotaxis	6	CCL19	-6.60982	0.000403549	-2.44949
BP	GO:0030593	neutrophil chemotaxis	6	CCL4	-6.256	0.000403549	-2.44949
BP	GO:0030593	neutrophil chemotaxis	6	CX3CL1	-3.03509	0.000403549	-2.44949
BP	GO:0030593	neutrophil chemotaxis	6	PDE4B	-2.20938	0.000403549	-2.44949
BP	GO:0042832	defense response to protozoan	4	IL6	#NAME?	0.000421871	-2
BP	GO:0042832	defense response to protozoan	4	IL12B	-4.75667	0.000421871	-2
BP	GO:0042832	defense response to protozoan	4	IL10	-7.46289	0.000421871	-2
BP	GO:0042832	defense response to protozoan	4	IL4R	-2.03605	0.000421871	-2
MF	GO:0000982	transcription factor activity, RNA polymerase II core promoter proximal region sequence-specific binding	4	FOS	-2.40977	0.000421871	-2
MF	GO:0000982	transcription factor activity, RNA polymerase II core promoter proximal region sequence-specific binding	4	RBPJL	-3.32883	0.000421871	-2
MF	GO:0000982	transcription factor activity, RNA polymerase II core promoter proximal region sequence-specific binding	4	ATF3	-2.35045	0.000421871	-2
MF	GO:0000982	transcription factor activity, RNA polymerase II core promoter proximal region sequence-specific binding	4	FOSL2	-3.20078	0.000421871	-2
BP	GO:0060048	cardiac muscle contraction	4	MAP2K6	2.51695	0.00125822	2
BP	GO:0060048	cardiac muscle contraction	4	MYL2	5.15503	0.00125822	2
BP	GO:0060048	cardiac muscle contraction	4	MYL3	3.45814	0.00125822	2
BP	GO:0060048	cardiac muscle contraction	4	TNNI1	3.94364	0.00125822	2
BP	GO:0050729	positive regulation of inflammatory response	4	CCLI10	-3.31282	0.00125822	-2
BP	GO:0050729	positive regulation of inflammatory response	4	LOC417536	-3.50486	0.00125822	-2
BP	GO:0050729	positive regulation of inflammatory response	4	CCL4	-6.256	0.00125822	-2
BP	GO:0050729	positive regulation of inflammatory response	4	TLR3	-2.82016	0.00125822	-2
BP	GO:0006955	immune response	14	LOC422654	-4.3787	0.00147714	-3.74166
BP	GO:0006955	immune response	14	TNFRSF18	-2.24402	0.00147714	-3.74166
BP	GO:0006955	immune response	14	CTSS	-2.56664	0.00147714	-3.74166
BP	GO:0006955	immune response	14	TNFRSF6B	-3.91511	0.00147714	-3.74166
BP	GO:0006955	immune response	14	TNFRSF8	-2.33371	0.00147714	-3.74166
BP	GO:0006955	immune response	14	LOC100859134	-2.07171	0.00147714	-3.74166
BP	GO:0006955	immune response	14	OASL	-4.24924	0.00147714	-3.74166
BP	GO:0006955	immune response	14	C6	-3.97774	0.00147714	-3.74166
BP	GO:0006955	immune response	14	TNFAIP3	-2.0834	0.00147714	-3.74166
BP	GO:0006955	immune response	14	BF1	-3.30514	0.00147714	-3.74166
BP	GO:0006955	immune response	14	LOC100859374	-2.41324	0.00147714	-3.74166
BP	GO:0006955	immune response	14	LOC771089	-3.31206	0.00147714	-3.74166
BP	GO:0006955	immune response	14	IL10	-7.46289	0.00147714	-3.74166
BP	GO:0006955	immune response	14	IL18	-2.79051	0.00147714	-3.74166
BP	GO:0071356	cellular response to tumor necrosis factor	6	IL6	#NAME?	0.00274279	-2.44949
BP	GO:0071356	cellular response to tumor necrosis factor	6	CCLI10	-3.31282	0.00274279	-2.44949
BP	GO:0071356	cellular response to tumor necrosis factor	6	LOC417536	-3.50486	0.00274279	-2.44949
BP	GO:0071356	cellular response to tumor necrosis factor	6	CCL19	-6.60982	0.00274279	-2.44949
BP	GO:0071356	cellular response to tumor necrosis factor	6	CCL4	-6.256	0.00274279	-2.44949
BP	GO:0071356	cellular response to tumor necrosis factor	6	CX3CL1	-3.03509	0.00274279	-2.44949
CC	GO:0009897	external side of plasma membrane	12	IL6	#NAME?	0.00343374	-2.3094
CC	GO:0009897	external side of plasma membrane	12	CHRNA4	2.81589	0.00343374	-2.3094
CC	GO:0009897	external side of plasma membrane	12	TNFRSF18	-2.24402	0.00343374	-2.3094
CC	GO:0009897	external side of plasma membrane	12	CD83	-2.80183	0.00343374	-2.3094
CC	GO:0009897	external side of plasma membrane	12	CD86	-3.00816	0.00343374	-2.3094
CC	GO:0009897	external side of plasma membrane	12	KIT	-2.36783	0.00343374	-2.3094
CC	GO:0009897	external side of plasma membrane	12	VCAM1	-4.20527	0.00343374	-2.3094
CC	GO:0009897	external side of plasma membrane	12	P2RX7	-6.05153	0.00343374	-2.3094
CC	GO:0009897	external side of plasma membrane	12	B2M	-4.26241	0.00343374	-2.3094
CC	GO:0009897	external side of plasma membrane	12	TRPM8	2.05946	0.00343374	-2.3094
CC	GO:0009897	external side of plasma membrane	12	LOC100858751	-2.40955	0.00343374	-2.3094
CC	GO:0009897	external side of plasma membrane	12	IL7R	-3.78836	0.00343374	-2.3094
MF	GO:0043621	protein self-association	4	SPTBN5	-4.06984	0.00362153	-1
MF	GO:0043621	protein self-association	4	RYR2	2.16692	0.00362153	-1
MF	GO:0043621	protein self-association	4	TNFAIP3	-2.0834	0.00362153	-1
MF	GO:0043621	protein self-association	4	RSAD2	-4.97068	0.00362153	-1
BP	GO:0046627	negative regulation of insulin receptor signaling pathway	4	PTPN2	-2.59211	0.00362153	-2
BP	GO:0046627	negative regulation of insulin receptor signaling pathway	4	SOCS1	-4.33819	0.00362153	-2
BP	GO:0046627	negative regulation of insulin receptor signaling pathway	4	SOCS3	-2.24837	0.00362153	-2
BP	GO:0046627	negative regulation of insulin receptor signaling pathway	4	PRKCQ	-3.62581	0.00362153	-2
BP	GO:0008217	regulation of blood pressure	5	CACNA1B	2.0531	0.00364114	0.447214
BP	GO:0008217	regulation of blood pressure	5	NPR3	2.27683	0.00364114	0.447214
BP	GO:0008217	regulation of blood pressure	5	ERAP1	-2.60306	0.00364114	0.447214
BP	GO:0008217	regulation of blood pressure	5	LNPEP	-2.0719	0.00364114	0.447214
BP	GO:0008217	regulation of blood pressure	5	TRHDE	2.01502	0.00364114	0.447214
MF	GO:0005125	cytokine activity	9	IL6	#NAME?	0.00400555	-2.33333
MF	GO:0005125	cytokine activity	9	SPP1	-5.08407	0.00400555	-2.33333
MF	GO:0005125	cytokine activity	9	IL12B	-4.75667	0.00400555	-2.33333
MF	GO:0005125	cytokine activity	9	IFNB	#NAME?	0.00400555	-2.33333
MF	GO:0005125	cytokine activity	9	IL10	-7.46289	0.00400555	-2.33333
MF	GO:0005125	cytokine activity	9	IL16	-2.98188	0.00400555	-2.33333
MF	GO:0005125	cytokine activity	9	IL18	-2.79051	0.00400555	-2.33333
MF	GO:0005125	cytokine activity	9	IL34	-2.71884	0.00400555	-2.33333
MF	GO:0005125	cytokine activity	9	NDP	4.26364	0.00400555	-2.33333
BP	GO:0007186	G-protein coupled receptor signaling pathway	20	LOC422150	-2.138	0.00400555	-4.47214
BP	GO:0007186	G-protein coupled receptor signaling pathway	20	BDKRB1	-2.83935	0.00400555	-4.47214
BP	GO:0007186	G-protein coupled receptor signaling pathway	20	BDKRB2	-3.41048	0.00400555	-4.47214
BP	GO:0007186	G-protein coupled receptor signaling pathway	20	LOC422654	-4.3787	0.00400555	-4.47214
BP	GO:0007186	G-protein coupled receptor signaling pathway	20	TAAR1	-3.79331	0.00400555	-4.47214
BP	GO:0007186	G-protein coupled receptor signaling pathway	20	GPR17	-2.25176	0.00400555	-4.47214
BP	GO:0007186	G-protein coupled receptor signaling pathway	20	AVPR1B	-6.71116	0.00400555	-4.47214
BP	GO:0007186	G-protein coupled receptor signaling pathway	20	GPRC5A	-3.15587	0.00400555	-4.47214
BP	GO:0007186	G-protein coupled receptor signaling pathway	20	CCLI10	-3.31282	0.00400555	-4.47214
BP	GO:0007186	G-protein coupled receptor signaling pathway	20	LOC417536	-3.50486	0.00400555	-4.47214
BP	GO:0007186	G-protein coupled receptor signaling pathway	20	SCTR	-2.87514	0.00400555	-4.47214
BP	GO:0007186	G-protein coupled receptor signaling pathway	20	GNGT2	-3.59668	0.00400555	-4.47214
BP	GO:0007186	G-protein coupled receptor signaling pathway	20	ACKR4	-2.36693	0.00400555	-4.47214
BP	GO:0007186	G-protein coupled receptor signaling pathway	20	LOC771308	-6.4553	0.00400555	-4.47214
BP	GO:0007186	G-protein coupled receptor signaling pathway	20	CCL19	-6.60982	0.00400555	-4.47214
BP	GO:0007186	G-protein coupled receptor signaling pathway	20	C3AR1	-3.26295	0.00400555	-4.47214
BP	GO:0007186	G-protein coupled receptor signaling pathway	20	CCL4	-6.256	0.00400555	-4.47214
BP	GO:0007186	G-protein coupled receptor signaling pathway	20	CRHR2	-2.13596	0.00400555	-4.47214
BP	GO:0007186	G-protein coupled receptor signaling pathway	20	LOC101752158	-3.94264	0.00400555	-4.47214
BP	GO:0007186	G-protein coupled receptor signaling pathway	20	CX3CL1	-3.03509	0.00400555	-4.47214
BP	GO:0032496	response to lipopolysaccharide	8	BDKRB1	-2.83935	0.00402081	-2.82843
BP	GO:0032496	response to lipopolysaccharide	8	LOC422654	-4.3787	0.00402081	-2.82843
BP	GO:0032496	response to lipopolysaccharide	8	TNFRSF18	-2.24402	0.00402081	-2.82843
BP	GO:0032496	response to lipopolysaccharide	8	TNFRSF6B	-3.91511	0.00402081	-2.82843
BP	GO:0032496	response to lipopolysaccharide	8	LCN8	-4.06676	0.00402081	-2.82843
BP	GO:0032496	response to lipopolysaccharide	8	TNFRSF8	-2.33371	0.00402081	-2.82843
BP	GO:0032496	response to lipopolysaccharide	8	P2RX7	-6.05153	0.00402081	-2.82843
BP	GO:0032496	response to lipopolysaccharide	8	PTGFR	-2.80744	0.00402081	-2.82843
MF	GO:0003725	double-stranded RNA binding	5	IFIH1	-3.56291	0.00427527	-2.23607
MF	GO:0003725	double-stranded RNA binding	5	OASL	-4.24924	0.00427527	-2.23607
MF	GO:0003725	double-stranded RNA binding	5	EIF2AK2	-2.43193	0.00427527	-2.23607
MF	GO:0003725	double-stranded RNA binding	5	DHX58	-2.85547	0.00427527	-2.23607
MF	GO:0003725	double-stranded RNA binding	5	TLR3	-2.82016	0.00427527	-2.23607
CC	GO:0042612	MHC class I protein complex	4	LOC100859134	-2.07171	0.00447632	-2
CC	GO:0042612	MHC class I protein complex	4	B2M	-4.26241	0.00447632	-2
CC	GO:0042612	MHC class I protein complex	4	BF1	-3.30514	0.00447632	-2
CC	GO:0042612	MHC class I protein complex	4	LOC100859374	-2.41324	0.00447632	-2
BP	GO:0045087	innate immune response	11	NFKB2	-2.33242	0.00448398	-3.31662
BP	GO:0045087	innate immune response	11	TMEM173	-3.69815	0.00448398	-3.31662
BP	GO:0045087	innate immune response	11	IFIH1	-3.56291	0.00448398	-3.31662
BP	GO:0045087	innate immune response	11	PTX3	-3.01406	0.00448398	-3.31662
BP	GO:0045087	innate immune response	11	NLRC5	-3.04807	0.00448398	-3.31662
BP	GO:0045087	innate immune response	11	SAMHD1	-3.57606	0.00448398	-3.31662
BP	GO:0045087	innate immune response	11	RIPK2	-2.50557	0.00448398	-3.31662
BP	GO:0045087	innate immune response	11	B2M	-4.26241	0.00448398	-3.31662
BP	GO:0045087	innate immune response	11	EIF2AK2	-2.43193	0.00448398	-3.31662
BP	GO:0045087	innate immune response	11	STYK1	-2.21783	0.00448398	-3.31662
BP	GO:0045087	innate immune response	11	TLR3	-2.82016	0.00448398	-3.31662
BP	GO:0034765	regulation of ion transmembrane transport	8	SCN5A	3.25852	0.00492613	0.707107
BP	GO:0034765	regulation of ion transmembrane transport	8	CACNA1B	2.0531	0.00492613	0.707107
BP	GO:0034765	regulation of ion transmembrane transport	8	KCNA3	-3.15333	0.00492613	0.707107
BP	GO:0034765	regulation of ion transmembrane transport	8	KCNB2	2.22435	0.00492613	0.707107
BP	GO:0034765	regulation of ion transmembrane transport	8	KCNC1	3.73972	0.00492613	0.707107
BP	GO:0034765	regulation of ion transmembrane transport	8	KCNJ5	-2.00635	0.00492613	0.707107
BP	GO:0034765	regulation of ion transmembrane transport	8	KCNJ15	-2.5118	0.00492613	0.707107
BP	GO:0034765	regulation of ion transmembrane transport	8	NALCN	2.98931	0.00492613	0.707107
BP	GO:0046426	negative regulation of JAK-STAT cascade	5	SOCS1	-4.33819	0.00501837	0.447214
BP	GO:0046426	negative regulation of JAK-STAT cascade	5	SOCS3	-2.24837	0.00501837	0.447214
BP	GO:0046426	negative regulation of JAK-STAT cascade	5	LRRTM1	5.60919	0.00501837	0.447214
BP	GO:0046426	negative regulation of JAK-STAT cascade	5	LRRTM4	2.23677	0.00501837	0.447214
BP	GO:0046426	negative regulation of JAK-STAT cascade	5	RTN4R	2.57364	0.00501837	0.447214
BP	GO:0007626	locomotory behavior	7	CHRNA4	2.81589	0.00501837	2.64575
BP	GO:0007626	locomotory behavior	7	PITX3	2.11939	0.00501837	2.64575
BP	GO:0007626	locomotory behavior	7	CACNA1B	2.0531	0.00501837	2.64575
BP	GO:0007626	locomotory behavior	7	LRRTM1	5.60919	0.00501837	2.64575
BP	GO:0007626	locomotory behavior	7	PAK6	2.32566	0.00501837	2.64575
BP	GO:0007626	locomotory behavior	7	DRD3	3.16151	0.00501837	2.64575
BP	GO:0007626	locomotory behavior	7	ATP2B2	2.63562	0.00501837	2.64575
BP	GO:0060291	long-term synaptic potentiation	4	VAMP2	-3.08827	0.00501837	0
BP	GO:0060291	long-term synaptic potentiation	4	GRIN2A	2.46686	0.00501837	0
BP	GO:0060291	long-term synaptic potentiation	4	SERPINE2	-2.72776	0.00501837	0
BP	GO:0060291	long-term synaptic potentiation	4	LRRTM1	5.60919	0.00501837	0
BP	GO:0010628	positive regulation of gene expression	11	OLFM1	2.35656	0.00501837	-0.904534
BP	GO:0010628	positive regulation of gene expression	11	SHH	-2.39584	0.00501837	-0.904534
BP	GO:0010628	positive regulation of gene expression	11	PIK3CB	-2.40142	0.00501837	-0.904534
BP	GO:0010628	positive regulation of gene expression	11	C1QTNF6	-2.59243	0.00501837	-0.904534
BP	GO:0010628	positive regulation of gene expression	11	WNT11	2.36984	0.00501837	-0.904534
BP	GO:0010628	positive regulation of gene expression	11	KIT	-2.36783	0.00501837	-0.904534
BP	GO:0010628	positive regulation of gene expression	11	P2RX7	-6.05153	0.00501837	-0.904534
BP	GO:0010628	positive regulation of gene expression	11	EDAR	3.54404	0.00501837	-0.904534
BP	GO:0010628	positive regulation of gene expression	11	PTGFR	-2.80744	0.00501837	-0.904534
BP	GO:0010628	positive regulation of gene expression	11	GLI1	2.01099	0.00501837	-0.904534
BP	GO:0010628	positive regulation of gene expression	11	IL7R	-3.78836	0.00501837	-0.904534
MF	GO:0003779	actin binding	14	SPIRE2	-3.36267	0.00501837	1.06904
MF	GO:0003779	actin binding	14	MYH1B	4.18657	0.00501837	1.06904
MF	GO:0003779	actin binding	14	MYH1D	5.19232	0.00501837	1.06904
MF	GO:0003779	actin binding	14	MYH1F	5.40057	0.00501837	1.06904
MF	GO:0003779	actin binding	14	LOC422323	2.05181	0.00501837	1.06904
MF	GO:0003779	actin binding	14	FMN2	4.7272	0.00501837	1.06904
MF	GO:0003779	actin binding	14	PXK	-2.11867	0.00501837	1.06904
MF	GO:0003779	actin binding	14	MYRIP	-4.34593	0.00501837	1.06904
MF	GO:0003779	actin binding	14	XIRP1	2.66578	0.00501837	1.06904
MF	GO:0003779	actin binding	14	PACRG	2.82305	0.00501837	1.06904
MF	GO:0003779	actin binding	14	CALD1	-2.39864	0.00501837	1.06904
MF	GO:0003779	actin binding	14	NRAP	-2.67988	0.00501837	1.06904
MF	GO:0003779	actin binding	14	MYH7	3.04516	0.00501837	1.06904
MF	GO:0003779	actin binding	14	MYBPC3	3.43699	0.00501837	1.06904
MF	GO:0042277	peptide binding	5	BDKRB1	-2.83935	0.00501837	-1.34164
MF	GO:0042277	peptide binding	5	AVPR1B	-6.71116	0.00501837	-1.34164
MF	GO:0042277	peptide binding	5	ERAP1	-2.60306	0.00501837	-1.34164
MF	GO:0042277	peptide binding	5	LNPEP	-2.0719	0.00501837	-1.34164
MF	GO:0042277	peptide binding	5	TRHDE	2.01502	0.00501837	-1.34164
BP	GO:0001934	positive regulation of protein phosphorylation	5	RSPO1	2.97855	0.00501837	0.447214
BP	GO:0001934	positive regulation of protein phosphorylation	5	KNDC1	4.14269	0.00501837	0.447214
BP	GO:0001934	positive regulation of protein phosphorylation	5	MMP9	-2.86703	0.00501837	0.447214
BP	GO:0001934	positive regulation of protein phosphorylation	5	CDK2AP1	2.05683	0.00501837	0.447214
BP	GO:0001934	positive regulation of protein phosphorylation	5	IL34	-2.71884	0.00501837	0.447214
BP	GO:0007157	heterophilic cell-cell adhesion via plasma membrane cell adhesion molecules	4	VCAM1	-4.20527	0.00525913	-2
BP	GO:0007157	heterophilic cell-cell adhesion via plasma membrane cell adhesion molecules	4	SELE	-5.6244	0.00525913	-2
BP	GO:0007157	heterophilic cell-cell adhesion via plasma membrane cell adhesion molecules	4	LOC770026	-2.12448	0.00525913	-2
BP	GO:0007157	heterophilic cell-cell adhesion via plasma membrane cell adhesion molecules	4	CRTAM	-2.73916	0.00525913	-2
BP	GO:0007267	cell-cell signaling	6	SHH	-2.39584	0.00532002	0
BP	GO:0007267	cell-cell signaling	6	LNPEP	-2.0719	0.00532002	0
BP	GO:0007267	cell-cell signaling	6	GJA1	-2.15989	0.00532002	0
BP	GO:0007267	cell-cell signaling	6	LOC776271	2.6756	0.00532002	0
BP	GO:0007267	cell-cell signaling	6	TRHDE	2.01502	0.00532002	0
BP	GO:0007267	cell-cell signaling	6	NDP	4.26364	0.00532002	0
BP	GO:0098655	cation transmembrane transport	6	CHRNA4	2.81589	0.00532002	-0.816497
BP	GO:0098655	cation transmembrane transport	6	P2RX2	-2.77352	0.00532002	-0.816497
BP	GO:0098655	cation transmembrane transport	6	ATP13A5	-5.26668	0.00532002	-0.816497
BP	GO:0098655	cation transmembrane transport	6	TRPM6	-3.39862	0.00532002	-0.816497
BP	GO:0098655	cation transmembrane transport	6	SLC41A2	-2.80374	0.00532002	-0.816497
BP	GO:0098655	cation transmembrane transport	6	NALCN	2.98931	0.00532002	-0.816497
BP	GO:0042102	positive regulation of T cell proliferation	4	IL6	#NAME?	0.00609023	-2
BP	GO:0042102	positive regulation of T cell proliferation	4	CD86	-3.00816	0.00609023	-2
BP	GO:0042102	positive regulation of T cell proliferation	4	VCAM1	-4.20527	0.00609023	-2
BP	GO:0042102	positive regulation of T cell proliferation	4	PRKCQ	-3.62581	0.00609023	-2
MF	GO:0004860	protein kinase inhibitor activity	5	SOCS1	-4.33819	0.00657698	0.447214
MF	GO:0004860	protein kinase inhibitor activity	5	SOCS3	-2.24837	0.00657698	0.447214
MF	GO:0004860	protein kinase inhibitor activity	5	LRRTM1	5.60919	0.00657698	0.447214
MF	GO:0004860	protein kinase inhibitor activity	5	LRRTM4	2.23677	0.00657698	0.447214
MF	GO:0004860	protein kinase inhibitor activity	5	RTN4R	2.57364	0.00657698	0.447214
BP	GO:0009636	response to toxic substance	4	CNP	-3.19224	0.00729857	-2
BP	GO:0009636	response to toxic substance	4	EIF2AK2	-2.43193	0.00729857	-2
BP	GO:0009636	response to toxic substance	4	TRPM6	-3.39862	0.00729857	-2
BP	GO:0009636	response to toxic substance	4	SLC6A14	-4.57042	0.00729857	-2
MF	GO:0005044	scavenger receptor activity	6	TMPRSS2	2.02284	0.00751601	-1.63299
MF	GO:0005044	scavenger receptor activity	6	ACKR4	-2.36693	0.00751601	-1.63299
MF	GO:0005044	scavenger receptor activity	6	DMBT1L	-3.93205	0.00751601	-1.63299
MF	GO:0005044	scavenger receptor activity	6	MARCO	-2.14327	0.00751601	-1.63299
MF	GO:0005044	scavenger receptor activity	6	LOC771089	-3.31206	0.00751601	-1.63299
MF	GO:0005044	scavenger receptor activity	6	PIT54	-2.70742	0.00751601	-1.63299
BP	GO:0046330	positive regulation of JNK cascade	5	FGF19	-3.51917	0.00829968	-1.34164
BP	GO:0046330	positive regulation of JNK cascade	5	EDAR	3.54404	0.00829968	-1.34164
BP	GO:0046330	positive regulation of JNK cascade	5	CCL19	-6.60982	0.00829968	-1.34164
BP	GO:0046330	positive regulation of JNK cascade	5	LOC100859853	-3.13935	0.00829968	-1.34164
BP	GO:0046330	positive regulation of JNK cascade	5	TLR3	-2.82016	0.00829968	-1.34164
CC	GO:0043204	perikaryon	4	LOC423919	-2.37081	0.00830378	-1
CC	GO:0043204	perikaryon	4	OLFM1	2.35656	0.00830378	-1
CC	GO:0043204	perikaryon	4	TMEM100	-2.16026	0.00830378	-1
CC	GO:0043204	perikaryon	4	AVPR1B	-6.71116	0.00830378	-1
BP	GO:0006874	cellular calcium ion homeostasis	6	PIK3CB	-2.40142	0.00899048	0
BP	GO:0006874	cellular calcium ion homeostasis	6	STC1	-3.20513	0.00899048	0
BP	GO:0006874	cellular calcium ion homeostasis	6	STC2	2.79658	0.00899048	0
BP	GO:0006874	cellular calcium ion homeostasis	6	ATP13A5	-5.26668	0.00899048	0
BP	GO:0006874	cellular calcium ion homeostasis	6	TRPM8	2.05946	0.00899048	0
BP	GO:0006874	cellular calcium ion homeostasis	6	DRD3	3.16151	0.00899048	0
BP	GO:0045444	fat cell differentiation	5	CBY1	2.11753	0.00939916	-1.34164
BP	GO:0045444	fat cell differentiation	5	SOCS1	-4.33819	0.00939916	-1.34164
BP	GO:0045444	fat cell differentiation	5	NR4A2	-4.24432	0.00939916	-1.34164
BP	GO:0045444	fat cell differentiation	5	NR4A3	-3.02177	0.00939916	-1.34164
BP	GO:0045444	fat cell differentiation	5	STEAP4	-4.06424	0.00939916	-1.34164
MF	GO:0004867	serine-type endopeptidase inhibitor activity	6	SERPINA3	-5.48032	0.00995511	-1.63299
MF	GO:0004867	serine-type endopeptidase inhibitor activity	6	SERPINB2	-2.83829	0.00995511	-1.63299
MF	GO:0004867	serine-type endopeptidase inhibitor activity	6	SERPINE2	-2.72776	0.00995511	-1.63299
MF	GO:0004867	serine-type endopeptidase inhibitor activity	6	SERPINF1	-2.24283	0.00995511	-1.63299
MF	GO:0004867	serine-type endopeptidase inhibitor activity	6	SERPINB10	-4.81724	0.00995511	-1.63299
MF	GO:0004867	serine-type endopeptidase inhibitor activity	6	WFIKKN1	2.00258	0.00995511	-1.63299
CC	GO:0016021	integral component of membrane	123	SLC25A30	-2.53606	0.0101033	-4.77885
CC	GO:0016021	integral component of membrane	123	SLC25A47	-2.07071	0.0101033	-4.77885
CC	GO:0016021	integral component of membrane	123	LOC422150	-2.138	0.0101033	-4.77885
CC	GO:0016021	integral component of membrane	123	BDKRB1	-2.83935	0.0101033	-4.77885
CC	GO:0016021	integral component of membrane	123	BDKRB2	-3.41048	0.0101033	-4.77885
CC	GO:0016021	integral component of membrane	123	TAPBP	-2.20095	0.0101033	-4.77885
CC	GO:0016021	integral component of membrane	123	LOC418668	-2.46172	0.0101033	-4.77885
CC	GO:0016021	integral component of membrane	123	LOC417345	-3.28164	0.0101033	-4.77885
CC	GO:0016021	integral component of membrane	123	TAAR1	-3.79331	0.0101033	-4.77885
CC	GO:0016021	integral component of membrane	123	MPEG1	-2.06388	0.0101033	-4.77885
CC	GO:0016021	integral component of membrane	123	GPR17	-2.25176	0.0101033	-4.77885
CC	GO:0016021	integral component of membrane	123	TMEM100	-2.16026	0.0101033	-4.77885
CC	GO:0016021	integral component of membrane	123	CYP4B1	4.55821	0.0101033	-4.77885
CC	GO:0016021	integral component of membrane	123	LOC419112	-2.02394	0.0101033	-4.77885
CC	GO:0016021	integral component of membrane	123	PRRG4	-2.38942	0.0101033	-4.77885
CC	GO:0016021	integral component of membrane	123	TMEM173	-3.69815	0.0101033	-4.77885
CC	GO:0016021	integral component of membrane	123	CNTNAP5	2.96805	0.0101033	-4.77885
CC	GO:0016021	integral component of membrane	123	LOC100859780	#NAME?	0.0101033	-4.77885
CC	GO:0016021	integral component of membrane	123	RNF144A	2.19668	0.0101033	-4.77885
CC	GO:0016021	integral component of membrane	123	IL10RA	-2.91052	0.0101033	-4.77885
CC	GO:0016021	integral component of membrane	123	ANO9	-3.02432	0.0101033	-4.77885
CC	GO:0016021	integral component of membrane	123	LRAT	2.18219	0.0101033	-4.77885
CC	GO:0016021	integral component of membrane	123	CD83	-2.80183	0.0101033	-4.77885
CC	GO:0016021	integral component of membrane	123	CD86	-3.00816	0.0101033	-4.77885
CC	GO:0016021	integral component of membrane	123	REEP6	2.15878	0.0101033	-4.77885
CC	GO:0016021	integral component of membrane	123	TP53I11	2.13144	0.0101033	-4.77885
CC	GO:0016021	integral component of membrane	123	GPRC5A	-3.15587	0.0101033	-4.77885
CC	GO:0016021	integral component of membrane	123	LOC770612	-3.52201	0.0101033	-4.77885
CC	GO:0016021	integral component of membrane	123	KIT	-2.36783	0.0101033	-4.77885
CC	GO:0016021	integral component of membrane	123	TAP2	-3.08418	0.0101033	-4.77885
CC	GO:0016021	integral component of membrane	123	ATP10B	-3.55678	0.0101033	-4.77885
CC	GO:0016021	integral component of membrane	123	VCAM1	-4.20527	0.0101033	-4.77885
CC	GO:0016021	integral component of membrane	123	TARP	-3.16238	0.0101033	-4.77885
CC	GO:0016021	integral component of membrane	123	SLC1A6	-4.07319	0.0101033	-4.77885
CC	GO:0016021	integral component of membrane	123	VAMP2	-3.08827	0.0101033	-4.77885
CC	GO:0016021	integral component of membrane	123	TMPRSS2	2.02284	0.0101033	-4.77885
CC	GO:0016021	integral component of membrane	123	PLN	2.30621	0.0101033	-4.77885
CC	GO:0016021	integral component of membrane	123	CA9	2.18441	0.0101033	-4.77885
CC	GO:0016021	integral component of membrane	123	CMTM6	-2.67942	0.0101033	-4.77885
CC	GO:0016021	integral component of membrane	123	CYP1B1	3.04669	0.0101033	-4.77885
CC	GO:0016021	integral component of membrane	123	PTPN2	-2.59211	0.0101033	-4.77885
CC	GO:0016021	integral component of membrane	123	TCIRG1	-2.77421	0.0101033	-4.77885
CC	GO:0016021	integral component of membrane	123	SCTR	-2.87514	0.0101033	-4.77885
CC	GO:0016021	integral component of membrane	123	PTPRC	-2.14734	0.0101033	-4.77885
CC	GO:0016021	integral component of membrane	123	PIGA	-2.07129	0.0101033	-4.77885
CC	GO:0016021	integral component of membrane	123	LOC101748239	-2.10108	0.0101033	-4.77885
CC	GO:0016021	integral component of membrane	123	ACKR4	-2.36693	0.0101033	-4.77885
CC	GO:0016021	integral component of membrane	123	NPR3	2.27683	0.0101033	-4.77885
CC	GO:0016021	integral component of membrane	123	LOC423849	-2.50989	0.0101033	-4.77885
CC	GO:0016021	integral component of membrane	123	RCAN2	2.14993	0.0101033	-4.77885
CC	GO:0016021	integral component of membrane	123	SCARB2	2.48224	0.0101033	-4.77885
CC	GO:0016021	integral component of membrane	123	DRAM1	-4.52765	0.0101033	-4.77885
CC	GO:0016021	integral component of membrane	123	SELE	-5.6244	0.0101033	-4.77885
CC	GO:0016021	integral component of membrane	123	TM6SF2	2.07748	0.0101033	-4.77885
CC	GO:0016021	integral component of membrane	123	FNDC4	-3.38091	0.0101033	-4.77885
CC	GO:0016021	integral component of membrane	123	LNPEP	-2.0719	0.0101033	-4.77885
CC	GO:0016021	integral component of membrane	123	CYP3A7	-3.68438	0.0101033	-4.77885
CC	GO:0016021	integral component of membrane	123	SORCS1	-2.22143	0.0101033	-4.77885
CC	GO:0016021	integral component of membrane	123	VSIG1	-3.20065	0.0101033	-4.77885
CC	GO:0016021	integral component of membrane	123	IL18RAP	-6.03792	0.0101033	-4.77885
CC	GO:0016021	integral component of membrane	123	IL22RA2	-3.05037	0.0101033	-4.77885
CC	GO:0016021	integral component of membrane	123	SLC51B	-2.78823	0.0101033	-4.77885
CC	GO:0016021	integral component of membrane	123	GJA1	-2.15989	0.0101033	-4.77885
CC	GO:0016021	integral component of membrane	123	GJA3	-3.15504	0.0101033	-4.77885
CC	GO:0016021	integral component of membrane	123	LOC771308	-6.4553	0.0101033	-4.77885
CC	GO:0016021	integral component of membrane	123	LRRTM1	5.60919	0.0101033	-4.77885
CC	GO:0016021	integral component of membrane	123	LRRTM4	2.23677	0.0101033	-4.77885
CC	GO:0016021	integral component of membrane	123	IFI27L2	-4.32354	0.0101033	-4.77885
CC	GO:0016021	integral component of membrane	123	KCNA3	-3.15333	0.0101033	-4.77885
CC	GO:0016021	integral component of membrane	123	STYK1	-2.21783	0.0101033	-4.77885
CC	GO:0016021	integral component of membrane	123	KCNB2	2.22435	0.0101033	-4.77885
CC	GO:0016021	integral component of membrane	123	FAIM2	2.53288	0.0101033	-4.77885
CC	GO:0016021	integral component of membrane	123	DIO2	-5.71179	0.0101033	-4.77885
CC	GO:0016021	integral component of membrane	123	EDAR	3.54404	0.0101033	-4.77885
CC	GO:0016021	integral component of membrane	123	KCNC1	3.73972	0.0101033	-4.77885
CC	GO:0016021	integral component of membrane	123	IL1R2	-5.42606	0.0101033	-4.77885
CC	GO:0016021	integral component of membrane	123	LRTM2	-3.05837	0.0101033	-4.77885
CC	GO:0016021	integral component of membrane	123	LOC426106	-2.07826	0.0101033	-4.77885
CC	GO:0016021	integral component of membrane	123	MARCO	-2.14327	0.0101033	-4.77885
CC	GO:0016021	integral component of membrane	123	MMEL1	4.05348	0.0101033	-4.77885
CC	GO:0016021	integral component of membrane	123	GABRA4	3.82579	0.0101033	-4.77885
CC	GO:0016021	integral component of membrane	123	GABRB2	4.43393	0.0101033	-4.77885
CC	GO:0016021	integral component of membrane	123	BF1	-3.30514	0.0101033	-4.77885
CC	GO:0016021	integral component of membrane	123	LOC100859374	-2.41324	0.0101033	-4.77885
CC	GO:0016021	integral component of membrane	123	LOC101750812	-3.70521	0.0101033	-4.77885
CC	GO:0016021	integral component of membrane	123	BG1	2.00938	0.0101033	-4.77885
CC	GO:0016021	integral component of membrane	123	LOC424523	#NAME?	0.0101033	-4.77885
CC	GO:0016021	integral component of membrane	123	C3AR1	-3.26295	0.0101033	-4.77885
CC	GO:0016021	integral component of membrane	123	GABRG3	2.53175	0.0101033	-4.77885
CC	GO:0016021	integral component of membrane	123	ADCY2	-2.27121	0.0101033	-4.77885
CC	GO:0016021	integral component of membrane	123	TRPM5	-4.38886	0.0101033	-4.77885
CC	GO:0016021	integral component of membrane	123	TRPM6	-3.39862	0.0101033	-4.77885
CC	GO:0016021	integral component of membrane	123	TRPM8	2.05946	0.0101033	-4.77885
CC	GO:0016021	integral component of membrane	123	SDC4	-2.98066	0.0101033	-4.77885
CC	GO:0016021	integral component of membrane	123	B3GALT1	2.4993	0.0101033	-4.77885
CC	GO:0016021	integral component of membrane	123	GIMAP1	-2.05548	0.0101033	-4.77885
CC	GO:0016021	integral component of membrane	123	STOML1	-4.03588	0.0101033	-4.77885
CC	GO:0016021	integral component of membrane	123	CRHR2	-2.13596	0.0101033	-4.77885
CC	GO:0016021	integral component of membrane	123	TLR15	-2.66014	0.0101033	-4.77885
CC	GO:0016021	integral component of membrane	123	LIPG	-2.72365	0.0101033	-4.77885
CC	GO:0016021	integral component of membrane	123	SLC2A5	2.10912	0.0101033	-4.77885
CC	GO:0016021	integral component of membrane	123	TAPBPL	-2.01239	0.0101033	-4.77885
CC	GO:0016021	integral component of membrane	123	CX3CL1	-3.03509	0.0101033	-4.77885
CC	GO:0016021	integral component of membrane	123	SCNN1D	-3.76099	0.0101033	-4.77885
CC	GO:0016021	integral component of membrane	123	IL1RAPL2	2.99546	0.0101033	-4.77885
CC	GO:0016021	integral component of membrane	123	SLC41A2	-2.80374	0.0101033	-4.77885
CC	GO:0016021	integral component of membrane	123	RNF122	2.05685	0.0101033	-4.77885
CC	GO:0016021	integral component of membrane	123	LOC101750517	2.00846	0.0101033	-4.77885
CC	GO:0016021	integral component of membrane	123	AGPAT1	-5.29408	0.0101033	-4.77885
CC	GO:0016021	integral component of membrane	123	TECRL	4.36912	0.0101033	-4.77885
CC	GO:0016021	integral component of membrane	123	LTK	2.36585	0.0101033	-4.77885
CC	GO:0016021	integral component of membrane	123	NALCN	2.98931	0.0101033	-4.77885
CC	GO:0016021	integral component of membrane	123	SLC46A2	-5.24743	0.0101033	-4.77885
CC	GO:0016021	integral component of membrane	123	LRP1B	3.38171	0.0101033	-4.77885
CC	GO:0016021	integral component of membrane	123	PCDH17	-2.04457	0.0101033	-4.77885
CC	GO:0016021	integral component of membrane	123	TSPO2	-2.5938	0.0101033	-4.77885
CC	GO:0016021	integral component of membrane	123	SERINC2	-2.10712	0.0101033	-4.77885
CC	GO:0016021	integral component of membrane	123	RNF19B	-3.40825	0.0101033	-4.77885
CC	GO:0016021	integral component of membrane	123	IL4R	-2.03605	0.0101033	-4.77885
CC	GO:0016021	integral component of membrane	123	LOC100858751	-2.40955	0.0101033	-4.77885
CC	GO:0016021	integral component of membrane	123	IL7R	-3.78836	0.0101033	-4.77885
CC	GO:0016021	integral component of membrane	123	B3GNT4	-3.67815	0.0101033	-4.77885
CC	GO:0016021	integral component of membrane	123	B3GNT7	-6.28672	0.0101033	-4.77885
MF	GO:0003774	motor activity	5	MYH1B	4.18657	0.0106151	2.23607
MF	GO:0003774	motor activity	5	MYH1D	5.19232	0.0106151	2.23607
MF	GO:0003774	motor activity	5	MYH1F	5.40057	0.0106151	2.23607
MF	GO:0003774	motor activity	5	MYH7B	3.09075	0.0106151	2.23607
MF	GO:0003774	motor activity	5	MYH7	3.04516	0.0106151	2.23607
BP	GO:0043066	negative regulation of apoptotic process	13	IL6	#NAME?	0.0106151	-1.38675
BP	GO:0043066	negative regulation of apoptotic process	13	SHH	-2.39584	0.0106151	-1.38675
BP	GO:0043066	negative regulation of apoptotic process	13	NKX2-6	-4.03231	0.0106151	-1.38675
BP	GO:0043066	negative regulation of apoptotic process	13	LCN8	-4.06676	0.0106151	-1.38675
BP	GO:0043066	negative regulation of apoptotic process	13	WNT11	2.36984	0.0106151	-1.38675
BP	GO:0043066	negative regulation of apoptotic process	13	FMN2	4.7272	0.0106151	-1.38675
BP	GO:0043066	negative regulation of apoptotic process	13	PIM1	-2.05736	0.0106151	-1.38675
BP	GO:0043066	negative regulation of apoptotic process	13	SOCS3	-2.24837	0.0106151	-1.38675
BP	GO:0043066	negative regulation of apoptotic process	13	EIF2AK2	-2.43193	0.0106151	-1.38675
BP	GO:0043066	negative regulation of apoptotic process	13	ACTC1	4.51679	0.0106151	-1.38675
BP	GO:0043066	negative regulation of apoptotic process	13	PTGFR	-2.80744	0.0106151	-1.38675
BP	GO:0043066	negative regulation of apoptotic process	13	LTK	2.36585	0.0106151	-1.38675
BP	GO:0043066	negative regulation of apoptotic process	13	CAPN3	-3.28417	0.0106151	-1.38675
BP	GO:0006469	negative regulation of protein kinase activity	6	SOCS1	-4.33819	0.0106151	0
BP	GO:0006469	negative regulation of protein kinase activity	6	SOCS3	-2.24837	0.0106151	0
BP	GO:0006469	negative regulation of protein kinase activity	6	LRRTM1	5.60919	0.0106151	0
BP	GO:0006469	negative regulation of protein kinase activity	6	LRRTM4	2.23677	0.0106151	0
BP	GO:0006469	negative regulation of protein kinase activity	6	LOC100859853	-3.13935	0.0106151	0
BP	GO:0006469	negative regulation of protein kinase activity	6	RTN4R	2.57364	0.0106151	0
BP	GO:0033209	tumor necrosis factor-mediated signaling pathway	4	STAT1	-3.90026	0.0106151	-2
BP	GO:0033209	tumor necrosis factor-mediated signaling pathway	4	TNFRSF18	-2.24402	0.0106151	-2
BP	GO:0033209	tumor necrosis factor-mediated signaling pathway	4	TNFRSF6B	-3.91511	0.0106151	-2
BP	GO:0033209	tumor necrosis factor-mediated signaling pathway	4	TNFRSF8	-2.33371	0.0106151	-2
BP	GO:0019882	antigen processing and presentation	4	CTSS	-2.56664	0.0106151	-2
BP	GO:0019882	antigen processing and presentation	4	LOC100859134	-2.07171	0.0106151	-2
BP	GO:0019882	antigen processing and presentation	4	BF1	-3.30514	0.0106151	-2
BP	GO:0019882	antigen processing and presentation	4	LOC100859374	-2.41324	0.0106151	-2
BP	GO:0010951	negative regulation of endopeptidase activity	8	SERPINA3	-5.48032	0.0106151	-1.41421
BP	GO:0010951	negative regulation of endopeptidase activity	8	SERPINB2	-2.83829	0.0106151	-1.41421
BP	GO:0010951	negative regulation of endopeptidase activity	8	SERPINE2	-2.72776	0.0106151	-1.41421
BP	GO:0010951	negative regulation of endopeptidase activity	8	SERPINF1	-2.24283	0.0106151	-1.41421
BP	GO:0010951	negative regulation of endopeptidase activity	8	SERPINB10	-4.81724	0.0106151	-1.41421
BP	GO:0010951	negative regulation of endopeptidase activity	8	WFIKKN1	2.00258	0.0106151	-1.41421
BP	GO:0010951	negative regulation of endopeptidase activity	8	AHSG	2.11965	0.0106151	-1.41421
BP	GO:0010951	negative regulation of endopeptidase activity	8	A2ML4	-2.56514	0.0106151	-1.41421
BP	GO:0034220	ion transmembrane transport	6	GRIA3	2.6197	0.0119695	2.44949
BP	GO:0034220	ion transmembrane transport	6	GABRA4	3.82579	0.0119695	2.44949
BP	GO:0034220	ion transmembrane transport	6	GABRB2	4.43393	0.0119695	2.44949
BP	GO:0034220	ion transmembrane transport	6	GABRG3	2.53175	0.0119695	2.44949
BP	GO:0034220	ion transmembrane transport	6	NALCN	2.98931	0.0119695	2.44949
BP	GO:0034220	ion transmembrane transport	6	AQP3	2.61133	0.0119695	2.44949
MF	GO:0005251	delayed rectifier potassium channel activity	4	KCNA3	-3.15333	0.012316	1
MF	GO:0005251	delayed rectifier potassium channel activity	4	KCNB2	2.22435	0.012316	1
MF	GO:0005251	delayed rectifier potassium channel activity	4	KCNC1	3.73972	0.012316	1
MF	GO:0005251	delayed rectifier potassium channel activity	4	KCNE2	2.89861	0.012316	1
BP	GO:0001666	response to hypoxia	5	CHRNA4	2.81589	0.0133956	-0.447214
BP	GO:0001666	response to hypoxia	5	P2RX2	-2.77352	0.0133956	-0.447214
BP	GO:0001666	response to hypoxia	5	SOD3	-3.89706	0.0133956	-0.447214
BP	GO:0001666	response to hypoxia	5	RYR2	2.16692	0.0133956	-0.447214
BP	GO:0001666	response to hypoxia	5	NR4A2	-4.24432	0.0133956	-0.447214
CC	GO:0045177	apical part of cell	5	REEP6	2.15878	0.0149369	0.447214
CC	GO:0045177	apical part of cell	5	VCAM1	-4.20527	0.0149369	0.447214
CC	GO:0045177	apical part of cell	5	PTPRZ1	2.35698	0.0149369	0.447214
CC	GO:0045177	apical part of cell	5	CYP3A7	-3.68438	0.0149369	0.447214
CC	GO:0045177	apical part of cell	5	EDAR	3.54404	0.0149369	0.447214
CC	GO:0030054	cell junction	11	OLFM1	2.35656	0.0172956	2.7136
CC	GO:0030054	cell junction	11	GRIA3	2.6197	0.0172956	2.7136
CC	GO:0030054	cell junction	11	CHRNA4	2.81589	0.0172956	2.7136
CC	GO:0030054	cell junction	11	CHRM3	-2.86636	0.0172956	2.7136
CC	GO:0030054	cell junction	11	GRIN2A	2.46686	0.0172956	2.7136
CC	GO:0030054	cell junction	11	XIRP1	2.66578	0.0172956	2.7136
CC	GO:0030054	cell junction	11	AMPH	3.32424	0.0172956	2.7136
CC	GO:0030054	cell junction	11	GLRA4	4.42127	0.0172956	2.7136
CC	GO:0030054	cell junction	11	GABRA4	3.82579	0.0172956	2.7136
CC	GO:0030054	cell junction	11	GABRB2	4.43393	0.0172956	2.7136
CC	GO:0030054	cell junction	11	GABRG3	2.53175	0.0172956	2.7136
BP	GO:0023014	signal transduction by protein phosphorylation	5	KIT	-2.36783	0.0189326	0.447214
BP	GO:0023014	signal transduction by protein phosphorylation	5	BMPR1B	2.12447	0.0189326	0.447214
BP	GO:0023014	signal transduction by protein phosphorylation	5	PAK6	2.32566	0.0189326	0.447214
BP	GO:0023014	signal transduction by protein phosphorylation	5	MAP3K8	-3.38235	0.0189326	0.447214
BP	GO:0023014	signal transduction by protein phosphorylation	5	KCNH5	2.58838	0.0189326	0.447214
CC	GO:0045202	synapse	8	OLFM1	2.35656	0.0207362	1.41421
CC	GO:0045202	synapse	8	CHRM3	-2.86636	0.0207362	1.41421
CC	GO:0045202	synapse	8	MYRIP	-4.34593	0.0207362	1.41421
CC	GO:0045202	synapse	8	GLRA4	4.42127	0.0207362	1.41421
CC	GO:0045202	synapse	8	GABRA4	3.82579	0.0207362	1.41421
CC	GO:0045202	synapse	8	GABRB2	4.43393	0.0207362	1.41421
CC	GO:0045202	synapse	8	GABRG3	2.53175	0.0207362	1.41421
CC	GO:0045202	synapse	8	PACSIN1	3.18887	0.0207362	1.41421
BP	GO:0000902	cell morphogenesis	4	P2RX7	-6.05153	0.0239954	-2
BP	GO:0000902	cell morphogenesis	4	KLHL10	-3.84964	0.0239954	-2
BP	GO:0000902	cell morphogenesis	4	LIPA	-2.31942	0.0239954	-2
BP	GO:0000902	cell morphogenesis	4	IL7R	-3.78836	0.0239954	-2
CC	GO:0005623	cell	9	OLFM1	2.35656	0.0246899	-1
CC	GO:0005623	cell	9	FASN	-3.63063	0.0246899	-1
CC	GO:0005623	cell	9	SPP1	-5.08407	0.0246899	-1
CC	GO:0005623	cell	9	LCN8	-4.06676	0.0246899	-1
CC	GO:0005623	cell	9	LRAT	2.18219	0.0246899	-1
CC	GO:0005623	cell	9	ISL2	-2.33621	0.0246899	-1
CC	GO:0005623	cell	9	CALD1	-2.39864	0.0246899	-1
CC	GO:0005623	cell	9	CYP3A7	-3.68438	0.0246899	-1
CC	GO:0005623	cell	9	MYBPC3	3.43699	0.0246899	-1
BP	GO:0051260	protein homooligomerization	8	SPTBN5	-4.06984	0.0246899	-1.41421
BP	GO:0051260	protein homooligomerization	8	C1QTNF6	-2.59243	0.0246899	-1.41421
BP	GO:0051260	protein homooligomerization	8	P2RX2	-2.77352	0.0246899	-1.41421
BP	GO:0051260	protein homooligomerization	8	KCNA3	-3.15333	0.0246899	-1.41421
BP	GO:0051260	protein homooligomerization	8	KCNB2	2.22435	0.0246899	-1.41421
BP	GO:0051260	protein homooligomerization	8	KCNC1	3.73972	0.0246899	-1.41421
BP	GO:0051260	protein homooligomerization	8	IKBKE	-2.30739	0.0246899	-1.41421
BP	GO:0051260	protein homooligomerization	8	SCUBE3	-2.94148	0.0246899	-1.41421
BP	GO:0006898	receptor-mediated endocytosis	6	TMPRSS2	2.02284	0.026173	-1.63299
BP	GO:0006898	receptor-mediated endocytosis	6	ACKR4	-2.36693	0.026173	-1.63299
BP	GO:0006898	receptor-mediated endocytosis	6	DMBT1L	-3.93205	0.026173	-1.63299
BP	GO:0006898	receptor-mediated endocytosis	6	MARCO	-2.14327	0.026173	-1.63299
BP	GO:0006898	receptor-mediated endocytosis	6	LOC771089	-3.31206	0.026173	-1.63299
BP	GO:0006898	receptor-mediated endocytosis	6	PIT54	-2.70742	0.026173	-1.63299
CC	GO:0008076	voltage-gated potassium channel complex	5	AKAP9	-2.10148	0.0265266	0.447214
CC	GO:0008076	voltage-gated potassium channel complex	5	KCNA3	-3.15333	0.0265266	0.447214
CC	GO:0008076	voltage-gated potassium channel complex	5	KCNB2	2.22435	0.0265266	0.447214
CC	GO:0008076	voltage-gated potassium channel complex	5	KCNC1	3.73972	0.0265266	0.447214
CC	GO:0008076	voltage-gated potassium channel complex	5	KCNE2	2.89861	0.0265266	0.447214
BP	GO:0051091	positive regulation of sequence-specific DNA binding transcription factor activity	4	IL6	#NAME?	0.0268617	-1
BP	GO:0051091	positive regulation of sequence-specific DNA binding transcription factor activity	4	KIT	-2.36783	0.0268617	-1
BP	GO:0051091	positive regulation of sequence-specific DNA binding transcription factor activity	4	IL10	-7.46289	0.0268617	-1
BP	GO:0051091	positive regulation of sequence-specific DNA binding transcription factor activity	4	NDP	4.26364	0.0268617	-1
BP	GO:0055085	transmembrane transport	10	SLC25A47	-2.07071	0.0314173	-1.26491
BP	GO:0055085	transmembrane transport	10	TAP1	-4.25273	0.0314173	-1.26491
BP	GO:0055085	transmembrane transport	10	TAP2	-3.08418	0.0314173	-1.26491
BP	GO:0055085	transmembrane transport	10	SLC6A1	3.75829	0.0314173	-1.26491
BP	GO:0055085	transmembrane transport	10	SLC6A2	3.16617	0.0314173	-1.26491
BP	GO:0055085	transmembrane transport	10	GJA1	-2.15989	0.0314173	-1.26491
BP	GO:0055085	transmembrane transport	10	GJA3	-3.15504	0.0314173	-1.26491
BP	GO:0055085	transmembrane transport	10	SLC2A5	2.10912	0.0314173	-1.26491
BP	GO:0055085	transmembrane transport	10	SLC41A2	-2.80374	0.0314173	-1.26491
BP	GO:0055085	transmembrane transport	10	SLC46A2	-5.24743	0.0314173	-1.26491
BP	GO:0006508	proteolysis	16	CAPN6	2.67077	0.0324295	-0.5
BP	GO:0006508	proteolysis	16	LOC417848	Inf	0.0324295	-0.5
BP	GO:0006508	proteolysis	16	C1R	-2.11929	0.0324295	-0.5
BP	GO:0006508	proteolysis	16	C1S	-3.24785	0.0324295	-0.5
BP	GO:0006508	proteolysis	16	PRSS35	2.77835	0.0324295	-0.5
BP	GO:0006508	proteolysis	16	LOC101751203	3.22342	0.0324295	-0.5
BP	GO:0006508	proteolysis	16	MMP1	-4.87111	0.0324295	-0.5
BP	GO:0006508	proteolysis	16	MMP7	#NAME?	0.0324295	-0.5
BP	GO:0006508	proteolysis	16	MMP9	-2.86703	0.0324295	-0.5
BP	GO:0006508	proteolysis	16	ERAP1	-2.60306	0.0324295	-0.5
BP	GO:0006508	proteolysis	16	LNPEP	-2.0719	0.0324295	-0.5
BP	GO:0006508	proteolysis	16	PAMR1	2.40547	0.0324295	-0.5
BP	GO:0006508	proteolysis	16	MMEL1	4.05348	0.0324295	-0.5
BP	GO:0006508	proteolysis	16	TRHDE	2.01502	0.0324295	-0.5
BP	GO:0006508	proteolysis	16	CASP1	-2.01023	0.0324295	-0.5
BP	GO:0006508	proteolysis	16	CAPN3	-3.28417	0.0324295	-0.5
CC	GO:0005886	plasma membrane	55	BDKRB2	-3.41048	0.0324295	-3.371
CC	GO:0005886	plasma membrane	55	PLSCR1	-3.64072	0.0324295	-3.371
CC	GO:0005886	plasma membrane	55	SHH	-2.39584	0.0324295	-3.371
CC	GO:0005886	plasma membrane	55	SCN5A	3.25852	0.0324295	-3.371
CC	GO:0005886	plasma membrane	55	STAT2	-2.09265	0.0324295	-3.371
CC	GO:0005886	plasma membrane	55	TMEM100	-2.16026	0.0324295	-3.371
CC	GO:0005886	plasma membrane	55	SYT16	2.07446	0.0324295	-3.371
CC	GO:0005886	plasma membrane	55	ATP6V1G3	-5.81522	0.0324295	-3.371
CC	GO:0005886	plasma membrane	55	PIK3CB	-2.40142	0.0324295	-3.371
CC	GO:0005886	plasma membrane	55	TMEM173	-3.69815	0.0324295	-3.371
CC	GO:0005886	plasma membrane	55	IL10RA	-2.91052	0.0324295	-3.371
CC	GO:0005886	plasma membrane	55	ANO9	-3.02432	0.0324295	-3.371
CC	GO:0005886	plasma membrane	55	TC2N	2.91139	0.0324295	-3.371
CC	GO:0005886	plasma membrane	55	AVPR1B	-6.71116	0.0324295	-3.371
CC	GO:0005886	plasma membrane	55	CD83	-2.80183	0.0324295	-3.371
CC	GO:0005886	plasma membrane	55	GPC6	3.91051	0.0324295	-3.371
CC	GO:0005886	plasma membrane	55	BMPR1B	2.12447	0.0324295	-3.371
CC	GO:0005886	plasma membrane	55	ATP10B	-3.55678	0.0324295	-3.371
CC	GO:0005886	plasma membrane	55	VAMP2	-3.08827	0.0324295	-3.371
CC	GO:0005886	plasma membrane	55	TMPRSS2	2.02284	0.0324295	-3.371
CC	GO:0005886	plasma membrane	55	CA9	2.18441	0.0324295	-3.371
CC	GO:0005886	plasma membrane	55	PTPN2	-2.59211	0.0324295	-3.371
CC	GO:0005886	plasma membrane	55	TCIRG1	-2.77421	0.0324295	-3.371
CC	GO:0005886	plasma membrane	55	LY6E	-2.31457	0.0324295	-3.371
CC	GO:0005886	plasma membrane	55	LY96	-2.85679	0.0324295	-3.371
CC	GO:0005886	plasma membrane	55	PXK	-2.11867	0.0324295	-3.371
CC	GO:0005886	plasma membrane	55	BST1	-2.09441	0.0324295	-3.371
CC	GO:0005886	plasma membrane	55	NPR3	2.27683	0.0324295	-3.371
CC	GO:0005886	plasma membrane	55	ERAP1	-2.60306	0.0324295	-3.371
CC	GO:0005886	plasma membrane	55	LOC100859134	-2.07171	0.0324295	-3.371
CC	GO:0005886	plasma membrane	55	FNDC4	-3.38091	0.0324295	-3.371
CC	GO:0005886	plasma membrane	55	LNPEP	-2.0719	0.0324295	-3.371
CC	GO:0005886	plasma membrane	55	VSIG1	-3.20065	0.0324295	-3.371
CC	GO:0005886	plasma membrane	55	IL22RA2	-3.05037	0.0324295	-3.371
CC	GO:0005886	plasma membrane	55	SLC51B	-2.78823	0.0324295	-3.371
CC	GO:0005886	plasma membrane	55	GJA1	-2.15989	0.0324295	-3.371
CC	GO:0005886	plasma membrane	55	RGS8	2.47275	0.0324295	-3.371
CC	GO:0005886	plasma membrane	55	EDAR	3.54404	0.0324295	-3.371
CC	GO:0005886	plasma membrane	55	GABRA4	3.82579	0.0324295	-3.371
CC	GO:0005886	plasma membrane	55	GABRB2	4.43393	0.0324295	-3.371
CC	GO:0005886	plasma membrane	55	BF1	-3.30514	0.0324295	-3.371
CC	GO:0005886	plasma membrane	55	LOC100859374	-2.41324	0.0324295	-3.371
CC	GO:0005886	plasma membrane	55	RGS16	-4.50564	0.0324295	-3.371
CC	GO:0005886	plasma membrane	55	NET1	-2.28149	0.0324295	-3.371
CC	GO:0005886	plasma membrane	55	GABRG3	2.53175	0.0324295	-3.371
CC	GO:0005886	plasma membrane	55	ADCY2	-2.27121	0.0324295	-3.371
CC	GO:0005886	plasma membrane	55	MLKL	-5.99394	0.0324295	-3.371
CC	GO:0005886	plasma membrane	55	TRHDE	2.01502	0.0324295	-3.371
CC	GO:0005886	plasma membrane	55	SCNN1D	-3.76099	0.0324295	-3.371
CC	GO:0005886	plasma membrane	55	SLC41A2	-2.80374	0.0324295	-3.371
CC	GO:0005886	plasma membrane	55	NALCN	2.98931	0.0324295	-3.371
CC	GO:0005886	plasma membrane	55	IL16	-2.98188	0.0324295	-3.371
CC	GO:0005886	plasma membrane	55	PCDH17	-2.04457	0.0324295	-3.371
CC	GO:0005886	plasma membrane	55	CRTAM	-2.73916	0.0324295	-3.371
CC	GO:0005886	plasma membrane	55	CAPN3	-3.28417	0.0324295	-3.371
BP	GO:0006629	lipid metabolic process	4	NAAA	-2.02643	0.0326558	-1
BP	GO:0006629	lipid metabolic process	4	LCN8	-4.06676	0.0326558	-1
BP	GO:0006629	lipid metabolic process	4	LIPG	-2.72365	0.0326558	-1
BP	GO:0006629	lipid metabolic process	4	TECRL	4.36912	0.0326558	-1
BP	GO:0007409	axonogenesis	5	PTPRZ1	2.35698	0.0328237	0.447214
BP	GO:0007409	axonogenesis	5	CNP	-3.19224	0.0328237	0.447214
BP	GO:0007409	axonogenesis	5	LRTM2	-3.05837	0.0328237	0.447214
BP	GO:0007409	axonogenesis	5	OGN	2.07332	0.0328237	0.447214
BP	GO:0007409	axonogenesis	5	RTN4R	2.57364	0.0328237	0.447214
BP	GO:0042391	regulation of membrane potential	4	SLC1A6	-4.07319	0.0404161	-1
BP	GO:0042391	regulation of membrane potential	4	PXK	-2.11867	0.0404161	-1
BP	GO:0042391	regulation of membrane potential	4	SLC26A3	-6.99625	0.0404161	-1
BP	GO:0042391	regulation of membrane potential	4	KCNH5	2.58838	0.0404161	-1
MF	GO:0000978	RNA polymerase II core promoter proximal region sequence-specific DNA binding	12	STAT1	-3.90026	0.0404161	-1.73205
MF	GO:0000978	RNA polymerase II core promoter proximal region sequence-specific DNA binding	12	PITX3	2.11939	0.0404161	-1.73205
MF	GO:0000978	RNA polymerase II core promoter proximal region sequence-specific DNA binding	12	FOS	-2.40977	0.0404161	-1.73205
MF	GO:0000978	RNA polymerase II core promoter proximal region sequence-specific DNA binding	12	RBPJL	-3.32883	0.0404161	-1.73205
MF	GO:0000978	RNA polymerase II core promoter proximal region sequence-specific DNA binding	12	ELF3	-4.60577	0.0404161	-1.73205
MF	GO:0000978	RNA polymerase II core promoter proximal region sequence-specific DNA binding	12	EHF	-2.79543	0.0404161	-1.73205
MF	GO:0000978	RNA polymerase II core promoter proximal region sequence-specific DNA binding	12	ATF3	-2.35045	0.0404161	-1.73205
MF	GO:0000978	RNA polymerase II core promoter proximal region sequence-specific DNA binding	12	IRF1	-2.42864	0.0404161	-1.73205
MF	GO:0000978	RNA polymerase II core promoter proximal region sequence-specific DNA binding	12	FOSL2	-3.20078	0.0404161	-1.73205
MF	GO:0000978	RNA polymerase II core promoter proximal region sequence-specific DNA binding	12	TBX15	Inf	0.0404161	-1.73205
MF	GO:0000978	RNA polymerase II core promoter proximal region sequence-specific DNA binding	12	NR4A3	-3.02177	0.0404161	-1.73205
MF	GO:0000978	RNA polymerase II core promoter proximal region sequence-specific DNA binding	12	TLX1	2.58511	0.0404161	-1.73205
BP	GO:0010629	negative regulation of gene expression	5	OLFM1	2.35656	0.0405678	0.447214
BP	GO:0010629	negative regulation of gene expression	5	CDKN1A	-2.84205	0.0405678	0.447214
BP	GO:0010629	negative regulation of gene expression	5	WNT11	2.36984	0.0405678	0.447214
BP	GO:0010629	negative regulation of gene expression	5	FGF19	-3.51917	0.0405678	0.447214
BP	GO:0010629	negative regulation of gene expression	5	STC2	2.79658	0.0405678	0.447214
MF	GO:0003824	catalytic activity	4	ACSM4	Inf	0.04559	-1
MF	GO:0003824	catalytic activity	4	LOC101750112	-4.23572	0.04559	-1
MF	GO:0003824	catalytic activity	4	RSAD2	-4.97068	0.04559	-1
MF	GO:0003824	catalytic activity	4	CAPN3	-3.28417	0.04559	-1
MF	GO:0005509	calcium ion binding	25	CAPSL	-4.7607	0.0466365	1
MF	GO:0005509	calcium ion binding	25	SHH	-2.39584	0.0466365	1
MF	GO:0005509	calcium ion binding	25	SYT16	2.07446	0.0466365	1
MF	GO:0005509	calcium ion binding	25	EDIL3	3.42477	0.0466365	1
MF	GO:0005509	calcium ion binding	25	PRRG4	-2.38942	0.0466365	1
MF	GO:0005509	calcium ion binding	25	C1R	-2.11929	0.0466365	1
MF	GO:0005509	calcium ion binding	25	C1S	-3.24785	0.0466365	1
MF	GO:0005509	calcium ion binding	25	TC2N	2.91139	0.0466365	1
MF	GO:0005509	calcium ion binding	25	LOC101751203	3.22342	0.0466365	1
MF	GO:0005509	calcium ion binding	25	THBD	-2.86384	0.0466365	1
MF	GO:0005509	calcium ion binding	25	MMP1	-4.87111	0.0466365	1
MF	GO:0005509	calcium ion binding	25	GRM7	3.2195	0.0466365	1
MF	GO:0005509	calcium ion binding	25	RYR2	2.16692	0.0466365	1
MF	GO:0005509	calcium ion binding	25	LOC100858320	3.1935	0.0466365	1
MF	GO:0005509	calcium ion binding	25	PAMR1	2.40547	0.0466365	1
MF	GO:0005509	calcium ion binding	25	MYL2	5.15503	0.0466365	1
MF	GO:0005509	calcium ion binding	25	MYL3	3.45814	0.0466365	1
MF	GO:0005509	calcium ion binding	25	DNAH7	2.0231	0.0466365	1
MF	GO:0005509	calcium ion binding	25	EFEMP1	2.19646	0.0466365	1
MF	GO:0005509	calcium ion binding	25	SCUBE3	-2.94148	0.0466365	1
MF	GO:0005509	calcium ion binding	25	CASQ2	3.476	0.0466365	1
MF	GO:0005509	calcium ion binding	25	LRP1B	3.38171	0.0466365	1
MF	GO:0005509	calcium ion binding	25	PCDH17	-2.04457	0.0466365	1
MF	GO:0005509	calcium ion binding	25	ATP2B2	2.63562	0.0466365	1
MF	GO:0005509	calcium ion binding	25	CAPN3	-3.28417	0.0466365	1
CC	GO:0005741	mitochondrial outer membrane	4	TMEM173	-3.69815	0.0490764	-2
CC	GO:0005741	mitochondrial outer membrane	4	HK2	-2.06077	0.0490764	-2
CC	GO:0005741	mitochondrial outer membrane	4	LPIN1	-3.7009	0.0490764	-2
CC	GO:0005741	mitochondrial outer membrane	4	RSAD2	-4.97068	0.0490764	-2
BP	GO:1902476	chloride transmembrane transport	5	ANO9	-3.02432	0.049457	-1.34164
BP	GO:1902476	chloride transmembrane transport	5	BEST4	-3.54359	0.049457	-1.34164
BP	GO:1902476	chloride transmembrane transport	5	GLRA4	4.42127	0.049457	-1.34164
BP	GO:1902476	chloride transmembrane transport	5	SLC26A3	-6.99625	0.049457	-1.34164
BP	GO:1902476	chloride transmembrane transport	5	LOC424523	#NAME?	0.049457	-1.34164
BP	GO:0043065	positive regulation of apoptotic process	6	IL6	#NAME?	0.0545126	-1.63299
BP	GO:0043065	positive regulation of apoptotic process	6	TNFRSF8	-2.33371	0.0545126	-1.63299
BP	GO:0043065	positive regulation of apoptotic process	6	GRIN2A	2.46686	0.0545126	-1.63299
BP	GO:0043065	positive regulation of apoptotic process	6	RIPK2	-2.50557	0.0545126	-1.63299
BP	GO:0043065	positive regulation of apoptotic process	6	LOC100859853	-3.13935	0.0545126	-1.63299
BP	GO:0043065	positive regulation of apoptotic process	6	NET1	-2.28149	0.0545126	-1.63299
BP	GO:0070588	calcium ion transmembrane transport	6	CACNA1B	2.0531	0.0545126	1.63299
BP	GO:0070588	calcium ion transmembrane transport	6	GRIN2A	2.46686	0.0545126	1.63299
BP	GO:0070588	calcium ion transmembrane transport	6	CACNA2D3	-3.80883	0.0545126	1.63299
BP	GO:0070588	calcium ion transmembrane transport	6	GRM7	3.2195	0.0545126	1.63299
BP	GO:0070588	calcium ion transmembrane transport	6	TRPM8	2.05946	0.0545126	1.63299
BP	GO:0070588	calcium ion transmembrane transport	6	ATP2B2	2.63562	0.0545126	1.63299
BP	GO:0055114	oxidation-reduction process	23	XDH	-4.02816	0.0561351	-1.04257
BP	GO:0055114	oxidation-reduction process	23	FASN	-3.63063	0.0561351	-1.04257
BP	GO:0055114	oxidation-reduction process	23	LOC770996	3.28261	0.0561351	-1.04257
BP	GO:0055114	oxidation-reduction process	23	CYP4B1	4.55821	0.0561351	-1.04257
BP	GO:0055114	oxidation-reduction process	23	VCAM1	-4.20527	0.0561351	-1.04257
BP	GO:0055114	oxidation-reduction process	23	TPH1	-6.11686	0.0561351	-1.04257
BP	GO:0055114	oxidation-reduction process	23	PRODH	-3.21464	0.0561351	-1.04257
BP	GO:0055114	oxidation-reduction process	23	CYP1B1	3.04669	0.0561351	-1.04257
BP	GO:0055114	oxidation-reduction process	23	FMO4	4.9254	0.0561351	-1.04257
BP	GO:0055114	oxidation-reduction process	23	IL4I1	-5.13983	0.0561351	-1.04257
BP	GO:0055114	oxidation-reduction process	23	SOD3	-3.89706	0.0561351	-1.04257
BP	GO:0055114	oxidation-reduction process	23	NOXO1	-3.07092	0.0561351	-1.04257
BP	GO:0055114	oxidation-reduction process	23	CYP3A7	-3.68438	0.0561351	-1.04257
BP	GO:0055114	oxidation-reduction process	23	DIO2	-5.71179	0.0561351	-1.04257
BP	GO:0055114	oxidation-reduction process	23	CP	-5.29398	0.0561351	-1.04257
BP	GO:0055114	oxidation-reduction process	23	LDHA	-2.13242	0.0561351	-1.04257
BP	GO:0055114	oxidation-reduction process	23	INDOL1	4.01335	0.0561351	-1.04257
BP	GO:0055114	oxidation-reduction process	23	HSD3B7	3.86764	0.0561351	-1.04257
BP	GO:0055114	oxidation-reduction process	23	NOX3	2.16333	0.0561351	-1.04257
BP	GO:0055114	oxidation-reduction process	23	GLRX	-2.08301	0.0561351	-1.04257
BP	GO:0055114	oxidation-reduction process	23	TECRL	4.36912	0.0561351	-1.04257
BP	GO:0055114	oxidation-reduction process	23	DDO	2.27702	0.0561351	-1.04257
BP	GO:0055114	oxidation-reduction process	23	STEAP4	-4.06424	0.0561351	-1.04257
MF	GO:0005524	ATP binding	50	MAP2K6	2.51695	0.0572938	-3.67696
MF	GO:0005524	ATP binding	50	MOV10	-2.31151	0.0572938	-3.67696
MF	GO:0005524	ATP binding	50	DDX60	-5.53721	0.0572938	-3.67696
MF	GO:0005524	ATP binding	50	ACSBG2	-4.58689	0.0572938	-3.67696
MF	GO:0005524	ATP binding	50	PEX6	2.63417	0.0572938	-3.67696
MF	GO:0005524	ATP binding	50	MYH1B	4.18657	0.0572938	-3.67696
MF	GO:0005524	ATP binding	50	MYH1D	5.19232	0.0572938	-3.67696
MF	GO:0005524	ATP binding	50	MYH1F	5.40057	0.0572938	-3.67696
MF	GO:0005524	ATP binding	50	MYH7B	3.09075	0.0572938	-3.67696
MF	GO:0005524	ATP binding	50	IFIH1	-3.56291	0.0572938	-3.67696
MF	GO:0005524	ATP binding	50	SMCHD1	-2.5952	0.0572938	-3.67696
MF	GO:0005524	ATP binding	50	TAP1	-4.25273	0.0572938	-3.67696
MF	GO:0005524	ATP binding	50	KIT	-2.36783	0.0572938	-3.67696
MF	GO:0005524	ATP binding	50	TAP2	-3.08418	0.0572938	-3.67696
MF	GO:0005524	ATP binding	50	BMPR1B	2.12447	0.0572938	-3.67696
MF	GO:0005524	ATP binding	50	ATP10B	-3.55678	0.0572938	-3.67696
MF	GO:0005524	ATP binding	50	ASS1	-2.43747	0.0572938	-3.67696
MF	GO:0005524	ATP binding	50	APAF1	-2.18074	0.0572938	-3.67696
MF	GO:0005524	ATP binding	50	NLRC5	-3.04807	0.0572938	-3.67696
MF	GO:0005524	ATP binding	50	P2RX2	-2.77352	0.0572938	-3.67696
MF	GO:0005524	ATP binding	50	P2RX7	-6.05153	0.0572938	-3.67696
MF	GO:0005524	ATP binding	50	PXK	-2.11867	0.0572938	-3.67696
MF	GO:0005524	ATP binding	50	HK2	-2.06077	0.0572938	-3.67696
MF	GO:0005524	ATP binding	50	PIM1	-2.05736	0.0572938	-3.67696
MF	GO:0005524	ATP binding	50	RIPK2	-2.50557	0.0572938	-3.67696
MF	GO:0005524	ATP binding	50	OASL	-4.24924	0.0572938	-3.67696
MF	GO:0005524	ATP binding	50	RNF213	-3.35709	0.0572938	-3.67696
MF	GO:0005524	ATP binding	50	PAK6	2.32566	0.0572938	-3.67696
MF	GO:0005524	ATP binding	50	EIF2AK2	-2.43193	0.0572938	-3.67696
MF	GO:0005524	ATP binding	50	CARNS1	-2.60144	0.0572938	-3.67696
MF	GO:0005524	ATP binding	50	STYK1	-2.21783	0.0572938	-3.67696
MF	GO:0005524	ATP binding	50	MAP3K8	-3.38235	0.0572938	-3.67696
MF	GO:0005524	ATP binding	50	MYH7	3.04516	0.0572938	-3.67696
MF	GO:0005524	ATP binding	50	DHX58	-2.85547	0.0572938	-3.67696
MF	GO:0005524	ATP binding	50	IKBKE	-2.30739	0.0572938	-3.67696
MF	GO:0005524	ATP binding	50	LOC416633	-2.4696	0.0572938	-3.67696
MF	GO:0005524	ATP binding	50	ATP13A5	-5.26668	0.0572938	-3.67696
MF	GO:0005524	ATP binding	50	ACTC1	4.51679	0.0572938	-3.67696
MF	GO:0005524	ATP binding	50	TRPM6	-3.39862	0.0572938	-3.67696
MF	GO:0005524	ATP binding	50	MLKL	-5.99394	0.0572938	-3.67696
MF	GO:0005524	ATP binding	50	ALPK1	-3.54771	0.0572938	-3.67696
MF	GO:0005524	ATP binding	50	PFKFB3	-3.7357	0.0572938	-3.67696
MF	GO:0005524	ATP binding	50	CMPK2	-3.76962	0.0572938	-3.67696
MF	GO:0005524	ATP binding	50	PRKCQ	-3.62581	0.0572938	-3.67696
MF	GO:0005524	ATP binding	50	SIK1	-2.19736	0.0572938	-3.67696
MF	GO:0005524	ATP binding	50	PRKG2	-2.67787	0.0572938	-3.67696
MF	GO:0005524	ATP binding	50	LOC417192	-6.11867	0.0572938	-3.67696
MF	GO:0005524	ATP binding	50	LTK	2.36585	0.0572938	-3.67696
MF	GO:0005524	ATP binding	50	TRANK1	-3.46242	0.0572938	-3.67696
MF	GO:0005524	ATP binding	50	ATP2B2	2.63562	0.0572938	-3.67696
CC	GO:0043231	intracellular membrane-bounded organelle	6	MITD1	-2.8657	0.057374	-0.816497
CC	GO:0043231	intracellular membrane-bounded organelle	6	CD86	-3.00816	0.057374	-0.816497
CC	GO:0043231	intracellular membrane-bounded organelle	6	CYP1B1	3.04669	0.057374	-0.816497
CC	GO:0043231	intracellular membrane-bounded organelle	6	ATP13A5	-5.26668	0.057374	-0.816497
CC	GO:0043231	intracellular membrane-bounded organelle	6	NEU2	-4.01274	0.057374	-0.816497
CC	GO:0043231	intracellular membrane-bounded organelle	6	ATP2B2	2.63562	0.057374	-0.816497
CC	GO:0016459	myosin complex	4	MYH1D	5.19232	0.0573818	2
CC	GO:0016459	myosin complex	4	MYH1F	5.40057	0.0573818	2
CC	GO:0016459	myosin complex	4	MYH7B	3.09075	0.0573818	2
CC	GO:0016459	myosin complex	4	MYH7	3.04516	0.0573818	2
CC	GO:0072562	blood microparticle	4	C1S	-3.24785	0.0573818	0
CC	GO:0072562	blood microparticle	4	AHSG	2.11965	0.0573818	0
CC	GO:0072562	blood microparticle	4	CP	-5.29398	0.0573818	0
CC	GO:0072562	blood microparticle	4	ACTC1	4.51679	0.0573818	0
BP	GO:0070374	positive regulation of ERK1 and ERK2 cascade	6	CCLI10	-3.31282	0.05828	-2.44949
BP	GO:0070374	positive regulation of ERK1 and ERK2 cascade	6	LOC417536	-3.50486	0.05828	-2.44949
BP	GO:0070374	positive regulation of ERK1 and ERK2 cascade	6	FGF19	-3.51917	0.05828	-2.44949
BP	GO:0070374	positive regulation of ERK1 and ERK2 cascade	6	CCL19	-6.60982	0.05828	-2.44949
BP	GO:0070374	positive regulation of ERK1 and ERK2 cascade	6	CCL4	-6.256	0.05828	-2.44949
BP	GO:0070374	positive regulation of ERK1 and ERK2 cascade	6	CX3CL1	-3.03509	0.05828	-2.44949
MF	GO:0005178	integrin binding	4	EDIL3	3.42477	0.0588831	0
MF	GO:0005178	integrin binding	4	VCAM1	-4.20527	0.0588831	0
MF	GO:0005178	integrin binding	4	PTPN2	-2.59211	0.0588831	0
MF	GO:0005178	integrin binding	4	LOC776271	2.6756	0.0588831	0
MF	GO:0005516	calmodulin binding	5	MYH1B	4.18657	0.0597129	0.447214
MF	GO:0005516	calmodulin binding	5	VAMP2	-3.08827	0.0597129	0.447214
MF	GO:0005516	calmodulin binding	5	CALD1	-2.39864	0.0597129	0.447214
MF	GO:0005516	calmodulin binding	5	RYR2	2.16692	0.0597129	0.447214
MF	GO:0005516	calmodulin binding	5	ATP2B2	2.63562	0.0597129	0.447214
CC	GO:0009986	cell surface	13	MFI2	2.37922	0.0619121	0.27735
CC	GO:0009986	cell surface	13	LY6E	-2.31457	0.0619121	0.27735
CC	GO:0009986	cell surface	13	THBD	-2.86384	0.0619121	0.27735
CC	GO:0009986	cell surface	13	GRIN2A	2.46686	0.0619121	0.27735
CC	GO:0009986	cell surface	13	KCNE2	2.89861	0.0619121	0.27735
CC	GO:0009986	cell surface	13	KCNH5	2.58838	0.0619121	0.27735
CC	GO:0009986	cell surface	13	BG1	2.00938	0.0619121	0.27735
CC	GO:0009986	cell surface	13	RTN4R	2.57364	0.0619121	0.27735
CC	GO:0009986	cell surface	13	SDC4	-2.98066	0.0619121	0.27735
CC	GO:0009986	cell surface	13	SCUBE3	-2.94148	0.0619121	0.27735
CC	GO:0009986	cell surface	13	LIPG	-2.72365	0.0619121	0.27735
CC	GO:0009986	cell surface	13	SLC46A2	-5.24743	0.0619121	0.27735
CC	GO:0009986	cell surface	13	NDP	4.26364	0.0619121	0.27735
MF	GO:0004702	receptor signaling protein serine/threonine kinase activity	4	MAP2K6	2.51695	0.0625542	1
MF	GO:0004702	receptor signaling protein serine/threonine kinase activity	4	BMPR1B	2.12447	0.0625542	1
MF	GO:0004702	receptor signaling protein serine/threonine kinase activity	4	PAK6	2.32566	0.0625542	1
MF	GO:0004702	receptor signaling protein serine/threonine kinase activity	4	MAP3K8	-3.38235	0.0625542	1
MF	GO:0019905	syntaxin binding	4	SYT16	2.07446	0.0625542	0
MF	GO:0019905	syntaxin binding	4	TC2N	2.91139	0.0625542	0
MF	GO:0019905	syntaxin binding	4	VAMP2	-3.08827	0.0625542	0
MF	GO:0019905	syntaxin binding	4	PTPN2	-2.59211	0.0625542	0
MF	GO:0004872	receptor activity	5	SCARB2	2.48224	0.0627514	-0.447214
MF	GO:0004872	receptor activity	5	LOC770026	-2.12448	0.0627514	-0.447214
MF	GO:0004872	receptor activity	5	EDAR	3.54404	0.0627514	-0.447214
MF	GO:0004872	receptor activity	5	TLR3	-2.82016	0.0627514	-0.447214
MF	GO:0004872	receptor activity	5	CRTAM	-2.73916	0.0627514	-0.447214
BP	GO:0007165	signal transduction	16	PPP1R1C	2.94341	0.0648637	-1
BP	GO:0007165	signal transduction	16	STAT2	-2.09265	0.0648637	-1
BP	GO:0007165	signal transduction	16	CD83	-2.80183	0.0648637	-1
BP	GO:0007165	signal transduction	16	THBD	-2.86384	0.0648637	-1
BP	GO:0007165	signal transduction	16	LOC101748239	-2.10108	0.0648637	-1
BP	GO:0007165	signal transduction	16	RASSF5	-2.05513	0.0648637	-1
BP	GO:0007165	signal transduction	16	SELE	-5.6244	0.0648637	-1
BP	GO:0007165	signal transduction	16	LNPEP	-2.0719	0.0648637	-1
BP	GO:0007165	signal transduction	16	AKAP9	-2.10148	0.0648637	-1
BP	GO:0007165	signal transduction	16	GABRB2	4.43393	0.0648637	-1
BP	GO:0007165	signal transduction	16	LOC776271	2.6756	0.0648637	-1
BP	GO:0007165	signal transduction	16	SDC4	-2.98066	0.0648637	-1
BP	GO:0007165	signal transduction	16	TLR15	-2.66014	0.0648637	-1
BP	GO:0007165	signal transduction	16	TRHDE	2.01502	0.0648637	-1
BP	GO:0007165	signal transduction	16	PPAPDC1A	2.28046	0.0648637	-1
BP	GO:0007165	signal transduction	16	IL1RAPL2	2.99546	0.0648637	-1
CC	GO:0005578	proteinaceous extracellular matrix	9	COL9A3	-2.46517	0.0652239	1.66667
CC	GO:0005578	proteinaceous extracellular matrix	9	WNT11	2.36984	0.0652239	1.66667
CC	GO:0005578	proteinaceous extracellular matrix	9	GPC6	3.91051	0.0652239	1.66667
CC	GO:0005578	proteinaceous extracellular matrix	9	LOC101751203	3.22342	0.0652239	1.66667
CC	GO:0005578	proteinaceous extracellular matrix	9	PTPRZ1	2.35698	0.0652239	1.66667
CC	GO:0005578	proteinaceous extracellular matrix	9	OGN	2.07332	0.0652239	1.66667
CC	GO:0005578	proteinaceous extracellular matrix	9	TNR	2.48475	0.0652239	1.66667
CC	GO:0005578	proteinaceous extracellular matrix	9	LOC776271	2.6756	0.0652239	1.66667
CC	GO:0005578	proteinaceous extracellular matrix	9	COCH	-3.24197	0.0652239	1.66667
BP	GO:0008152	metabolic process	4	ACSM4	Inf	0.0667107	-1
BP	GO:0008152	metabolic process	4	BST1	-2.09441	0.0667107	-1
BP	GO:0008152	metabolic process	4	LOC101750112	-4.23572	0.0667107	-1
BP	GO:0008152	metabolic process	4	IRG1	-3.0412	0.0667107	-1
MF	GO:0008201	heparin binding	5	SPP1	-5.08407	0.0680824	0.447214
MF	GO:0008201	heparin binding	5	SERPINE2	-2.72776	0.0680824	0.447214
MF	GO:0008201	heparin binding	5	OGN	2.07332	0.0680824	0.447214
MF	GO:0008201	heparin binding	5	GREM2	3.36622	0.0680824	0.447214
MF	GO:0008201	heparin binding	5	LOC776271	2.6756	0.0680824	0.447214
BP	GO:0030308	negative regulation of cell growth	4	CDKN1A	-2.84205	0.073329	0
BP	GO:0030308	negative regulation of cell growth	4	WNT11	2.36984	0.073329	0
BP	GO:0030308	negative regulation of cell growth	4	SERPINE2	-2.72776	0.073329	0
BP	GO:0030308	negative regulation of cell growth	4	MYL2	5.15503	0.073329	0
BP	GO:0007507	heart development	6	LCN8	-4.06676	0.0773257	-0.816497
BP	GO:0007507	heart development	6	RBM20	2.91697	0.0773257	-0.816497
BP	GO:0007507	heart development	6	XIRP1	2.66578	0.0773257	-0.816497
BP	GO:0007507	heart development	6	SMYD1	-2.81984	0.0773257	-0.816497
BP	GO:0007507	heart development	6	FGF19	-3.51917	0.0773257	-0.816497
BP	GO:0007507	heart development	6	GJA1	-2.15989	0.0773257	-0.816497
CC	GO:0043025	neuronal cell body	6	OLFM1	2.35656	0.0789124	1.63299
CC	GO:0043025	neuronal cell body	6	CACNA1B	2.0531	0.0789124	1.63299
CC	GO:0043025	neuronal cell body	6	KNDC1	4.14269	0.0789124	1.63299
CC	GO:0043025	neuronal cell body	6	P2RX7	-6.05153	0.0789124	1.63299
CC	GO:0043025	neuronal cell body	6	RTN4R	2.57364	0.0789124	1.63299
CC	GO:0043025	neuronal cell body	6	ATP2B2	2.63562	0.0789124	1.63299
MF	GO:0005102	receptor binding	8	FKBP1B	2.15047	0.0816118	0
MF	GO:0005102	receptor binding	8	HAO1	2.40321	0.0816118	0
MF	GO:0005102	receptor binding	8	HAO2	2.11473	0.0816118	0
MF	GO:0005102	receptor binding	8	SERPINE2	-2.72776	0.0816118	0
MF	GO:0005102	receptor binding	8	LOC770026	-2.12448	0.0816118	0
MF	GO:0005102	receptor binding	8	STYK1	-2.21783	0.0816118	0
MF	GO:0005102	receptor binding	8	DDO	2.27702	0.0816118	0
MF	GO:0005102	receptor binding	8	CRTAM	-2.73916	0.0816118	0
MF	GO:0004252	serine-type endopeptidase activity	6	C1R	-2.11929	0.0820413	0.816497
MF	GO:0004252	serine-type endopeptidase activity	6	C1S	-3.24785	0.0820413	0.816497
MF	GO:0004252	serine-type endopeptidase activity	6	PRSS35	2.77835	0.0820413	0.816497
MF	GO:0004252	serine-type endopeptidase activity	6	TMPRSS2	2.02284	0.0820413	0.816497
MF	GO:0004252	serine-type endopeptidase activity	6	PCSK4	2.1832	0.0820413	0.816497
MF	GO:0004252	serine-type endopeptidase activity	6	PAMR1	2.40547	0.0820413	0.816497
CC	GO:0005667	transcription factor complex	7	HDAC9	2.02651	0.0842299	-1.13389
CC	GO:0005667	transcription factor complex	7	ALX1	Inf	0.0842299	-1.13389
CC	GO:0005667	transcription factor complex	7	GFI1B	-2.50183	0.0842299	-1.13389
CC	GO:0005667	transcription factor complex	7	FOS	-2.40977	0.0842299	-1.13389
CC	GO:0005667	transcription factor complex	7	RBPJL	-3.32883	0.0842299	-1.13389
CC	GO:0005667	transcription factor complex	7	CREM	-3.16402	0.0842299	-1.13389
CC	GO:0005667	transcription factor complex	7	NR4A3	-3.02177	0.0842299	-1.13389
BP	GO:0051092	positive regulation of NF-kappaB transcription factor activity	4	EIF2AK2	-2.43193	0.0846587	-2
BP	GO:0051092	positive regulation of NF-kappaB transcription factor activity	4	PRKCQ	-3.62581	0.0846587	-2
BP	GO:0051092	positive regulation of NF-kappaB transcription factor activity	4	TLR3	-2.82016	0.0846587	-2
BP	GO:0051092	positive regulation of NF-kappaB transcription factor activity	4	CAPN3	-3.28417	0.0846587	-2
BP	GO:0098792	xenophagy	4	STAT2	-2.09265	0.0891501	-1
BP	GO:0098792	xenophagy	4	SNTG1	2.35627	0.0891501	-1
BP	GO:0098792	xenophagy	4	ALPK1	-3.54771	0.0891501	-1
BP	GO:0098792	xenophagy	4	CALCOCO2	-2.11475	0.0891501	-1
MF	GO:0001077	transcriptional activator activity, RNA polymerase II core promoter proximal region sequence-specific binding	7	PITX3	2.11939	0.0891649	-1.13389
MF	GO:0001077	transcriptional activator activity, RNA polymerase II core promoter proximal region sequence-specific binding	7	ELF3	-4.60577	0.0891649	-1.13389
MF	GO:0001077	transcriptional activator activity, RNA polymerase II core promoter proximal region sequence-specific binding	7	EHF	-2.79543	0.0891649	-1.13389
MF	GO:0001077	transcriptional activator activity, RNA polymerase II core promoter proximal region sequence-specific binding	7	IRF1	-2.42864	0.0891649	-1.13389
MF	GO:0001077	transcriptional activator activity, RNA polymerase II core promoter proximal region sequence-specific binding	7	NR4A2	-4.24432	0.0891649	-1.13389
MF	GO:0001077	transcriptional activator activity, RNA polymerase II core promoter proximal region sequence-specific binding	7	NR4A3	-3.02177	0.0891649	-1.13389
MF	GO:0001077	transcriptional activator activity, RNA polymerase II core promoter proximal region sequence-specific binding	7	TLX1	2.58511	0.0891649	-1.13389
CC	GO:0005765	lysosomal membrane	7	ATP6V1C2	-2.03798	0.0918549	-1.88982
CC	GO:0005765	lysosomal membrane	7	TCIRG1	-2.77421	0.0918549	-1.88982
CC	GO:0005765	lysosomal membrane	7	LOC101748239	-2.10108	0.0918549	-1.88982
CC	GO:0005765	lysosomal membrane	7	SCARB2	2.48224	0.0918549	-1.88982
CC	GO:0005765	lysosomal membrane	7	LNPEP	-2.0719	0.0918549	-1.88982
CC	GO:0005765	lysosomal membrane	7	CP	-5.29398	0.0918549	-1.88982
CC	GO:0005765	lysosomal membrane	7	TLR3	-2.82016	0.0918549	-1.88982
BP	GO:0098779	mitophagy in response to mitochondrial depolarization	5	STAT2	-2.09265	0.0991432	-0.447214
BP	GO:0098779	mitophagy in response to mitochondrial depolarization	5	SLC6A1	3.75829	0.0991432	-0.447214
BP	GO:0098779	mitophagy in response to mitochondrial depolarization	5	HK2	-2.06077	0.0991432	-0.447214
BP	GO:0098779	mitophagy in response to mitochondrial depolarization	5	SNTG1	2.35627	0.0991432	-0.447214
BP	GO:0098779	mitophagy in response to mitochondrial depolarization	5	ALPK1	-3.54771	0.0991432	-0.447214
BP	GO:0016192	vesicle-mediated transport	4	SPIRE2	-3.36267	0.100554	0
BP	GO:0016192	vesicle-mediated transport	4	FMN2	4.7272	0.100554	0
BP	GO:0016192	vesicle-mediated transport	4	AMPH	3.32424	0.100554	0
BP	GO:0016192	vesicle-mediated transport	4	AP1S3	-2.54554	0.100554	0
MF	GO:0035091	phosphatidylinositol binding	4	MITD1	-2.8657	0.114152	-2
MF	GO:0035091	phosphatidylinositol binding	4	PXK	-2.11867	0.114152	-2
MF	GO:0035091	phosphatidylinositol binding	4	NOXO1	-3.07092	0.114152	-2
MF	GO:0035091	phosphatidylinositol binding	4	SNX10	-3.32953	0.114152	-2
CC	GO:0005576	extracellular region	13	SHH	-2.39584	0.118404	-1.38675
CC	GO:0005576	extracellular region	13	PRRG4	-2.38942	0.118404	-1.38675
CC	GO:0005576	extracellular region	13	C1R	-2.11929	0.118404	-1.38675
CC	GO:0005576	extracellular region	13	SPP2	2.1002	0.118404	-1.38675
CC	GO:0005576	extracellular region	13	AVD	-6.51028	0.118404	-1.38675
CC	GO:0005576	extracellular region	13	FGF19	-3.51917	0.118404	-1.38675
CC	GO:0005576	extracellular region	13	HPX	-3.57971	0.118404	-1.38675
CC	GO:0005576	extracellular region	13	CNP1	2.31957	0.118404	-1.38675
CC	GO:0005576	extracellular region	13	WFIKKN1	2.00258	0.118404	-1.38675
CC	GO:0005576	extracellular region	13	IGFBP2	3.18431	0.118404	-1.38675
CC	GO:0005576	extracellular region	13	PTGFR	-2.80744	0.118404	-1.38675
CC	GO:0005576	extracellular region	13	CHIA	-3.62745	0.118404	-1.38675
CC	GO:0005576	extracellular region	13	IL10	-7.46289	0.118404	-1.38675
BP	GO:0007605	sensory perception of sound	4	P2RX2	-2.77352	0.11905	0
BP	GO:0007605	sensory perception of sound	4	GRM7	3.2195	0.11905	0
BP	GO:0007605	sensory perception of sound	4	GABRB2	4.43393	0.11905	0
BP	GO:0007605	sensory perception of sound	4	COCH	-3.24197	0.11905	0
BP	GO:0043524	negative regulation of neuron apoptotic process	4	DLX1	-4.84062	0.11905	-1
BP	GO:0043524	negative regulation of neuron apoptotic process	4	GABRB2	4.43393	0.11905	-1
BP	GO:0043524	negative regulation of neuron apoptotic process	4	NR4A2	-4.24432	0.11905	-1
BP	GO:0043524	negative regulation of neuron apoptotic process	4	NR4A3	-3.02177	0.11905	-1
BP	GO:0002230	positive regulation of defense response to virus by host	4	STAT2	-2.09265	0.122901	-1
BP	GO:0002230	positive regulation of defense response to virus by host	4	IL12B	-4.75667	0.122901	-1
BP	GO:0002230	positive regulation of defense response to virus by host	4	SNTG1	2.35627	0.122901	-1
BP	GO:0002230	positive regulation of defense response to virus by host	4	ALPK1	-3.54771	0.122901	-1
CC	GO:0005764	lysosome	5	LOC417848	Inf	0.129841	-0.447214
CC	GO:0005764	lysosome	5	CTSS	-2.56664	0.129841	-0.447214
CC	GO:0005764	lysosome	5	NAAA	-2.02643	0.129841	-0.447214
CC	GO:0005764	lysosome	5	DRAM1	-4.52765	0.129841	-0.447214
CC	GO:0005764	lysosome	5	KCNE2	2.89861	0.129841	-0.447214
MF	GO:0008022	protein C-terminus binding	5	SPTBN5	-4.06984	0.129841	0.447214
MF	GO:0008022	protein C-terminus binding	5	CACNA1B	2.0531	0.129841	0.447214
MF	GO:0008022	protein C-terminus binding	5	PXK	-2.11867	0.129841	0.447214
MF	GO:0008022	protein C-terminus binding	5	SNTG1	2.35627	0.129841	0.447214
MF	GO:0008022	protein C-terminus binding	5	ATP2B2	2.63562	0.129841	0.447214
MF	GO:0005506	iron ion binding	6	XDH	-4.02816	0.141038	0
MF	GO:0005506	iron ion binding	6	MFI2	2.37922	0.141038	0
MF	GO:0005506	iron ion binding	6	CYP4B1	4.55821	0.141038	0
MF	GO:0005506	iron ion binding	6	TPH1	-6.11686	0.141038	0
MF	GO:0005506	iron ion binding	6	CYP1B1	3.04669	0.141038	0
MF	GO:0005506	iron ion binding	6	CYP3A7	-3.68438	0.141038	0
CC	GO:0048471	perinuclear region of cytoplasm	12	CAPN6	2.67077	0.142007	-1.73205
CC	GO:0048471	perinuclear region of cytoplasm	12	LOC423919	-2.37081	0.142007	-1.73205
CC	GO:0048471	perinuclear region of cytoplasm	12	STAT1	-3.90026	0.142007	-1.73205
CC	GO:0048471	perinuclear region of cytoplasm	12	TMEM100	-2.16026	0.142007	-1.73205
CC	GO:0048471	perinuclear region of cytoplasm	12	TMEM173	-3.69815	0.142007	-1.73205
CC	GO:0048471	perinuclear region of cytoplasm	12	VAMP2	-3.08827	0.142007	-1.73205
CC	GO:0048471	perinuclear region of cytoplasm	12	CDK2AP1	2.05683	0.142007	-1.73205
CC	GO:0048471	perinuclear region of cytoplasm	12	SELE	-5.6244	0.142007	-1.73205
CC	GO:0048471	perinuclear region of cytoplasm	12	LNPEP	-2.0719	0.142007	-1.73205
CC	GO:0048471	perinuclear region of cytoplasm	12	STC2	2.79658	0.142007	-1.73205
CC	GO:0048471	perinuclear region of cytoplasm	12	EIF2AK2	-2.43193	0.142007	-1.73205
CC	GO:0048471	perinuclear region of cytoplasm	12	CALCOCO2	-2.11475	0.142007	-1.73205
MF	GO:0004222	metalloendopeptidase activity	5	LOC101751203	3.22342	0.147081	-0.447214
MF	GO:0004222	metalloendopeptidase activity	5	MMP1	-4.87111	0.147081	-0.447214
MF	GO:0004222	metalloendopeptidase activity	5	MMP7	#NAME?	0.147081	-0.447214
MF	GO:0004222	metalloendopeptidase activity	5	MMP9	-2.86703	0.147081	-0.447214
MF	GO:0004222	metalloendopeptidase activity	5	MMEL1	4.05348	0.147081	-0.447214
BP	GO:0071805	potassium ion transmembrane transport	5	KCNA3	-3.15333	0.147081	0.447214
BP	GO:0071805	potassium ion transmembrane transport	5	KCNB2	2.22435	0.147081	0.447214
BP	GO:0071805	potassium ion transmembrane transport	5	KCNC1	3.73972	0.147081	0.447214
BP	GO:0071805	potassium ion transmembrane transport	5	KCNH5	2.58838	0.147081	0.447214
BP	GO:0071805	potassium ion transmembrane transport	5	TRPM5	-4.38886	0.147081	0.447214
CC	GO:0045211	postsynaptic membrane	4	GRIA3	2.6197	0.163328	1
CC	GO:0045211	postsynaptic membrane	4	CHRNA4	2.81589	0.163328	1
CC	GO:0045211	postsynaptic membrane	4	CHRM3	-2.86636	0.163328	1
CC	GO:0045211	postsynaptic membrane	4	GRIN2A	2.46686	0.163328	1
CC	GO:0043235	receptor complex	4	P2RX2	-2.77352	0.163328	0
CC	GO:0043235	receptor complex	4	GRM7	3.2195	0.163328	0
CC	GO:0043235	receptor complex	4	LRP1B	3.38171	0.163328	0
CC	GO:0043235	receptor complex	4	IL4R	-2.03605	0.163328	0
BP	GO:0042127	regulation of cell proliferation	6	LOC422654	-4.3787	0.16371	-1.63299
BP	GO:0042127	regulation of cell proliferation	6	TNFRSF18	-2.24402	0.16371	-1.63299
BP	GO:0042127	regulation of cell proliferation	6	TNFRSF6B	-3.91511	0.16371	-1.63299
BP	GO:0042127	regulation of cell proliferation	6	TNFRSF8	-2.33371	0.16371	-1.63299
BP	GO:0042127	regulation of cell proliferation	6	GKN2	4.00016	0.16371	-1.63299
BP	GO:0042127	regulation of cell proliferation	6	STYK1	-2.21783	0.16371	-1.63299
CC	GO:0005783	endoplasmic reticulum	17	OLFM1	2.35656	0.167938	-0.242536
CC	GO:0005783	endoplasmic reticulum	17	TMEM100	-2.16026	0.167938	-0.242536
CC	GO:0005783	endoplasmic reticulum	17	ATP10B	-3.55678	0.167938	-0.242536
CC	GO:0005783	endoplasmic reticulum	17	VCAM1	-4.20527	0.167938	-0.242536
CC	GO:0005783	endoplasmic reticulum	17	FOS	-2.40977	0.167938	-0.242536
CC	GO:0005783	endoplasmic reticulum	17	PTPN2	-2.59211	0.167938	-0.242536
CC	GO:0005783	endoplasmic reticulum	17	GRIN2A	2.46686	0.167938	-0.242536
CC	GO:0005783	endoplasmic reticulum	17	FNDC4	-3.38091	0.167938	-0.242536
CC	GO:0005783	endoplasmic reticulum	17	STC2	2.79658	0.167938	-0.242536
CC	GO:0005783	endoplasmic reticulum	17	CPED1	2.39938	0.167938	-0.242536
CC	GO:0005783	endoplasmic reticulum	17	LRRTM1	5.60919	0.167938	-0.242536
CC	GO:0005783	endoplasmic reticulum	17	RTN4R	2.57364	0.167938	-0.242536
CC	GO:0005783	endoplasmic reticulum	17	CRABP2	3.7772	0.167938	-0.242536
CC	GO:0005783	endoplasmic reticulum	17	SNX10	-3.32953	0.167938	-0.242536
CC	GO:0005783	endoplasmic reticulum	17	LOC417192	-6.11867	0.167938	-0.242536
CC	GO:0005783	endoplasmic reticulum	17	TSPO2	-2.5938	0.167938	-0.242536
CC	GO:0005783	endoplasmic reticulum	17	ATP2B2	2.63562	0.167938	-0.242536
BP	GO:0018108	peptidyl-tyrosine phosphorylation	4	KIT	-2.36783	0.16906	0
BP	GO:0018108	peptidyl-tyrosine phosphorylation	4	VCAM1	-4.20527	0.16906	0
BP	GO:0018108	peptidyl-tyrosine phosphorylation	4	EFEMP1	2.19646	0.16906	0
BP	GO:0018108	peptidyl-tyrosine phosphorylation	4	LTK	2.36585	0.16906	0
CC	GO:0016324	apical plasma membrane	5	TCIRG1	-2.77421	0.174045	-1.34164
CC	GO:0016324	apical plasma membrane	5	P2RX2	-2.77352	0.174045	-1.34164
CC	GO:0016324	apical plasma membrane	5	CYP3A7	-3.68438	0.174045	-1.34164
CC	GO:0016324	apical plasma membrane	5	TRPM6	-3.39862	0.174045	-1.34164
CC	GO:0016324	apical plasma membrane	5	ATP2B2	2.63562	0.174045	-1.34164
MF	GO:0020037	heme binding	5	CYP4B1	4.55821	0.179419	1.34164
MF	GO:0020037	heme binding	5	CYP1B1	3.04669	0.179419	1.34164
MF	GO:0020037	heme binding	5	STC2	2.79658	0.179419	1.34164
MF	GO:0020037	heme binding	5	CYP3A7	-3.68438	0.179419	1.34164
MF	GO:0020037	heme binding	5	INDOL1	4.01335	0.179419	1.34164
BP	GO:0042981	regulation of apoptotic process	5	TNFRSF18	-2.24402	0.179419	-2.23607
BP	GO:0042981	regulation of apoptotic process	5	TNFRSF6B	-3.91511	0.179419	-2.23607
BP	GO:0042981	regulation of apoptotic process	5	TNFRSF8	-2.33371	0.179419	-2.23607
BP	GO:0042981	regulation of apoptotic process	5	RASSF5	-2.05513	0.179419	-2.23607
BP	GO:0042981	regulation of apoptotic process	5	BIRC2	-2.49552	0.179419	-2.23607
BP	GO:0007155	cell adhesion	6	CNTNAP5	2.96805	0.181261	1.63299
BP	GO:0007155	cell adhesion	6	SPP1	-5.08407	0.181261	1.63299
BP	GO:0007155	cell adhesion	6	CNTN3	2.02645	0.181261	1.63299
BP	GO:0007155	cell adhesion	6	TNR	2.48475	0.181261	1.63299
BP	GO:0007155	cell adhesion	6	LOC776271	2.6756	0.181261	1.63299
BP	GO:0007155	cell adhesion	6	MYBPC3	3.43699	0.181261	1.63299
BP	GO:0007275	multicellular organism development	8	TNFRSF18	-2.24402	0.182276	0
BP	GO:0007275	multicellular organism development	8	TNFRSF6B	-3.91511	0.182276	0
BP	GO:0007275	multicellular organism development	8	LOC101751203	3.22342	0.182276	0
BP	GO:0007275	multicellular organism development	8	TNFRSF8	-2.33371	0.182276	0
BP	GO:0007275	multicellular organism development	8	ISL2	-2.33621	0.182276	0
BP	GO:0007275	multicellular organism development	8	DKK2	2.7704	0.182276	0
BP	GO:0007275	multicellular organism development	8	GLI1	2.01099	0.182276	0
BP	GO:0007275	multicellular organism development	8	TLX1	2.58511	0.182276	0
BP	GO:0043547	positive regulation of GTPase activity	13	WNT11	2.36984	0.187964	-0.83205
BP	GO:0043547	positive regulation of GTPase activity	13	CCLI10	-3.31282	0.187964	-0.83205
BP	GO:0043547	positive regulation of GTPase activity	13	KNDC1	4.14269	0.187964	-0.83205
BP	GO:0043547	positive regulation of GTPase activity	13	LOC417536	-3.50486	0.187964	-0.83205
BP	GO:0043547	positive regulation of GTPase activity	13	LOC427201	-2.46689	0.187964	-0.83205
BP	GO:0043547	positive regulation of GTPase activity	13	AMPH	3.32424	0.187964	-0.83205
BP	GO:0043547	positive regulation of GTPase activity	13	RGS8	2.47275	0.187964	-0.83205
BP	GO:0043547	positive regulation of GTPase activity	13	CCL19	-6.60982	0.187964	-0.83205
BP	GO:0043547	positive regulation of GTPase activity	13	RGS16	-4.50564	0.187964	-0.83205
BP	GO:0043547	positive regulation of GTPase activity	13	RTN4R	2.57364	0.187964	-0.83205
BP	GO:0043547	positive regulation of GTPase activity	13	NET1	-2.28149	0.187964	-0.83205
BP	GO:0043547	positive regulation of GTPase activity	13	CCL4	-6.256	0.187964	-0.83205
BP	GO:0043547	positive regulation of GTPase activity	13	CX3CL1	-3.03509	0.187964	-0.83205
BP	GO:0016477	cell migration	5	WNT11	2.36984	0.188291	-0.447214
BP	GO:0016477	cell migration	5	GPC6	3.91051	0.188291	-0.447214
BP	GO:0016477	cell migration	5	IL12B	-4.75667	0.188291	-0.447214
BP	GO:0016477	cell migration	5	STYK1	-2.21783	0.188291	-0.447214
BP	GO:0016477	cell migration	5	SDC4	-2.98066	0.188291	-0.447214
CC	GO:0005789	endoplasmic reticulum membrane	9	TAPBP	-2.20095	0.197377	-0.333333
CC	GO:0005789	endoplasmic reticulum membrane	9	TMEM173	-3.69815	0.197377	-0.333333
CC	GO:0005789	endoplasmic reticulum membrane	9	REEP6	2.15878	0.197377	-0.333333
CC	GO:0005789	endoplasmic reticulum membrane	9	FMN2	4.7272	0.197377	-0.333333
CC	GO:0005789	endoplasmic reticulum membrane	9	FMO4	4.9254	0.197377	-0.333333
CC	GO:0005789	endoplasmic reticulum membrane	9	PIGA	-2.07129	0.197377	-0.333333
CC	GO:0005789	endoplasmic reticulum membrane	9	ERAP1	-2.60306	0.197377	-0.333333
CC	GO:0005789	endoplasmic reticulum membrane	9	TM6SF2	2.07748	0.197377	-0.333333
CC	GO:0005789	endoplasmic reticulum membrane	9	RSAD2	-4.97068	0.197377	-0.333333
BP	GO:0008284	positive regulation of cell proliferation	8	NKX2-6	-4.03231	0.197429	-1.41421
BP	GO:0008284	positive regulation of cell proliferation	8	LCN8	-4.06676	0.197429	-1.41421
BP	GO:0008284	positive regulation of cell proliferation	8	KIT	-2.36783	0.197429	-1.41421
BP	GO:0008284	positive regulation of cell proliferation	8	MAB21L2	2.12631	0.197429	-1.41421
BP	GO:0008284	positive regulation of cell proliferation	8	FGF19	-3.51917	0.197429	-1.41421
BP	GO:0008284	positive regulation of cell proliferation	8	PTGFR	-2.80744	0.197429	-1.41421
BP	GO:0008284	positive regulation of cell proliferation	8	GLI1	2.01099	0.197429	-1.41421
BP	GO:0008284	positive regulation of cell proliferation	8	IL34	-2.71884	0.197429	-1.41421
MF	GO:0019899	enzyme binding	5	STAT1	-3.90026	0.209681	-0.447214
MF	GO:0019899	enzyme binding	5	CBX4	-2.1789	0.209681	-0.447214
MF	GO:0019899	enzyme binding	5	SCARB2	2.48224	0.209681	-0.447214
MF	GO:0019899	enzyme binding	5	NOXO1	-3.07092	0.209681	-0.447214
MF	GO:0019899	enzyme binding	5	STC2	2.79658	0.209681	-0.447214
CC	GO:0043005	neuron projection	5	SLC6A1	3.75829	0.215469	2.23607
CC	GO:0043005	neuron projection	5	SLC6A2	3.16617	0.215469	2.23607
CC	GO:0043005	neuron projection	5	GRIN2A	2.46686	0.215469	2.23607
CC	GO:0043005	neuron projection	5	PACRG	2.82305	0.215469	2.23607
CC	GO:0043005	neuron projection	5	AMPH	3.32424	0.215469	2.23607
BP	GO:0007156	homophilic cell adhesion via plasma membrane adhesion molecules	4	PIK3CB	-2.40142	0.221472	-2
BP	GO:0007156	homophilic cell adhesion via plasma membrane adhesion molecules	4	LOC770026	-2.12448	0.221472	-2
BP	GO:0007156	homophilic cell adhesion via plasma membrane adhesion molecules	4	PCDH17	-2.04457	0.221472	-2
BP	GO:0007156	homophilic cell adhesion via plasma membrane adhesion molecules	4	CRTAM	-2.73916	0.221472	-2
MF	GO:0004725	protein tyrosine phosphatase activity	4	PTPN2	-2.59211	0.221472	-1
MF	GO:0004725	protein tyrosine phosphatase activity	4	PTPRC	-2.14734	0.221472	-1
MF	GO:0004725	protein tyrosine phosphatase activity	4	PTPRZ1	2.35698	0.221472	-1
MF	GO:0004725	protein tyrosine phosphatase activity	4	DUSP5	-2.19772	0.221472	-1
BP	GO:0006915	apoptotic process	4	TMEM173	-3.69815	0.239912	-2
BP	GO:0006915	apoptotic process	4	MAP3K8	-3.38235	0.239912	-2
BP	GO:0006915	apoptotic process	4	IRF1	-2.42864	0.239912	-2
BP	GO:0006915	apoptotic process	4	CASP1	-2.01023	0.239912	-2
MF	GO:0016887	ATPase activity	4	RNF213	-3.35709	0.239912	0
MF	GO:0016887	ATPase activity	4	CARNS1	-2.60144	0.239912	0
MF	GO:0016887	ATPase activity	4	ACTC1	4.51679	0.239912	0
MF	GO:0016887	ATPase activity	4	DNAH7	2.0231	0.239912	0
BP	GO:0035335	peptidyl-tyrosine dephosphorylation	4	PTPN2	-2.59211	0.259993	-1
BP	GO:0035335	peptidyl-tyrosine dephosphorylation	4	PTPRC	-2.14734	0.259993	-1
BP	GO:0035335	peptidyl-tyrosine dephosphorylation	4	PTPRZ1	2.35698	0.259993	-1
BP	GO:0035335	peptidyl-tyrosine dephosphorylation	4	DUSP5	-2.19772	0.259993	-1
BP	GO:0043123	positive regulation of I-kappaB kinase/NF-kappaB signaling	4	LOC101748239	-2.10108	0.259993	-1
BP	GO:0043123	positive regulation of I-kappaB kinase/NF-kappaB signaling	4	EDAR	3.54404	0.259993	-1
BP	GO:0043123	positive regulation of I-kappaB kinase/NF-kappaB signaling	4	IKBKE	-2.30739	0.259993	-1
BP	GO:0043123	positive regulation of I-kappaB kinase/NF-kappaB signaling	4	TNIP2	-3.6593	0.259993	-1
BP	GO:0006366	transcription from RNA polymerase II promoter	10	ALX1	Inf	0.261245	-0.632456
BP	GO:0006366	transcription from RNA polymerase II promoter	10	NMI	-3.17772	0.261245	-0.632456
BP	GO:0006366	transcription from RNA polymerase II promoter	10	PITX3	2.11939	0.261245	-0.632456
BP	GO:0006366	transcription from RNA polymerase II promoter	10	LOC100858693	2.04158	0.261245	-0.632456
BP	GO:0006366	transcription from RNA polymerase II promoter	10	ELF3	-4.60577	0.261245	-0.632456
BP	GO:0006366	transcription from RNA polymerase II promoter	10	EHF	-2.79543	0.261245	-0.632456
BP	GO:0006366	transcription from RNA polymerase II promoter	10	IRF1	-2.42864	0.261245	-0.632456
BP	GO:0006366	transcription from RNA polymerase II promoter	10	NR4A2	-4.24432	0.261245	-0.632456
BP	GO:0006366	transcription from RNA polymerase II promoter	10	NR4A3	-3.02177	0.261245	-0.632456
BP	GO:0006366	transcription from RNA polymerase II promoter	10	TLX1	2.58511	0.261245	-0.632456
MF	GO:0008083	growth factor activity	4	IL6	#NAME?	0.279761	-1
MF	GO:0008083	growth factor activity	4	IL12B	-4.75667	0.279761	-1
MF	GO:0008083	growth factor activity	4	FGF19	-3.51917	0.279761	-1
MF	GO:0008083	growth factor activity	4	OGN	2.07332	0.279761	-1
MF	GO:0042802	identical protein binding	11	STAT2	-2.09265	0.289972	-2.11058
MF	GO:0042802	identical protein binding	11	C1S	-3.24785	0.289972	-2.11058
MF	GO:0042802	identical protein binding	11	APAF1	-2.18074	0.289972	-2.11058
MF	GO:0042802	identical protein binding	11	LECT2	-3.82852	0.289972	-2.11058
MF	GO:0042802	identical protein binding	11	P2RX2	-2.77352	0.289972	-2.11058
MF	GO:0042802	identical protein binding	11	TRIM55	4.2024	0.289972	-2.11058
MF	GO:0042802	identical protein binding	11	MMP9	-2.86703	0.289972	-2.11058
MF	GO:0042802	identical protein binding	11	NOXO1	-3.07092	0.289972	-2.11058
MF	GO:0042802	identical protein binding	11	RYR2	2.16692	0.289972	-2.11058
MF	GO:0042802	identical protein binding	11	B2M	-4.26241	0.289972	-2.11058
MF	GO:0042802	identical protein binding	11	TLR3	-2.82016	0.289972	-2.11058
CC	GO:0030424	axon	4	OLFM1	2.35656	0.305747	1
CC	GO:0030424	axon	4	SLC6A1	3.75829	0.305747	1
CC	GO:0030424	axon	4	LRRTM1	5.60919	0.305747	1
CC	GO:0030424	axon	4	KCNA3	-3.15333	0.305747	1
MF	GO:0046982	protein heterodimerization activity	9	ALX1	Inf	0.309125	-1
MF	GO:0046982	protein heterodimerization activity	9	BDKRB2	-3.41048	0.309125	-1
MF	GO:0046982	protein heterodimerization activity	9	SYT16	2.07446	0.309125	-1
MF	GO:0046982	protein heterodimerization activity	9	SPTBN5	-4.06984	0.309125	-1
MF	GO:0046982	protein heterodimerization activity	9	IL12B	-4.75667	0.309125	-1
MF	GO:0046982	protein heterodimerization activity	9	SLC51B	-2.78823	0.309125	-1
MF	GO:0046982	protein heterodimerization activity	9	ATF3	-2.35045	0.309125	-1
MF	GO:0046982	protein heterodimerization activity	9	TBX15	Inf	0.309125	-1
MF	GO:0046982	protein heterodimerization activity	9	NR4A2	-4.24432	0.309125	-1
MF	GO:0004871	signal transducer activity	4	STAT1	-3.90026	0.312794	-2
MF	GO:0004871	signal transducer activity	4	STAT2	-2.09265	0.312794	-2
MF	GO:0004871	signal transducer activity	4	LOC101748239	-2.10108	0.312794	-2
MF	GO:0004871	signal transducer activity	4	GNGT2	-3.59668	0.312794	-2
CC	GO:0005856	cytoskeleton	4	LOC422323	2.05181	0.312794	1
CC	GO:0005856	cytoskeleton	4	CALD1	-2.39864	0.312794	1
CC	GO:0005856	cytoskeleton	4	AMPH	3.32424	0.312794	1
CC	GO:0005856	cytoskeleton	4	SNTG1	2.35627	0.312794	1
CC	GO:0005768	endosome	4	BDKRB2	-3.41048	0.347638	-1
CC	GO:0005768	endosome	4	SNX10	-3.32953	0.347638	-1
CC	GO:0005768	endosome	4	STEAP4	-4.06424	0.347638	-1
CC	GO:0005768	endosome	4	PACSIN1	3.18887	0.347638	-1
BP	GO:0045892	negative regulation of transcription, DNA-templated	6	WNT11	2.36984	0.363728	-1.63299
BP	GO:0045892	negative regulation of transcription, DNA-templated	6	SMYD1	-2.81984	0.363728	-1.63299
BP	GO:0045892	negative regulation of transcription, DNA-templated	6	ELF3	-4.60577	0.363728	-1.63299
BP	GO:0045892	negative regulation of transcription, DNA-templated	6	IRF1	-2.42864	0.363728	-1.63299
BP	GO:0045892	negative regulation of transcription, DNA-templated	6	CREM	-3.16402	0.363728	-1.63299
BP	GO:0045892	negative regulation of transcription, DNA-templated	6	CAPN3	-3.28417	0.363728	-1.63299
MF	GO:0004930	G-protein coupled receptor activity	6	LOC422150	-2.138	0.36866	-2.44949
MF	GO:0004930	G-protein coupled receptor activity	6	GPR17	-2.25176	0.36866	-2.44949
MF	GO:0004930	G-protein coupled receptor activity	6	GPRC5A	-3.15587	0.36866	-2.44949
MF	GO:0004930	G-protein coupled receptor activity	6	SCTR	-2.87514	0.36866	-2.44949
MF	GO:0004930	G-protein coupled receptor activity	6	CRHR2	-2.13596	0.36866	-2.44949
MF	GO:0004930	G-protein coupled receptor activity	6	LOC101752158	-3.94264	0.36866	-2.44949
MF	GO:0003723	RNA binding	7	MOV10	-2.31151	0.372741	-1.88982
MF	GO:0003723	RNA binding	7	DDX60	-5.53721	0.372741	-1.88982
MF	GO:0003723	RNA binding	7	CELF2	-2.05905	0.372741	-1.88982
MF	GO:0003723	RNA binding	7	IFIT5	-4.89062	0.372741	-1.88982
MF	GO:0003723	RNA binding	7	RBM20	2.91697	0.372741	-1.88982
MF	GO:0003723	RNA binding	7	SAMHD1	-3.57606	0.372741	-1.88982
MF	GO:0003723	RNA binding	7	CNP	-3.19224	0.372741	-1.88982
CC	GO:0005622	intracellular	16	NYAP2	3.06631	0.379658	-1
CC	GO:0005622	intracellular	16	ANO9	-3.02432	0.379658	-1
CC	GO:0005622	intracellular	16	PML	-2.72109	0.379658	-1
CC	GO:0005622	intracellular	16	TRIM55	4.2024	0.379658	-1
CC	GO:0005622	intracellular	16	LOC427201	-2.46689	0.379658	-1
CC	GO:0005622	intracellular	16	NPR3	2.27683	0.379658	-1
CC	GO:0005622	intracellular	16	NOXO1	-3.07092	0.379658	-1
CC	GO:0005622	intracellular	16	LOC100857563	-3.54916	0.379658	-1
CC	GO:0005622	intracellular	16	CCL19	-6.60982	0.379658	-1
CC	GO:0005622	intracellular	16	KCNH5	2.58838	0.379658	-1
CC	GO:0005622	intracellular	16	RND3	-2.10452	0.379658	-1
CC	GO:0005622	intracellular	16	LOC770718	-2.53188	0.379658	-1
CC	GO:0005622	intracellular	16	PRKCQ	-3.62581	0.379658	-1
CC	GO:0005622	intracellular	16	LTK	2.36585	0.379658	-1
CC	GO:0005622	intracellular	16	RASL12	2.11083	0.379658	-1
CC	GO:0005622	intracellular	16	TIFA	-3.44905	0.379658	-1
MF	GO:0000977	RNA polymerase II regulatory region sequence-specific DNA binding	4	ALX1	Inf	0.381024	0
MF	GO:0000977	RNA polymerase II regulatory region sequence-specific DNA binding	4	NFKB2	-2.33242	0.381024	0
MF	GO:0000977	RNA polymerase II regulatory region sequence-specific DNA binding	4	LOC100858693	2.04158	0.381024	0
MF	GO:0000977	RNA polymerase II regulatory region sequence-specific DNA binding	4	DLX1	-4.84062	0.381024	0
BP	GO:0008285	negative regulation of cell proliferation	6	CDKN1A	-2.84205	0.384848	-1.63299
BP	GO:0008285	negative regulation of cell proliferation	6	WNT11	2.36984	0.384848	-1.63299
BP	GO:0008285	negative regulation of cell proliferation	6	PTPN2	-2.59211	0.384848	-1.63299
BP	GO:0008285	negative regulation of cell proliferation	6	RASSF5	-2.05513	0.384848	-1.63299
BP	GO:0008285	negative regulation of cell proliferation	6	SERPINE2	-2.72776	0.384848	-1.63299
BP	GO:0008285	negative regulation of cell proliferation	6	IRF1	-2.42864	0.384848	-1.63299
CC	GO:0015629	actin cytoskeleton	4	FMN2	4.7272	0.40808	0
CC	GO:0015629	actin cytoskeleton	4	MYRIP	-4.34593	0.40808	0
CC	GO:0015629	actin cytoskeleton	4	MYL2	5.15503	0.40808	0
CC	GO:0015629	actin cytoskeleton	4	SCNN1D	-3.76099	0.40808	0
BP	GO:0006468	protein phosphorylation	9	WNT11	2.36984	0.408754	-2.33333
BP	GO:0006468	protein phosphorylation	9	P2RX7	-6.05153	0.408754	-2.33333
BP	GO:0006468	protein phosphorylation	9	PXK	-2.11867	0.408754	-2.33333
BP	GO:0006468	protein phosphorylation	9	RIPK2	-2.50557	0.408754	-2.33333
BP	GO:0006468	protein phosphorylation	9	TRPM6	-3.39862	0.408754	-2.33333
BP	GO:0006468	protein phosphorylation	9	MLKL	-5.99394	0.408754	-2.33333
BP	GO:0006468	protein phosphorylation	9	ALPK1	-3.54771	0.408754	-2.33333
BP	GO:0006468	protein phosphorylation	9	SIK1	-2.19736	0.408754	-2.33333
BP	GO:0006468	protein phosphorylation	9	PRKG2	-2.67787	0.408754	-2.33333
MF	GO:0000981	RNA polymerase II transcription factor activity, sequence-specific DNA binding	4	NFKB2	-2.33242	0.414444	-1
MF	GO:0000981	RNA polymerase II transcription factor activity, sequence-specific DNA binding	4	ELF3	-4.60577	0.414444	-1
MF	GO:0000981	RNA polymerase II transcription factor activity, sequence-specific DNA binding	4	EHF	-2.79543	0.414444	-1
MF	GO:0000981	RNA polymerase II transcription factor activity, sequence-specific DNA binding	4	FOXO6	2.07451	0.414444	-1
BP	GO:0008283	cell proliferation	4	LY6E	-2.31457	0.414444	-1
BP	GO:0008283	cell proliferation	4	PIM1	-2.05736	0.414444	-1
BP	GO:0008283	cell proliferation	4	LIPA	-2.31942	0.414444	-1
BP	GO:0008283	cell proliferation	4	LTK	2.36585	0.414444	-1
MF	GO:0042803	protein homodimerization activity	15	STAT1	-3.90026	0.42613	-0.774597
MF	GO:0042803	protein homodimerization activity	15	MITD1	-2.8657	0.42613	-0.774597
MF	GO:0042803	protein homodimerization activity	15	SYT16	2.07446	0.42613	-0.774597
MF	GO:0042803	protein homodimerization activity	15	TMEM173	-3.69815	0.42613	-0.774597
MF	GO:0042803	protein homodimerization activity	15	KIT	-2.36783	0.42613	-0.774597
MF	GO:0042803	protein homodimerization activity	15	IL12B	-4.75667	0.42613	-0.774597
MF	GO:0042803	protein homodimerization activity	15	STC2	2.79658	0.42613	-0.774597
MF	GO:0042803	protein homodimerization activity	15	LOC770026	-2.12448	0.42613	-0.774597
MF	GO:0042803	protein homodimerization activity	15	ATF3	-2.35045	0.42613	-0.774597
MF	GO:0042803	protein homodimerization activity	15	GREM2	3.36622	0.42613	-0.774597
MF	GO:0042803	protein homodimerization activity	15	TRPM8	2.05946	0.42613	-0.774597
MF	GO:0042803	protein homodimerization activity	15	CALCOCO2	-2.11475	0.42613	-0.774597
MF	GO:0042803	protein homodimerization activity	15	TBX15	Inf	0.42613	-0.774597
MF	GO:0042803	protein homodimerization activity	15	CRTAM	-2.73916	0.42613	-0.774597
MF	GO:0042803	protein homodimerization activity	15	NDP	4.26364	0.42613	-0.774597
BP	GO:0045944	positive regulation of transcription from RNA polymerase II promoter	19	IL6	#NAME?	0.487571	-2.52357
BP	GO:0045944	positive regulation of transcription from RNA polymerase II promoter	19	ALX1	Inf	0.487571	-2.52357
BP	GO:0045944	positive regulation of transcription from RNA polymerase II promoter	19	HELZ2	-2.69865	0.487571	-2.52357
BP	GO:0045944	positive regulation of transcription from RNA polymerase II promoter	19	STAT1	-3.90026	0.487571	-2.52357
BP	GO:0045944	positive regulation of transcription from RNA polymerase II promoter	19	NFKB2	-2.33242	0.487571	-2.52357
BP	GO:0045944	positive regulation of transcription from RNA polymerase II promoter	19	PITX3	2.11939	0.487571	-2.52357
BP	GO:0045944	positive regulation of transcription from RNA polymerase II promoter	19	NLRC5	-3.04807	0.487571	-2.52357
BP	GO:0045944	positive regulation of transcription from RNA polymerase II promoter	19	LOC100858693	2.04158	0.487571	-2.52357
BP	GO:0045944	positive regulation of transcription from RNA polymerase II promoter	19	ELF3	-4.60577	0.487571	-2.52357
BP	GO:0045944	positive regulation of transcription from RNA polymerase II promoter	19	EHF	-2.79543	0.487571	-2.52357
BP	GO:0045944	positive regulation of transcription from RNA polymerase II promoter	19	LPIN1	-3.7009	0.487571	-2.52357
BP	GO:0045944	positive regulation of transcription from RNA polymerase II promoter	19	IRF1	-2.42864	0.487571	-2.52357
BP	GO:0045944	positive regulation of transcription from RNA polymerase II promoter	19	CREM	-3.16402	0.487571	-2.52357
BP	GO:0045944	positive regulation of transcription from RNA polymerase II promoter	19	TLR3	-2.82016	0.487571	-2.52357
BP	GO:0045944	positive regulation of transcription from RNA polymerase II promoter	19	TNIP2	-3.6593	0.487571	-2.52357
BP	GO:0045944	positive regulation of transcription from RNA polymerase II promoter	19	IL10	-7.46289	0.487571	-2.52357
BP	GO:0045944	positive regulation of transcription from RNA polymerase II promoter	19	NR4A2	-4.24432	0.487571	-2.52357
BP	GO:0045944	positive regulation of transcription from RNA polymerase II promoter	19	NR4A3	-3.02177	0.487571	-2.52357
BP	GO:0045944	positive regulation of transcription from RNA polymerase II promoter	19	TLX1	2.58511	0.487571	-2.52357
MF	GO:0008270	zinc ion binding	30	SHH	-2.39584	0.509517	-2.92119
MF	GO:0008270	zinc ion binding	30	RNF144A	2.19668	0.509517	-2.92119
MF	GO:0008270	zinc ion binding	30	IFIH1	-3.56291	0.509517	-2.92119
MF	GO:0008270	zinc ion binding	30	LOC101751203	3.22342	0.509517	-2.92119
MF	GO:0008270	zinc ion binding	30	CA9	2.18441	0.509517	-2.92119
MF	GO:0008270	zinc ion binding	30	PML	-2.72109	0.509517	-2.92119
MF	GO:0008270	zinc ion binding	30	RBM20	2.91697	0.509517	-2.92119
MF	GO:0008270	zinc ion binding	30	SAMHD1	-3.57606	0.509517	-2.92119
MF	GO:0008270	zinc ion binding	30	TRIM55	4.2024	0.509517	-2.92119
MF	GO:0008270	zinc ion binding	30	BIRC2	-2.49552	0.509517	-2.92119
MF	GO:0008270	zinc ion binding	30	ISL2	-2.33621	0.509517	-2.92119
MF	GO:0008270	zinc ion binding	30	MMP1	-4.87111	0.509517	-2.92119
MF	GO:0008270	zinc ion binding	30	MMP7	#NAME?	0.509517	-2.92119
MF	GO:0008270	zinc ion binding	30	MMP9	-2.86703	0.509517	-2.92119
MF	GO:0008270	zinc ion binding	30	ERAP1	-2.60306	0.509517	-2.92119
MF	GO:0008270	zinc ion binding	30	SOD3	-3.89706	0.509517	-2.92119
MF	GO:0008270	zinc ion binding	30	LNPEP	-2.0719	0.509517	-2.92119
MF	GO:0008270	zinc ion binding	30	NRAP	-2.67988	0.509517	-2.92119
MF	GO:0008270	zinc ion binding	30	RNF213	-3.35709	0.509517	-2.92119
MF	GO:0008270	zinc ion binding	30	DTX3L	-2.211	0.509517	-2.92119
MF	GO:0008270	zinc ion binding	30	LOC100857563	-3.54916	0.509517	-2.92119
MF	GO:0008270	zinc ion binding	30	TNFAIP3	-2.0834	0.509517	-2.92119
MF	GO:0008270	zinc ion binding	30	DHX58	-2.85547	0.509517	-2.92119
MF	GO:0008270	zinc ion binding	30	LOC770718	-2.53188	0.509517	-2.92119
MF	GO:0008270	zinc ion binding	30	TRHDE	2.01502	0.509517	-2.92119
MF	GO:0008270	zinc ion binding	30	RNF122	2.05685	0.509517	-2.92119
MF	GO:0008270	zinc ion binding	30	ESRRB	-2.21377	0.509517	-2.92119
MF	GO:0008270	zinc ion binding	30	RNF19B	-3.40825	0.509517	-2.92119
MF	GO:0008270	zinc ion binding	30	NR4A2	-4.24432	0.509517	-2.92119
MF	GO:0008270	zinc ion binding	30	NR4A3	-3.02177	0.509517	-2.92119
BP	GO:0045893	positive regulation of transcription, DNA-templated	6	WNT11	2.36984	0.532337	0
BP	GO:0045893	positive regulation of transcription, DNA-templated	6	RBPJL	-3.32883	0.532337	0
BP	GO:0045893	positive regulation of transcription, DNA-templated	6	GLI1	2.01099	0.532337	0
BP	GO:0045893	positive regulation of transcription, DNA-templated	6	FOXN4	-4.64552	0.532337	0
BP	GO:0045893	positive regulation of transcription, DNA-templated	6	NDP	4.26364	0.532337	0
BP	GO:0045893	positive regulation of transcription, DNA-templated	6	CAPN3	-3.28417	0.532337	0
CC	GO:0070062	extracellular exosome	53	ATP6V1C2	-2.03798	0.584417	-1.51097
CC	GO:0070062	extracellular exosome	53	MITD1	-2.8657	0.584417	-1.51097
CC	GO:0070062	extracellular exosome	53	EDIL3	3.42477	0.584417	-1.51097
CC	GO:0070062	extracellular exosome	53	MFI2	2.37922	0.584417	-1.51097
CC	GO:0070062	extracellular exosome	53	SPTBN5	-4.06984	0.584417	-1.51097
CC	GO:0070062	extracellular exosome	53	C1S	-3.24785	0.584417	-1.51097
CC	GO:0070062	extracellular exosome	53	NAAA	-2.02643	0.584417	-1.51097
CC	GO:0070062	extracellular exosome	53	CD86	-3.00816	0.584417	-1.51097
CC	GO:0070062	extracellular exosome	53	ACOT11	2.40849	0.584417	-1.51097
CC	GO:0070062	extracellular exosome	53	VCAM1	-4.20527	0.584417	-1.51097
CC	GO:0070062	extracellular exosome	53	APAF1	-2.18074	0.584417	-1.51097
CC	GO:0070062	extracellular exosome	53	TNFRSF8	-2.33371	0.584417	-1.51097
CC	GO:0070062	extracellular exosome	53	TMPRSS2	2.02284	0.584417	-1.51097
CC	GO:0070062	extracellular exosome	53	CMTM6	-2.67942	0.584417	-1.51097
CC	GO:0070062	extracellular exosome	53	HAO2	2.11473	0.584417	-1.51097
CC	GO:0070062	extracellular exosome	53	LOC101748239	-2.10108	0.584417	-1.51097
CC	GO:0070062	extracellular exosome	53	CNP	-3.19224	0.584417	-1.51097
CC	GO:0070062	extracellular exosome	53	NPR3	2.27683	0.584417	-1.51097
CC	GO:0070062	extracellular exosome	53	MMP7	#NAME?	0.584417	-1.51097
CC	GO:0070062	extracellular exosome	53	MMP9	-2.86703	0.584417	-1.51097
CC	GO:0070062	extracellular exosome	53	SERPINF1	-2.24283	0.584417	-1.51097
CC	GO:0070062	extracellular exosome	53	ERAP1	-2.60306	0.584417	-1.51097
CC	GO:0070062	extracellular exosome	53	SCARB2	2.48224	0.584417	-1.51097
CC	GO:0070062	extracellular exosome	53	SOD3	-3.89706	0.584417	-1.51097
CC	GO:0070062	extracellular exosome	53	RYR2	2.16692	0.584417	-1.51097
CC	GO:0070062	extracellular exosome	53	LOC100858320	3.1935	0.584417	-1.51097
CC	GO:0070062	extracellular exosome	53	B2M	-4.26241	0.584417	-1.51097
CC	GO:0070062	extracellular exosome	53	AHSG	2.11965	0.584417	-1.51097
CC	GO:0070062	extracellular exosome	53	C6	-3.97774	0.584417	-1.51097
CC	GO:0070062	extracellular exosome	53	CP	-5.29398	0.584417	-1.51097
CC	GO:0070062	extracellular exosome	53	TNFAIP3	-2.0834	0.584417	-1.51097
CC	GO:0070062	extracellular exosome	53	OGN	2.07332	0.584417	-1.51097
CC	GO:0070062	extracellular exosome	53	RND3	-2.10452	0.584417	-1.51097
CC	GO:0070062	extracellular exosome	53	GABRB2	4.43393	0.584417	-1.51097
CC	GO:0070062	extracellular exosome	53	ACTC1	4.51679	0.584417	-1.51097
CC	GO:0070062	extracellular exosome	53	RTN4R	2.57364	0.584417	-1.51097
CC	GO:0070062	extracellular exosome	53	CRABP2	3.7772	0.584417	-1.51097
CC	GO:0070062	extracellular exosome	53	SDC4	-2.98066	0.584417	-1.51097
CC	GO:0070062	extracellular exosome	53	SLC6A14	-4.57042	0.584417	-1.51097
CC	GO:0070062	extracellular exosome	53	ARMC3	-3.28322	0.584417	-1.51097
CC	GO:0070062	extracellular exosome	53	TRHDE	2.01502	0.584417	-1.51097
CC	GO:0070062	extracellular exosome	53	TGM4	-4.52921	0.584417	-1.51097
CC	GO:0070062	extracellular exosome	53	EFEMP1	2.19646	0.584417	-1.51097
CC	GO:0070062	extracellular exosome	53	LIPA	-2.31942	0.584417	-1.51097
CC	GO:0070062	extracellular exosome	53	NOX3	2.16333	0.584417	-1.51097
CC	GO:0070062	extracellular exosome	53	PDZK1	2.38578	0.584417	-1.51097
CC	GO:0070062	extracellular exosome	53	BTG2	-2.41223	0.584417	-1.51097
CC	GO:0070062	extracellular exosome	53	DPYS	2.61883	0.584417	-1.51097
CC	GO:0070062	extracellular exosome	53	SERINC2	-2.10712	0.584417	-1.51097
CC	GO:0070062	extracellular exosome	53	LOC100858751	-2.40955	0.584417	-1.51097
CC	GO:0070062	extracellular exosome	53	COCH	-3.24197	0.584417	-1.51097
CC	GO:0070062	extracellular exosome	53	ATP2B2	2.63562	0.584417	-1.51097
CC	GO:0070062	extracellular exosome	53	STEAP4	-4.06424	0.584417	-1.51097
MF	GO:0004674	protein serine/threonine kinase activity	6	PIM1	-2.05736	0.590061	-2.44949
MF	GO:0004674	protein serine/threonine kinase activity	6	RIPK2	-2.50557	0.590061	-2.44949
MF	GO:0004674	protein serine/threonine kinase activity	6	TRPM6	-3.39862	0.590061	-2.44949
MF	GO:0004674	protein serine/threonine kinase activity	6	ALPK1	-3.54771	0.590061	-2.44949
MF	GO:0004674	protein serine/threonine kinase activity	6	PRKCQ	-3.62581	0.590061	-2.44949
MF	GO:0004674	protein serine/threonine kinase activity	6	SIK1	-2.19736	0.590061	-2.44949
CC	GO:0005737	cytoplasm	76	CAPN6	2.67077	0.596966	-3.67065
CC	GO:0005737	cytoplasm	76	HDAC9	2.02651	0.596966	-3.67065
CC	GO:0005737	cytoplasm	76	MAP2K6	2.51695	0.596966	-3.67065
CC	GO:0005737	cytoplasm	76	MXI1	-2.13416	0.596966	-3.67065
CC	GO:0005737	cytoplasm	76	DDX60	-5.53721	0.596966	-3.67065
CC	GO:0005737	cytoplasm	76	ACSBG2	-4.58689	0.596966	-3.67065
CC	GO:0005737	cytoplasm	76	NMI	-3.17772	0.596966	-3.67065
CC	GO:0005737	cytoplasm	76	STAT2	-2.09265	0.596966	-3.67065
CC	GO:0005737	cytoplasm	76	CELF2	-2.05905	0.596966	-3.67065
CC	GO:0005737	cytoplasm	76	IFIH1	-3.56291	0.596966	-3.67065
CC	GO:0005737	cytoplasm	76	AVPR1B	-6.71116	0.596966	-3.67065
CC	GO:0005737	cytoplasm	76	WNT11	2.36984	0.596966	-3.67065
CC	GO:0005737	cytoplasm	76	AFF3	2.14891	0.596966	-3.67065
CC	GO:0005737	cytoplasm	76	ASS1	-2.43747	0.596966	-3.67065
CC	GO:0005737	cytoplasm	76	STRA8	-4.80671	0.596966	-3.67065
CC	GO:0005737	cytoplasm	76	TPH1	-6.11686	0.596966	-3.67065
CC	GO:0005737	cytoplasm	76	NFKBIA	-2.25915	0.596966	-3.67065
CC	GO:0005737	cytoplasm	76	LRRC6	-2.89572	0.596966	-3.67065
CC	GO:0005737	cytoplasm	76	IL12B	-4.75667	0.596966	-3.67065
CC	GO:0005737	cytoplasm	76	CMTR1	-2.4627	0.596966	-3.67065
CC	GO:0005737	cytoplasm	76	PXK	-2.11867	0.596966	-3.67065
CC	GO:0005737	cytoplasm	76	SERPINB2	-2.83829	0.596966	-3.67065
CC	GO:0005737	cytoplasm	76	CNP	-3.19224	0.596966	-3.67065
CC	GO:0005737	cytoplasm	76	KRT20	-3.85125	0.596966	-3.67065
CC	GO:0005737	cytoplasm	76	PIM1	-2.05736	0.596966	-3.67065
CC	GO:0005737	cytoplasm	76	SMYD1	-2.81984	0.596966	-3.67065
CC	GO:0005737	cytoplasm	76	RCAN2	2.14993	0.596966	-3.67065
CC	GO:0005737	cytoplasm	76	RIPK2	-2.50557	0.596966	-3.67065
CC	GO:0005737	cytoplasm	76	SOD3	-3.89706	0.596966	-3.67065
CC	GO:0005737	cytoplasm	76	OASL	-4.24924	0.596966	-3.67065
CC	GO:0005737	cytoplasm	76	LNPEP	-2.0719	0.596966	-3.67065
CC	GO:0005737	cytoplasm	76	STC1	-3.20513	0.596966	-3.67065
CC	GO:0005737	cytoplasm	76	HMGCS1	-4.31638	0.596966	-3.67065
CC	GO:0005737	cytoplasm	76	SERPINB10	-4.81724	0.596966	-3.67065
CC	GO:0005737	cytoplasm	76	SOCS1	-4.33819	0.596966	-3.67065
CC	GO:0005737	cytoplasm	76	SOCS3	-2.24837	0.596966	-3.67065
CC	GO:0005737	cytoplasm	76	DTX3L	-2.211	0.596966	-3.67065
CC	GO:0005737	cytoplasm	76	LRRTM1	5.60919	0.596966	-3.67065
CC	GO:0005737	cytoplasm	76	LRRTM4	2.23677	0.596966	-3.67065
CC	GO:0005737	cytoplasm	76	PAK6	2.32566	0.596966	-3.67065
CC	GO:0005737	cytoplasm	76	AMPH	3.32424	0.596966	-3.67065
CC	GO:0005737	cytoplasm	76	RGS8	2.47275	0.596966	-3.67065
CC	GO:0005737	cytoplasm	76	SNTG1	2.35627	0.596966	-3.67065
CC	GO:0005737	cytoplasm	76	MAP3K8	-3.38235	0.596966	-3.67065
CC	GO:0005737	cytoplasm	76	KLHL10	-3.84964	0.596966	-3.67065
CC	GO:0005737	cytoplasm	76	TNFAIP3	-2.0834	0.596966	-3.67065
CC	GO:0005737	cytoplasm	76	SLBP	-3.61328	0.596966	-3.67065
CC	GO:0005737	cytoplasm	76	DHX58	-2.85547	0.596966	-3.67065
CC	GO:0005737	cytoplasm	76	LOC100859853	-3.13935	0.596966	-3.67065
CC	GO:0005737	cytoplasm	76	RGS16	-4.50564	0.596966	-3.67065
CC	GO:0005737	cytoplasm	76	RTN4R	2.57364	0.596966	-3.67065
CC	GO:0005737	cytoplasm	76	IRF1	-2.42864	0.596966	-3.67065
CC	GO:0005737	cytoplasm	76	PTGFR	-2.80744	0.596966	-3.67065
CC	GO:0005737	cytoplasm	76	NEU2	-4.01274	0.596966	-3.67065
CC	GO:0005737	cytoplasm	76	ADCY2	-2.27121	0.596966	-3.67065
CC	GO:0005737	cytoplasm	76	MLKL	-5.99394	0.596966	-3.67065
CC	GO:0005737	cytoplasm	76	CHIA	-3.62745	0.596966	-3.67065
CC	GO:0005737	cytoplasm	76	INDOL1	4.01335	0.596966	-3.67065
CC	GO:0005737	cytoplasm	76	DNAH7	2.0231	0.596966	-3.67065
CC	GO:0005737	cytoplasm	76	ARMC3	-3.28322	0.596966	-3.67065
CC	GO:0005737	cytoplasm	76	CREM	-3.16402	0.596966	-3.67065
CC	GO:0005737	cytoplasm	76	GLI1	2.01099	0.596966	-3.67065
CC	GO:0005737	cytoplasm	76	TRHDE	2.01502	0.596966	-3.67065
CC	GO:0005737	cytoplasm	76	PRKCQ	-3.62581	0.596966	-3.67065
CC	GO:0005737	cytoplasm	76	NOX3	2.16333	0.596966	-3.67065
CC	GO:0005737	cytoplasm	76	SIK1	-2.19736	0.596966	-3.67065
CC	GO:0005737	cytoplasm	76	FOXO6	2.07451	0.596966	-3.67065
CC	GO:0005737	cytoplasm	76	GLRX	-2.08301	0.596966	-3.67065
CC	GO:0005737	cytoplasm	76	TECRL	4.36912	0.596966	-3.67065
CC	GO:0005737	cytoplasm	76	SDSL	-3.27902	0.596966	-3.67065
CC	GO:0005737	cytoplasm	76	TNIP2	-3.6593	0.596966	-3.67065
CC	GO:0005737	cytoplasm	76	IL16	-2.98188	0.596966	-3.67065
CC	GO:0005737	cytoplasm	76	DPYS	2.61883	0.596966	-3.67065
CC	GO:0005737	cytoplasm	76	TTC25	-2.70332	0.596966	-3.67065
CC	GO:0005737	cytoplasm	76	AQP3	2.61133	0.596966	-3.67065
CC	GO:0005737	cytoplasm	76	CAPN3	-3.28417	0.596966	-3.67065
BP	GO:0030154	cell differentiation	4	ELF3	-4.60577	0.617198	-1
BP	GO:0030154	cell differentiation	4	EHF	-2.79543	0.617198	-1
BP	GO:0030154	cell differentiation	4	STYK1	-2.21783	0.617198	-1
BP	GO:0030154	cell differentiation	4	GLI1	2.01099	0.617198	-1
BP	GO:0006357	regulation of transcription from RNA polymerase II promoter	7	FOS	-2.40977	0.617198	-1.88982
BP	GO:0006357	regulation of transcription from RNA polymerase II promoter	7	NFKBIZ	-2.97043	0.617198	-1.88982
BP	GO:0006357	regulation of transcription from RNA polymerase II promoter	7	RBPJL	-3.32883	0.617198	-1.88982
BP	GO:0006357	regulation of transcription from RNA polymerase II promoter	7	ELF3	-4.60577	0.617198	-1.88982
BP	GO:0006357	regulation of transcription from RNA polymerase II promoter	7	EHF	-2.79543	0.617198	-1.88982
BP	GO:0006357	regulation of transcription from RNA polymerase II promoter	7	FOSL2	-3.20078	0.617198	-1.88982
BP	GO:0006357	regulation of transcription from RNA polymerase II promoter	7	FOXO6	2.07451	0.617198	-1.88982
MF	GO:0019901	protein kinase binding	6	MAP2K6	2.51695	0.629776	-1.63299
MF	GO:0019901	protein kinase binding	6	SOCS1	-4.33819	0.629776	-1.63299
MF	GO:0019901	protein kinase binding	6	MLKL	-5.99394	0.629776	-1.63299
MF	GO:0019901	protein kinase binding	6	SIK1	-2.19736	0.629776	-1.63299
MF	GO:0019901	protein kinase binding	6	TNIP2	-3.6593	0.629776	-1.63299
MF	GO:0019901	protein kinase binding	6	NR4A3	-3.02177	0.629776	-1.63299
MF	GO:0003682	chromatin binding	6	NFKB2	-2.33242	0.65884	-1.63299
MF	GO:0003682	chromatin binding	6	CBX4	-2.1789	0.65884	-1.63299
MF	GO:0003682	chromatin binding	6	RBPJL	-3.32883	0.65884	-1.63299
MF	GO:0003682	chromatin binding	6	DLX1	-4.84062	0.65884	-1.63299
MF	GO:0003682	chromatin binding	6	GLI1	2.01099	0.65884	-1.63299
MF	GO:0003682	chromatin binding	6	FOXN4	-4.64552	0.65884	-1.63299
MF	GO:0005525	GTP binding	8	LOC419563	-3.43975	0.714577	-2.12132
MF	GO:0005525	GTP binding	8	RND3	-2.10452	0.714577	-2.12132
MF	GO:0005525	GTP binding	8	GBP	-3.22938	0.714577	-2.12132
MF	GO:0005525	GTP binding	8	GIMAP1	-2.05548	0.714577	-2.12132
MF	GO:0005525	GTP binding	8	LOC101751844	-2.30991	0.714577	-2.12132
MF	GO:0005525	GTP binding	8	LOC420368	-2.61061	0.714577	-2.12132
MF	GO:0005525	GTP binding	8	RASL12	2.11083	0.714577	-2.12132
MF	GO:0005525	GTP binding	8	RASD1	-3.50351	0.714577	-2.12132
MF	GO:0004842	ubiquitin-protein transferase activity	4	RNF213	-3.35709	0.730198	-2
MF	GO:0004842	ubiquitin-protein transferase activity	4	DTX3L	-2.211	0.730198	-2
MF	GO:0004842	ubiquitin-protein transferase activity	4	KLHL10	-3.84964	0.730198	-2
MF	GO:0004842	ubiquitin-protein transferase activity	4	TNFAIP3	-2.0834	0.730198	-2
MF	GO:0000166	nucleotide binding	6	CELF2	-2.05905	0.733395	-0.816497
MF	GO:0000166	nucleotide binding	6	RBM20	2.91697	0.733395	-0.816497
MF	GO:0000166	nucleotide binding	6	RCAN2	2.14993	0.733395	-0.816497
MF	GO:0000166	nucleotide binding	6	NT5C1B	-2.31747	0.733395	-0.816497
MF	GO:0000166	nucleotide binding	6	ADCY2	-2.27121	0.733395	-0.816497
MF	GO:0000166	nucleotide binding	6	TTC31	-2.68288	0.733395	-0.816497
BP	GO:0007264	small GTPase mediated signal transduction	4	KNDC1	4.14269	0.780599	0
BP	GO:0007264	small GTPase mediated signal transduction	4	RND3	-2.10452	0.780599	0
BP	GO:0007264	small GTPase mediated signal transduction	4	RASL12	2.11083	0.780599	0
BP	GO:0007264	small GTPase mediated signal transduction	4	RASD1	-3.50351	0.780599	0
BP	GO:0006351	transcription, DNA-templated	11	HDAC9	2.02651	0.7806	-0.904534
BP	GO:0006351	transcription, DNA-templated	11	NKX2-6	-4.03231	0.7806	-0.904534
BP	GO:0006351	transcription, DNA-templated	11	GFI1B	-2.50183	0.7806	-0.904534
BP	GO:0006351	transcription, DNA-templated	11	STAT1	-3.90026	0.7806	-0.904534
BP	GO:0006351	transcription, DNA-templated	11	NFKB2	-2.33242	0.7806	-0.904534
BP	GO:0006351	transcription, DNA-templated	11	PAX9	#NAME?	0.7806	-0.904534
BP	GO:0006351	transcription, DNA-templated	11	GLI1	2.01099	0.7806	-0.904534
BP	GO:0006351	transcription, DNA-templated	11	FOXN4	-4.64552	0.7806	-0.904534
BP	GO:0006351	transcription, DNA-templated	11	FOXO6	2.07451	0.7806	-0.904534
BP	GO:0006351	transcription, DNA-templated	11	TBX15	Inf	0.7806	-0.904534
BP	GO:0006351	transcription, DNA-templated	11	ESRRB	-2.21377	0.7806	-0.904534
BP	GO:0016567	protein ubiquitination	4	RNF213	-3.35709	0.802965	-2
BP	GO:0016567	protein ubiquitination	4	SOCS1	-4.33819	0.802965	-2
BP	GO:0016567	protein ubiquitination	4	SOCS3	-2.24837	0.802965	-2
BP	GO:0016567	protein ubiquitination	4	KLHL10	-3.84964	0.802965	-2
MF	GO:0043565	sequence-specific DNA binding	6	NKX2-6	-4.03231	0.86703	-0.816497
MF	GO:0043565	sequence-specific DNA binding	6	ISX	-2.1789	0.86703	-0.816497
MF	GO:0043565	sequence-specific DNA binding	6	ISL2	-2.33621	0.86703	-0.816497
MF	GO:0043565	sequence-specific DNA binding	6	GLI1	2.01099	0.86703	-0.816497
MF	GO:0043565	sequence-specific DNA binding	6	FOXO6	2.07451	0.86703	-0.816497
MF	GO:0043565	sequence-specific DNA binding	6	ESRRB	-2.21377	0.86703	-0.816497
BP	GO:0000122	negative regulation of transcription from RNA polymerase II promoter	10	HDAC9	2.02651	0.888707	-1.26491
BP	GO:0000122	negative regulation of transcription from RNA polymerase II promoter	10	ALX1	Inf	0.888707	-1.26491
BP	GO:0000122	negative regulation of transcription from RNA polymerase II promoter	10	NFKB2	-2.33242	0.888707	-1.26491
BP	GO:0000122	negative regulation of transcription from RNA polymerase II promoter	10	ISX	-2.1789	0.888707	-1.26491
BP	GO:0000122	negative regulation of transcription from RNA polymerase II promoter	10	CBX4	-2.1789	0.888707	-1.26491
BP	GO:0000122	negative regulation of transcription from RNA polymerase II promoter	10	DLX1	-4.84062	0.888707	-1.26491
BP	GO:0000122	negative regulation of transcription from RNA polymerase II promoter	10	ATF3	-2.35045	0.888707	-1.26491
BP	GO:0000122	negative regulation of transcription from RNA polymerase II promoter	10	TBX15	Inf	0.888707	-1.26491
BP	GO:0000122	negative regulation of transcription from RNA polymerase II promoter	10	NR4A2	-4.24432	0.888707	-1.26491
BP	GO:0000122	negative regulation of transcription from RNA polymerase II promoter	10	NR4A3	-3.02177	0.888707	-1.26491
CC	GO:0005794	Golgi apparatus	9	ALX1	Inf	0.895572	-1
CC	GO:0005794	Golgi apparatus	9	RNF144A	2.19668	0.895572	-1
CC	GO:0005794	Golgi apparatus	9	VCAM1	-4.20527	0.895572	-1
CC	GO:0005794	Golgi apparatus	9	SLC1A6	-4.07319	0.895572	-1
CC	GO:0005794	Golgi apparatus	9	STC2	2.79658	0.895572	-1
CC	GO:0005794	Golgi apparatus	9	B2M	-4.26241	0.895572	-1
CC	GO:0005794	Golgi apparatus	9	EHF	-2.79543	0.895572	-1
CC	GO:0005794	Golgi apparatus	9	TGM4	-4.52921	0.895572	-1
CC	GO:0005794	Golgi apparatus	9	LIPG	-2.72365	0.895572	-1
MF	GO:0003700	transcription factor activity, sequence-specific DNA binding	6	NKX2-6	-4.03231	0.895572	-2.44949
MF	GO:0003700	transcription factor activity, sequence-specific DNA binding	6	STAT2	-2.09265	0.895572	-2.44949
MF	GO:0003700	transcription factor activity, sequence-specific DNA binding	6	PAX9	#NAME?	0.895572	-2.44949
MF	GO:0003700	transcription factor activity, sequence-specific DNA binding	6	CREM	-3.16402	0.895572	-2.44949
MF	GO:0003700	transcription factor activity, sequence-specific DNA binding	6	FOXN4	-4.64552	0.895572	-2.44949
MF	GO:0003700	transcription factor activity, sequence-specific DNA binding	6	ESRRB	-2.21377	0.895572	-2.44949
CC	GO:0016020	membrane	17	HELZ2	-2.69865	0.902203	-2.18282
CC	GO:0016020	membrane	17	LOC770996	3.28261	0.902203	-2.18282
CC	GO:0016020	membrane	17	MDGA2	3.12475	0.902203	-2.18282
CC	GO:0016020	membrane	17	CNP	-3.19224	0.902203	-2.18282
CC	GO:0016020	membrane	17	DMBT1L	-3.93205	0.902203	-2.18282
CC	GO:0016020	membrane	17	OASL	-4.24924	0.902203	-2.18282
CC	GO:0016020	membrane	17	CYP3A7	-3.68438	0.902203	-2.18282
CC	GO:0016020	membrane	17	EIF2AK2	-2.43193	0.902203	-2.18282
CC	GO:0016020	membrane	17	PARP9	-3.16395	0.902203	-2.18282
CC	GO:0016020	membrane	17	ACTC1	4.51679	0.902203	-2.18282
CC	GO:0016020	membrane	17	NEU2	-4.01274	0.902203	-2.18282
CC	GO:0016020	membrane	17	CALCOCO2	-2.11475	0.902203	-2.18282
CC	GO:0016020	membrane	17	PIT54	-2.70742	0.902203	-2.18282
CC	GO:0016020	membrane	17	GRAMD1B	-2.70648	0.902203	-2.18282
CC	GO:0016020	membrane	17	PDE4B	-2.20938	0.902203	-2.18282
CC	GO:0016020	membrane	17	RASL12	2.11083	0.902203	-2.18282
CC	GO:0016020	membrane	17	RASD1	-3.50351	0.902203	-2.18282
BP	GO:0035556	intracellular signal transduction	5	KIT	-2.36783	0.908483	-2.23607
BP	GO:0035556	intracellular signal transduction	5	LOC427201	-2.46689	0.908483	-2.23607
BP	GO:0035556	intracellular signal transduction	5	NET1	-2.28149	0.908483	-2.23607
BP	GO:0035556	intracellular signal transduction	5	PRKCQ	-3.62581	0.908483	-2.23607
BP	GO:0035556	intracellular signal transduction	5	SIK1	-2.19736	0.908483	-2.23607
MF	GO:0003676	nucleic acid binding	5	CELF2	-2.05905	0.916843	-2.23607
MF	GO:0003676	nucleic acid binding	5	CMTR1	-2.4627	0.916843	-2.23607
MF	GO:0003676	nucleic acid binding	5	SAMHD1	-3.57606	0.916843	-2.23607
MF	GO:0003676	nucleic acid binding	5	ZNF800	-2.69951	0.916843	-2.23607
MF	GO:0003676	nucleic acid binding	5	TTC31	-2.68288	0.916843	-2.23607
CC	GO:0005829	cytosol	21	CDKN1A	-2.84205	0.933194	-2.4004
CC	GO:0005829	cytosol	21	XDH	-4.02816	0.933194	-2.4004
CC	GO:0005829	cytosol	21	NFKB2	-2.33242	0.933194	-2.4004
CC	GO:0005829	cytosol	21	ATP6V1G3	-5.81522	0.933194	-2.4004
CC	GO:0005829	cytosol	21	C1QTNF6	-2.59243	0.933194	-2.4004
CC	GO:0005829	cytosol	21	ACOT11	2.40849	0.933194	-2.4004
CC	GO:0005829	cytosol	21	FOS	-2.40977	0.933194	-2.4004
CC	GO:0005829	cytosol	21	NLRC5	-3.04807	0.933194	-2.4004
CC	GO:0005829	cytosol	21	FMN2	4.7272	0.933194	-2.4004
CC	GO:0005829	cytosol	21	HK2	-2.06077	0.933194	-2.4004
CC	GO:0005829	cytosol	21	SERPINE2	-2.72776	0.933194	-2.4004
CC	GO:0005829	cytosol	21	PACRG	2.82305	0.933194	-2.4004
CC	GO:0005829	cytosol	21	IL22RA2	-3.05037	0.933194	-2.4004
CC	GO:0005829	cytosol	21	NT5C1B	-2.31747	0.933194	-2.4004
CC	GO:0005829	cytosol	21	LDHA	-2.13242	0.933194	-2.4004
CC	GO:0005829	cytosol	21	C3AR1	-3.26295	0.933194	-2.4004
CC	GO:0005829	cytosol	21	CMPK2	-3.76962	0.933194	-2.4004
CC	GO:0005829	cytosol	21	PDE4B	-2.20938	0.933194	-2.4004
CC	GO:0005829	cytosol	21	ATP2B2	2.63562	0.933194	-2.4004
CC	GO:0005829	cytosol	21	OGDHL	2.34166	0.933194	-2.4004
CC	GO:0005829	cytosol	21	CAPN3	-3.28417	0.933194	-2.4004
CC	GO:0005925	focal adhesion	4	SCARB2	2.48224	0.9348	0
CC	GO:0005925	focal adhesion	4	B2M	-4.26241	0.9348	0
CC	GO:0005925	focal adhesion	4	RND3	-2.10452	0.9348	0
CC	GO:0005925	focal adhesion	4	ACTC1	4.51679	0.9348	0
MF	GO:0046872	metal ion binding	16	HELZ2	-2.69865	0.967091	-2.5
MF	GO:0046872	metal ion binding	16	PARP12	-2.68448	0.967091	-2.5
MF	GO:0046872	metal ion binding	16	GFI1B	-2.50183	0.967091	-2.5
MF	GO:0046872	metal ion binding	16	BNC1	2.9012	0.967091	-2.5
MF	GO:0046872	metal ion binding	16	KIT	-2.36783	0.967091	-2.5
MF	GO:0046872	metal ion binding	16	BMPR1B	2.12447	0.967091	-2.5
MF	GO:0046872	metal ion binding	16	LOC427201	-2.46689	0.967091	-2.5
MF	GO:0046872	metal ion binding	16	SMYD1	-2.81984	0.967091	-2.5
MF	GO:0046872	metal ion binding	16	HPX	-3.57971	0.967091	-2.5
MF	GO:0046872	metal ion binding	16	CARNS1	-2.60144	0.967091	-2.5
MF	GO:0046872	metal ion binding	16	ATP13A5	-5.26668	0.967091	-2.5
MF	GO:0046872	metal ion binding	16	ZNF800	-2.69951	0.967091	-2.5
MF	GO:0046872	metal ion binding	16	GLI1	2.01099	0.967091	-2.5
MF	GO:0046872	metal ion binding	16	TGM4	-4.52921	0.967091	-2.5
MF	GO:0046872	metal ion binding	16	PRKCQ	-3.62581	0.967091	-2.5
MF	GO:0046872	metal ion binding	16	PDE4B	-2.20938	0.967091	-2.5
CC	GO:0005813	centrosome	4	ODF2L	-2.34458	0.968849	-2
CC	GO:0005813	centrosome	4	AKAP9	-2.10148	0.968849	-2
CC	GO:0005813	centrosome	4	SNX10	-3.32953	0.968849	-2
CC	GO:0005813	centrosome	4	PDE4B	-2.20938	0.968849	-2
MF	GO:0003677	DNA binding	8	GFI1B	-2.50183	0.974292	-2.82843
MF	GO:0003677	DNA binding	8	STAT2	-2.09265	0.974292	-2.82843
MF	GO:0003677	DNA binding	8	IFIH1	-3.56291	0.974292	-2.82843
MF	GO:0003677	DNA binding	8	OASL	-4.24924	0.974292	-2.82843
MF	GO:0003677	DNA binding	8	AKAP9	-2.10148	0.974292	-2.82843
MF	GO:0003677	DNA binding	8	TNFAIP3	-2.0834	0.974292	-2.82843
MF	GO:0003677	DNA binding	8	PAX9	#NAME?	0.974292	-2.82843
MF	GO:0003677	DNA binding	8	DHX58	-2.85547	0.974292	-2.82843
BP	GO:0006355	regulation of transcription, DNA-templated	8	NKX2-6	-4.03231	0.974937	-2.12132
BP	GO:0006355	regulation of transcription, DNA-templated	8	GFI1B	-2.50183	0.974937	-2.12132
BP	GO:0006355	regulation of transcription, DNA-templated	8	STAT2	-2.09265	0.974937	-2.12132
BP	GO:0006355	regulation of transcription, DNA-templated	8	ISL2	-2.33621	0.974937	-2.12132
BP	GO:0006355	regulation of transcription, DNA-templated	8	PAX9	#NAME?	0.974937	-2.12132
BP	GO:0006355	regulation of transcription, DNA-templated	8	LOC416633	-2.4696	0.974937	-2.12132
BP	GO:0006355	regulation of transcription, DNA-templated	8	EFEMP1	2.19646	0.974937	-2.12132
BP	GO:0006355	regulation of transcription, DNA-templated	8	ESRRB	-2.21377	0.974937	-2.12132
CC	GO:0005739	mitochondrion	13	SLC25A47	-2.07071	0.991824	0.27735
CC	GO:0005739	mitochondrion	13	PRSS35	2.77835	0.991824	0.27735
CC	GO:0005739	mitochondrion	13	TAP1	-4.25273	0.991824	0.27735
CC	GO:0005739	mitochondrion	13	ACSM4	Inf	0.991824	0.27735
CC	GO:0005739	mitochondrion	13	GATM	3.38742	0.991824	0.27735
CC	GO:0005739	mitochondrion	13	TCIRG1	-2.77421	0.991824	0.27735
CC	GO:0005739	mitochondrion	13	HAO2	2.11473	0.991824	0.27735
CC	GO:0005739	mitochondrion	13	PACRG	2.82305	0.991824	0.27735
CC	GO:0005739	mitochondrion	13	PARP9	-3.16395	0.991824	0.27735
CC	GO:0005739	mitochondrion	13	MYOM2	3.8043	0.991824	0.27735
CC	GO:0005739	mitochondrion	13	IRG1	-3.0412	0.991824	0.27735
CC	GO:0005739	mitochondrion	13	CMPK2	-3.76962	0.991824	0.27735
CC	GO:0005739	mitochondrion	13	OGDHL	2.34166	0.991824	0.27735
CC	GO:0005730	nucleolus	6	MXI1	-2.13416	0.998085	-1.63299
CC	GO:0005730	nucleolus	6	STAT1	-3.90026	0.998085	-1.63299
CC	GO:0005730	nucleolus	6	PIK3CB	-2.40142	0.998085	-1.63299
CC	GO:0005730	nucleolus	6	FMN2	4.7272	0.998085	-1.63299
CC	GO:0005730	nucleolus	6	OASL	-4.24924	0.998085	-1.63299
CC	GO:0005730	nucleolus	6	ATF3	-2.35045	0.998085	-1.63299
CC	GO:0005634	nucleus	52	NKX2-6	-4.03231	0.99924	-3.60555
CC	GO:0005634	nucleus	52	STAT2	-2.09265	0.99924	-3.60555
CC	GO:0005634	nucleus	52	NFKB2	-2.33242	0.99924	-3.60555
CC	GO:0005634	nucleus	52	ISX	-2.1789	0.99924	-3.60555
CC	GO:0005634	nucleus	52	PITX3	2.11939	0.99924	-3.60555
CC	GO:0005634	nucleus	52	CELF2	-2.05905	0.99924	-3.60555
CC	GO:0005634	nucleus	52	TC2N	2.91139	0.99924	-3.60555
CC	GO:0005634	nucleus	52	REEP6	2.15878	0.99924	-3.60555
CC	GO:0005634	nucleus	52	GPC6	3.91051	0.99924	-3.60555
CC	GO:0005634	nucleus	52	FOS	-2.40977	0.99924	-3.60555
CC	GO:0005634	nucleus	52	STRA8	-4.80671	0.99924	-3.60555
CC	GO:0005634	nucleus	52	APAF1	-2.18074	0.99924	-3.60555
CC	GO:0005634	nucleus	52	NFKBIZ	-2.97043	0.99924	-3.60555
CC	GO:0005634	nucleus	52	NLRC5	-3.04807	0.99924	-3.60555
CC	GO:0005634	nucleus	52	PTPN2	-2.59211	0.99924	-3.60555
CC	GO:0005634	nucleus	52	RBM20	2.91697	0.99924	-3.60555
CC	GO:0005634	nucleus	52	SAMHD1	-3.57606	0.99924	-3.60555
CC	GO:0005634	nucleus	52	MAB21L2	2.12631	0.99924	-3.60555
CC	GO:0005634	nucleus	52	RBPJL	-3.32883	0.99924	-3.60555
CC	GO:0005634	nucleus	52	PXK	-2.11867	0.99924	-3.60555
CC	GO:0005634	nucleus	52	RASSF5	-2.05513	0.99924	-3.60555
CC	GO:0005634	nucleus	52	LOC100858693	2.04158	0.99924	-3.60555
CC	GO:0005634	nucleus	52	ISL2	-2.33621	0.99924	-3.60555
CC	GO:0005634	nucleus	52	SMYD1	-2.81984	0.99924	-3.60555
CC	GO:0005634	nucleus	52	CDK2AP1	2.05683	0.99924	-3.60555
CC	GO:0005634	nucleus	52	PACRG	2.82305	0.99924	-3.60555
CC	GO:0005634	nucleus	52	DLX1	-4.84062	0.99924	-3.60555
CC	GO:0005634	nucleus	52	ELF3	-4.60577	0.99924	-3.60555
CC	GO:0005634	nucleus	52	STC1	-3.20513	0.99924	-3.60555
CC	GO:0005634	nucleus	52	RP9	-2.23549	0.99924	-3.60555
CC	GO:0005634	nucleus	52	EHF	-2.79543	0.99924	-3.60555
CC	GO:0005634	nucleus	52	LPIN1	-3.7009	0.99924	-3.60555
CC	GO:0005634	nucleus	52	TNFAIP3	-2.0834	0.99924	-3.60555
CC	GO:0005634	nucleus	52	PAX9	#NAME?	0.99924	-3.60555
CC	GO:0005634	nucleus	52	ATF3	-2.35045	0.99924	-3.60555
CC	GO:0005634	nucleus	52	LOC100859853	-3.13935	0.99924	-3.60555
CC	GO:0005634	nucleus	52	NET1	-2.28149	0.99924	-3.60555
CC	GO:0005634	nucleus	52	ARMC3	-3.28322	0.99924	-3.60555
CC	GO:0005634	nucleus	52	SNX10	-3.32953	0.99924	-3.60555
CC	GO:0005634	nucleus	52	CREM	-3.16402	0.99924	-3.60555
CC	GO:0005634	nucleus	52	FOSL2	-3.20078	0.99924	-3.60555
CC	GO:0005634	nucleus	52	GLI1	2.01099	0.99924	-3.60555
CC	GO:0005634	nucleus	52	CMPK2	-3.76962	0.99924	-3.60555
CC	GO:0005634	nucleus	52	FOXN4	-4.64552	0.99924	-3.60555
CC	GO:0005634	nucleus	52	SIK1	-2.19736	0.99924	-3.60555
CC	GO:0005634	nucleus	52	FOXO6	2.07451	0.99924	-3.60555
CC	GO:0005634	nucleus	52	IL16	-2.98188	0.99924	-3.60555
CC	GO:0005634	nucleus	52	ESRRB	-2.21377	0.99924	-3.60555
CC	GO:0005634	nucleus	52	NR4A3	-3.02177	0.99924	-3.60555
CC	GO:0005634	nucleus	52	TLX1	2.58511	0.99924	-3.60555
CC	GO:0005634	nucleus	52	AQP3	2.61133	0.99924	-3.60555
CC	GO:0005634	nucleus	52	CAPN3	-3.28417	0.99924	-3.60555
CC	GO:0005654	nucleoplasm	17	ALX1	Inf	0.999974	-2.66789
CC	GO:0005654	nucleoplasm	17	NMI	-3.17772	0.999974	-2.66789
CC	GO:0005654	nucleoplasm	17	STAT1	-3.90026	0.999974	-2.66789
CC	GO:0005654	nucleoplasm	17	AFF3	2.14891	0.999974	-2.66789
CC	GO:0005654	nucleoplasm	17	CMTR1	-2.4627	0.999974	-2.66789
CC	GO:0005654	nucleoplasm	17	CNP	-3.19224	0.999974	-2.66789
CC	GO:0005654	nucleoplasm	17	SERPINB10	-4.81724	0.999974	-2.66789
CC	GO:0005654	nucleoplasm	17	DTX3L	-2.211	0.999974	-2.66789
CC	GO:0005654	nucleoplasm	17	EHF	-2.79543	0.999974	-2.66789
CC	GO:0005654	nucleoplasm	17	PARP9	-3.16395	0.999974	-2.66789
CC	GO:0005654	nucleoplasm	17	FAM188A	-2.18193	0.999974	-2.66789
CC	GO:0005654	nucleoplasm	17	CRABP2	3.7772	0.999974	-2.66789
CC	GO:0005654	nucleoplasm	17	PFKFB3	-3.7357	0.999974	-2.66789
CC	GO:0005654	nucleoplasm	17	CMPK2	-3.76962	0.999974	-2.66789
CC	GO:0005654	nucleoplasm	17	TNIP2	-3.6593	0.999974	-2.66789
CC	GO:0005654	nucleoplasm	17	NR4A2	-4.24432	0.999974	-2.66789
CC	GO:0005654	nucleoplasm	17	NBN	-2.88105	0.999974	-2.66789
MF	GO:0044822	poly(A) RNA binding	6	HELZ2	-2.69865	0.999974	-2.44949
MF	GO:0044822	poly(A) RNA binding	6	PARP12	-2.68448	0.999974	-2.44949
MF	GO:0044822	poly(A) RNA binding	6	OASL	-4.24924	0.999974	-2.44949
MF	GO:0044822	poly(A) RNA binding	6	RP9	-2.23549	0.999974	-2.44949
MF	GO:0044822	poly(A) RNA binding	6	EIF2AK2	-2.43193	0.999974	-2.44949
MF	GO:0044822	poly(A) RNA binding	6	ZNFX1	-2.3656	0.999974	-2.44949

## Sheet: MOCK VS CH
id	term	category	pval	Enrichment_score	Gene
GO:0019233	sensory perception of pain	biological_process	1.01329e-05	21.4379	PENK; CHRNA4; OPRM1
GO:0051607	defense response to virus	biological_process	2.87815e-05	11.1159	DDX60; IFIT5; OASL; RSAD2
GO:0007626	locomotory behavior	biological_process	0.000556886	7.89817	PENK; CHRNA4; OPRM1
GO:0007605	sensory perception of sound	biological_process	0.0010859	6.62052	GRM7; TSPEAR; GABRB2
GO:0007218	neuropeptide signaling pathway	biological_process	0.00180821	5.77174	PENK; GLRA4; OPRM1
GO:0007268	chemical synaptic transmission	biological_process	0.00207732	5.55797	PENK; GRM7; OPRM1
GO:0007264	small GTPase mediated signal transduction	biological_process	0.0321867	2.50109	RRAD; RHOV; RHOBTB3
GO:0007165	signal transduction	biological_process	0.0529741	1.96807	STAT2; GABRB2; SPOCK3; PDE9A
GO:0030054	cell junction	cellular_component	0.000509868	4.96905	GRIA4; CHRNA4; PTPRR; GLRA4; GABRB2
GO:0043235	receptor complex	cellular_component	0.00172417	5.8467	GPR37; GRM7; LRP1B
GO:0005622	intracellular	cellular_component	0.0022795	2.78543	RRAD; RHOV; ANO6; PML; DGKG; RLBP1; LOC100857563; LOC770718
GO:0005615	extracellular space	cellular_component	0.00379164	2.31582	LOC417536; LECT2; PTPRR; SERPINA1; CPM; PCSK1; CPA1; DKK2; SPOCK3; AGR2
GO:0005886	plasma membrane	cellular_component	0.0052209	1.88524	PENK; STAT2; SYT13; SLC9A9; GPR37; ANO6; EMP1; VAMP2; OSBPL3; PTPRR; CYP24A1; CPM; KLF5; GJA1; GABRB2
GO:0005887	integral component of plasma membrane	cellular_component	0.0688672	1.61113	SYT13; EPHA1; IL17REL; GRM7; GLRA4; SLC5A1; OPRM1
GO:0005829	cytosol	cellular_component	0.177157	1.28575	OSBPL3; CDO1; RHOBTB3; JPH2; CHAC1; OPRM1; PDE9A
GO:0005783	endoplasmic reticulum	cellular_component	0.256291	1.16631	GPR37; PHEX; AGR2
GO:0070062	extracellular exosome	cellular_component	0.335893	1.06498	SDCBP2; SPTBN5; MXRA5; ANO6; PPL; GUCA2B; MYO5C; RHOBTB3; CPM; EVPL; GABRB2
GO:0016020	membrane	cellular_component	0.447904	0.912251	RRAD; DMBT1L; OASL; JPH2
GO:0005525	GTP binding	molecular_function	0.0126908	2.59628	TUBAL3; RRAD; RHOV; RHOBTB3; LOC425049
GO:0003723	RNA binding	molecular_function	0.0368683	2.39466	DDX60; IFIT5; HNRPK
GO:0000978	RNA polymerase II core promoter proximal region sequence-specific DNA binding	molecular_function	0.0425821	2.28526	KLF5; ELF3; TBX15
GO:0046982	protein heterodimerization activity	molecular_function	0.0650398	1.98324	SDCBP2; SPTBN5; TBX15
GO:0005509	calcium ion binding	molecular_function	0.11091	1.52196	SYT13; DGKG; GRM7; SPOCK3; LRP1B
GO:0005524	ATP binding	molecular_function	0.12526	1.33867	DDX25; DDX60; EPHA1; DGKG; MYO1A; MYO5C; RHOBTB3; OASL; NEK10; ACTG2
GO:0042803	protein homodimerization activity	molecular_function	0.145468	1.43947	SDCBP2; ANO6; TBX15; AGR2
GO:0003677	DNA binding	molecular_function	0.162345	1.38628	STAT2; MKX; OASL; HNRPK
GO:0008270	zinc ion binding	molecular_function	0.216485	1.21721	LOC431003; PML; CPM; CPA1; LOC100857563; LOC770718; LNX1
